# Supplementary material for: Height-volume characteristics of a fuel tank
Source: Royal Society of Chemistry journal article supplement (doi:10.1039/c5cc04390e), 2007-04-17

## Palladium-Catalyzed Oxalyl Amide Assisted Direct *ortho*-Alkynylation of Arylalkylamines Derivatives at $\delta$ and $\epsilon$ Positions

Mingyu Guan,<sup>a</sup> Changpeng Chen,<sup>a</sup> Jingyu Zhang,<sup>b</sup> Runsheng Zeng\*<sup>a</sup> and Yingsheng Zhao\*<sup>a</sup>

<sup>a</sup>College of Chemistry, Chemical Engineering and Materials Science, Soochow University, Suzhou 215123, P. R. China

<sup>b</sup>College of Physics, Optoelectronics and Energy & Collaborative Innovation Center of Suzhou Nano Science and Technology, Soochow University, Suzhou 215006, P. R. China

### *Supporting information*

#### **Table of Contents**

|                                                                            |     |
|----------------------------------------------------------------------------|-----|
| 1. Reagents.....                                                           | S2  |
| 2. Instruments.....                                                        | S2  |
| 3. Preparation of Oxalamide Substrates.....                                | S2  |
| 4. Optimization of Reaction Conditions .....                               | S13 |
| 5. <i>ortho</i> -Alkynylation of $\beta$ -Arylethamine Derivatives .....   | S13 |
| 6. <i>ortho</i> -Alkynylation of $\gamma$ -Arylpropamine Derivatives ..... | S23 |
| 7. Gram Scale Reaction .....                                               | S26 |
| 8. Removal of the TIPS.....                                                | S27 |
| 9. Removal of the Directing Group .....                                    | S27 |
| 10. Synthesis of 3,4-Dihydroisoquinoline <b>8a</b> .....                   | S28 |
| 11. Optimization of Protecting Group .....                                 | S29 |
| 12. Alkynylation of different substituted bromoalkyne.....                 | S29 |
| 13. Alkynylation of $\delta$ -Arylbutamine Derivatives .....               | S30 |
| 14. References.....                                                        | S30 |
| 15. NMR spectra .....                                                      | S31 |

**1. Reagents:** Unless otherwise noted, all reagents were purchased from commercial suppliers and used without further purification. Column chromatography purifications were performed using 300–400 mesh silica gel.

**2. Instruments:** NMR spectra were recorded on Varian Inova–400 MHz, Inova–300 MHz, Bruker DRX–400 or Bruker DRX–500 instruments and calibrated using residual solvent peaks as internal reference. Multiplicities are recorded as: s = singlet, d = doublet, t = triplet, dd = doublet of doublets, br = broad singlet, m = multiplet. HRMS analyses were carried out using a Bruker micrOTOF–Q instrument or a TOF–MS instrument.

### 3. Preparation of Oxalamide Substrates

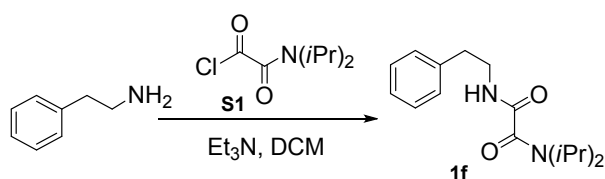

#### 3.1 Preparation of N, N–Diisopropyl oxamoyl Chloride S1<sup>[1]</sup>

A solution of Diisopropylamine (7.01 mL, 50 mmol, 1.0 equiv) in CH<sub>2</sub>Cl<sub>2</sub> (50 mL) was added dropwise to a solution of oxalyl chloride (6.44 mL, 75 mmol, 1.5 equiv) in CH<sub>2</sub>Cl<sub>2</sub> (100 mL) at 0 °C, after stirring for 5 min, triethylamine (7.30 mL, 52.5 mmol, 1.05 equiv) was added dropwise. The solution was warmed to room temperature and stirred for 6 hours. The excess of oxalyl chloride and the solvent were removed under reduce pressure and CH<sub>2</sub>Cl<sub>2</sub> (30 mL) was added and evaporated. This operation was performed twice to give **1f** as a pale yellow solid. The crude product was used in the next step without any purification.

#### 3.2 General procedures for the preparation of oxalamide substrates **1a–1r** (except **1i**, **1k**, **1l**, **1q**), **4a–4h**, **4j**<sup>[2]</sup>

A solution of amine (20 mmol, 1.0 equiv) in CH<sub>2</sub>Cl<sub>2</sub> (40 mL) was added dropwise to a solution of N,N–Diisopropyl oxamoyl chloride **S1** (25 mmol, 1.25 equiv) in CH<sub>2</sub>Cl<sub>2</sub> (50 mL) at 0 °C, after stirring for 5 min, triethylamine (2.92 mL, 21 mmol, 1.05 equiv) was added dropwise and then the mixture was stirred for 6 hours at room temperature before quenched by water (50 mL). The organic layer was separated and the aqueous layer was extracted with CH<sub>2</sub>Cl<sub>2</sub> (20 mL × 2). The combined organic phase was washed with brine (30 mL), and then dried over anhydrous Na<sub>2</sub>SO<sub>4</sub>. Evaporation and column chromatography on silica gel afforded corresponding amide substrates as white solid or colourless liquid with >90% yield

#### 3.3 Preparation of **1i**<sup>[3]</sup>

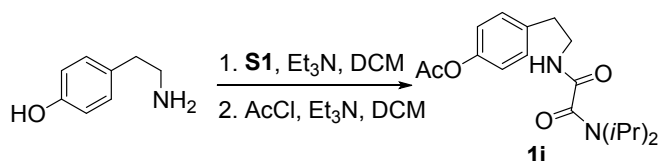

The first step using 4-(2-aminoethyl)phenol (2.74 g, 20 mmol, 1.0 equiv) as starting material followed the general oxalamide coupling procedure, affording a white solid. The solid was dissolved in DCM

(30 mL) and treated with AcCl (1.56 mL, 22 mmol, 1.1 equiv) and Et<sub>3</sub>N (5.56 mL, 40 mmol, 2.0 equiv) at room temperature overnight. Water was added and the mixture was extracted with DCM. The combined organic layer was washed with water and brine, dried over anhydrous Na<sub>2</sub>SO<sub>4</sub>, and concentrated in vacuo. The resulting residue was purified by column chromatography on silica gel to give the product **1i** 4.21 g, 63%.

### 3.4 Preparation of **1k**<sup>[4]</sup>

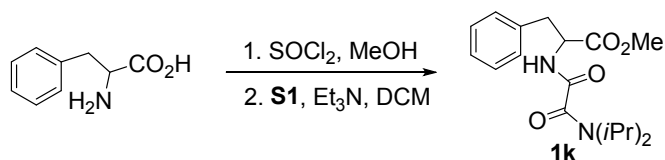

To a solution of homophenylalanine (3.30g, 20 mmol, 1.0 equiv) in MeOH (30 mL), at 0 °C, was added SOCl<sub>2</sub> (4.35 mL, 60 mmol, 3.0 equiv) dropwise. The resulting mixture was allowed to stir from 0 °C to room temperature overnight. The solvent was removed under reduced pressure to afford a white solid, which was used directly for next step. The second step followed the general oxalamide coupling procedure, to give the product **1k** 5.21 g, 78%.

### 3.5 Preparation of **1l**

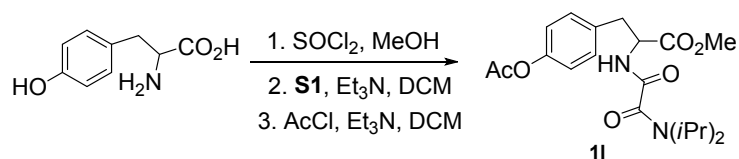

To a solution of homophenylalanine (3.30g, 20 mmol, 1.0 equiv) in MeOH (30 mL), at 0 °C, was added SOCl<sub>2</sub> (4.35 mL, 60 mmol, 3.0 equiv) dropwise. The resulting mixture was allowed to stir from 0 °C to room temperature overnight. The solvent was removed under reduced pressure to afford a white solid, which was used directly for next step. The second step followed the procedure of **1i** to give the product **1l** 5.65 g, 72%.

### 3.6 Preparation of **1q**<sup>[5]</sup>

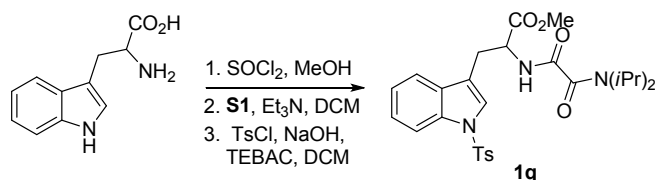

To a solution of tryptophan (2 g, 10 mmol, 1.0 equiv) in MeOH (20 mL), at 0 °C, was added SOCl<sub>2</sub> (2.1 mL, 30 mmol, 3.0 equiv) dropwise. The resulting mixture was allowed to stir from 0 °C to room temperature overnight. The solvent was removed under reduced pressure to afford a white solid, which was used directly for next step. The second step followed the procedure of **1a**. Then TsCl (15 mmol, 1.5 equiv), NaOH (0.8 g, 20 mmol, 2.0 equiv), TEBAC (3.4 g, 15 mmol, 1.5 equiv) were added, the resulting mixture was allowed to stir at room temperature overnight. Water was added and the mixture was extracted with DCM. The combined organic layer was washed with water and brine, dried over

anhydrous Na<sub>2</sub>SO<sub>4</sub>, and concentrated in vacuo. The resulting residue was purified by column chromatography on silica gel to give the product **1q** 3.90 g, 74%.

### 3.7 Preparation of **1q**

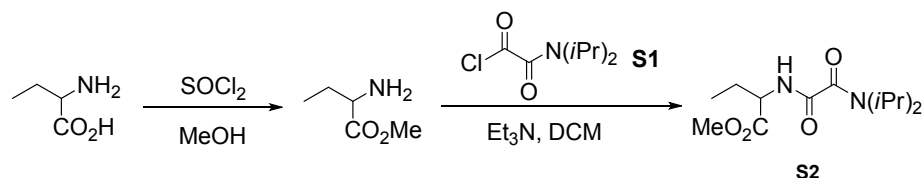

SOCl<sub>2</sub> (4.35 mL, 60 mmol, 3.0 equiv) was added dropwise to a solution of amino acid (20 mmol, 1.0 equiv) in MeOH (30 mL) at 0 °C. The resulting mixture was allowed to stir from 0 °C to rt overnight. The solvent was removed under reduced pressure to give white solid, which was used directly for next step. A solution of white solid (20 mmol, 1.0 equiv) in CH<sub>2</sub>Cl<sub>2</sub> (40 mL) was added dropwise to a solution of N,N-Diisopropyl oxamoyl chloride **S1** (25 mmol, 1.25 equiv) in CH<sub>2</sub>Cl<sub>2</sub> (50 mL) at 0 °C, after stirring for 5 min, triethylamine (2.92 mL, 21 mmol, 1.05 equiv) was added dropwise and then the mixture was stirred for 6 hours at room temperature before quenched by water (50 mL). The organic layer was separated and the aqueous layer was extracted with CH<sub>2</sub>Cl<sub>2</sub> (20 mL × 2). The combined organic phase was washed with brine (30 mL), and then dried over anhydrous Na<sub>2</sub>SO<sub>4</sub>. Evaporation and column chromatography on silica gel afforded corresponding amide substrates as white solid or colourless oil with >70% yield.

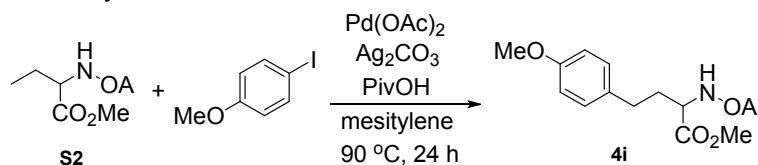

A mixture of **S2** (545 mg, 2 mmol), ArI (3 mmol, 1.5 equiv), Pd(OAc)<sub>2</sub> (22 mg, 5 mol %), Ag<sub>2</sub>CO<sub>3</sub> (552 mg, 1.0 equiv), PivOH (61 mg, 0.3 equiv) and 6 mL mesitylene in a 25 mL glass vial was heated at 90 °C with vigorous stirring for 24 hours. The reaction mixture was cooled to room temperature, and diluted with ethyl acetate and filtered through celite. The filtrate was concentrated in vacuo and purified by column chromatography on silica gel (Ethyl acetate/Petroleum ether = 1:20 to 1:2) to give product **4i** 643mg, 85%.

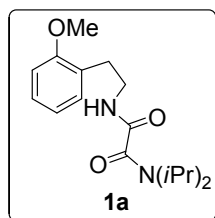

<sup>1</sup>H NMR (400 MHz, CDCl<sub>3</sub>) δ 7.20 (t, *J* = 7.6 Hz, 1H), 7.14–7.13 (m, 2H), 6.90–6.84 (m, 2H), 4.62–4.59 (m, 1H), 3.82 (s, 3H), 3.53–3.43 (m, 3H), 2.86 (t, *J* = 6.7 Hz, 2H), 1.39 (d, *J* = 6.7 Hz, 6H), 1.18 (d, *J* = 6.5 Hz, 6H); <sup>13</sup>C NMR (101 MHz, CDCl<sub>3</sub>) δ 163.41, 157.56, 130.64, 128.00, 127.12, 120.69, 110.36, 55.30, 49.64, 46.45, 39.65, 30.13, 20.92, 20.11. This compound was known. <sup>[5]</sup>



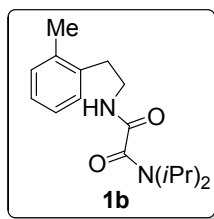

$^1\text{H}$  NMR (400 MHz,  $\text{CDCl}_3$ )  $\delta$  7.15–7.14 (m, 5H), 4.68–4.62 (m, 1H), 3.53–3.48 (m, 3H), 2.88–2.84 (m, 2H), 2.34 (s, 3H), 1.41 (d,  $J = 6.8$  Hz, 6H), 1.21 (d,  $J = 6.7$  Hz, 6H);  $^{13}\text{C}$  NMR (101 MHz,  $\text{CDCl}_3$ )  $\delta$  163.41, 163.28, 136.77, 136.46, 130.55, 129.36, 126.78, 126.24, 49.75, 46.58, 39.47, 32.98, 20.96, 20.15, 19.45. This compound was known. <sup>[5]</sup>

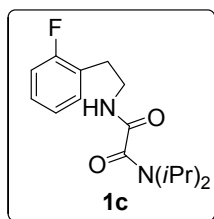

$^1\text{H}$  NMR (400 MHz,  $\text{CDCl}_3$ )  $\delta$  7.20–7.18 (m, 2H), 7.10–7.06 (m, 1H), 7.05–7.00 (m, 1H), 6.93 (br s, 1H), 4.67–4.60 (m, 1H), 3.58–3.53 (m, 2H), 3.51–3.46 (m, 1H), 2.90 (t,  $J = 7.1$  Hz, 2H), 1.40 (d,  $J = 6.8$  Hz, 6H), 1.22 (t,  $J = 11.6$  Hz, 6H);  $^{13}\text{C}$  NMR (101 MHz,  $\text{CDCl}_3$ )  $\delta$  163.49, 163.27, 161.40 (d,  $J_{\text{C}-\text{F}} = 244$  Hz), 131.18 (d,  $J_{\text{C}-\text{F}} = 5.0$  Hz), 128.47 (d,  $J_{\text{C}-\text{F}} = 8.0$  Hz), 125.63 (d,  $J_{\text{C}-\text{F}} = 16.0$  Hz), 124.30 (d,  $J_{\text{C}-\text{F}} = 4.0$  Hz), 115.48 (d,  $J_{\text{C}-\text{F}} = 22.0$  Hz), 49.76, 46.55, 39.38, 29.02 (d,  $J_{\text{C}-\text{F}} = 2.0$  Hz), 20.93, 20.15. This compound was known. <sup>[5]</sup>

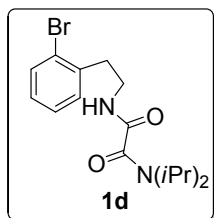

$^1\text{H}$  NMR (400 MHz,  $\text{CDCl}_3$ )  $\delta$  7.50 (d,  $J = 7.9$  Hz, 1H), 7.29 (br s, 1H), 7.26–7.20 (m, 2H), 7.07–7.03 (m, 1H), 4.55–4.52 (m, 1H), 3.57–3.52 (m, 2H), 3.49–3.42 (m, 1H), 2.98 (t,  $J = 7.2$  Hz, 2H), 1.37 (d,  $J = 6.8$  Hz, 6H), 1.17 (d,  $J = 6.7$  Hz, 6H);  $^{13}\text{C}$  NMR (101 MHz,  $\text{CDCl}_3$ )  $\delta$  163.49, 163.40, 138.04, 132.95, 130.97, 128.32, 127.65, 124.63, 49.73, 46.44, 38.96, 35.65, 20.87, 20.09. This compound was known. <sup>[5]</sup>

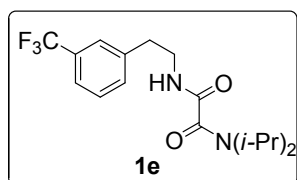

$^1\text{H}$  NMR (400 MHz,  $\text{CDCl}_3$ )  $\delta$  7.51–7.46 (m, 2H), 7.43 (t,  $J = 6.7$  Hz, 2H), 7.17 (br s, 1H), 4.63–4.57 (m, 1H), 3.60–3.55 (m, 2H), 3.53–3.46 (m, 1H), 2.93 (t,  $J = 7.2$  Hz, 2H), 1.40 (d,  $J = 6.8$  Hz, 6H), 1.19 (d,  $J = 6.7$  Hz, 6H);  $^{13}\text{C}$  NMR (101 MHz,  $\text{CDCl}_3$ )  $\delta$  163.58, 163.42, 139.68, 132.32, 130.98 (q,  $J_{\text{C}-\text{F}} =$

32 Hz), 129.14, 125.60 (q,  $J_{C-F} = 4$  Hz), 124.22 (q,  $J_{C-F} = 270$  Hz), 123.55 (q,  $J_{C-F} = 4$  Hz), 49.89, 46.58, 40.24, 35.33, 20.86, 20.12. This compound was known. <sup>[5]</sup>

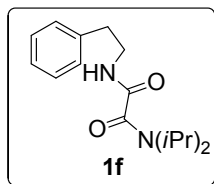

<sup>1</sup>H NMR (400 MHz, CDCl<sub>3</sub>)  $\delta$  7.32–7.27 (m, 2H), 7.23–7.20 (m, 3H), 7.11 (br s, 1H), 4.60–4.53 (m, 1H), 3.58–3.53 (m, 2H), 3.52–3.45 (m, 1H), 2.86 (t,  $J = 7.2$  Hz, 2H), 1.40 (d,  $J = 6.8$  Hz, 6H), 1.19 (d,  $J = 6.7$  Hz, 6H); <sup>13</sup>C NMR (101 MHz, CDCl<sub>3</sub>)  $\delta$  163.45, 163.41, 138.68, 128.85, 128.70, 126.62, 49.78, 46.52, 40.53, 35.55, 20.92, 20.16. This compound was known. <sup>[5]</sup>

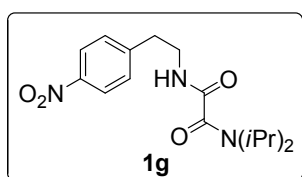

<sup>1</sup>H NMR (400 MHz, CDCl<sub>3</sub>)  $\delta$  8.18–8.16 (m, 2H), 7.40–7.38 (m, 2H), 7.14 (br s, 1H), 4.63–4.57 (m, 1H), 3.61–3.55 (m, 2H), 3.53–3.46 (m, 1H), 2.97 (t,  $J = 7.1$  Hz, 2H), 1.39 (d,  $J = 6.8$  Hz, 6H), 1.19 (d,  $J = 6.7$  Hz, 6H); <sup>13</sup>C NMR (101 MHz, CDCl<sub>3</sub>)  $\delta$  163.52, 163.16, 146.94, 146.53, 129.80, 123.92, 49.87, 46.64, 39.96, 35.47, 20.91, 20.13. This compound was known. <sup>[5]</sup>

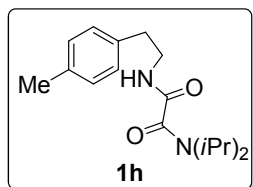

<sup>1</sup>H NMR (400 MHz, CDCl<sub>3</sub>)  $\delta$  7.12 (d,  $J = 8.6$  Hz, 4H), 6.95 (br s, 1H), 4.65–4.58 (m, 1H), 3.55–3.45 (m, 3H), 2.81 (t,  $J = 7.2$  Hz, 2H), 2.31 (s, 3H), 1.40 (d,  $J = 6.8$  Hz, 6H), 1.19 (d,  $J = 6.7$  Hz, 6H); <sup>13</sup>C NMR (101 MHz, CDCl<sub>3</sub>)  $\delta$  163.38, 163.26, 136.18, 135.53, 129.44, 128.74, 49.75, 46.58, 40.68, 35.14, 21.14, 20.96, 20.18. This compound was known. <sup>[5]</sup>

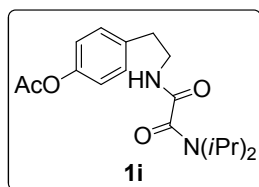

<sup>1</sup>H NMR (400 MHz, CDCl<sub>3</sub>)  $\delta$  7.21 (d,  $J = 8.4$  Hz, 3H), 6.99 (d,  $J = 8.4$  Hz, 2H), 4.52–4.47 (m, 1H), 3.54–3.49 (m, 2H), 3.48–3.43 (m, 1H), 2.82 (t,  $J = 7.2$  Hz, 2H), 2.26 (s, 3H), 1.38 (d,  $J = 6.8$  Hz, 6H), 1.17 (d,  $J = 6.6$  Hz, 6H); <sup>13</sup>C NMR (101 MHz, CDCl<sub>3</sub>)  $\delta$  169.58, 163.54, 163.52, 149.34, 136.26, 129.77, 121.69, 49.82, 46.42, 40.38, 34.88, 21.17, 20.85, 20.11. This compound was known. <sup>[5]</sup>

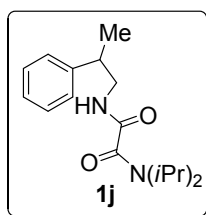

$^1\text{H NMR}$  (400 MHz,  $\text{CDCl}_3$ )  $\delta$  7.30 (t,  $J = 7.6$  Hz, 2H), 7.23–7.19 (m, 3H), 6.94 (br s, 1H), 4.42–4.37 (m, 1H), 3.54–3.39 (m, 3H), 3.03–2.94 (m, 1H), 1.38–1.35 (m, 6H), 1.28 (d,  $J = 7.0$  Hz, 3H), 1.16–1.12 (m, 6H);  $^{13}\text{C NMR}$  (101 MHz,  $\text{CDCl}_3$ )  $\delta$  163.54, 143.93, 128.72, 127.28, 126.77, 49.83, 46.40, 45.86, 39.78, 20.88, 20.16, 20.14, 19.45. This compound was known. <sup>[5]</sup>

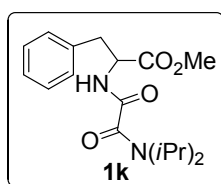

$^1\text{H NMR}$  (400 MHz,  $\text{CDCl}_3$ )  $\delta$  7.30–7.16 (m, 6H), 4.87–4.84 (m, 1H), 4.39–4.34 (m, 1H), 3.72 (s, 3H), 3.49–3.46 (m, 1H), 3.22–3.07 (m, 2H), 1.42–1.40 (m, 6H), 1.18–1.16 (m, 6H);  $^{13}\text{C NMR}$  (101 MHz,  $\text{CDCl}_3$ )  $\delta$  171.32, 162.95, 135.74, 129.34, 128.69, 127.21, 53.24, 52.52, 49.81, 46.50, 38.03, 20.90, 20.81, 20.10. This compound was known. <sup>[5]</sup>

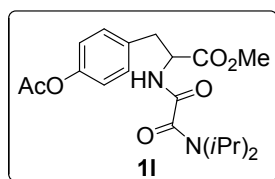

$^1\text{H NMR}$  (400 MHz,  $\text{CDCl}_3$ )  $\delta$  7.17 (d,  $J = 8.5$  Hz, 3H), 7.11 (br s, 1H), 7.04 – 7.00 (m, 2H), 4.86 – 4.81 (m, 1H), 4.47 – 4.41 (m, 1H), 3.71 (s, 3H), 3.53 – 3.45 (m, 1H), 3.17 (dd,  $J = 14.0, 5.8$  Hz, 1H), 3.08 (dd,  $J = 14.0, 6.7$  Hz, 1H), 2.27 (s, 4H), 1.41 (dd,  $J = 6.8, 2.7$  Hz, 7H), 1.18 (d,  $J = 6.6$  Hz, 7H);  $^{13}\text{C NMR}$  (101 MHz,  $\text{CDCl}_3$ )  $\delta$  171.17, 169.47, 162.94, 162.53, 149.95, 133.37, 130.41, 121.86, 53.25, 52.60, 49.83, 46.63, 37.55, 21.25, 20.94, 20.90, 20.17; HRMS (ESI-TOF)  $m/z$   $[\text{M}-\text{H}^+]$  Calcd for  $\text{C}_{20}\text{H}_{27}\text{N}_2\text{O}_6$ : 391.1869; Found: 391.1865.

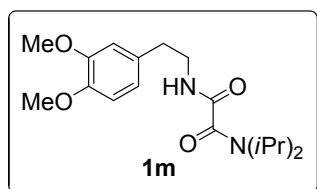

$^1\text{H NMR}$  (400 MHz,  $\text{CDCl}_3$ )  $\delta$  7.03 (br s, 1H), 6.81–6.78 (m, 1H), 6.74 (dd,  $J = 5.9, 1.8$  Hz, 2H), 4.61–4.54 (m, 1H), 3.85 (d,  $J = 9.5$  Hz, 6H), 3.54–3.44 (m, 3H), 2.78 (t,  $J = 7.1$  Hz, 2H), 1.38 (d,  $J = 6.8$  Hz, 6H), 1.18 (d,  $J = 6.7$  Hz, 6H);  $^{13}\text{C NMR}$  (101 MHz,  $\text{CDCl}_3$ )  $\delta$  163.41, 163.29, 149.09, 147.80, 131.16, 120.77, 112.02, 111.45, 56.00, 55.94, 49.76, 46.54, 40.60, 35.16, 20.91, 20.14. This compound was known. <sup>[4]</sup>

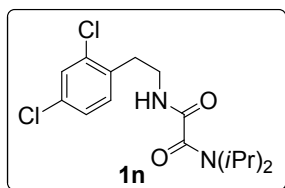

$^1\text{H NMR}$  (400 MHz,  $\text{CDCl}_3$ )  $\delta$  7.37 (br s, 1H), 7.28 (s, 1H), 7.22–7.17 (m, 2H), 4.57–4.52 (m, 1H), 3.57–3.52 (m, 2H), 3.51–3.46 (m, 1H), 2.97 (t,  $J = 7.1$  Hz, 2H), 1.40 (d,  $J = 6.8$  Hz, 6H), 1.20 (d,  $J = 6.7$  Hz, 6H);  $^{13}\text{C NMR}$  (101 MHz,  $\text{CDCl}_3$ )  $\delta$  163.52, 163.26, 134.99, 134.92, 133.12, 131.82, 129.45, 127.29, 49.81, 46.55, 38.71, 32.76, 20.90, 20.12. This compound was known. <sup>[5]</sup>

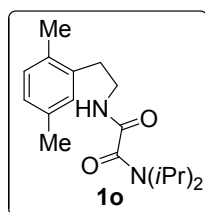

$^1\text{H NMR}$  (400 MHz,  $\text{CDCl}_3$ )  $\delta$  7.31 (br s, 1H), 7.04 (d,  $J = 7.6$  Hz, 1H), 7.00–6.90 (m, 2H), 4.64 (m, 1H), 3.60–3.35 (m, 3H), 2.92–2.71 (m, 2H), 2.29 (d,  $J = 4.9$  Hz, 6H), 1.41 (d,  $J = 6.8$  Hz, 6H), 1.22 (d,  $J = 6.7$  Hz, 6H);  $^{13}\text{C NMR}$  (101 MHz,  $\text{CDCl}_3$ )  $\delta$  163.55, 163.46, 136.54, 135.46, 133.16, 130.30, 130.05, 127.30, 53.51, 49.73, 46.40, 39.48, 32.85, 20.89, 20.82, 20.05, 18.83. This compound was known. <sup>[5]</sup>

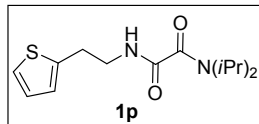

$^1\text{H NMR}$  (400 MHz,  $\text{CDCl}_3$ )  $\delta$  7.29 (br s, 1H), 7.13 (d,  $J = 4.9$  Hz, 1H), 6.93 – 6.90 (m, 1H), 6.85 (s, 1H), 4.59 – 4.52 (m, 1H), 3.55 (dd,  $J = 13.1, 6.6$  Hz, 2H), 3.51 – 3.44 (m, 1H), 3.06 (t,  $J = 6.8$  Hz, 2H), 1.39 (d,  $J = 6.8$  Hz, 6H), 1.19 (d,  $J = 6.6$  Hz, 6H);  $^{13}\text{C NMR}$  (101 MHz,  $\text{CDCl}_3$ )  $\delta$  163.50, 163.42, 140.98, 127.09, 125.47, 123.95, 49.81, 46.47, 40.69, 29.63, 20.88, 20.13; HRMS (ESI-TOF)  $m/z$   $[\text{M}+\text{Na}]^+$  Calcd for  $\text{C}_{14}\text{H}_{22}\text{N}_2\text{O}_2\text{SNa}$ : 305.1300; found: 305.1299.

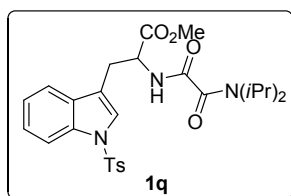

$^1\text{H NMR}$  (400 MHz,  $\text{CDCl}_3$ )  $\delta$  7.95 (d,  $J = 8.2$  Hz, 1H), 7.76 (d,  $J = 8.4$  Hz, 2H), 7.48 (d,  $J = 7.7$  Hz, 1H), 7.43 (s, 1H), 7.33–7.27 (m, 2H), 7.25–7.19 (m, 3H), 4.87 (m,  $J = 8.0, 6.1$  Hz, 1H), 4.56 (m,  $J = 13.3, 6.7$  Hz, 1H), 3.62 (s, 3H), 3.50 (m,  $J = 13.6, 6.8$  Hz, 1H), 3.24 (t,  $J = 6.4$  Hz, 2H), 2.33 (s, 3H), 1.42 (dd,  $J = 6.8, 3.1$  Hz, 6H), 1.19 (t,  $J = 6.4$  Hz, 6H);  $^{13}\text{C NMR}$  (101 MHz,  $\text{CDCl}_3$ )  $\delta$  171.19, 162.95, 162.27, 145.01, 135.23, 135.16, 130.67, 130.02, 127.01, 125.04, 124.71, 123.39, 119.45, 116.85, 113.83, 52.68, 52.27, 49.84, 46.73, 27.73, 21.71, 20.94, 20.92, 20.17; HRMS (ESI-TOF)  $m/z$   $[\text{M}+\text{Na}]^+$  Calcd for  $\text{C}_{27}\text{H}_{33}\text{N}_3\text{O}_6\text{S}$ : 550.1988; Found: 550.1997.

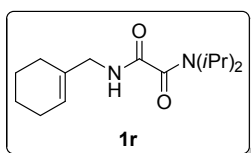

$^1\text{H}$  NMR (400 MHz,  $\text{CDCl}_3$ )  $\delta$  6.81 (br s, 1H), 5.48 (s, 1H), 4.70 (m, 1H), 3.50 (m, 1H), 3.35 (m, 2H), 2.16 (t,  $J = 6.8$  Hz, 2H), 1.97 (m, 4H), 1.65-1.58 (m, 2H), 1.57-1.50 (m, 2H), 1.41 (d,  $J = 6.8$  Hz, 6H), 1.22 (d,  $J = 6.7$  Hz, 6H);  $^{13}\text{C}$  NMR (101 MHz,  $\text{CDCl}_3$ )  $\delta$  163.32, 163.27, 134.38, 123.73, 49.77, 46.60, 37.52, 37.36, 28.10, 25.36, 22.94, 22.44, 21.01, 20.22; HRMS (ESI-TOF)  $m/z$   $[\text{M}+\text{Na}^+]$  Calcd for  $\text{C}_{15}\text{H}_{26}\text{N}_2\text{NaO}_2$ : 289.1892; Found: 289.1901.

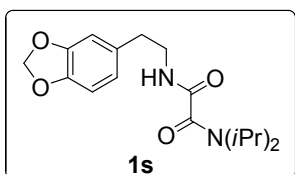

$^1\text{H}$  NMR (400 MHz,  $\text{CDCl}_3$ )  $\delta$  7.08 (br s, 1H), 6.73 (d,  $J = 7.9$  Hz, 1H), 6.69 (d,  $J = 1.4$  Hz, 1H), 6.65 (dd,  $J = 7.9, 1.6$  Hz, 1H), 5.91 (s, 2H), 4.62-4.55 (m, 1H), 3.51-3.44 (m, 3H), 2.76 (t,  $J = 7.1$  Hz, 2H), 1.39 (d,  $J = 6.8$  Hz, 6H), 1.19 (d,  $J = 6.7$  Hz, 6H);  $^{13}\text{C}$  NMR (101 MHz,  $\text{CDCl}_3$ )  $\delta$  163.41, 163.33, 147.87, 146.30, 132.39, 121.77, 109.18, 108.46, 100.99, 49.79, 46.54, 40.73, 35.24, 20.92, 20.15. This compound was known. <sup>[4]</sup>

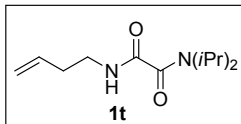

$^1\text{H}$  NMR (400 MHz,  $\text{CDCl}_3$ )  $\delta$  7.01 (br s, 1H), 5.82 - 5.71 (m, 1H), 5.15 - 5.06 (m, 2H), 4.72 - 4.67 (m, 1H), 3.51 - 3.46 (m, 1H), 3.35 (dd,  $J = 12.9, 6.7$  Hz, 2H), 2.33 - 2.26 (m, 2H), 1.40 (d,  $J = 6.8$  Hz, 6H), 1.21 (d,  $J = 6.7$  Hz, 6H);  $^{13}\text{C}$  NMR (101 MHz,  $\text{CDCl}_3$ )  $\delta$  163.43, 134.99, 117.39, 49.76, 46.53, 38.46, 33.48, 20.92, 20.16; HRMS (ESI-TOF)  $m/z$   $[\text{M}+\text{Na}]^+$  Calcd for  $\text{C}_{12}\text{H}_{22}\text{N}_2\text{O}_2\text{Na}$ : 249.1579; found: 249.1580.

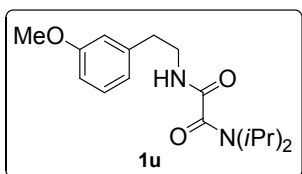

$^1\text{H}$  NMR (400 MHz,  $\text{CDCl}_3$ )  $\delta$  7.22-7.18 (m, 1H), 7.10 (br s, 1H), 6.80 (d,  $J = 7.7$  Hz, 1H), 6.77-6.75 (m, 2H), 4.58-4.52 (m, 1H), 3.78 (s, 3H), 3.56-3.51 (m, 2H), 3.49-3.44 (m, 1H), 2.82 (t,  $J = 7.2$  Hz, 2H), 1.39 (d,  $J = 6.8$  Hz, 6H), 1.18 (d,  $J = 6.7$  Hz, 6H);  $^{13}\text{C}$  NMR (101 MHz,  $\text{CDCl}_3$ )  $\delta$  163.46, 159.87, 140.22, 129.68, 121.15, 114.36, 112.18, 55.25, 49.80, 46.50, 40.39, 35.57, 20.90, 20.14. This compound was known. <sup>[5]</sup>

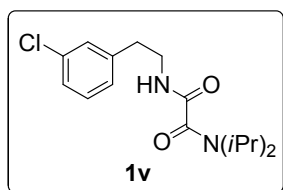

$^1\text{H}$  NMR (400 MHz,  $\text{CDCl}_3$ )  $\delta$  7.23 (d,  $J = 7.6$  Hz, 1H), 7.21–7.17 (m, 3H), 7.10 (d,  $J = 7.0$  Hz, 1H), 4.53–4.46 (m, 1H), 3.56–3.50 (m, 2H), 3.49–3.44 (m, 1H), 2.83 (t,  $J = 7.2$  Hz, 2H), 1.38 (d,  $J = 6.8$  Hz, 6H), 1.18 (d,  $J = 6.7$  Hz, 6H);  $^{13}\text{C}$  NMR (101 MHz,  $\text{CDCl}_3$ )  $\delta$  163.55, 163.45, 140.75, 134.40, 129.94, 128.99, 127.07, 126.83, 49.90, 46.54, 40.21, 35.16, 20.91, 20.15. This compound was known. <sup>[5]</sup>

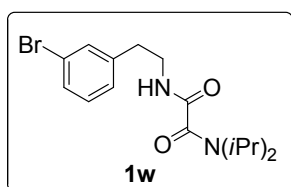

$^1\text{H}$  NMR (400 MHz,  $\text{CDCl}_3$ )  $\delta$  7.45 (br s, 1H), 7.38 (s, 1H), 7.35–7.34 (m, 1H), 7.16 (d,  $J = 4.6$  Hz, 2H), 4.46–4.41 (m, 1H), 3.57–3.52 (m, 2H), 3.50–3.44 (m, 1H), 2.84 (t,  $J = 7.2$  Hz, 2H), 1.39 (d,  $J = 6.8$  Hz, 6H), 1.19 (d,  $J = 6.7$  Hz, 6H);  $^{13}\text{C}$  NMR (101 MHz,  $\text{CDCl}_3$ )  $\delta$  163.65, 163.61, 141.08, 131.85, 130.15, 129.66, 127.49, 122.58, 49.93, 46.40, 40.11, 35.03, 20.85, 20.11. This compound was known. <sup>[5]</sup>

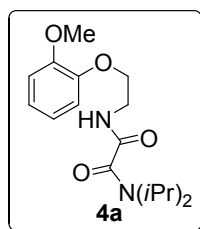

$^1\text{H}$  NMR (400 MHz,  $\text{CDCl}_3$ )  $\delta$  7.48 (br s, 1H), 6.98–6.87 (m, 4H), 4.67–4.61 (m, 1H), 4.13–4.10 (m, 2H), 3.86 (s, 3H), 3.70–3.66 (m, 2H), 3.53–3.46 (m, 1H), 1.42 (d,  $J = 6.6$  Hz, 6H), 1.21 (d,  $J = 6.4$  Hz, 6H);  $^{13}\text{C}$  NMR (101 MHz,  $\text{CDCl}_3$ )  $\delta$  184.72, 171.32, 162.95, 135.74, 129.34, 128.69, 127.21, 53.24, 52.52, 49.81, 46.50, 38.03, 20.90, 20.81, 20.10. This compound was known. <sup>[5]</sup>

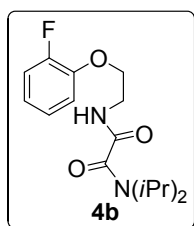

$^1\text{H}$  NMR (400 MHz,  $\text{CDCl}_3$ )  $\delta$  7.32 (br s, 1H), 7.11 – 7.01 (m, 2H), 7.09–7.02 (m, 2H), 4.68–4.64 (m, 1H), 4.14 (t,  $J = 5.2$  Hz, 2H), 3.74–3.70 (m, 2H), 3.54–3.47 (m, 1H), 1.41 (d,  $J = 6.8$  Hz, 6H), 1.22 (d,  $J = 6.7$  Hz, 6H);  $^{13}\text{C}$  NMR (101 MHz,  $\text{CDCl}_3$ )  $\delta$  163.66, 162.91, 152.92 (d,  $J_{\text{C-F}} = 244$  Hz), 146.65 (d,  $J_{\text{C-F}} = 10$  Hz), 124.50 (d,  $J_{\text{C-F}} = 4$  Hz), 121.98 (d,  $J_{\text{C-F}} = 7$  Hz), 116.49 (d,  $J_{\text{C-F}} = 18$  Hz), 115.56, 68.04, 49.85, 46.67, 38.89, 20.95, 20.16. This compound was known. <sup>[5]</sup>

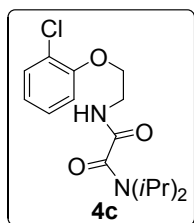

$^1\text{H}$  NMR (400 MHz,  $\text{CDCl}_3$ )  $\delta$  7.35 (dd,  $J = 8.2, 1.6$  Hz, 1H), 7.30 (br s, 1H), 7.22–7.18 (m, 1H), 6.93–6.89 (m, 2H), 4.69–4.66 (m, 1H), 4.13 (t,  $J = 5.2$  Hz, 2H), 3.77–3.73 (m, 2H), 3.52–3.49 (m, 1H), 1.42 (d,  $J = 6.8$  Hz, 6H), 1.22 (d,  $J = 6.7$  Hz, 6H);  $^{13}\text{C}$  NMR (101 MHz,  $\text{CDCl}_3$ )  $\delta$  163.63, 162.87, 154.07, 130.51, 127.92, 123.35, 122.22, 114.04, 67.80, 49.81, 46.69, 38.81, 20.98, 20.17. This compound was known. <sup>[5]</sup>

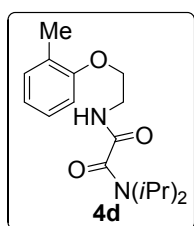

$^1\text{H}$  NMR (400 MHz,  $\text{CDCl}_3$ )  $\delta$  7.38 (br s, 1H), 7.14 (t,  $J = 6.7$  Hz, 2H), 6.87 (t,  $J = 7.4$  Hz, 1H), 6.79 (d,  $J = 8.4$  Hz, 1H), 4.78–4.74 (m, 1H), 4.07 (t,  $J = 5.2$  Hz, 2H), 3.74–3.70 (m, 2H), 3.53–3.49 (m, 1H), 2.23 (s, 3H), 1.42 (d,  $J = 6.8$  Hz, 6H), 1.22 (d,  $J = 6.7$  Hz, 6H);  $^{13}\text{C}$  NMR (101 MHz,  $\text{CDCl}_3$ )  $\delta$  163.39, 162.78, 156.58, 130.90, 126.93, 120.98, 111.08, 66.39, 49.73, 46.71, 39.07, 20.97, 20.15, 16.37. This compound was known. <sup>[5]</sup>

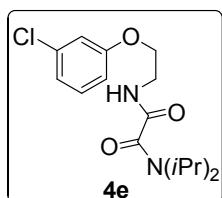

$^1\text{H}$  NMR (400 MHz,  $\text{CDCl}_3$ )  $\delta$  7.51 (br s, 1H), 7.17 (t,  $J = 8.1$  Hz, 1H), 6.92 (d,  $J = 7.9$  Hz, 1H), 6.86 (s, 1H), 6.76 (d,  $J = 8.1$  Hz, 1H), 4.69–4.62 (m, 1H), 4.03 (t,  $J = 5.2$  Hz, 2H), 3.69–3.65 (m, 2H), 3.52–3.45 (m, 1H), 1.39 (d,  $J = 6.8$  Hz, 6H), 1.20 (d,  $J = 6.7$  Hz, 6H);  $^{13}\text{C}$  NMR (101 MHz,  $\text{CDCl}_3$ )  $\delta$  163.51, 162.94, 159.17, 134.94, 130.36, 121.37, 115.01, 112.95, 66.47, 49.81, 46.62, 38.72, 20.90, 20.11. This compound was known. <sup>[5]</sup>

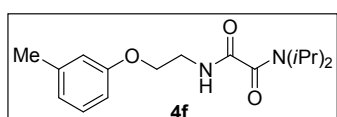

$^1\text{H}$  NMR (400 MHz,  $\text{CDCl}_3$ )  $\delta$  7.43 (br s, 1H), 7.14 (t,  $J = 7.8$  Hz, 1H), 6.76 (d,  $J = 7.5$  Hz, 1H), 6.71 (s, 1H), 6.68 (d,  $J = 8.2$  Hz, 1H), 4.71 – 4.67 (m, 1H), 4.04 (t,  $J = 5.2$  Hz, 2H), 3.68 (dd,  $J = 10.9, 5.5$  Hz, 2H), 3.53 – 3.46 (m, 1H), 2.31 (s, 3H), 1.41 (d,  $J = 6.8$  Hz, 6H), 1.21 (d,  $J = 6.7$  Hz, 6H);  $^{13}\text{C}$  NMR (101 MHz,  $\text{CDCl}_3$ )  $\delta$  163.50, 162.99, 158.46, 139.61, 129.30, 122.03, 115.43, 111.38, 66.10, 49.74, 46.59, 38.90, 21.56, 20.90, 20.12; HRMS (ESI-TOF)  $m/z$   $[\text{M}+\text{Na}]^+$  Calcd for  $\text{C}_{17}\text{H}_{25}\text{N}_2\text{O}_3\text{Na}$ : 329.1841; found: 329.1838.

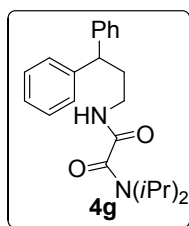

$^1\text{H}$  NMR (400 MHz,  $\text{CDCl}_3$ )  $\delta$  7.31–7.23 (m, 8H), 7.18 (t,  $J$  = 6.9 Hz, 2H), 6.96 (br s, 1H), 4.80–4.74 (m, 1H), 3.99 (t,  $J$  = 7.9 Hz, 1H), 3.54–3.48 (m, 1H), 3.26–3.21 (m, 2H), 2.36–2.30 (m, 2H), 1.42 (d,  $J$  = 6.8 Hz, 6H), 1.22 (d,  $J$  = 6.7 Hz, 6H);  $^{13}\text{C}$  NMR (101 MHz,  $\text{CDCl}_3$ )  $\delta$  163.28, 163.16, 144.06, 128.70, 127.83, 126.51, 49.71, 48.89, 46.61, 38.22, 34.83, 20.97, 20.17. This compound was known. <sup>[5]</sup>

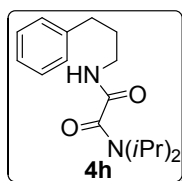

$^1\text{H}$  NMR (400 MHz,  $\text{CDCl}_3$ )  $\delta$  7.32–7.28 (m, 2H), 7.22–7.19 (m, 3H), 7.12 (br s, 1H), 4.79–4.73 (m, 1H), 3.55–3.50 (m, 1H), 3.36–3.31 (m, 2H), 2.71–2.67 (m, 2H), 1.94–1.87 (m, 2H), 1.44 (d,  $J$  = 6.8 Hz, 6H), 1.25 (d,  $J$  = 6.7 Hz, 6H);  $^{13}\text{C}$  NMR (101 MHz,  $\text{CDCl}_3$ )  $\delta$  163.36, 163.26, 141.32, 128.57, 128.49, 126.13, 49.77, 46.67, 39.03, 33.28, 30.92, 20.98, 20.19. This compound was known. <sup>[5]</sup>

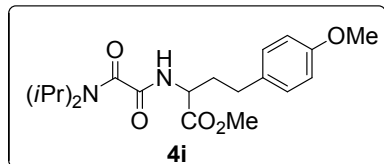

$^1\text{H}$  NMR (400 MHz,  $\text{CDCl}_3$ )  $\delta$  7.33 (d,  $J$  = 7.9 Hz, 1H), 7.08 (d,  $J$  = 8.4 Hz, 2H), 6.81 (d,  $J$  = 8.5 Hz, 2H), 4.68–4.62 (m, 1H), 4.59–4.54 (m, 1H), 3.74 (d,  $J$  = 20.0 Hz, 6H), 3.55–3.48 (m, 1H), 2.63 (t,  $J$  = 7.9 Hz, 2H), 2.23–2.14 (m, 1H), 2.07–1.98 (m, 1H), 1.43 (d,  $J$  = 6.8 Hz, 6H), 1.23 (dd,  $J$  = 6.4, 4.1 Hz, 6H);  $^{13}\text{C}$  NMR (101 MHz,  $\text{CDCl}_3$ )  $\delta$  172.02, 163.15, 162.61, 158.15, 132.48, 129.47, 114.01, 55.34, 52.56, 51.98, 49.79, 46.68, 34.01, 30.82, 20.97, 20.94, 20.22, 20.14; HRMS (ESI-TOF)  $m/z$   $[\text{M}+\text{H}^+]$  Calcd for  $\text{C}_{20}\text{H}_{31}\text{N}_2\text{O}_5$ : 379.2233; Found: 379.2230.

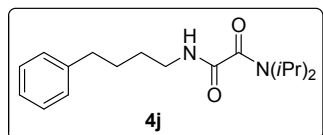

$^1\text{H}$  NMR (400 MHz,  $\text{CDCl}_3$ )  $\delta$  7.26 (t,  $J$  = 7.4 Hz, 2H), 7.17 (dd,  $J$  = 10.4, 4.5 Hz, 3H), 4.68 (br s, 1H), 3.53 – 3.46 (m, 1H), 3.29 (dd,  $J$  = 13.1, 6.8 Hz, 2H), 2.63 (t,  $J$  = 7.5 Hz, 2H), 1.71 – 1.63 (m, 2H), 1.62 – 1.54 (m, 2H), 1.41 (d,  $J$  = 6.8 Hz, 6H), 1.21 (d,  $J$  = 6.7 Hz, 6H);  $^{13}\text{C}$  NMR (101 MHz,  $\text{CDCl}_3$ )  $\delta$  163.38, 142.11, 128.47, 128.39, 125.87, 49.75, 46.54, 39.18, 35.51, 28.87, 28.73, 20.91, 20.15; HRMS (ESI-TOF)  $m/z$   $[\text{M}+\text{H}^+]$  Calcd for  $\text{C}_{18}\text{H}_{29}\text{N}_2\text{O}_2$ : 305.2229; Found: 305.2231.



#### 4. Optimization of Reaction Conditions<sup>a</sup>

**Table 1S** Optimization of Reaction Conditions

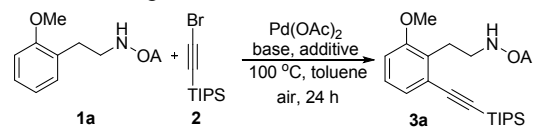

| entry | Pd(OAc) <sub>2</sub><br>(mol %) | base                            | additive<br>(equiv)    | Yield<br>(%)         |
|-------|---------------------------------|---------------------------------|------------------------|----------------------|
| 1     | 5                               | –                               | AgOAc (2), PivOH (0.3) | 67                   |
| 2     | 5                               | LiOAc                           | –                      | 4                    |
| 3     | 5                               | NaOAc                           | –                      | 31                   |
| 4     | 5                               | KOAc                            | –                      | 62                   |
| 5     | 5                               | CsOAc                           | –                      | 93(85 <sup>b</sup> ) |
| 6     | 5                               | Na <sub>2</sub> CO <sub>3</sub> | –                      | 22                   |
| 7     | 5                               | K <sub>2</sub> CO <sub>3</sub>  | –                      | 36                   |
| 8     | 5                               | KHCO <sub>3</sub>               | –                      | 56                   |
| 9     | 5                               | Na <sub>2</sub> CO <sub>3</sub> | PivOH (0.3)            | 47                   |
| 10    | 5                               | K <sub>2</sub> CO <sub>3</sub>  | PivOH (0.3)            | 36                   |
| 11    | 5                               | CsOAc                           | PivOH (0.3)            | 51                   |
| 12    | –                               | CsOAc                           | –                      | NR                   |

<sup>a</sup>Reaction conditions: **1a** (0.1 mmol), **2** (0.12 mmol), Pd(OAc)<sub>2</sub> (5 mol %), base (2 equiv), toluene (0.5 mL), 100 °C, air, 24 h. Yield was based on LC using acetophenone as the internal standard. <sup>b</sup>Isolated yield at 0.2 mmol scale.

#### 5. *ortho*-Alkyneylation of $\beta$ -Arylethamine Derivatives

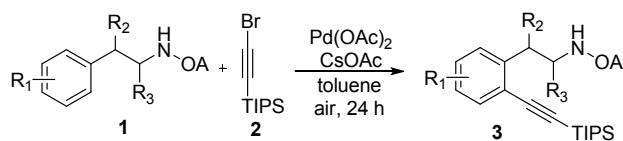

A mixture of **1** (0.2 mmol, 1.0 equiv), **2** (0.24 mmol, 1.2 equiv), Pd(OAc)<sub>2</sub> (1.1 mg, 0.05 equiv), CsOAc (76.8 mg, 2 equiv), toluene (0.5 mL) in a 15 mL glass vial (sealed with PTFE cap) was heated at 80 °C for 24 hours. The reaction mixture was cooled to rt, and concentrated in vacuo. The resulting residue was purified by column chromatography on silica gel to give the alkyneylation product.

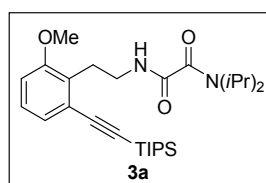

<sup>1</sup>H NMR (400 MHz, CDCl<sub>3</sub>)  $\delta$  7.14 (br s, 1H), 7.11 (d,  $J$  = 7.8 Hz, 1H), 7.10 – 7.07 (m, 1H), 6.83 (d,  $J$  = 7.6 Hz, 1H), 4.64 – 4.57 (m, 1H), 3.83 (s, 3H), 3.53 (dd,  $J$  = 12.2, 6.2 Hz, 2H), 3.48 – 3.42 (m, 1H), 3.15 (t,  $J$  = 6.6 Hz, 2H), 1.39 (d,  $J$  = 6.8 Hz, 6H), 1.15 (d,  $J$  = 6.7 Hz, 6H), 1.12 (s, 18H), 1.10 – 1.04 (m, 3H); <sup>13</sup>C NMR (101 MHz, CDCl<sub>3</sub>)  $\delta$  163.26, 163.14, 157.56, 129.75, 127.42, 125.30, 124.75, 110.88, 105.09, 94.78, 55.63, 49.45, 46.43, 39.60, 27.41, 20.92, 20.08, 18.77, 11.39; HRMS (ESI-TOF)  $m/z$  [M+Na]<sup>+</sup> Calcd for C<sub>28</sub>H<sub>46</sub>N<sub>2</sub>O<sub>3</sub>SiNa: 509.3175; found: 509.3177.

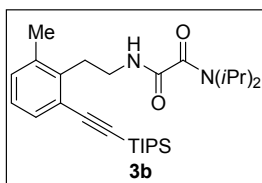

$^1\text{H}$  NMR (400 MHz,  $\text{CDCl}_3$ )  $\delta$  7.34 (d,  $J = 7.1$  Hz, 1H), 7.12 (d,  $J = 7.2$  Hz, 1H), 7.06 (t,  $J = 7.6$  Hz, 1H), 6.92 (br s, 1H), 4.68 – 4.62 (m, 1H), 3.55 (dd,  $J = 14.4, 6.6$  Hz, 2H), 3.52 – 3.45 (m, 1H), 3.14 (t,  $J = 7.4$  Hz, 2H), 2.38 (s, 3H), 1.41 (d,  $J = 6.8$  Hz, 6H), 1.20 (d,  $J = 6.7$  Hz, 6H), 1.13 (s, 18H), 1.12 – 1.06 (m, 3H);  $^{13}\text{C}$  NMR (101 MHz,  $\text{CDCl}_3$ )  $\delta$  163.34, 163.02, 138.99, 137.16, 131.04, 130.94, 126.39, 123.81, 106.03, 94.24, 49.59, 46.59, 38.97, 31.20, 20.99, 20.14, 19.93, 18.83, 11.46; HRMS (ESI-TOF)  $m/z$   $[\text{M}+\text{Na}]^+$  Calcd for  $\text{C}_{28}\text{H}_{46}\text{N}_2\text{O}_2\text{SiNa}$ : 493.3226; found: 493.3217.

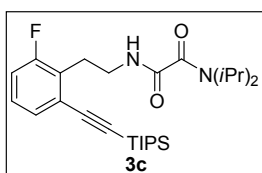

$^1\text{H}$  NMR (400 MHz,  $\text{CDCl}_3$ )  $\delta$  7.29 (d,  $J = 7.1$  Hz, 1H), 7.17 – 7.12 (m, 1H), 7.01 (t,  $J = 8.6$  Hz, 1H), 6.90 (br s, 1H), 4.64 – 4.57 (m, 1H), 3.63 – 3.58 (m, 2H), 3.51 – 3.44 (m, 1H), 3.13 (t,  $J = 6.3$  Hz, 2H), 1.40 (d,  $J = 6.8$  Hz, 6H), 1.19 (d,  $J = 6.7$  Hz, 6H), 1.13 (d,  $J = 2.8$  Hz, 18H), 1.10 (dd,  $J = 9.8, 4.9$  Hz, 3H);  $^{13}\text{C}$  NMR (101 MHz,  $\text{CDCl}_3$ )  $\delta$  163.34, 163.08, 161.30 (d,  $J_{\text{C}-\text{F}} = 244$  Hz), 128.86, 128.06 (d,  $J_{\text{C}-\text{F}} = 17$  Hz), 127.86 (d,  $J_{\text{C}-\text{F}} = 9$  Hz), 125.61 (d,  $J_{\text{C}-\text{F}} = 5$  Hz), 115.85 (d,  $J_{\text{C}-\text{F}} = 23$  Hz), 103.87 (d,  $J_{\text{C}-\text{F}} = 4$  Hz), 96.13, 49.60, 46.49, 38.88, 27.23, 20.90, 20.11, 18.75, 11.35;  $^{19}\text{F}$  NMR (376 MHz,  $\text{CDCl}_3$ )  $\delta$  -116.66; HRMS (ESI-TOF)  $m/z$   $[\text{M}+\text{Na}]^+$  Calcd for  $\text{C}_{27}\text{H}_{43}\text{FN}_2\text{O}_2\text{SiNa}$ : 497.2976; found: 497.2972.

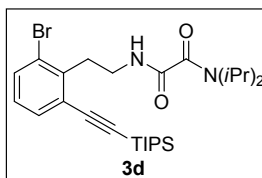

$^1\text{H}$  NMR (400 MHz,  $\text{CDCl}_3$ )  $\delta$  7.49 (d,  $J = 8.0$  Hz, 1H), 7.43 (dd,  $J = 7.4, 3.4$  Hz, 1H), 7.02 (d,  $J = 7.7$  Hz, 1H), 6.97 (br s, 1H), 4.70 – 4.64 (m, 1H), 3.62 (dd,  $J = 13.4, 6.9$  Hz, 2H), 3.50 – 3.44 (m, 1H), 3.29 (dd,  $J = 9.1, 5.1$  Hz, 2H), 1.39 (d,  $J = 6.8$  Hz, 6H), 1.18 (d,  $J = 6.7$  Hz, 6H), 1.16 – 1.11 (m, 18H), 1.08 (dd,  $J = 11.0, 3.5$  Hz, 3H);  $^{13}\text{C}$  NMR (101 MHz,  $\text{CDCl}_3$ )  $\delta$  163.09, 162.86, 140.18, 133.28, 132.42, 127.83, 125.53, 125.18, 104.48, 96.30, 49.50, 46.59, 38.58, 34.36, 20.97, 20.13, 18.78, 11.37; HRMS (ESI-TOF)  $m/z$   $[\text{M}+\text{Na}]^+$  Calcd for  $\text{C}_{27}\text{H}_{43}\text{BrN}_2\text{O}_2\text{SiNa}$ : 557.2175; found: 557.2161.

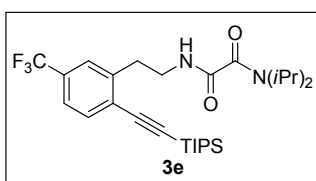

$^1\text{H}$  NMR (400 MHz,  $\text{CDCl}_3$ )  $\delta$  7.57 (d,  $J = 8.0$  Hz, 1H), 7.46 (s, 1H), 7.42 (d,  $J = 8.0$  Hz, 1H), 7.11 (br s, 1H), 4.67 – 4.60 (m, 1H), 3.64 – 3.59 (m, 2H), 3.51 – 3.44 (m, 1H), 3.11 (dd,  $J = 8.9, 5.1$  Hz, 2H),

1.38 (d,  $J = 6.8$  Hz, 6H), 1.18 (d,  $J = 6.7$  Hz, 6H), 1.13 (t,  $J = 3.7$  Hz, 18H), 1.09 (dd,  $J = 11.0, 3.4$  Hz, 3H);  $^{13}\text{C}$  NMR (101 MHz,  $\text{CDCl}_3$ )  $\delta$  163.37, 162.93, 141.69, 133.44, 130.26 (q,  $J_{\text{C-F}} = 32$  Hz), 127.60, 126.19 (d,  $J_{\text{C-F}} = 3$  Hz), 123.91 (q,  $J_{\text{C-F}} = 271$  Hz), 123.41 (d,  $J_{\text{C-F}} = 3$  Hz), 103.74, 98.22, 49.70, 46.61, 39.28, 34.30, 20.86, 20.06, 18.74, 11.34;  $^{19}\text{F}$  NMR (376 MHz,  $\text{CDCl}_3$ )  $\delta$  -62.75; HRMS (ESI-TOF)  $m/z$   $[\text{M}+\text{Na}]^+$  Calcd for  $\text{C}_{28}\text{H}_{43}\text{F}_3\text{N}_2\text{O}_2\text{SiNa}$ : 547.2944; found: 547.2948.

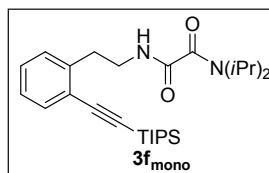

$^1\text{H}$  NMR (400 MHz,  $\text{CDCl}_3$ )  $\delta$  7.48 (d,  $J = 7.3$  Hz, 1H), 7.26 (dd,  $J = 7.6, 6.0$  Hz, 1H), 7.22 (d,  $J = 6.1$  Hz, 1H), 7.20 – 7.16 (m, 1H), 6.82 (br s, 1H), 4.63 – 4.57 (m, 1H), 3.64 – 3.59 (m, 2H), 3.52 – 3.45 (m, 1H), 3.06 (t,  $J = 6.9$  Hz, 2H), 1.40 (d,  $J = 6.8$  Hz, 6H), 1.20 (d,  $J = 6.7$  Hz, 6H), 1.13 (s, 18H), 1.07 (dd,  $J = 13.0, 7.9$  Hz, 3H);  $^{13}\text{C}$  NMR (101 MHz,  $\text{CDCl}_3$ )  $\delta$  163.42, 163.21, 140.81, 133.22, 129.54, 128.80, 126.65, 123.32, 105.21, 95.04, 49.76, 46.58, 39.56, 34.40, 20.98, 20.16, 18.83, 11.43; HRMS (ESI-TOF)  $m/z$   $[\text{M}+\text{Na}]^+$  Calcd for  $\text{C}_{27}\text{H}_{44}\text{N}_2\text{O}_2\text{SiNa}$ : 479.3070; found: 479.3063.

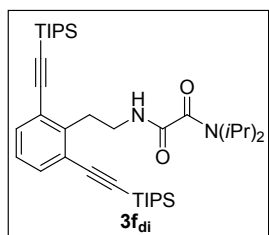

$^1\text{H}$  NMR (400 MHz,  $\text{CDCl}_3$ )  $\delta$  7.43 (d,  $J = 7.7$  Hz, 2H), 7.12 (t,  $J = 7.7$  Hz, 1H), 6.88 (br s, 1H), 4.61 – 4.53 (m, 1H), 3.65 (dd,  $J = 12.8, 7.1$  Hz, 2H), 3.48 – 3.42 (m, 1H), 3.34 (dd,  $J = 9.3, 5.0$  Hz, 2H), 1.38 (d,  $J = 6.8$  Hz, 6H), 1.16 (s, 6H), 1.12 (d,  $J = 2.5$  Hz, 36H), 1.11 – 1.06 (m, 6H);  $^{13}\text{C}$  NMR (101 MHz,  $\text{CDCl}_3$ )  $\delta$  162.94, 162.86, 142.74, 133.17, 126.45, 124.09, 104.77, 95.48, 49.45, 46.52, 39.30, 32.61, 20.99, 20.17, 18.83, 11.43; HRMS (ESI-TOF)  $m/z$   $[\text{M}+\text{Na}]^+$  Calcd for  $\text{C}_{38}\text{H}_{64}\text{N}_2\text{O}_2\text{SiNa}$ : 659.4404; found: 659.4410.

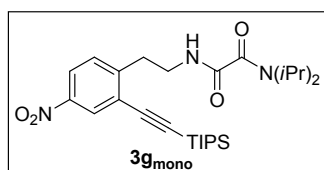

$^1\text{H}$  NMR (400 MHz,  $\text{CDCl}_3$ )  $\delta$  8.28 (d,  $J = 2.4$  Hz, 1H), 8.08 (dd,  $J = 8.4, 2.4$  Hz, 1H), 7.40 (d,  $J = 8.5$  Hz, 1H), 7.02 (br s, 1H), 4.63 – 4.56 (m, 1H), 3.65 – 3.60 (m, 2H), 3.52 – 3.45 (m, 1H), 3.15 (dd,  $J = 8.7, 4.8$  Hz, 2H), 1.38 (d,  $J = 6.8$  Hz, 6H), 1.19 (d,  $J = 6.7$  Hz, 6H), 1.16 – 1.12 (m, 18H), 1.12 – 1.06 (m, 3H);  $^{13}\text{C}$  NMR (101 MHz,  $\text{CDCl}_3$ )  $\delta$  163.42, 162.82, 148.16, 146.67, 130.53, 127.81, 124.86, 123.23, 102.62, 98.61, 49.71, 46.65, 38.97, 34.53, 20.94, 20.12, 18.77, 11.33; HRMS (ESI-TOF)  $m/z$   $[\text{M}+\text{Na}]^+$  Calcd for  $\text{C}_{27}\text{H}_{43}\text{N}_3\text{O}_4\text{SiNa}$ : 524.2921; found: 524.2914.

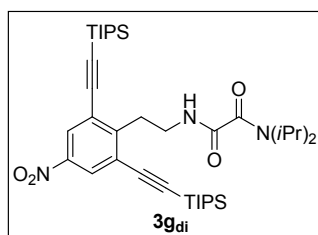

<sup>1</sup>H NMR (400 MHz, CDCl<sub>3</sub>) δ 8.22 (s, 2H), 6.95 (br s, 1H), 4.62 – 4.55 (m, 1H), 3.67 (dd, *J* = 13.1, 6.9 Hz, 2H), 3.47 (dd, *J* = 13.6, 6.8 Hz, 1H), 3.43 – 3.38 (m, 2H), 1.38 (d, *J* = 6.8 Hz, 6H), 1.16 (s, 6H), 1.15 – 1.12 (m, 36H), 1.12 – 1.06 (m, 6H); <sup>13</sup>C NMR (101 MHz, CDCl<sub>3</sub>) δ 162.82, 162.36, 149.62, 146.24, 127.10, 125.70, 102.46, 99.04, 49.43, 46.68, 38.65, 33.23, 20.96, 20.13, 18.81, 11.35; HRMS (ESI-TOF) *m/z* [M+Na]<sup>+</sup> Calcd for C<sub>38</sub>H<sub>63</sub>N<sub>3</sub>O<sub>4</sub>Si<sub>2</sub>Na: 704.4255; found: 704.4239.

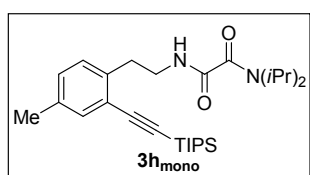

<sup>1</sup>H NMR (400 MHz, CDCl<sub>3</sub>) δ 7.29 (s, 1H), 7.11 (d, *J* = 7.8 Hz, 1H), 7.08 – 7.05 (m, 1H), 6.80 (br s, 1H), 4.63 – 4.56 (m, 1H), 3.61 – 3.56 (m, 2H), 3.51 – 3.44 (m, 1H), 3.01 (t, *J* = 6.9 Hz, 2H), 2.28 (s, 3H), 1.39 (d, *J* = 6.8 Hz, 6H), 1.19 (d, *J* = 6.7 Hz, 6H), 1.13 (s, 18H), 1.07 (dd, *J* = 10.2, 5.3 Hz, 3H); <sup>13</sup>C NMR (101 MHz, CDCl<sub>3</sub>) δ 163.38, 163.20, 137.78, 136.25, 133.62, 129.69, 129.44, 123.07, 105.46, 94.48, 49.70, 46.55, 39.66, 33.92, 20.96, 20.85, 20.16, 18.82, 11.44; HRMS (ESI-TOF) *m/z* [M+Na]<sup>+</sup> Calcd for C<sub>28</sub>H<sub>46</sub>N<sub>2</sub>O<sub>2</sub>SiNa: 493.3226; found: 493.3226.

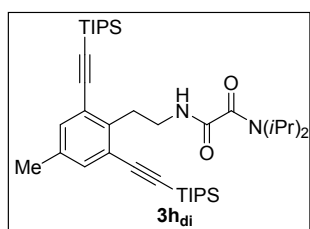

<sup>1</sup>H NMR (400 MHz, CDCl<sub>3</sub>) δ 7.26 (s, 2H), 6.87 (br s, 1H), 4.60 – 4.54 (m, 1H), 3.63 (dd, *J* = 12.7, 7.0 Hz, 2H), 3.49 – 3.42 (m, 1H), 3.30 (dd, *J* = 9.2, 5.0 Hz, 2H), 2.27 (s, 3H), 1.39 (d, *J* = 6.8 Hz, 6H), 1.16 (d, *J* = 6.7 Hz, 6H), 1.13 (d, *J* = 1.9 Hz, 36H), 1.11 – 1.06 (m, 6H); <sup>13</sup>C NMR (101 MHz, CDCl<sub>3</sub>) δ 162.95, 162.89, 139.85, 136.16, 133.84, 123.88, 105.01, 94.92, 49.46, 46.53, 39.42, 32.13, 20.99, 20.64, 20.18, 18.84, 11.44; HRMS (ESI-TOF) *m/z* [M+Na]<sup>+</sup> Calcd for C<sub>39</sub>H<sub>66</sub>N<sub>2</sub>O<sub>2</sub>Si<sub>2</sub>Na: 673.4561; found: 673.4559.

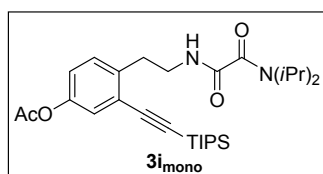

<sup>1</sup>H NMR (400 MHz, CDCl<sub>3</sub>) δ 7.23 (d, *J* = 8.3 Hz, 1H), 7.20 (d, *J* = 2.5 Hz, 1H), 6.99 (dd, *J* = 8.3, 2.5 Hz, 1H), 6.82 (br s, 1H), 4.63 – 4.57 (m, 1H), 3.61 – 3.56 (m, 2H), 3.51 – 3.44 (m, 1H), 3.03 (dd, *J* =

8.7, 5.0 Hz, 2H), 2.27 (s, 3H), 1.39 (d,  $J = 6.8$  Hz, 6H), 1.20 (d,  $J = 6.7$  Hz, 6H), 1.15 – 1.11 (m, 18H), 1.11 – 1.04 (m, 3H);  $^{13}\text{C}$  NMR (101 MHz,  $\text{CDCl}_3$ )  $\delta$  169.46, 163.46, 163.11, 149.07, 138.51, 130.53, 125.93, 124.51, 122.23, 104.18, 96.13, 49.73, 46.56, 39.47, 33.90, 21.16, 20.96, 20.16, 18.79, 11.38; HRMS (ESI-TOF)  $m/z$   $[\text{M}+\text{Na}]^+$  Calcd for  $\text{C}_{29}\text{H}_{46}\text{N}_2\text{O}_4\text{SiNa}$ : 537.3125; found: 537.3133.

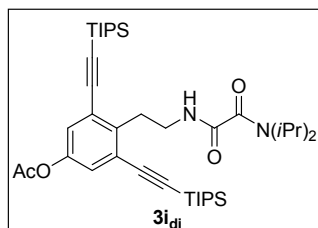

$^1\text{H}$  NMR (400 MHz,  $\text{CDCl}_3$ )  $\delta$  7.17 (d,  $J = 1.6$  Hz, 2H), 6.87 (br s, 1H), 4.65 – 4.54 (m, 1H), 3.63 (dd,  $J = 13.0, 7.0$  Hz, 2H), 3.49 – 3.42 (m, 1H), 3.30 (dd,  $J = 9.3, 5.1$  Hz, 2H), 2.27 (s, 3H), 1.39 (d,  $J = 6.8$  Hz, 6H), 1.16 (d,  $J = 6.7$  Hz, 6H), 1.11 (d,  $J = 3.0$  Hz, 36H), 1.07 (dd,  $J = 10.9, 3.5$  Hz, 6H);  $^{13}\text{C}$  NMR (101 MHz,  $\text{CDCl}_3$ )  $\delta$  169.22, 162.93, 162.80, 148.56, 140.54, 126.23, 125.25, 103.88, 96.57, 49.50, 46.54, 39.18, 32.28, 21.12, 20.96, 20.17, 18.82, 11.39; HRMS (ESI-TOF)  $m/z$   $[\text{M}+\text{Na}]^+$  Calcd for  $\text{C}_{42}\text{H}_{68}\text{N}_2\text{O}_6\text{Si}_2\text{Na}$ : 775.4514; found: 775.4530.

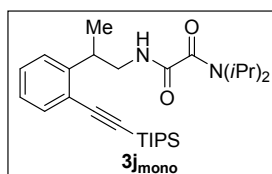

$^1\text{H}$  NMR (400 MHz,  $\text{CDCl}_3$ )  $\delta$  7.48 (dd,  $J = 7.7, 0.9$  Hz, 1H), 7.32 – 7.27 (m, 1H), 7.25 (dd,  $J = 7.6, 1.4$  Hz, 1H), 7.15 (td,  $J = 7.6, 1.6$  Hz, 1H), 6.60 (br s, 1H), 4.41 – 4.35 (m, 1H), 3.72 – 3.59 (m, 2H), 3.57 – 3.50 (m, 1H), 3.47 – 3.40 (m, 1H), 1.37 (dd,  $J = 6.8, 1.7$  Hz, 6H), 1.30 (d,  $J = 6.7$  Hz, 3H), 1.13 (d,  $J = 2.7$  Hz, 6H), 1.12 (d,  $J = 2.0$  Hz, 18H), 1.08 (d,  $J = 9.8$  Hz, 3H);  $^{13}\text{C}$  NMR (101 MHz,  $\text{CDCl}_3$ )  $\delta$  163.49, 163.41, 145.49, 133.46, 128.97, 126.40, 125.84, 123.26, 105.25, 95.45, 49.75, 46.43, 44.30, 37.35, 20.92, 20.86, 20.18, 20.13, 18.80, 18.64, 11.45; HRMS (ESI-TOF)  $m/z$   $[\text{M}+\text{Na}]^+$  Calcd for  $\text{C}_{28}\text{H}_{46}\text{N}_2\text{O}_2\text{SiNa}$ : 493.3226; found: 493.3221.

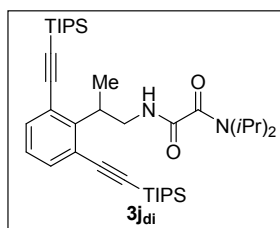

$^1\text{H}$  NMR (400 MHz,  $\text{CDCl}_3$ )  $\delta$  7.43 (d,  $J = 7.7$  Hz, 2H), 7.09 (t,  $J = 7.7$  Hz, 1H), 6.60 (br s, 1H), 4.57 – 4.50 (m, 1H), 4.21 – 4.13 (m, 1H), 4.08 – 3.99 (m, 1H), 3.85 – 3.78 (m, 1H), 3.46 – 3.40 (m, 1H), 1.50 (dd,  $J = 7.1, 2.7$  Hz, 3H), 1.36 (d,  $J = 6.8$  Hz, 6H), 1.15 (s, 6H), 1.12 (d,  $J = 2.9$  Hz, 36H), 1.09 – 0.99 (m, 6H);  $^{13}\text{C}$  NMR (101 MHz,  $\text{CDCl}_3$ )  $\delta$  163.28, 162.94, 146.54, 126.28, 49.65, 46.44, 42.92, 38.37, 20.96, 20.25, 20.16, 18.82, 17.03, 11.50; HRMS (ESI-TOF)  $m/z$   $[\text{M}+\text{Na}]^+$  Calcd for  $\text{C}_{39}\text{H}_{66}\text{N}_2\text{O}_2\text{Si}_2\text{Na}$ : 673.4561; found: 673.4562.

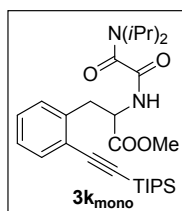

$^1\text{H}$  NMR (400 MHz,  $\text{CDCl}_3$ )  $\delta$  7.49 (d,  $J = 7.5$  Hz, 1H), 7.27 (d,  $J = 2.6$  Hz, 1H), 7.26 (br s, 1H), 7.24 – 7.20 (m, 1H), 7.18 (dd,  $J = 7.7, 3.6$  Hz, 1H), 1.41 – 1.37 (m, 6H), 1.14 (d,  $J = 2.7$  Hz, 18H), 1.12 (s, 6H), 1.11 – 1.08 (m, 3H);  $^{13}\text{C}$  NMR (101 MHz,  $\text{CDCl}_3$ )  $\delta$  171.48, 162.88, 162.47, 138.26, 133.18, 129.58, 128.68, 126.98, 123.85, 105.01, 95.55, 52.96, 52.51, 49.58, 46.51, 36.74, 20.98, 20.81, 20.17, 20.06, 18.80, 18.79, 11.41; HRMS (ESI-TOF)  $m/z$   $[\text{M}+\text{Na}]^+$  Calcd for  $\text{C}_{29}\text{H}_{46}\text{N}_2\text{O}_4\text{SiNa}$ : 537.3125; found: 537.3130.

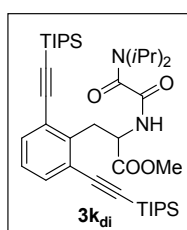

$^1\text{H}$  NMR (400 MHz,  $\text{CDCl}_3$ )  $\delta$  7.44 (d,  $J = 7.7$  Hz, 2H), 7.14 (d,  $J = 7.7$  Hz, 1H), 7.10 (d,  $J = 6.2$  Hz, 1H), 5.13 – 5.06 (m, 1H), 3.98 – 3.92 (m, 1H), 3.74 (d,  $J = 2.5$  Hz, 3H), 3.67 – 3.62 (m, 1H), 3.51 – 3.44 (m, 1H), 3.42 – 3.35 (m, 1H), 1.35 (dd,  $J = 6.8, 2.5$  Hz, 6H), 1.14 (t,  $J = 3.6$  Hz, 36H), 1.11 (d,  $J = 5.3$  Hz, 3H), 1.07 (d,  $J = 6.1$  Hz, 6H), 1.03 (d,  $J = 14.6$  Hz, 3H);  $^{13}\text{C}$  NMR (101 MHz,  $\text{CDCl}_3$ )  $\delta$  171.39, 163.23, 162.85, 140.31, 133.16, 126.79, 124.60, 104.54, 96.38, 52.43, 52.08, 49.51, 46.30, 35.31, 21.07, 20.79, 20.21, 20.02, 18.84, 18.83, 11.41; HRMS (ESI-TOF)  $m/z$   $[\text{M}+\text{Na}]^+$  Calcd for  $\text{C}_{40}\text{H}_{66}\text{N}_2\text{O}_4\text{Si}_2\text{Na}$ : 717.4459; found: 717.4469.

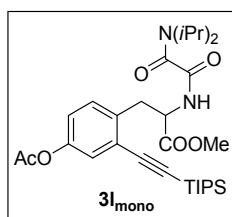

$^1\text{H}$  NMR (400 MHz,  $\text{CDCl}_3$ )  $\delta$  7.19 (d,  $J = 8.6$  Hz, 1H), 7.16 (br s, 1H), 7.13 (d,  $J = 2.4$  Hz, 1H), 4.82 – 4.72 (m, 1H), 4.26 – 4.19 (m, 1H), 3.64 (s, 3H), 3.43 – 3.29 (m, 2H), 3.18 – 3.08 (m, 1H), 2.20 (s, 3H), 1.32 (dd,  $J = 6.8, 2.9$  Hz, 6H), 1.08 (d,  $J = 6.2$  Hz, 6H), 1.06 (d,  $J = 3.1$  Hz, 18H), 1.01 (d,  $J = 8.8$  Hz, 3H);  $^{13}\text{C}$  NMR (101 MHz,  $\text{CDCl}_3$ )  $\delta$  171.35, 169.24, 162.90, 162.42, 149.34, 135.97, 130.58, 125.84, 125.01, 122.19, 103.97, 96.65, 52.85, 52.54, 49.66, 46.52, 36.23, 21.14, 20.89, 20.76, 20.17, 20.04, 18.76, 11.35; HRMS (ESI-TOF)  $m/z$   $[\text{M}+\text{Na}]^+$  Calcd for  $\text{C}_{31}\text{H}_{48}\text{N}_2\text{O}_6\text{SiNa}$ : 595.3179; found: 595.3187.

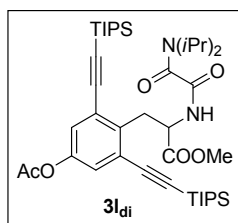

$^1\text{H}$  NMR (400 MHz,  $\text{CDCl}_3$ )  $\delta$  7.18 (d,  $J = 1.9$  Hz, 2H), 7.11 (d,  $J = 8.3$  Hz, 1H), 5.12 – 5.05 (m, 1H), 4.03 – 3.97 (m, 1H), 3.74 (d,  $J = 2.5$  Hz, 3H), 3.63 – 3.57 (m, 1H), 3.47 – 3.37 (m, 2H), 2.27 (s, 3H), 1.38 – 1.33 (m, 6H), 1.18 – 1.15 (m, 3H), 1.15 – 1.12 (m, 36H), 1.11 (d,  $J = 4.3$  Hz, 3H), 1.10 – 1.07 (m, 6H);  $^{13}\text{C}$  NMR (101 MHz,  $\text{CDCl}_3$ )  $\delta$  171.30, 169.05, 163.20, 162.77, 148.88, 138.11, 126.22, 125.75, 103.68, 97.44, 52.48, 51.97, 49.64, 46.32, 35.03, 21.13, 20.94, 20.71, 20.23, 20.00, 18.83, 18.82, 11.38; HRMS (ESI-TOF)  $m/z$   $[\text{M}+\text{Na}]^+$  Calcd for  $\text{C}_{42}\text{H}_{68}\text{N}_2\text{O}_6\text{Si}_2\text{Na}$ : 775.4514; found: 775.4530.

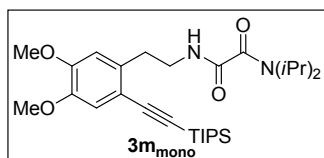

$^1\text{H}$  NMR (400 MHz,  $\text{CDCl}_3$ )  $\delta$  6.92 (s, 1H), 6.82 (br s, 1H), 6.74 (s, 1H), 4.68 – 4.61 (m, 1H), 3.89 (s, 3H), 3.86 (s, 3H), 3.59 – 3.54 (m, 2H), 3.51 – 3.44 (m, 1H), 3.00 (t,  $J = 6.8$  Hz, 2H), 1.39 (d,  $J = 6.8$  Hz, 6H), 1.19 (d,  $J = 6.7$  Hz, 6H), 1.13 (s, 18H), 1.12 – 1.06 (m, 3H);  $^{13}\text{C}$  NMR (101 MHz,  $\text{CDCl}_3$ )  $\delta$  163.42, 163.04, 149.64, 147.39, 134.46, 115.26, 114.93, 112.61, 105.41, 93.03, 56.14, 56.11, 49.65, 46.59, 39.72, 34.12, 20.98, 20.15, 18.86, 11.49; HRMS (ESI-TOF)  $m/z$   $[\text{M}+\text{Na}]^+$  Calcd for  $\text{C}_{29}\text{H}_{48}\text{N}_2\text{O}_4\text{SiNa}$ : 539.3281; found: 539.3272.

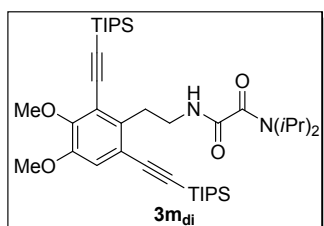

$^1\text{H}$  NMR (400 MHz,  $\text{CDCl}_3$ )  $\delta$  6.96 (s, 1H), 6.90 (br s, 1H), 4.68 – 4.61 (m, 1H), 3.89 (s, 3H), 3.85 (s, 3H), 3.60 (dd,  $J = 12.7, 7.0$  Hz, 2H), 3.49 – 3.43 (m, 1H), 3.25 (dd,  $J = 9.4, 4.9$  Hz, 2H), 1.39 (d,  $J = 6.8$  Hz, 6H), 1.16 (d,  $J = 6.7$  Hz, 6H), 1.14 (s, 18H), 1.12 (d,  $J = 2.4$  Hz, 18H), 1.10 – 0.99 (m, 6H);  $^{13}\text{C}$  NMR (101 MHz,  $\text{CDCl}_3$ )  $\delta$  162.92, 162.79, 151.97, 151.12, 136.48, 119.24, 119.20, 116.67, 104.80, 100.40, 100.36, 94.27, 61.07, 56.22, 49.47, 46.56, 39.44, 32.08, 31.08, 21.02, 20.19, 18.87, 18.83, 11.47; HRMS (ESI-TOF)  $m/z$   $[\text{M}+\text{Na}]^+$  Calcd for  $\text{C}_{40}\text{H}_{68}\text{N}_2\text{O}_4\text{Si}_2\text{Na}$ : 719.4615; found: 719.4611.

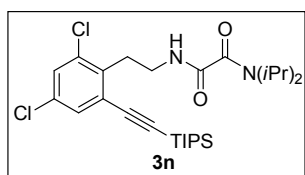

$^1\text{H}$  NMR (400 MHz,  $\text{CDCl}_3$ )  $\delta$  7.35 (d,  $J = 2.0$  Hz, 1H), 7.31 (br s, 1H), 7.04 (s, 1H), 4.64 – 4.57 (m, 1H), 3.60 – 3.55 (m, 2H), 3.49 – 3.42 (m, 1H), 3.20 (dd,  $J = 8.9, 5.0$  Hz, 2H), 1.37 (d,  $J = 6.8$  Hz, 6H), 1.16 (d,  $J = 6.7$  Hz, 6H), 1.10 (d,  $J = 3.7$  Hz, 18H), 1.09 – 1.04 (m, 3H);  $^{13}\text{C}$  NMR (101 MHz,  $\text{CDCl}_3$ )  $\delta$  163.30, 162.99, 139.01, 139.00, 134.11, 130.37, 127.63, 123.68, 104.51, 99.08, 49.58, 46.60, 39.00, 31.44, 21.34, 20.99, 20.14, 19.67, 18.85, 11.46; HRMS (ESI-TOF)  $m/z$   $[\text{M}+\text{Na}]^+$  Calcd for  $\text{C}_{27}\text{H}_{42}\text{Cl}_2\text{N}_2\text{O}_2\text{SiNa}$ : 547.2290; found: 547.2280.

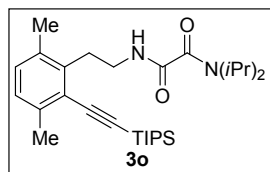

$^1\text{H}$  NMR (400 MHz,  $\text{CDCl}_3$ )  $\delta$  7.03 – 6.98 (m, 2H), 6.92 (br s, 1H), 4.75 – 4.66 (m, 1H), 3.58 – 3.52 (m, 2H), 3.48 (dd,  $J = 13.6, 6.8$  Hz, 1H), 3.18 – 3.12 (m, 2H), 2.42 (s, 3H), 2.34 (s, 3H), 1.41 (d,  $J = 6.8$  Hz, 6H), 1.20 (d,  $J = 6.7$  Hz, 6H), 1.14 (d,  $J = 1.8$  Hz, 18H), 1.13 – 1.07 (m, 3H);  $^{13}\text{C}$  NMR (101 MHz,  $\text{CDCl}_3$ )  $\delta$  163.04, 162.70, 137.17, 135.47, 132.49, 131.26, 129.53, 126.55, 102.97, 97.76, 49.44, 46.49, 38.23, 31.30, 20.81, 20.00, 18.65, 11.22; HRMS (ESI-TOF)  $m/z$   $[\text{M}+\text{Na}]^+$  Calcd for  $\text{C}_{29}\text{H}_{48}\text{N}_2\text{O}_2\text{SiNa}$ : 507.3383; found: 507.3375.

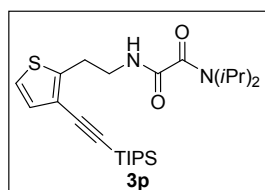

$^1\text{H}$  NMR (400 MHz,  $\text{CDCl}_3$ )  $\delta$  7.05 (d,  $J = 5.2$  Hz, 1H), 7.01 (d,  $J = 5.2$  Hz, 1H), 6.94 (br s, 1H), 4.70 – 4.63 (m, 1H), 3.63 – 3.58 (m, 2H), 3.53 – 3.46 (m, 1H), 3.17 (t,  $J = 6.8$  Hz, 2H), 1.41 (d,  $J = 6.8$  Hz, 6H), 1.21 (d,  $J = 6.7$  Hz, 6H), 1.11 (s, 18H), 1.08 – 1.04 (m, 3H);  $^{13}\text{C}$  NMR (101 MHz,  $\text{CDCl}_3$ )  $\delta$  163.39, 162.94, 144.90, 130.29, 122.83, 121.16, 100.89, 93.79, 49.73, 46.67, 39.94, 28.97, 21.01, 20.19, 18.83, 11.41; HRMS (ESI-TOF)  $m/z$   $[\text{M}+\text{Na}]^+$  Calcd for  $\text{C}_{25}\text{H}_{42}\text{N}_2\text{O}_2\text{SSiNa}$ : 485.2634; found: 485.2643.

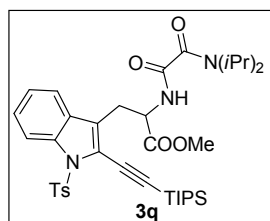

$^1\text{H}$  NMR (400 MHz,  $\text{CDCl}_3$ )  $\delta$  8.18 (d,  $J = 8.4$  Hz, 1H), 7.87 (d,  $J = 8.2$  Hz, 2H), 7.62 (d,  $J = 7.8$  Hz, 1H), 7.38 (d,  $J = 6.9$  Hz, 1H), 7.35 (br s, 1H), 7.28 (d,  $J = 7.6$  Hz, 1H), 7.19 (d,  $J = 8.1$  Hz, 2H), 4.79 – 4.73 (m, 1H), 4.44 – 4.37 (m, 1H), 3.49 (s, 3H), 3.45 (dd,  $J = 13.3, 6.5$  Hz, 1H), 3.26 (d,  $J = 7.5$  Hz, 2H), 2.33 (s, 3H), 1.41 (s, 6H), 1.20 (d,  $J = 4.9$  Hz, 18H), 1.15 (s, 3H), 1.11 (d,  $J = 5.0$  Hz, 6H);  $^{13}\text{C}$  NMR (101 MHz,  $\text{CDCl}_3$ )  $\delta$  =171.21, 162.77, 162.06, 144.91, 135.95, 129.85, 128.78, 127.14, 126.57, 125.86, 124.10, 119.96, 119.67, 114.81, 104.29, 95.32, 52.58, 52.09, 49.61, 46.65, 28.80, 21.71, 20.92,



20.18, 20.13, 18.81, 11.54; HRMS (ESI-TOF)  $m/z$   $[M+Na]^+$  Calcd for  $C_{36}H_{51}N_3O_4SSiNa$ : 672.3267; found: 672.3271.

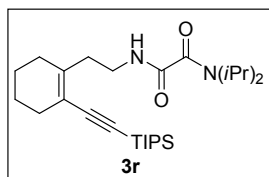

$^1H$  NMR (400 MHz,  $CDCl_3$ )  $\delta$  6.77 (br s, 1H), 4.67 – 4.60 (m, 1H), 3.48 (dd,  $J = 13.6, 6.8$  Hz, 1H), 3.41 (dd,  $J = 13.2, 6.9$  Hz, 2H), 2.54 (t,  $J = 7.0$  Hz, 2H), 2.16 (s, 2H), 2.10 (s, 2H), 1.61 – 1.54 (m, 4H), 1.39 (d,  $J = 6.8$  Hz, 6H), 1.20 (d,  $J = 6.7$  Hz, 6H), 1.05 (s, 18H), 1.04 – 0.93 (m, 3H);  $^{13}C$  NMR (101 MHz,  $CDCl_3$ )  $\delta$  =163.44, 163.25, 142.79, 117.81, 107.45, 92.48, 49.74, 46.53, 37.77, 35.80, 30.18, 29.35, 22.50, 22.35, 21.00, 20.17, 18.81, 11.41; HRMS (ESI-TOF)  $m/z$   $[M+Na]^+$  Calcd for  $C_{27}H_{48}N_2O_2SiNa$ : 483.3383; found: 483.3379.

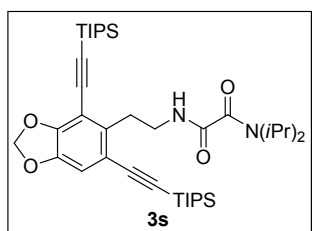

$^1H$  NMR (400 MHz,  $CDCl_3$ )  $\delta$  6.88 (br s, 1H), 6.86 (s, 1H), 6.02 (s, 2H), 4.68 – 4.60 (m, 1H), 3.60 (d,  $J = 5.7$  Hz, 2H), 3.50 – 3.43 (m, 1H), 3.25 (s, 2H), 1.39 (d,  $J = 6.8$  Hz, 6H), 1.17 (d,  $J = 6.7$  Hz, 6H), 1.12 (d,  $J = 3.0$  Hz, 18H), 1.11 (d,  $J = 1.8$  Hz, 18H), 1.08 (dd,  $J = 6.3, 4.6$  Hz, 6H);  $^{13}C$  NMR (101 MHz,  $CDCl_3$ )  $\delta$  162.94, 162.82, 150.37, 145.98, 137.35, 116.63, 112.25, 105.92, 105.03, 102.10, 100.30, 98.23, 93.53, 49.49, 46.56, 39.48, 32.06, 21.01, 20.19, 18.85, 18.82, 11.46, 11.39; HRMS (ESI-TOF)  $m/z$   $[M+Na]^+$  Calcd for  $C_{39}H_{64}N_2O_4Si_2Na$ : 703.4302; found: 703.4312.

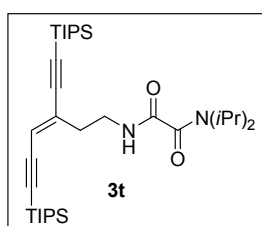

$^1H$  NMR (400 MHz,  $CDCl_3$ )  $\delta$  6.93 (br s, 1H), 6.00 (s, 1H), 4.78 – 4.71 (m, 1H), 3.55 (dd,  $J = 12.8, 6.5$  Hz, 2H), 3.48 (dd,  $J = 13.6, 6.8$  Hz, 1H), 2.68 (t,  $J = 6.7$  Hz, 2H), 1.40 (d,  $J = 6.8$  Hz, 6H), 1.20 (d,  $J = 6.7$  Hz, 6H), 1.06 (d,  $J = 1.2$  Hz, 36H), 1.05 – 0.99 (m, 6H);  $^{13}C$  NMR (101 MHz,  $CDCl_3$ )  $\delta$  163.06, 162.81, 133.13, 118.62, 106.61, 102.92, 102.79, 97.36, 49.57, 46.61, 37.75, 33.25, 20.97, 20.16, 18.73, 11.32, 11.30; HRMS (ESI-TOF)  $m/z$   $[M+Na]^+$  Calcd for  $C_{34}H_{62}N_2O_2Si_2Na$ : 609.4248; found: 609.4248.

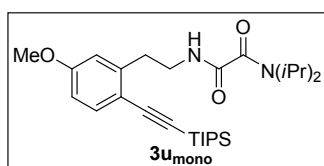

$^1\text{H}$  NMR (400 MHz,  $\text{CDCl}_3$ )  $\delta$  7.39 (d,  $J = 8.5$  Hz, 1H), 6.88 (br s, 1H), 6.75 (d,  $J = 2.3$  Hz, 1H), 6.69 (dd,  $J = 8.5, 2.3$  Hz, 1H), 4.63 – 4.56 (m, 1H), 3.78 (s, 3H), 3.62 – 3.54 (m, 2H), 3.50 – 3.43 (m, 1H), 3.02 (t,  $J = 6.8$  Hz, 2H), 1.38 (d,  $J = 6.8$  Hz, 6H), 1.18 (d,  $J = 6.7$  Hz, 6H), 1.12 (d,  $J = 7.6$  Hz, 18H), 1.09 – 1.04 (m, 3H);  $^{13}\text{C}$  NMR (101 MHz,  $\text{CDCl}_3$ )  $\delta$  163.42, 163.14, 159.81, 142.60, 134.43, 115.43, 114.79, 112.59, 105.31, 92.98, 55.37, 49.66, 46.49, 39.44, 34.56, 20.90, 20.11, 18.78, 11.43; HRMS (ESI-TOF)  $m/z$   $[\text{M}+\text{Na}]^+$  Calcd for  $\text{C}_{28}\text{H}_{46}\text{N}_2\text{O}_3\text{SiNa}$ : 509.3175; found: 509.3168.

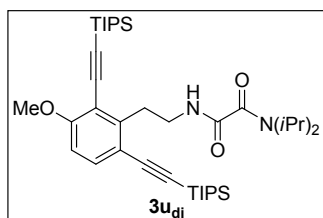

$^1\text{H}$  NMR (400 MHz,  $\text{CDCl}_3$ )  $\delta$  7.40 (d,  $J = 8.6$  Hz, 1H), 6.86 (br s, 1H), 6.69 (d,  $J = 8.7$  Hz, 1H), 4.64 – 4.54 (m, 1H), 3.84 (s, 3H), 3.64 (dd,  $J = 12.7, 7.1$  Hz, 2H), 3.49 – 3.42 (m, 1H), 3.32 (dd,  $J = 9.3, 5.1$  Hz, 2H), 1.39 (d,  $J = 6.8$  Hz, 6H), 1.15 (d,  $J = 6.7$  Hz, 6H), 1.13 (d,  $J = 1.7$  Hz, 18H), 1.12 (s, 18H), 1.10 – 0.94 (m, 6H);  $^{13}\text{C}$  NMR (101 MHz,  $\text{CDCl}_3$ )  $\delta$  162.98, 162.93, 161.36, 144.70, 134.03, 116.13, 113.61, 109.07, 104.96, 100.50, 100.45, 93.28, 56.08, 49.49, 46.51, 39.31, 32.71, 21.00, 20.20, 18.87, 18.84, 11.49; HRMS (ESI-TOF)  $m/z$   $[\text{M}+\text{Na}]^+$  Calcd for  $\text{C}_{39}\text{H}_{66}\text{N}_2\text{O}_3\text{Si}_2\text{Na}$ : 689.4510; found: 689.4503.

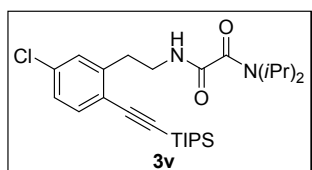

$^1\text{H}$  NMR (400 MHz,  $\text{CDCl}_3$ )  $\delta$  7.38 (dd,  $J = 8.2, 3.2$  Hz, 1H), 7.20 (d,  $J = 1.9$  Hz, 1H), 7.14 (dd,  $J = 8.2, 2.0$  Hz, 1H), 6.98 (br s, 1H), 4.64 – 4.57 (m, 1H), 3.62 – 3.57 (m, 2H), 3.51 – 3.44 (m, 1H), 3.02 (t,  $J = 6.9$  Hz, 2H), 1.39 (d,  $J = 6.8$  Hz, 6H), 1.20 (d,  $J = 6.7$  Hz, 6H), 1.11 (d,  $J = 2.2$  Hz, 18H), 1.10 – 1.04 (m, 3H);  $^{13}\text{C}$  NMR (101 MHz,  $\text{CDCl}_3$ )  $\delta$  163.42, 163.11, 142.69, 134.37, 134.20, 129.52, 126.83, 121.81, 104.05, 96.20, 49.75, 46.52, 39.27, 34.17, 20.92, 20.12, 18.75, 11.34; HRMS (ESI-TOF)  $m/z$   $[\text{M}+\text{Na}]^+$  Calcd for  $\text{C}_{27}\text{H}_{43}\text{ClN}_2\text{O}_2\text{SiNa}$ : 513.2680; found: 513.2669.

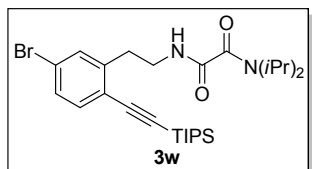

$^1\text{H}$  NMR (400 MHz,  $\text{CDCl}_3$ )  $\delta$  7.37 (d,  $J = 1.4$  Hz, 1H), 7.32 (d,  $J = 8.1$  Hz, 1H), 7.30 (d,  $J = 1.7$  Hz, 1H), 6.96 (br s, 1H), 4.66 – 4.59 (m, 1H), 3.61 – 3.56 (m, 2H), 3.52 – 3.45 (m, 1H), 3.02 (dd,  $J = 8.8, 5.2$  Hz, 2H), 1.39 (d,  $J = 6.8$  Hz, 6H), 1.20 (d,  $J = 6.7$  Hz, 6H), 1.11 (d,  $J = 2.5$  Hz, 18H), 1.07 (dd,  $J = 9.4, 5.1$  Hz, 3H);  $^{13}\text{C}$  NMR (101 MHz,  $\text{CDCl}_3$ )  $\delta$  163.40, 163.02, 142.86, 134.39, 132.42, 129.80, 122.69, 122.29, 104.11, 96.50, 49.74, 46.58, 39.33, 34.17, 20.98, 20.15, 18.77, 11.36; HRMS (ESI-TOF)  $m/z$   $[\text{M}+\text{Na}]^+$  Calcd for  $\text{C}_{28}\text{H}_{43}\text{BrN}_2\text{O}_2\text{SiNa}$ : 557.2175; found: 557.2158.

## 6. *ortho*-Alkynylation of $\gamma$ -Arylpropamine Derivatives

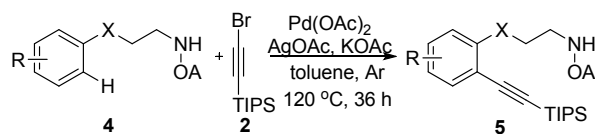

A mixture of **4** (0.2 mmol, 1.0 equiv), **2** (0.4 mmol, 2 equiv), Pd(OAc)<sub>2</sub> (1.1 mg, 0.05 equiv), AgOAc (66.8 mg, 2 equiv), KOAc (58.9 mg, 2 equiv), toluene (1 mL) in a 25 mL glass vial (purged with Ar, sealed with PTFE cap) was heated at 120 °C for 36 hours. The reaction mixture was cooled to rt, and concentrated in vacuo. The resulting residue was purified by column chromatography on silica gel to give the alkynylation product.

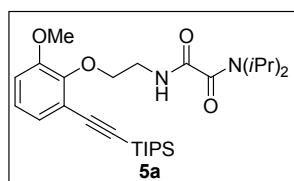

<sup>1</sup>H NMR (400 MHz, CDCl<sub>3</sub>)  $\delta$  7.83 (br s, 1H), 7.03 (dd,  $J = 7.8, 1.7$  Hz, 1H), 6.98 (t,  $J = 7.9$  Hz, 1H), 6.88 (dd,  $J = 8.0, 1.6$  Hz, 1H), 4.64 – 4.57 (m, 1H), 4.27 – 4.22 (m, 2H), 3.89 (s, 3H), 3.60 – 3.55 (m, 2H), 3.51 (dd,  $J = 13.6, 6.8$  Hz, 1H), 1.44 (d,  $J = 6.8$  Hz, 6H), 1.22 (d,  $J = 6.7$  Hz, 6H), 1.12 (d,  $J = 1.6$  Hz, 18H), 1.08 (dd,  $J = 8.0, 5.6$  Hz, 3H); <sup>13</sup>C NMR (101 MHz, CDCl<sub>3</sub>)  $\delta$  163.77, 163.42, 152.58, 149.19, 125.74, 124.39, 118.72, 112.74, 102.59, 95.90, 72.08, 56.05, 49.75, 46.43, 39.60, 20.98, 20.16, 18.76, 11.41; HRMS (ESI-TOF)  $m/z$  [M+Na]<sup>+</sup> Calcd for C<sub>28</sub>H<sub>46</sub>N<sub>2</sub>O<sub>4</sub>SiNa: 525.3125; found: 525.3124.

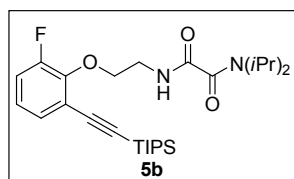

<sup>1</sup>H NMR (400 MHz, CDCl<sub>3</sub>)  $\delta$  7.29 (br s, 1H), 7.20 (d,  $J = 7.7$  Hz, 1H), 7.05 (dd,  $J = 13.8, 5.0$  Hz, 1H), 6.97 – 6.92 (m, 1H), 4.68 – 4.62 (m, 1H), 4.29 (t,  $J = 5.0$  Hz, 2H), 3.65 (dd,  $J = 10.7, 5.4$  Hz, 2H), 3.54 – 3.47 (m, 1H), 1.42 (d,  $J = 6.8$  Hz, 6H), 1.22 (d,  $J = 6.7$  Hz, 6H), 1.12 (d,  $J = 2.3$  Hz, 18H), 1.07 (t,  $J = 7.2$  Hz, 3H); <sup>13</sup>C NMR (101 MHz, CDCl<sub>3</sub>)  $\delta$  163.65, 162.95, 155.41 (d,  $J_{C-F} = 245$  Hz), 147.65 (d,  $J_{C-F} = 12$  Hz), 129.50 (d,  $J_{C-F} = 3$  Hz), 123.97 (d,  $J_{C-F} = 8$  Hz), 119.36, 117.29 (d,  $J_{C-F} = 19$  Hz), 101.68 (d,  $J_{C-F} = 4$  Hz), 97.02, 72.48 (d,  $J_{C-F} = 3$  Hz), 49.77, 46.59, 39.55, 20.94, 20.15, 18.76, 11.38; <sup>19</sup>F NMR (376 MHz, CDCl<sub>3</sub>)  $\delta$  -130.58; HRMS (ESI-TOF)  $m/z$  [M+Na]<sup>+</sup> Calcd for C<sub>27</sub>H<sub>43</sub>FN<sub>2</sub>O<sub>3</sub>SiNa: 513.2925; found: 513.2927.

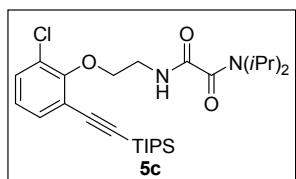

$^1\text{H}$  NMR (400 MHz,  $\text{CDCl}_3$ )  $\delta$  = 7.40 (br s, 1H), 7.36 – 7.31 (m, 2H), 6.98 (t,  $J$  = 7.9 Hz, 1H), 4.72 – 4.65 (m, 1H), 4.31 (t,  $J$  = 5.1 Hz, 2H), 3.68 (dd,  $J$  = 10.5, 5.5 Hz, 2H), 3.54 – 3.47 (m, 1H), 1.43 (d,  $J$  = 6.8 Hz, 6H), 1.22 (d,  $J$  = 6.7 Hz, 6H), 1.12 (d,  $J$  = 2.7 Hz, 18H), 1.11 – 1.06 (m, 3H);  $^{13}\text{C}$  NMR (101 MHz,  $\text{CDCl}_3$ )  $\delta$  = 163.59, 162.91, 155.69, 133.02, 130.72, 128.07, 124.69, 119.35, 101.94, 97.38, 72.06, 49.73, 46.61, 39.63, 21.01, 20.16, 18.78, 11.40; HRMS (ESI-TOF)  $m/z$   $[\text{M}+\text{Na}]^+$  Calcd for  $\text{C}_{27}\text{H}_{43}\text{ClN}_2\text{O}_3\text{SiNa}$ : 529.2629; found: 529.2625.

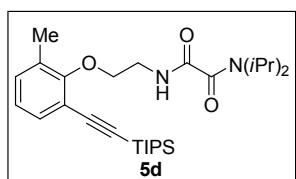

$^1\text{H}$  NMR (400 MHz,  $\text{CDCl}_3$ )  $\delta$  = 7.35 (br s, 1H), 7.29 (dd,  $J$  = 7.6, 1.3 Hz, 1H), 7.12 (dd,  $J$  = 7.5, 0.8 Hz, 1H), 6.93 (t,  $J$  = 7.6 Hz, 1H), 4.79 – 4.72 (m, 1H), 4.24 (t,  $J$  = 5.2 Hz, 2H), 3.68 (dd,  $J$  = 10.9, 5.5 Hz, 2H), 3.55 – 3.48 (m, 1H), 2.26 (s, 3H), 1.43 (d,  $J$  = 6.8 Hz, 6H), 1.23 (d,  $J$  = 6.7 Hz, 6H), 1.12 (s, 18H), 1.11 – 1.05 (m, 3H);  $^{13}\text{C}$  NMR (101 MHz,  $\text{CDCl}_3$ )  $\delta$  = 163.45, 162.77, 158.04, 132.44, 131.71, 131.25, 123.74, 116.92, 103.68, 95.37, 71.00, 49.68, 46.68, 39.88, 21.00, 20.15, 18.81, 16.41, 11.46; HRMS (ESI-TOF)  $m/z$   $[\text{M}+\text{Na}]^+$  Calcd for  $\text{C}_{28}\text{H}_{43}\text{N}_2\text{O}_3\text{SiNa}$ : 509.3175; found: 509.3176.

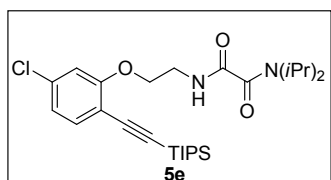

$^1\text{H}$  NMR (400 MHz,  $\text{CDCl}_3$ )  $\delta$  7.35 (d,  $J$  = 8.2 Hz, 1H), 7.21 (br s, 1H), 6.89 (dd,  $J$  = 8.2, 1.9 Hz, 1H), 6.81 (d,  $J$  = 1.8 Hz, 1H), 4.73 – 4.67 (m, 1H), 4.10 (t,  $J$  = 5.2 Hz, 2H), 3.72 (dd,  $J$  = 11.0, 5.5 Hz, 2H), 3.54 – 3.47 (m, 1H), 1.41 (d,  $J$  = 6.8 Hz, 6H), 1.22 (d,  $J$  = 6.7 Hz, 6H), 1.13 (s, 18H), 1.09 (dd,  $J$  = 9.3, 3.8 Hz, 3H);  $^{13}\text{C}$  NMR (101 MHz,  $\text{CDCl}_3$ )  $\delta$  163.57, 162.44, 159.99, 135.20, 134.59, 121.25, 112.70, 111.96, 101.84, 96.36, 67.44, 49.71, 46.73, 38.86, 21.00, 20.14, 18.84, 11.41; HRMS (ESI-TOF)  $m/z$   $[\text{M}+\text{Na}]^+$  Calcd for  $\text{C}_{27}\text{H}_{43}\text{ClN}_2\text{O}_3\text{SiNa}$ : 529.2629; found: 529.2619.

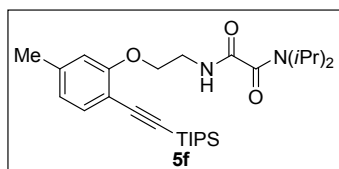

$^1\text{H}$  NMR (400 MHz,  $\text{CDCl}_3$ )  $\delta$  7.31 (d,  $J$  = 7.7 Hz, 1H), 7.18 (br s, 1H), 6.74 – 6.69 (m, 1H), 6.63 (s, 1H), 4.69 – 4.62 (m, 1H), 4.11 (t,  $J$  = 5.2 Hz, 2H), 3.72 (dd,  $J$  = 10.9, 5.5 Hz, 2H), 3.53 – 3.46 (m, 1H), 2.32 (s, 3H), 1.41 (d,  $J$  = 6.8 Hz, 6H), 1.21 (d,  $J$  = 6.7 Hz, 6H), 1.13 (s, 18H), 1.09 (dd,  $J$  = 7.1, 4.5 Hz,

3H);  $^{13}\text{C}$  NMR (101 MHz,  $\text{CDCl}_3$ )  $\delta$  163.67, 162.68, 159.44, 140.41, 133.80, 121.82, 113.05, 110.39, 103.23, 94.19, 67.15, 49.73, 46.64, 39.04, 21.97, 20.97, 20.13, 18.86, 11.46; HRMS (ESI-TOF)  $m/z$   $[\text{M}+\text{Na}]^+$  Calcd for  $\text{C}_{28}\text{H}_{46}\text{N}_2\text{O}_3\text{SiNa}$ : 509.3175; found: 509.3172.

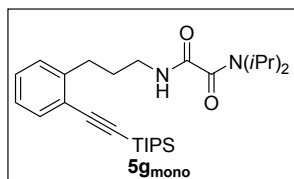

$^1\text{H}$  NMR (400 MHz,  $\text{CDCl}_3$ )  $\delta$  7.46 (d,  $J = 7.6$  Hz, 1H), 7.25 – 7.21 (m, 1H), 7.18 (d,  $J = 6.6$  Hz, 1H), 7.14 (dd,  $J = 11.7, 4.4$  Hz, 1H), 6.97 (br s, 1H), 4.81 – 4.70 (m, 1H), 3.54 – 3.47 (m, 1H), 3.31 (d,  $J = 6.8$  Hz, 2H), 2.91 – 2.81 (m, 2H), 1.92 (s, 2H), 1.42 (d,  $J = 6.8$  Hz, 6H), 1.22 (d,  $J = 6.8$  Hz, 6H), 1.13 (s, 18H), 1.08 (s, 3H);  $^{13}\text{C}$  NMR (101 MHz,  $\text{CDCl}_3$ )  $\delta$  163.24, 163.14, 143.55, 133.19, 128.96, 128.68, 126.12, 123.01, 105.51, 94.54, 49.74, 46.70, 39.19, 32.32, 30.02, 21.00, 20.19, 18.83, 11.45; HRMS (ESI-TOF)  $m/z$   $[\text{M}+\text{Na}]^+$  Calcd for  $\text{C}_{28}\text{H}_{46}\text{N}_2\text{O}_2\text{SiNa}$ : 493.3226; found: 493.3227.

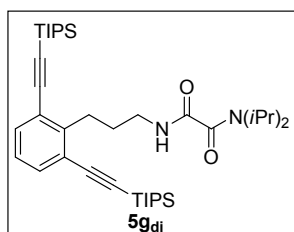

$^1\text{H}$  NMR (400 MHz,  $\text{CDCl}_3$ )  $\delta$  7.42 (d,  $J = 7.7$  Hz, 1H), 7.09 (t,  $J = 7.7$  Hz, 1H), 6.76 (br s, 1H), 4.79 – 4.72 (m, 1H), 3.53 – 3.46 (m, 1H), 3.35 (dd,  $J = 15.3, 6.0$  Hz, 1H), 3.18 – 3.08 (m, 1H), 1.98 – 1.88 (m, 1H), 1.41 (d,  $J = 6.8$  Hz, 3H), 1.21 (d,  $J = 6.7$  Hz, 3H), 1.13 (d,  $J = 2.4$  Hz, 18H), 1.09 (d,  $J = 2.4$  Hz, 3H);  $^{13}\text{C}$  NMR (101 MHz,  $\text{CDCl}_3$ )  $\delta$  162.90, 145.75, 133.29, 125.97, 123.60, 105.08, 94.97, 49.59, 46.64, 39.60, 31.12, 29.70, 21.01, 20.21, 18.84, 11.44; HRMS (ESI-TOF)  $m/z$   $[\text{M}+\text{Na}]^+$  Calcd for  $\text{C}_{39}\text{H}_{66}\text{N}_2\text{O}_2\text{Si}_2\text{Na}$ : 673.4561; found: 673.4563.

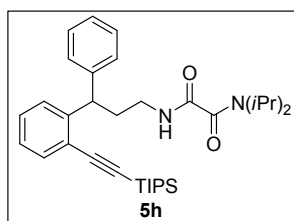

$^1\text{H}$  NMR (400 MHz,  $\text{CDCl}_3$ )  $\delta$  =7.47 (d,  $J = 7.6$  Hz, 1H), 7.33 (d,  $J = 7.4$  Hz, 2H), 7.27 (d,  $J = 7.2$  Hz, 2H), 7.25 (s, 1H), 7.23 (d,  $J = 6.5$  Hz, 1H), 7.16 (dd,  $J = 11.0, 3.6$  Hz, 1H), 7.14 – 7.10 (m, 1H), 6.97 (br s, 1H), 4.80 – 4.68 (m, 2H), 3.52 – 3.45 (m, 1H), 3.33 – 3.17 (m, 2H), 2.41 – 2.29 (m, 2H), 1.40 (d,  $J = 6.8$  Hz, 6H), 1.21 (d,  $J = 6.6$  Hz, 6H), 1.16 (s, 18H), 1.11 (d,  $J = 10.2$  Hz, 3H);  $^{13}\text{C}$  NMR (101 MHz,  $\text{CDCl}_3$ )  $\delta$  =163.09, 162.89, 146.05, 143.47, 133.54, 129.03, 128.60, 127.92, 126.77, 126.50, 126.22, 123.17, 105.87, 95.38, 49.57, 46.66, 46.14, 38.60, 34.94, 20.98, 20.14, 18.87, 11.49; HRMS (ESI-TOF)  $m/z$   $[\text{M}+\text{Na}]^+$  Calcd for  $\text{C}_{34}\text{H}_{50}\text{N}_2\text{O}_2\text{SiNa}$ : 569.3539; found: 569.3532.

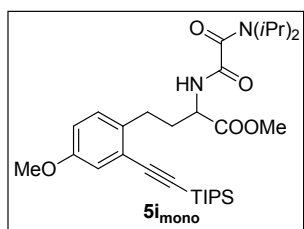

<sup>1</sup>H NMR (400 MHz, CDCl<sub>3</sub>) δ = 7.22 (d, *J* = 8.2 Hz, 1H), 7.10 (d, *J* = 8.5 Hz, 1H), 6.98 (d, *J* = 2.7 Hz, 1H), 6.80 (dd, *J* = 8.5, 2.8 Hz, 1H), 4.72 – 4.66 (m, 1H), 4.54 – 4.48 (m, 1H), 3.77 (s, 3H), 3.68 (s, 3H), 3.55 – 3.48 (m, 1H), 2.88 – 2.79 (m, 2H), 2.35 – 2.27 (m, 1H), 2.06 – 1.97 (m, 1H), 1.44 (d, *J* = 6.8 Hz, 6H), 1.23 (d, *J* = 6.6 Hz, 6H), 1.13 (d, *J* = 1.5 Hz, 18H), 1.08 (dd, *J* = 9.4, 5.0 Hz, 3H); <sup>13</sup>C NMR (101 MHz, CDCl<sub>3</sub>) δ = 172.12, 163.17, 162.45, 157.82, 134.88, 130.26, 123.80, 117.99, 115.11, 105.30, 94.67, 55.50, 52.47, 52.00, 49.73, 46.73, 32.81, 30.18, 21.00, 20.98, 20.22, 20.16, 18.83, 11.43; HRMS (ESI-TOF) *m/z* [M+Na]<sup>+</sup> Calcd for C<sub>31</sub>H<sub>50</sub>N<sub>2</sub>O<sub>5</sub>SiNa: 581.3387; found: 581.3381.

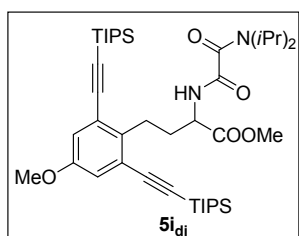

<sup>1</sup>H NMR (400 MHz, CDCl<sub>3</sub>) δ 7.05 (d, *J* = 8.1 Hz, 1H), 6.96 (d, *J* = 1.8 Hz, 2H), 4.75 – 4.68 (m, 1H), 4.63 – 4.56 (m, 1H), 3.78 (s, 3H), 3.69 (s, 3H), 3.54 – 3.47 (m, 1H), 3.17 – 3.02 (m, 2H), 2.18 – 2.10 (m, 1H), 2.06 – 1.99 (m, 1H), 1.42 (dd, *J* = 6.8, 4.3 Hz, 6H), 1.22 (dd, *J* = 8.1, 6.8 Hz, 6H), 1.16 – 1.13 (m, 36H), 1.13 – 1.07 (m, 6H); <sup>13</sup>C NMR (101 MHz, CDCl<sub>3</sub>) δ 171.95, 163.23, 162.18, 157.21, 137.32, 124.40, 119.14, 104.88, 95.02, 55.65, 53.11, 52.35, 49.57, 46.69, 32.34, 29.73, 21.05, 21.02, 20.22, 20.18, 18.89, 11.42; HRMS (ESI-TOF) *m/z* [M+Na]<sup>+</sup> Calcd for C<sub>42</sub>H<sub>70</sub>N<sub>2</sub>O<sub>5</sub>Si<sub>2</sub>Na: 761.4721; found: 761.4721.

## 7. Gram Scale Reaction

**Scheme 1S** Gram Scale Reaction.

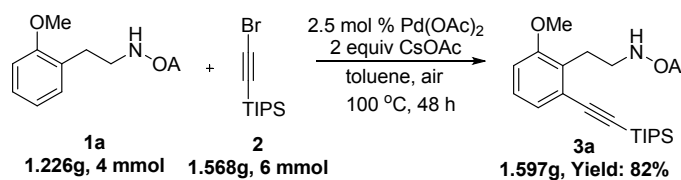

A mixture of **1a** (1.226 g, 4 mmol, 1.0 equiv), **2** (1.568 g, 6 mmol, 1.5 equiv), Pd(OAc)<sub>2</sub> (11 mg, 0.025 equiv), CsOAc (1.536 g, 2 equiv) and toluene (10 mL) in a 50 mL glass vial (sealed with PTFE cap) was heated at 100 °C for 48 hours. The reaction mixture was cooled to rt, and concentrated in vacuo. The resulting residue was purified by column chromatography on silica gel to give **3a** as yellow solid in 82% yield.

## 8. Removal of the TIPS<sup>[6]</sup>

**Scheme 2S** Removal of the TIPS.

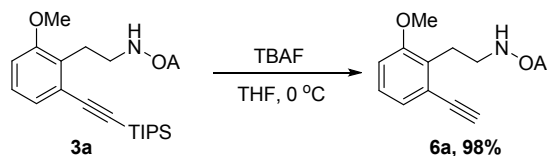

**3a** (0.146 g, 0.3 mmol) was dissolved in dry THF (10 mL). After cooling to 0 °C TBAF (400  $\mu$ L, 0.4 mmol, 1M solution in THF) were added and the reaction mixture stirred for 1h. Then some drops of water and  $\text{CH}_2\text{Cl}_2$  (20 mL) were added. The organic layer was washed three times with water and dried over  $\text{MgSO}_4$ . After evaporation of the solvent the residue was purified by column chromatography on silica gel afforded **6a** as pale yellow solid in 98% yield.

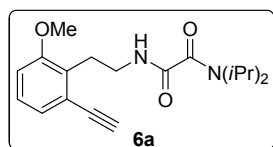

$^1\text{H}$  NMR (400 MHz,  $\text{CDCl}_3$ )  $\delta$  7.16 (br s, 1H), 7.10 – 7.05 (m, 1H), 7.04 – 7.00 (m, 1H), 4.52 – 4.46 (m, 1H), 3.77 (s, 3H), 3.48 (dd,  $J = 12.5, 6.7$  Hz, 2H), 3.44 – 3.37 (m, 1H), 3.22 (s, 1H), 3.07 (t,  $J = 6.8$  Hz, 2H), 1.34 (d,  $J = 6.8$  Hz, 6H), 1.10 (d,  $J = 6.7$  Hz, 6H);  $^{13}\text{C}$  NMR (101 MHz,  $\text{CDCl}_3$ )  $\delta$  163.34, 163.31, 157.43, 129.90, 127.35, 124.93, 123.24, 111.10, 81.88, 81.02, 55.45, 49.41, 46.20, 39.06, 27.39, 20.74, 19.94; HRMS (ESI-TOF)  $m/z$   $[\text{M}+\text{H}]^+$  Calcd for  $\text{C}_{19}\text{H}_{27}\text{N}_2\text{O}_3$ : 331.2022; found: 331.2017.

## 9. Removal of the Directing Group<sup>[7]</sup>

**Scheme 3S** Removal of the Directing Group.

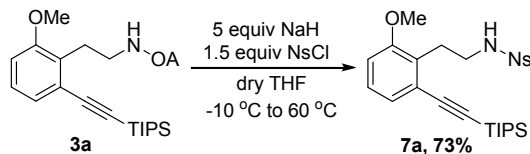

A mixture of **3a** (0.146 g, 0.3 mmol, 1.0 equiv) in THF (2 mL) was stirred for 10 min at -10 °C, NaH (60 %) (0.06 g, 2.5 mmol, 5.0 equiv) was slowly added, and then stirred for another 1 hour. NsCl (0.1 g, 7.5 mmol, 1.5 equiv) was added slowly for thirty minutes. The mixture was stirred over night at room temperature and heated at 60 °C for another 12 hours. The reaction mixture was cooled to rt, quenched with water (20 mL), extracted with  $\text{CH}_2\text{Cl}_2$  (10 mL  $\times$  2). The combined organic phase was washed with brine (20 mL), dried over anhydrous  $\text{Na}_2\text{SO}_4$ . Evaporation and column chromatography on silica gel afforded **7a** as pale yellow solid in 73% yield.

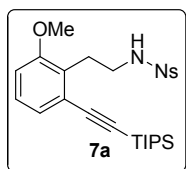

$^1\text{H}$  NMR (400 MHz,  $\text{CDCl}_3$ )  $\delta$  8.11 (d,  $J = 8.9$  Hz, 2H), 7.71 (d,  $J = 8.9$  Hz, 2H), 7.09 (t,  $J = 8.0$  Hz, 1H), 6.95 (dd,  $J = 7.7, 0.9$  Hz, 1H), 5.02 (br s, 1H), 3.79 (s, 3H), 3.41 – 3.30 (m, 2H), 3.07 – 2.98 (m, 2H), 1.14 (d,  $J = 2.6$  Hz, 18H), 1.06 (d,  $J = 6.2$  Hz, 3H);  $^{13}\text{C}$  NMR (101 MHz,  $\text{CDCl}_3$ )  $\delta$  157.22, 145.43, 128.32, 127.93, 127.87, 125.60, 124.83, 124.03, 111.02, 104.84, 95.92, 55.90, 43.30, 27.32, 18.83, 11.42; HRMS (ESI-TOF)  $m/z$   $[\text{M}+\text{H}]^+$  Calcd for  $\text{C}_{26}\text{H}_{37}\text{N}_2\text{O}_5\text{Si}$ : 517.2192; found: 517.2187.

## 10. Synthesis of 3,4-Dihydroisoquinoline 8a

**Scheme 4S** Synthesis of 3,4-Dihydroisoquinoline **8a**.

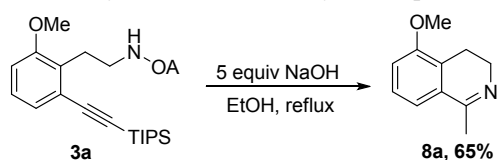

A mixture of **3a** (0.146 g, 0.3 mmol, 1.0 equiv) and NaOH (0.06 g, 1.5 mmol, 5.0 equiv) in EtOH (2 mL) was stirred at 80 °C for 12 hours. The reaction mixture was cooled to rt, then some drops of water and  $\text{CH}_2\text{Cl}_2$  (20 mL) were added. The organic layer was washed three times with water and dried over  $\text{MgSO}_4$ . After evaporation of the solvent the residue was purified by column chromatography on silica gel afforded **8a** as pale yellow solid in 65% yield.

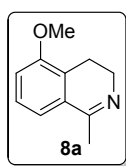

$^1\text{H}$  NMR (400 MHz,  $\text{CDCl}_3$ )  $\delta$  7.33 (t,  $J = 8.0$  Hz, 1H), 7.23 (d,  $J = 7.6$  Hz, 1H), 7.07 (d,  $J = 8.2$  Hz, 1H), 3.87 (s, 3H), 3.76 – 3.71 (m, 2H), 2.85 – 2.80 (m, 2H), 2.61 (s, 3H);  $^{13}\text{C}$  NMR (101 MHz,  $\text{CDCl}_3$ )  $\delta$  156.08, 128.91, 127.89, 125.89, 119.18, 114.92, 55.89, 44.29, 29.84, 22.22, 18.71; HRMS (ESI-TOF)  $m/z$   $[\text{M}+\text{H}]^+$  Calcd for  $\text{C}_{11}\text{H}_{14}\text{NO}$ : 176.1075; found: 176.1070.

## 11. Optimization of Protecting Group



**Table 2S** Optimization of Protecting Group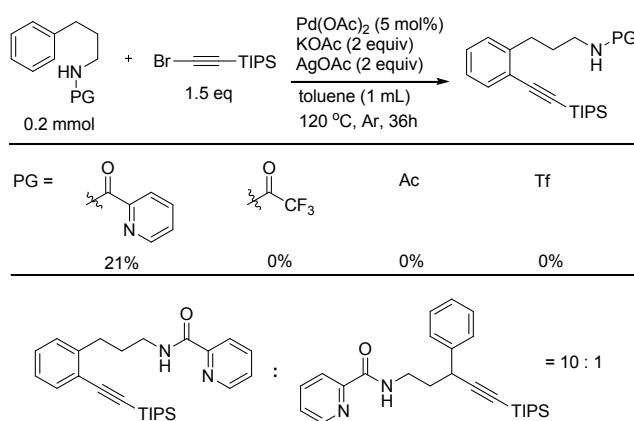

A variety of protecting group for  $\gamma$ -Arylpropamine had been tested: However none could give synthetic acceptable yield. It worth to note that the picolinamide assisted alkylation gave a mixture of  $\gamma$  and  $\epsilon$ -alkynylated products analyzed by proton NMR.

## 12. Alkylation of different substituted bromoalkyne

**Table 3S** Alkylation of different substituted bromoalkyne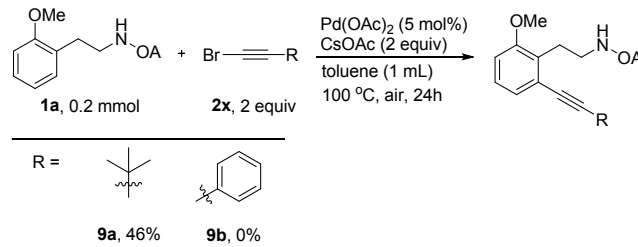

We had tested the alkyl and aryl alkynyl bromide under standard condition. The alkyl alkynyl bromide (**2a**) gave the desired products in 46% isolated yield. Unfortunately, the aryl alkynyl bromide (**2b**) failed to give any alkynylated product, only starting material recovered.

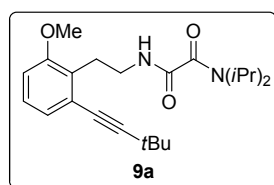

$^1\text{H NMR}$  (400 MHz,  $\text{CDCl}_3$ )  $\delta$  7.11 (d,  $J = 7.9$  Hz, 1H), 7.08 (br s, 1H), 6.99 (dd,  $J = 7.7, 0.8$  Hz, 1H), 6.78 (d,  $J = 7.9$  Hz, 1H), 4.58 – 4.51 (m, 1H), 3.82 (s, 3H), 3.55 – 3.50 (m, 2H), 3.45 (dd,  $J = 13.6, 6.8$  Hz, 1H), 1.40 (d,  $J = 6.8$  Hz, 6H), 1.32 (s, 9H), 1.14 (d,  $J = 6.7$  Hz, 6H);  $^{13}\text{C NMR}$  (101 MHz,  $\text{CDCl}_3$ )  $\delta$  163.47, 163.41, 157.52, 129.20, 127.31, 125.27, 124.52, 110.05, 102.79, 55.60, 49.55, 46.43, 39.62, 31.11, 28.28, 27.24, 20.95, 20.17; HRMS (ESI-TOF)  $m/z$   $[\text{M}+\text{H}]^+$  Calcd for  $\text{C}_{23}\text{H}_{35}\text{N}_2\text{O}_3$ : 387.2648; found: 387.2645.

### 13. Alkynylation of $\delta$ -Arylbutamine Derivatives

**Scheme 5S** Alkynylation of  $\delta$ -Arylbutamine Derivatives.

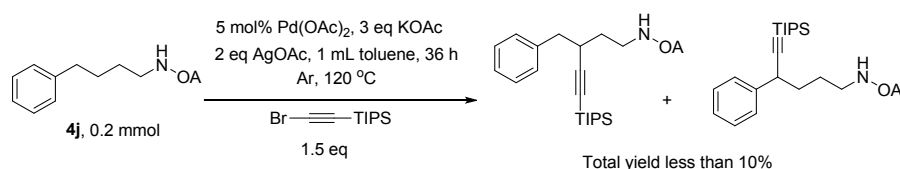

We had tested the delta-amide (**4j**) under standard condition. However it failed to give any delta-position alkynylated product. In fact a mixture of  $\gamma$  and  $\delta$ -alkynylated product was observed which was analyzed by proton NMR.

### 14. References

- [1] T.-S. Mei, X. Wang and J.-Q. Yu, *J. Am. Chem. Soc.*, 2009, **131**, 10806.
- [2] G. Xu and S. R. Gilbertson, *Org. Lett.*, 2005, **7**, 4605.
- [3] G. He, C. Lu, Y. Zhao, W. A. Nack and G. Chen, *Org. Lett.*, 2012, **14**, 2944.
- [4] J. Han, P. Liu, C. Wang, Q. Wang, J.-Y. Zhang, Y.-W. Zhao, D.-Q. Shi, Z.-B. Huang and Y.-S. Zhao, *Org. Lett.*, 2014, **16**, 5682.
- [5] C. Wang, C.-P. Chen, J.-Y. Zhang, Y.-M. Yao and Y.-S. Zhao, *Angew. Chem.*, 2014, **126**, 10042; *Angew. Chem., Int. Ed.*, 2014, **53**, 9884.
- [6] F. Wessendorf, B. Grimm, D. M. Guldi and A. Hirsch, *J. Am. Chem. Soc.*, 2010, **132**, 10786.
- [7] C.-P. Chen, C. Wang, J.-Y. Zhang and Y.-S. Zhao, *J. Org. Chem.*, 2015, **80**, 942.

### 15. NMR spectra

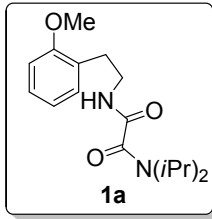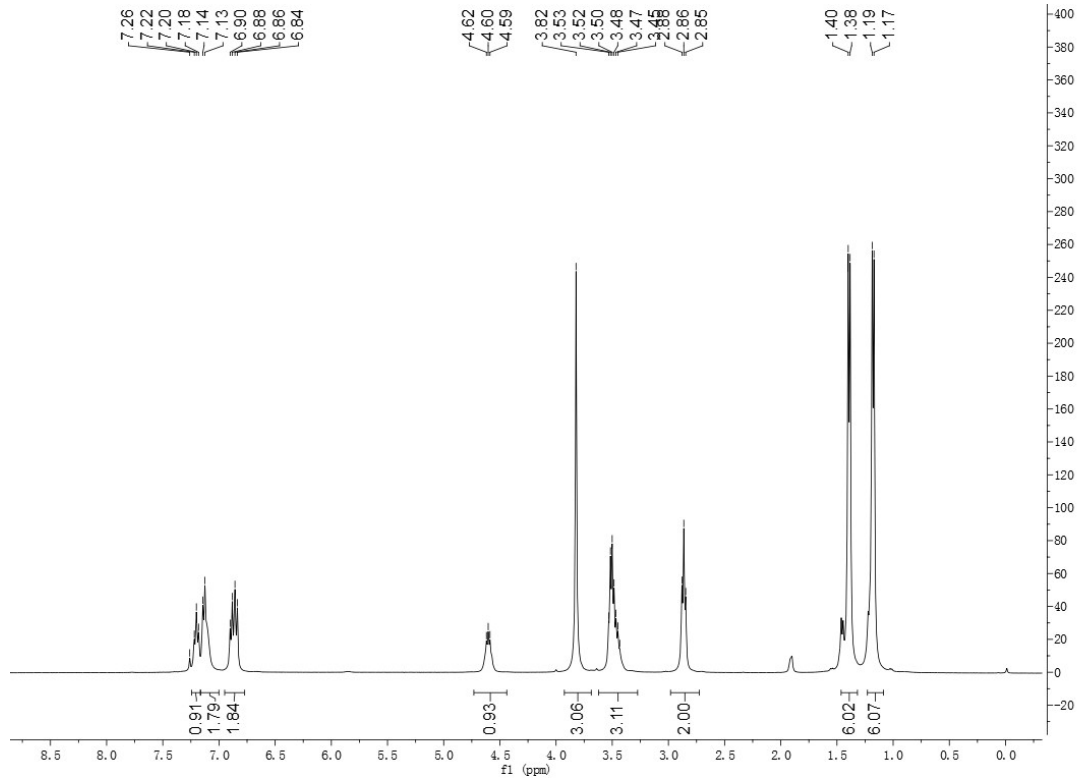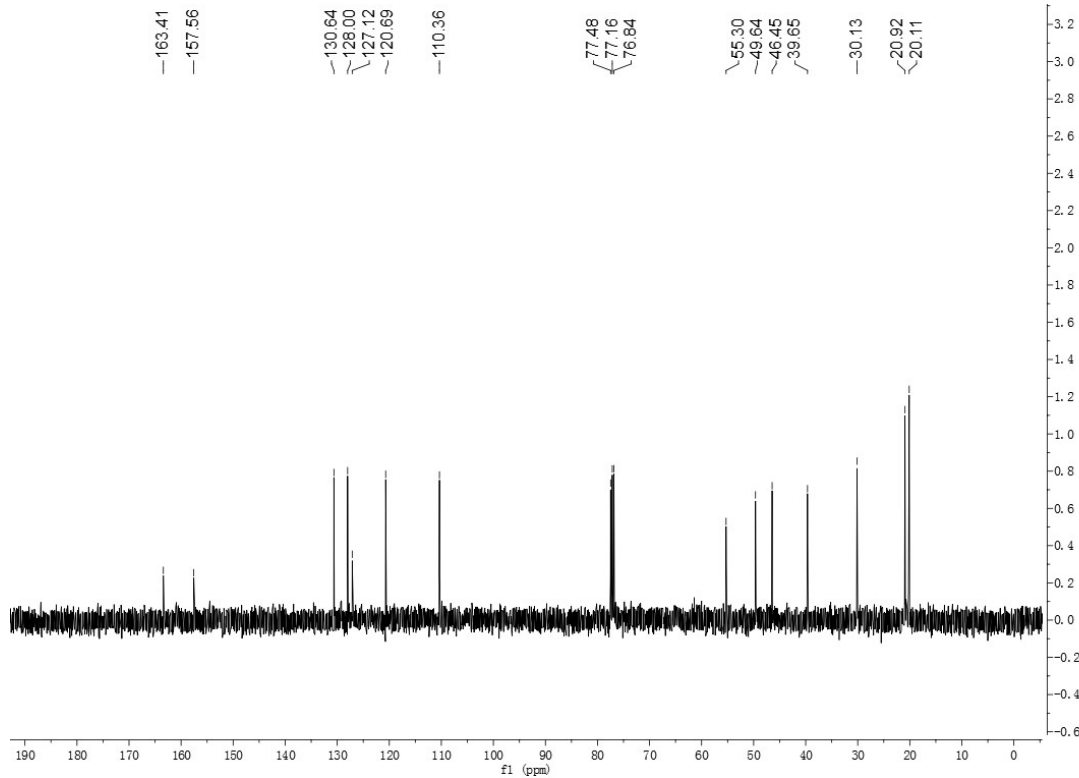

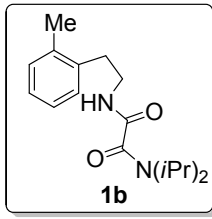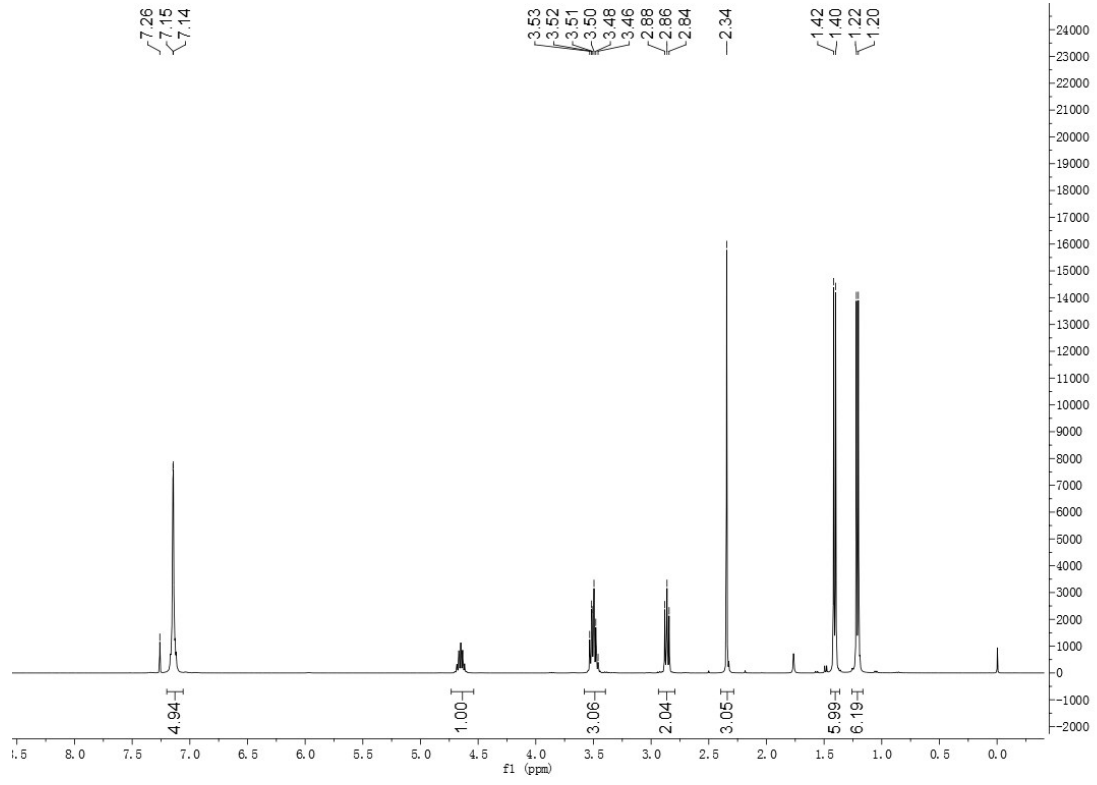

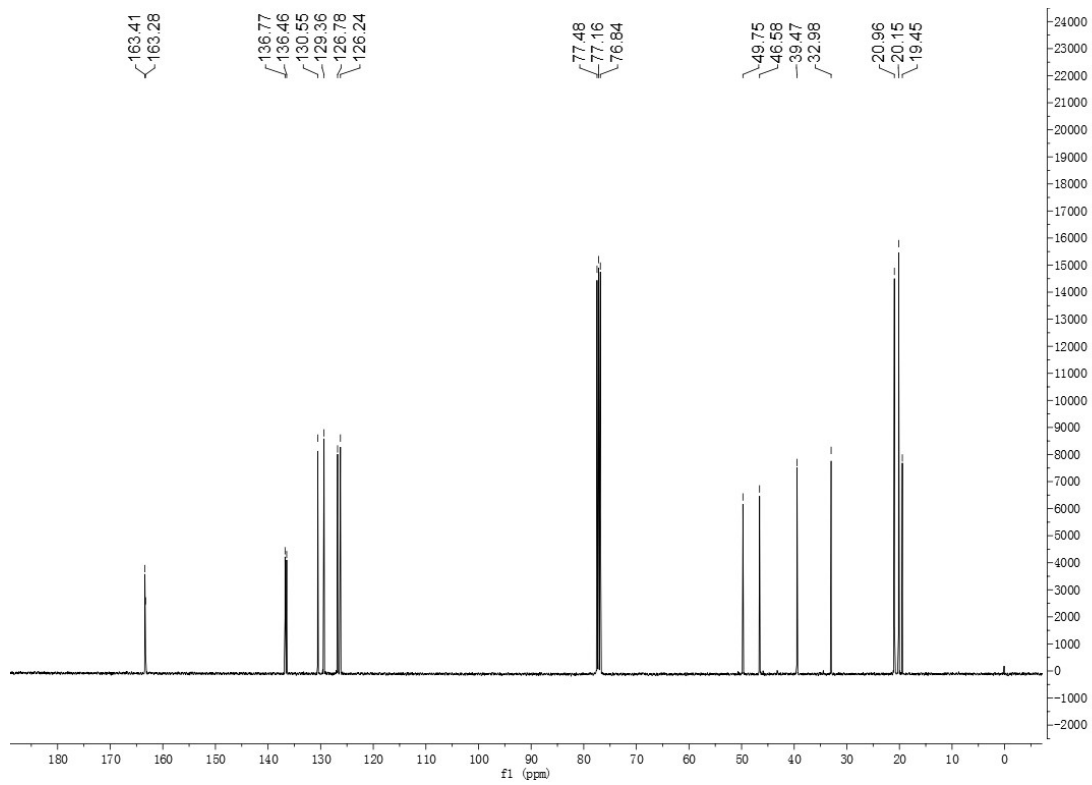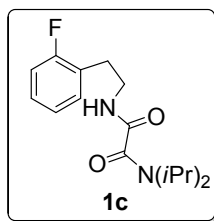

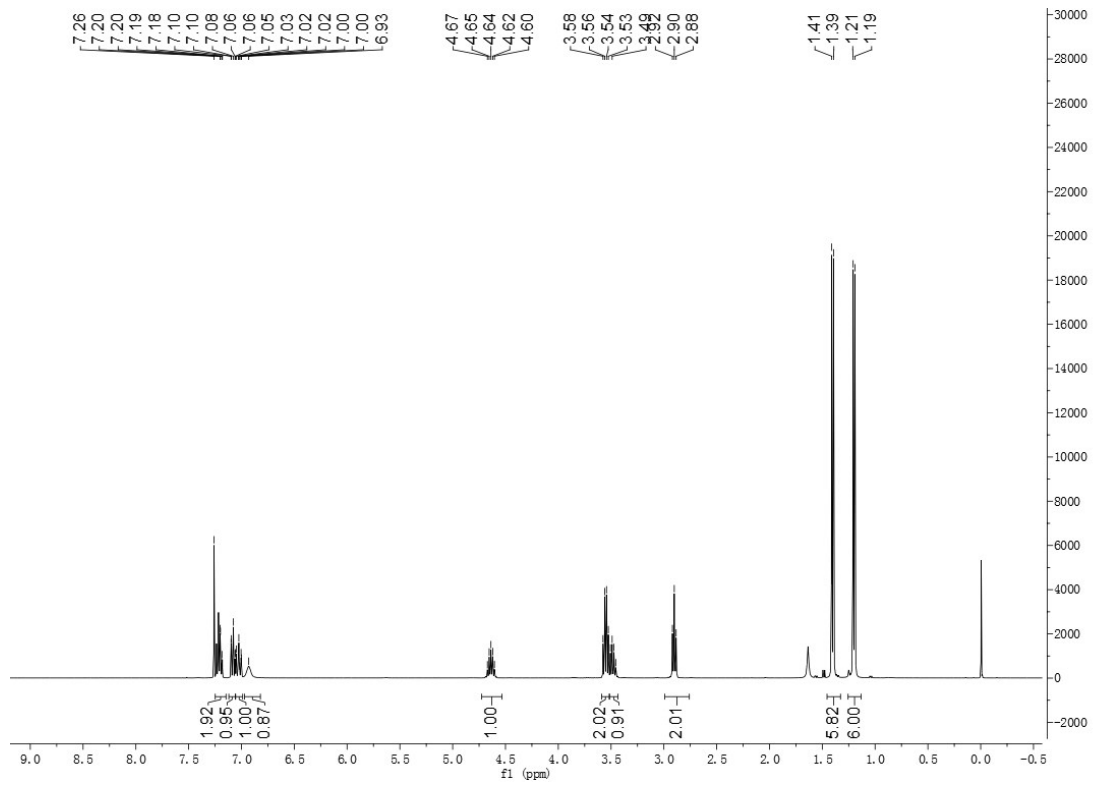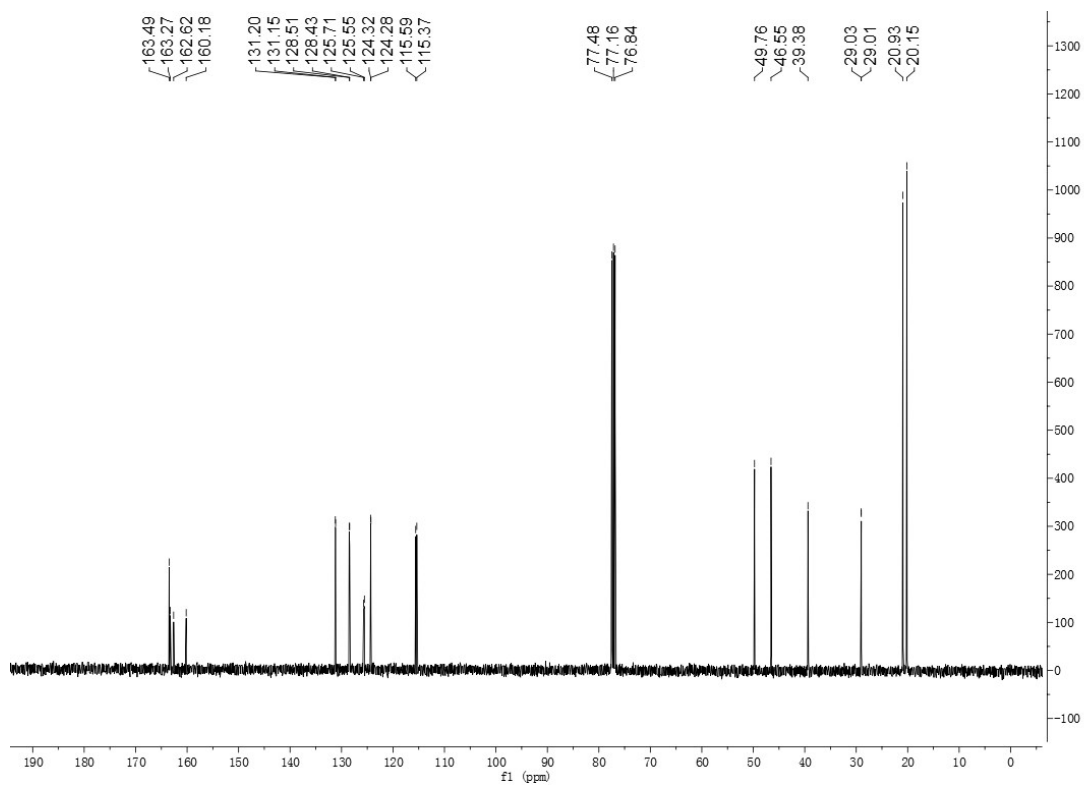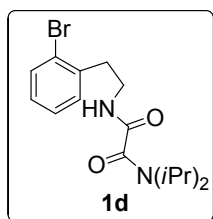

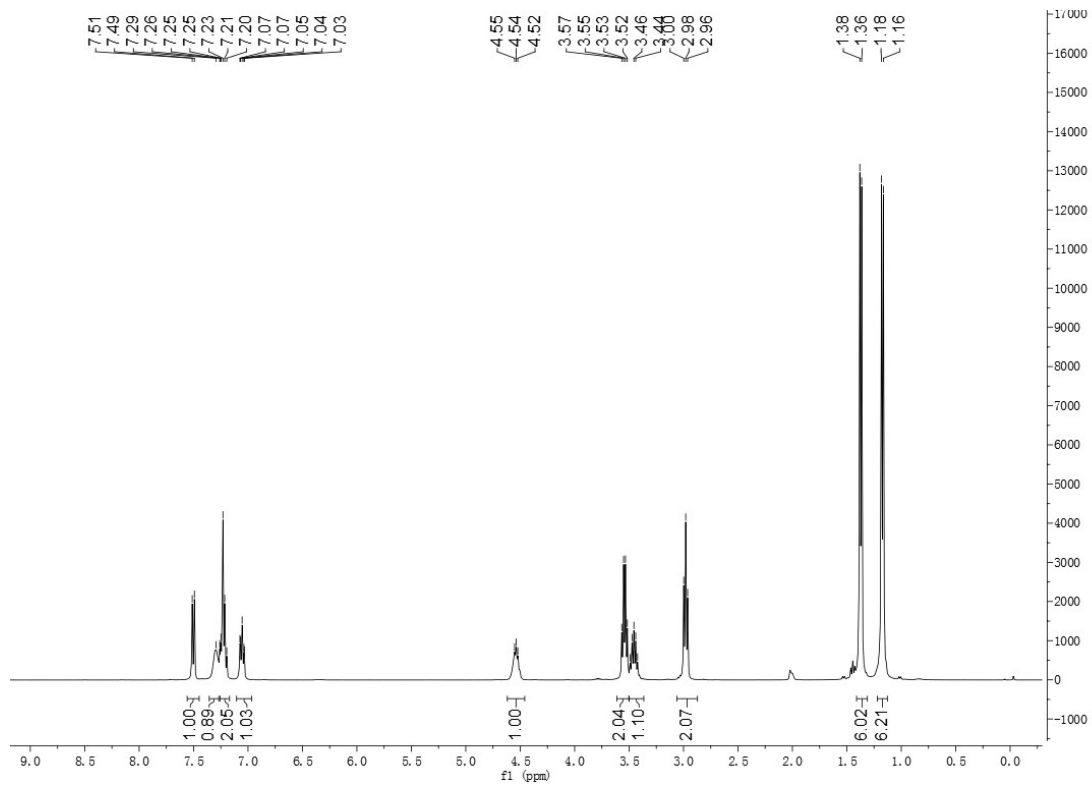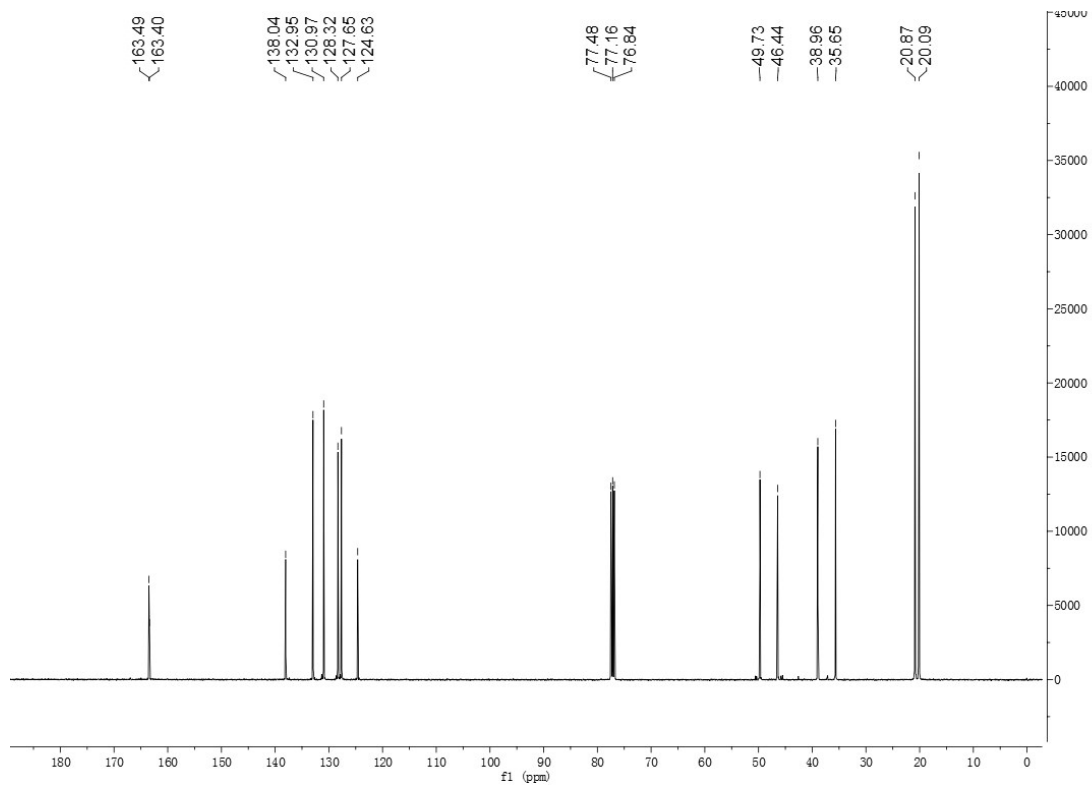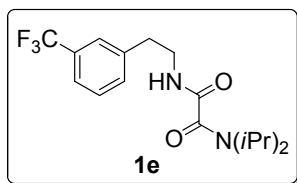

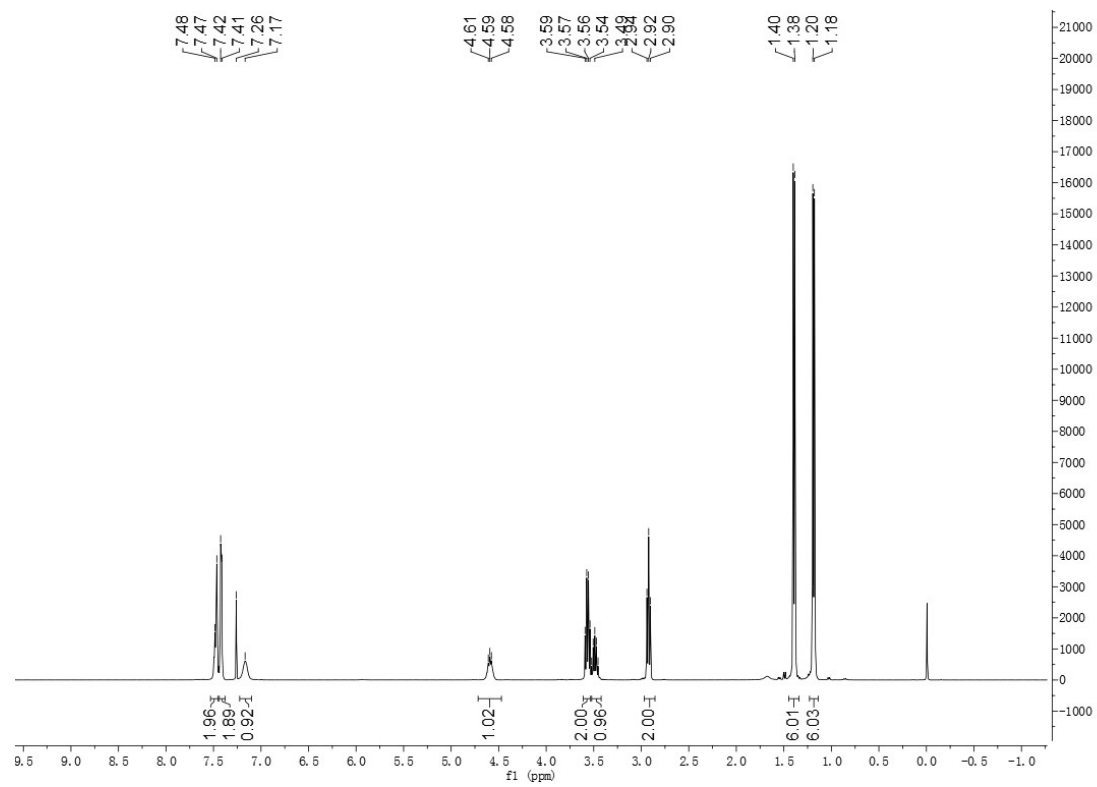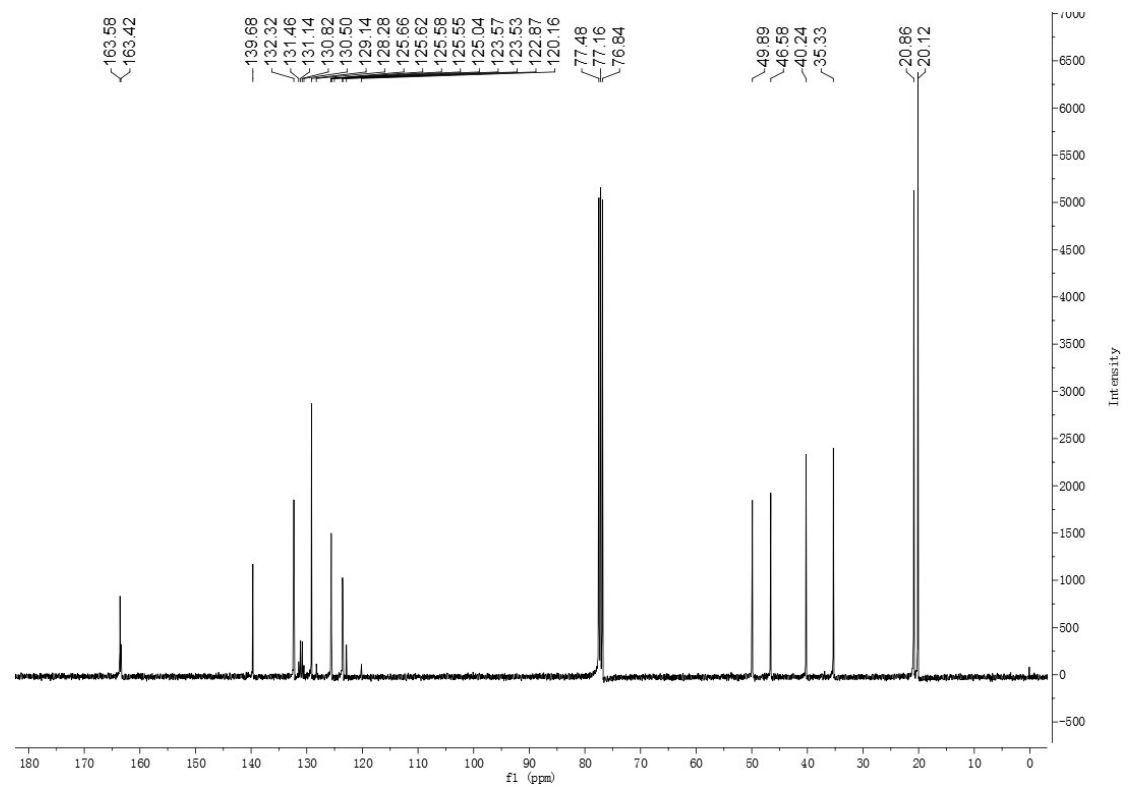



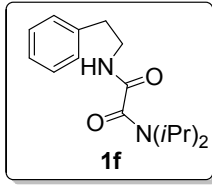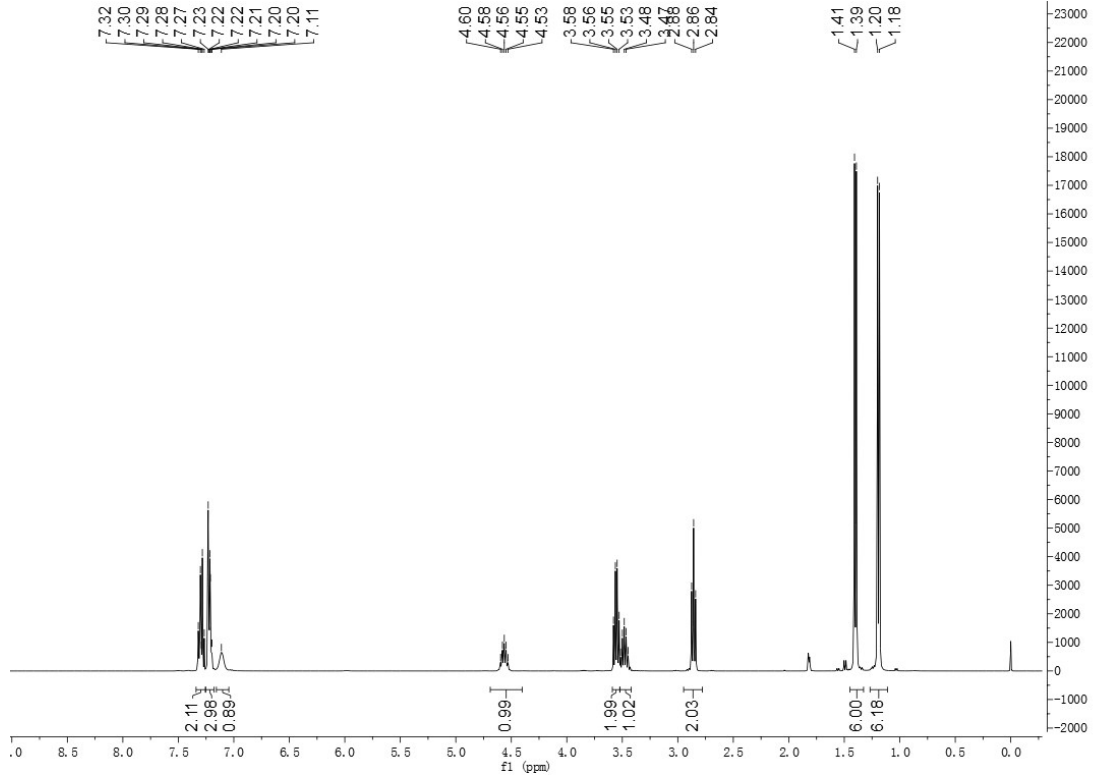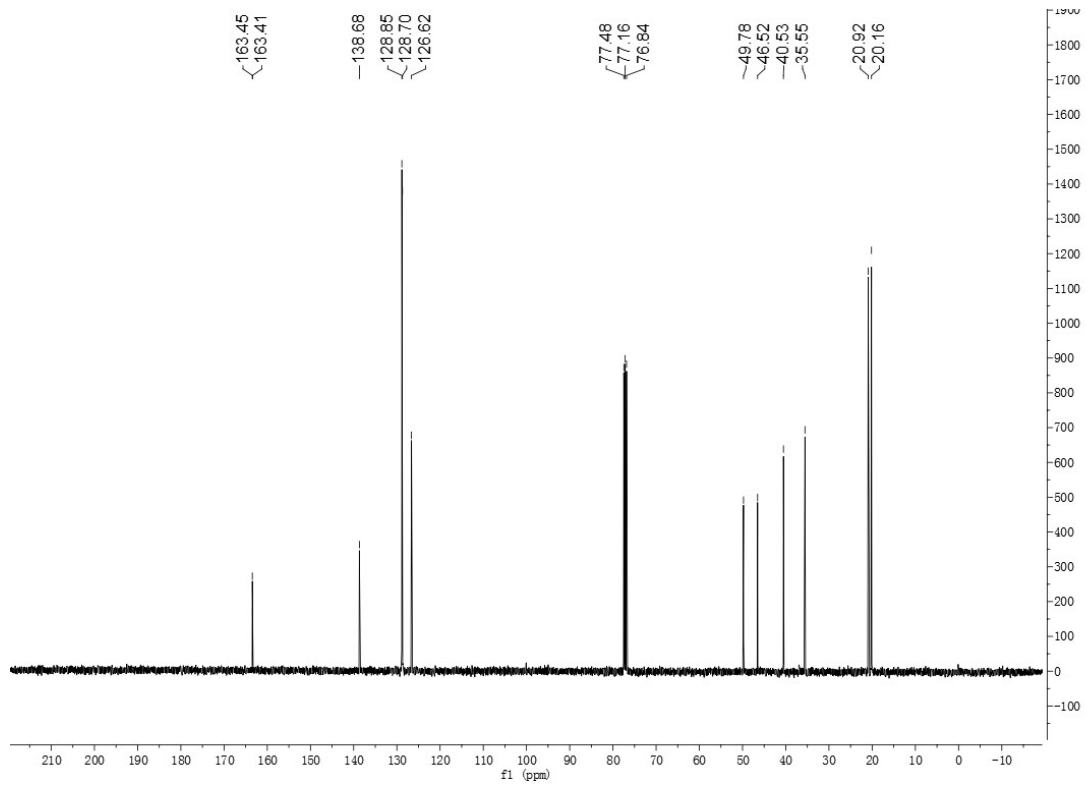

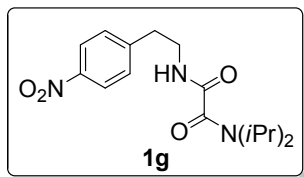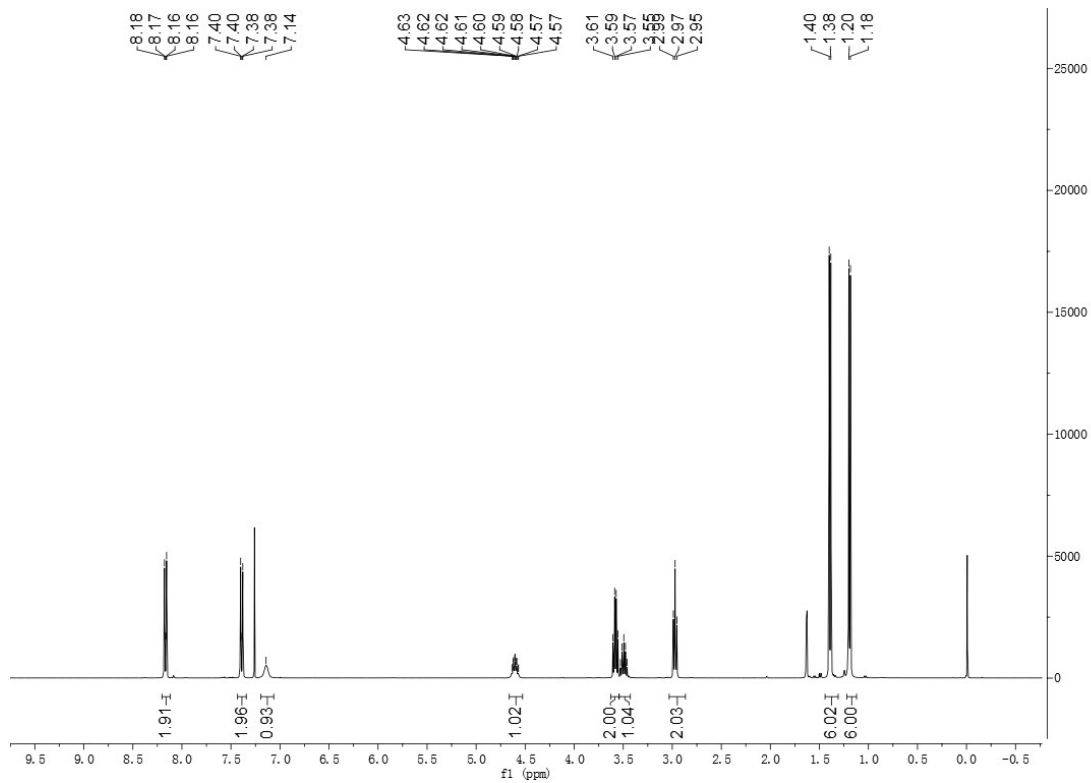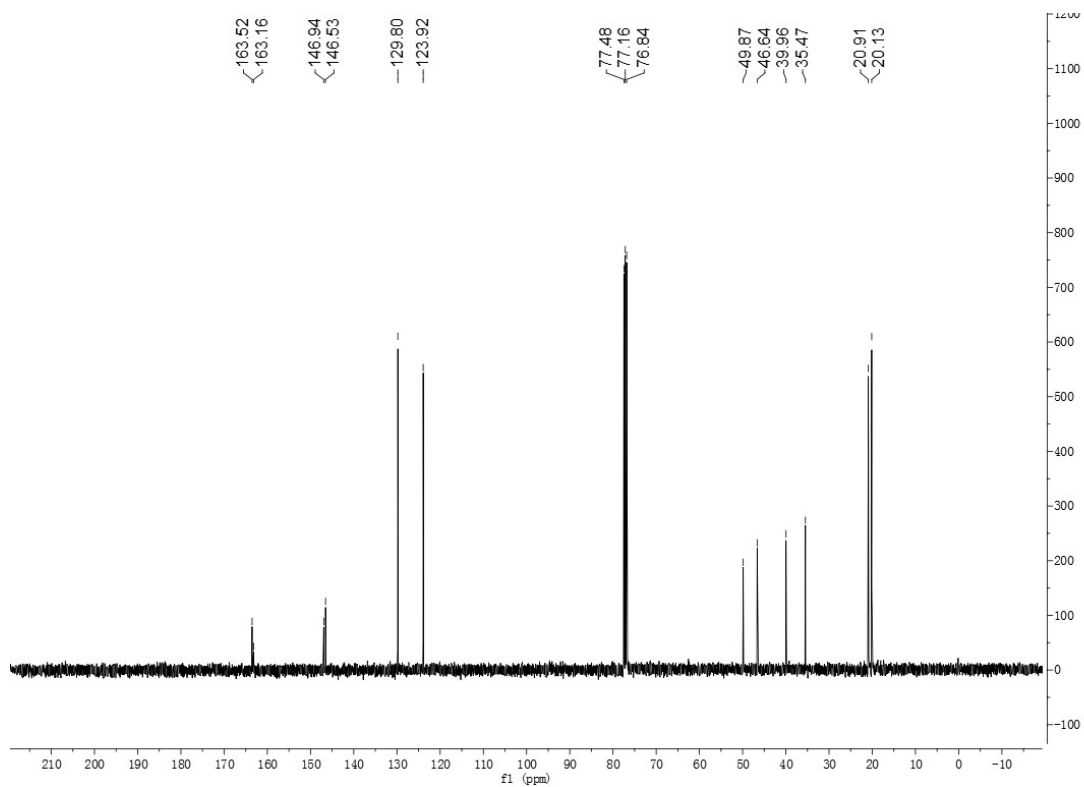

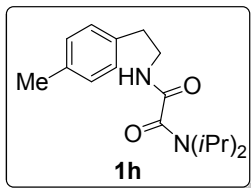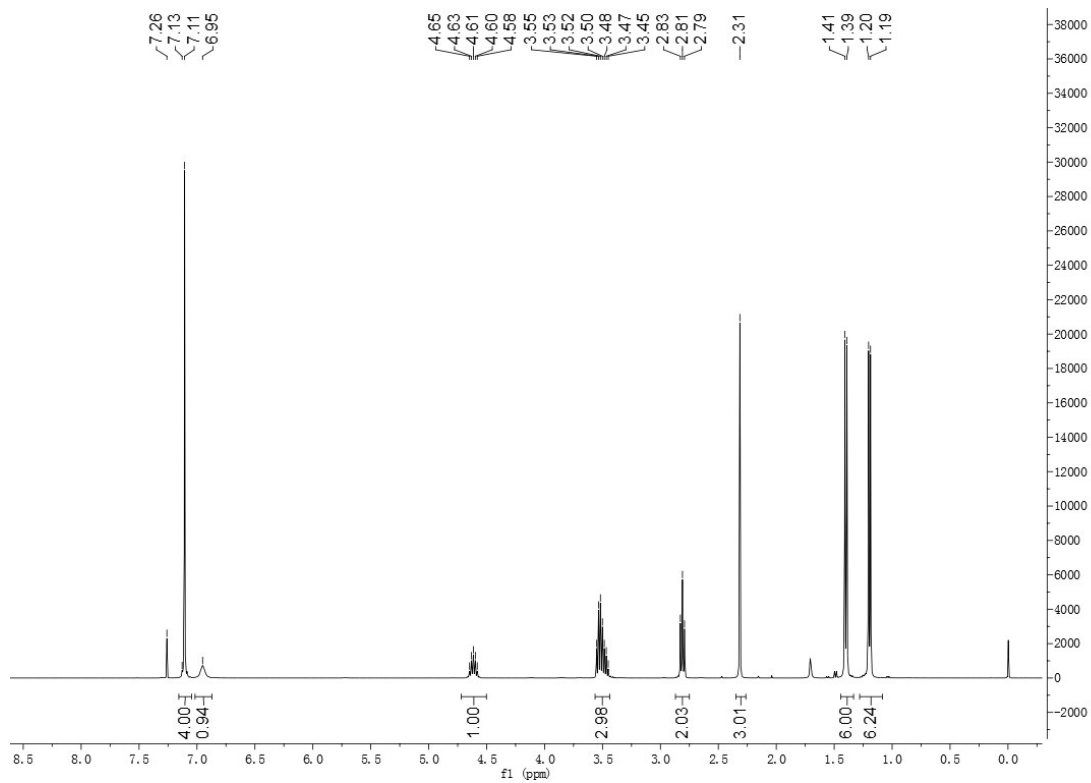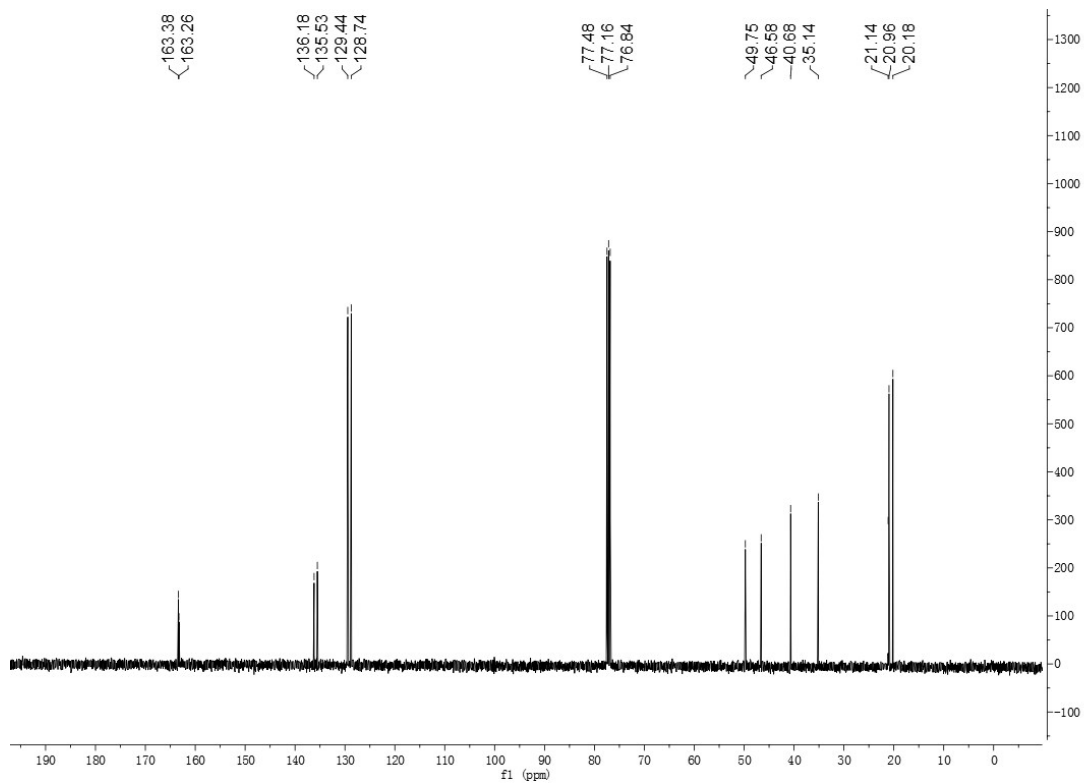

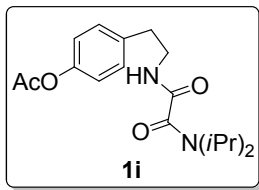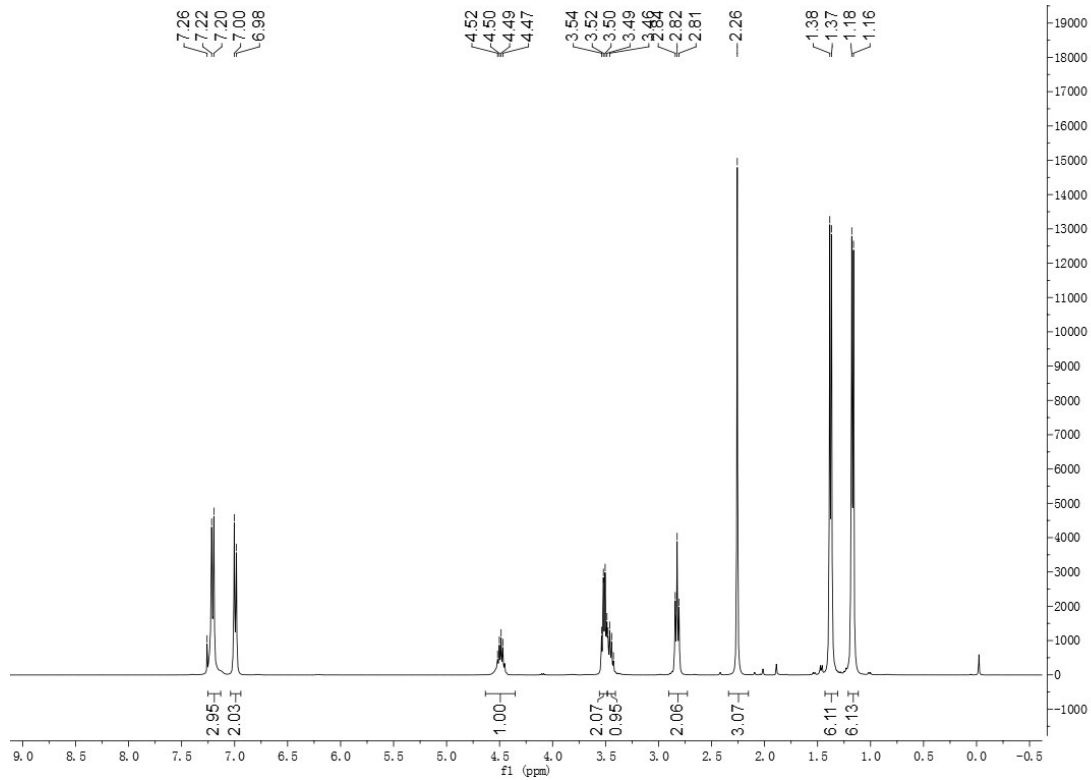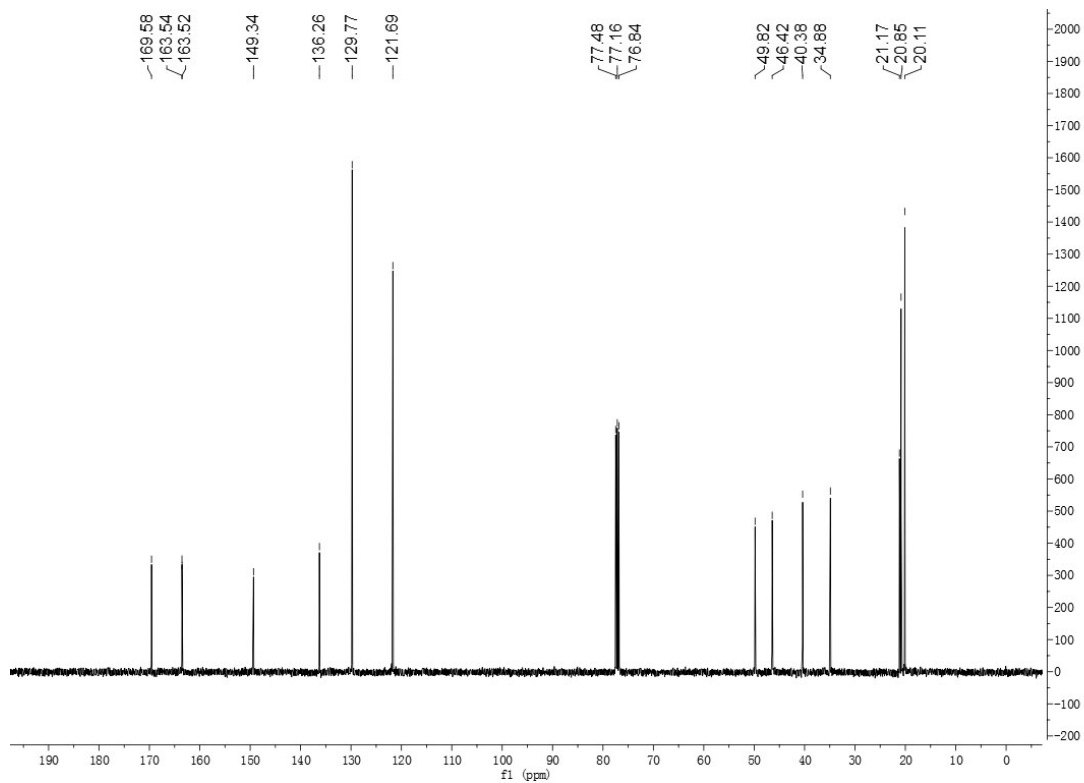

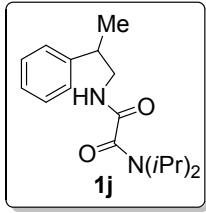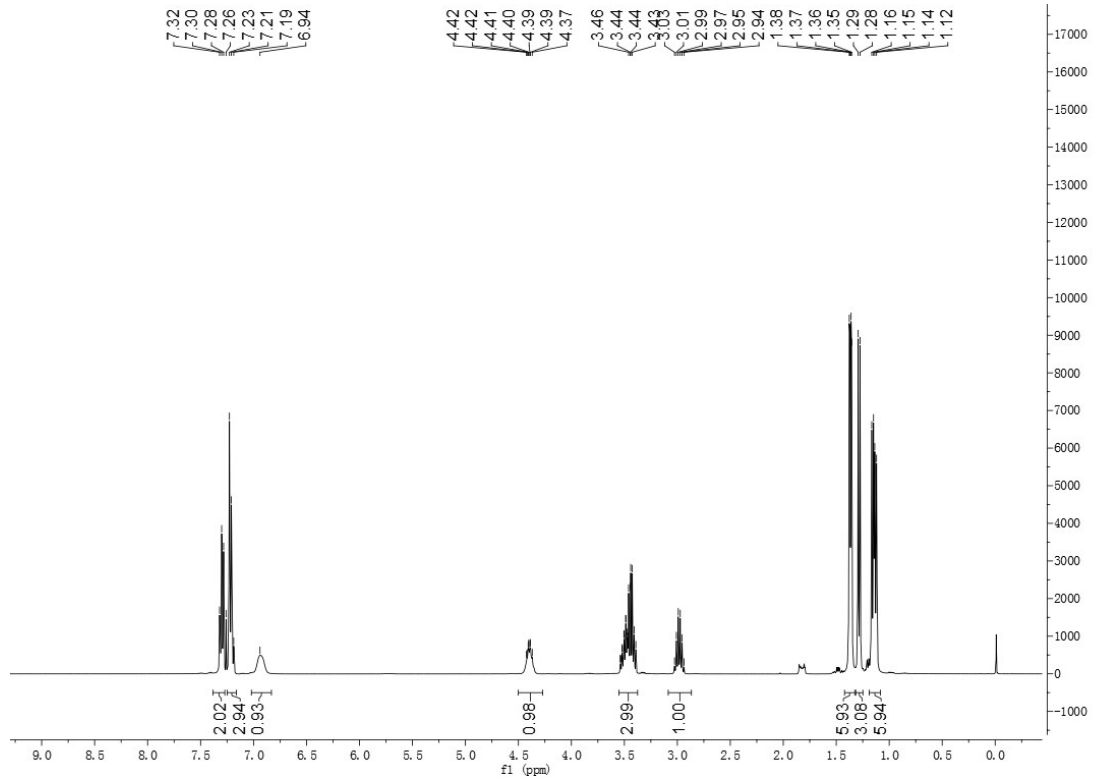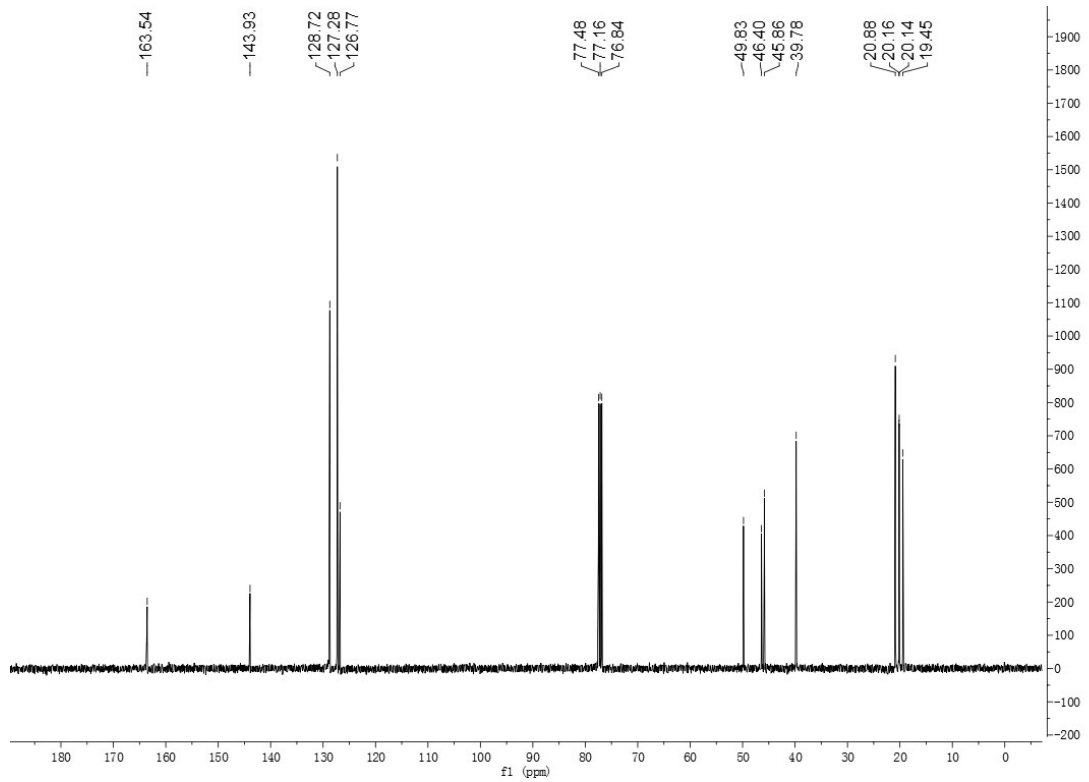

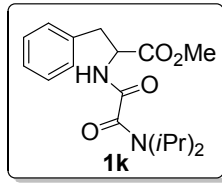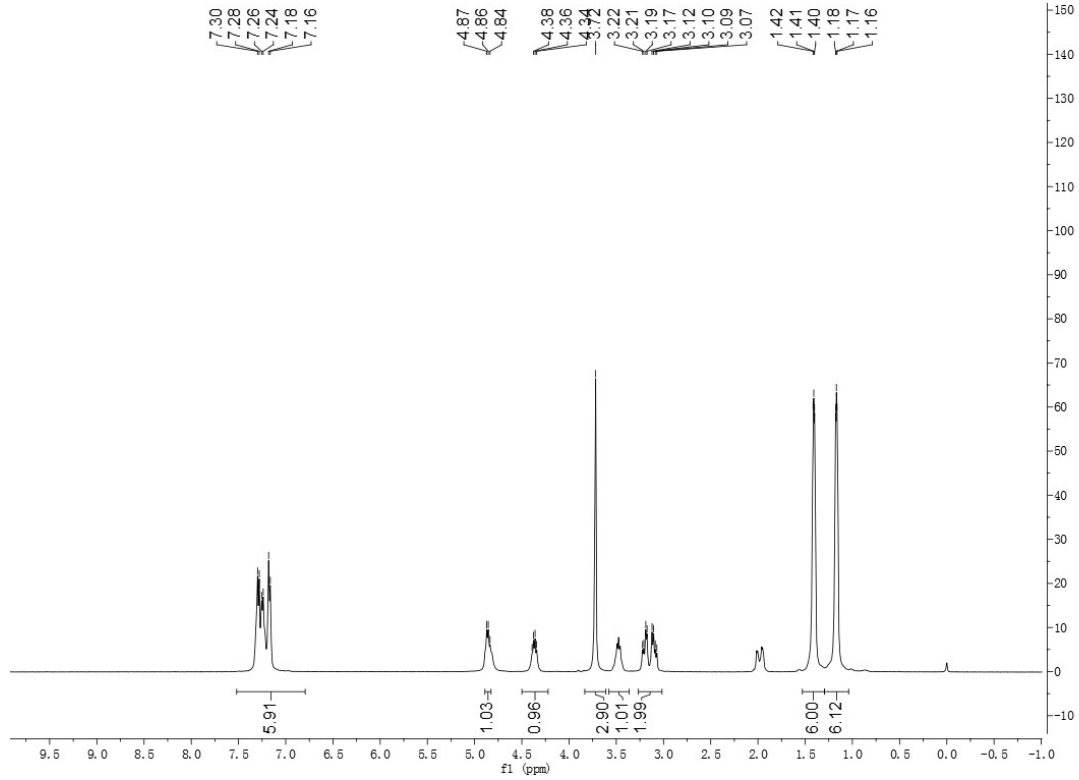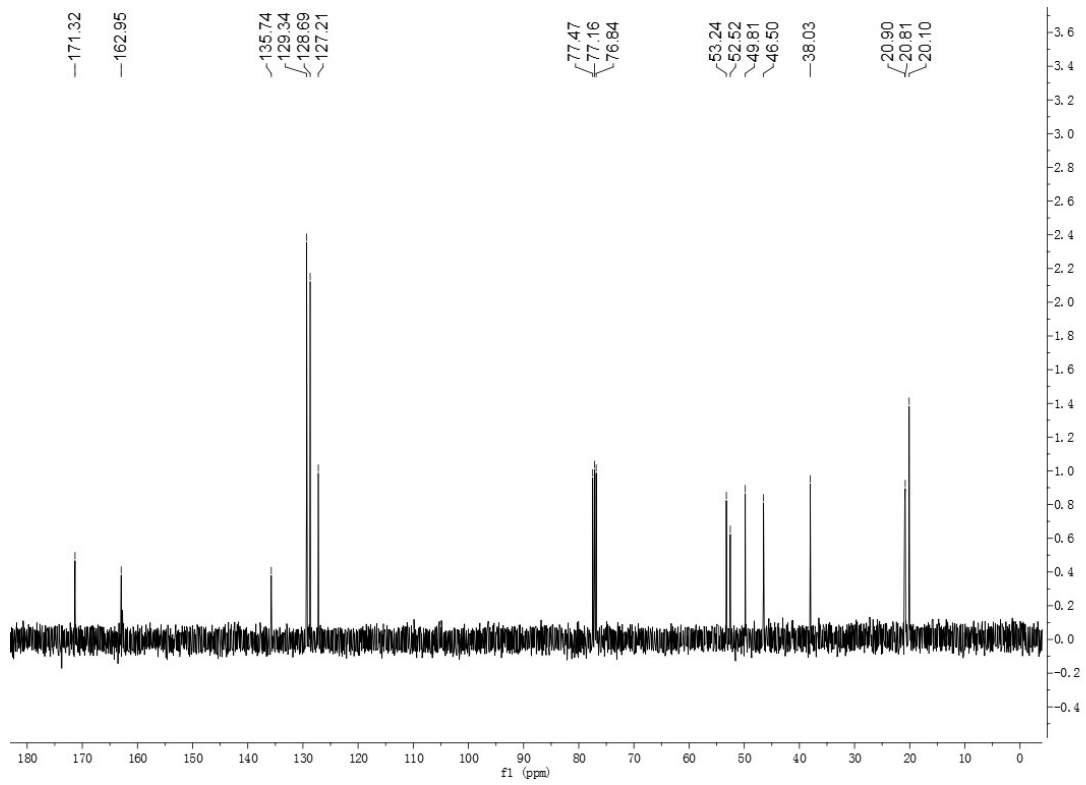

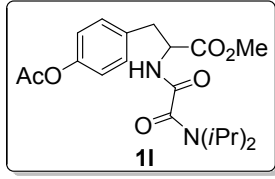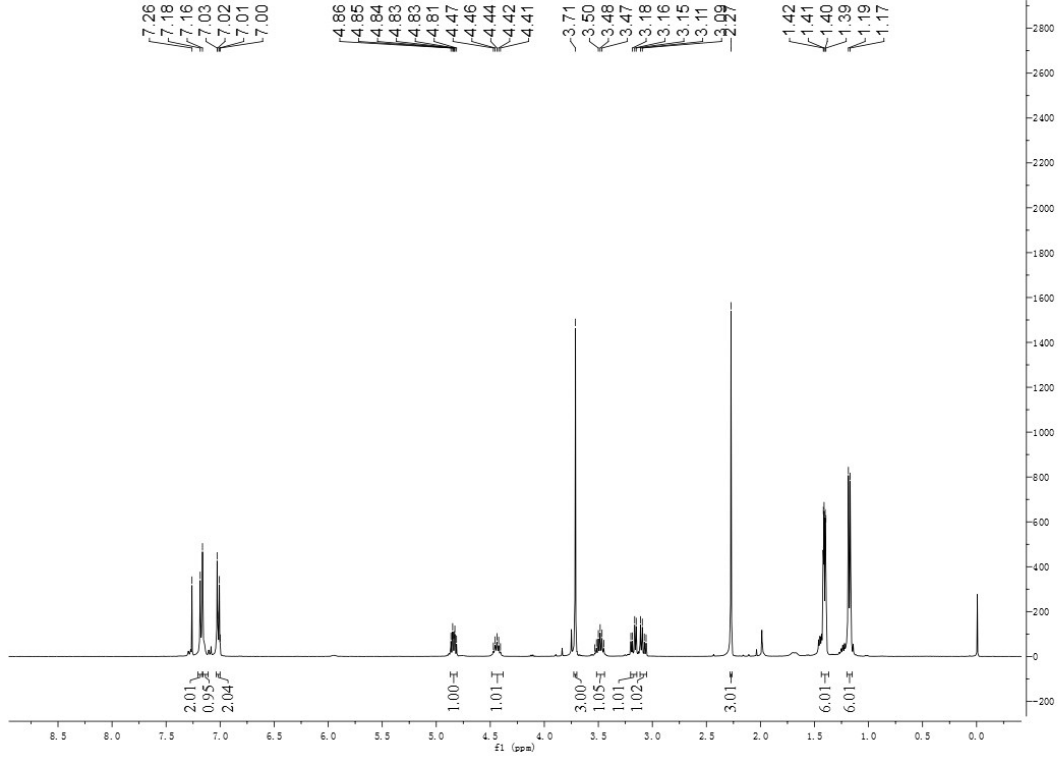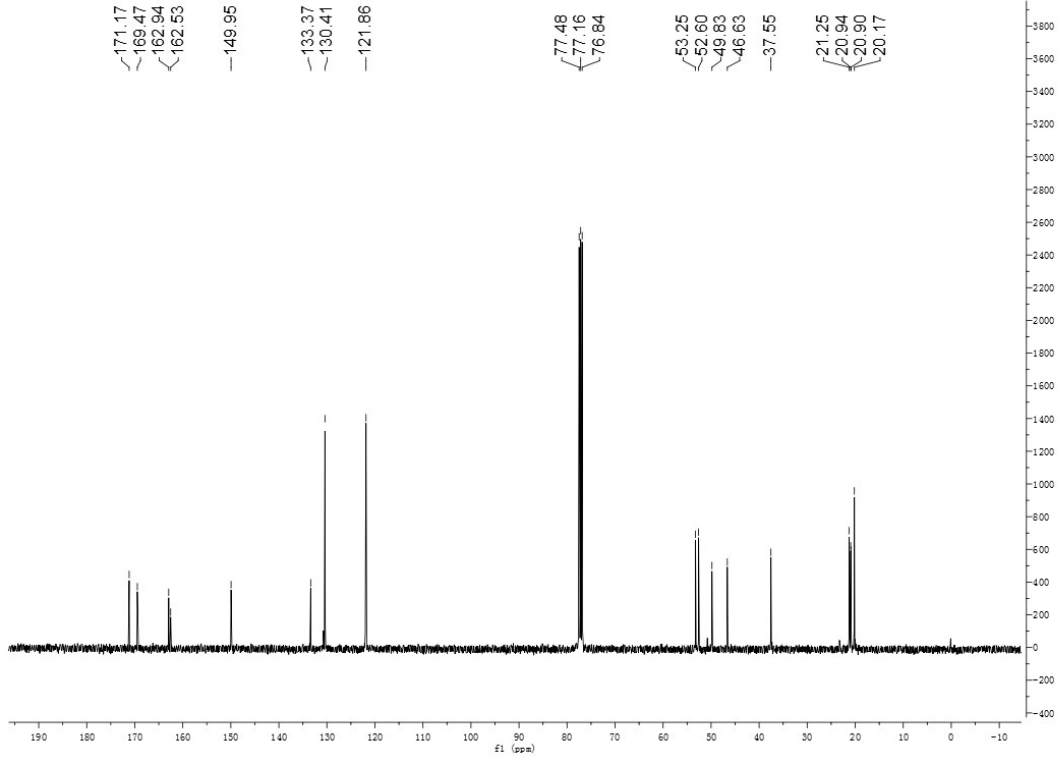

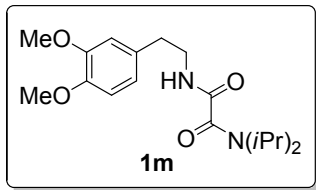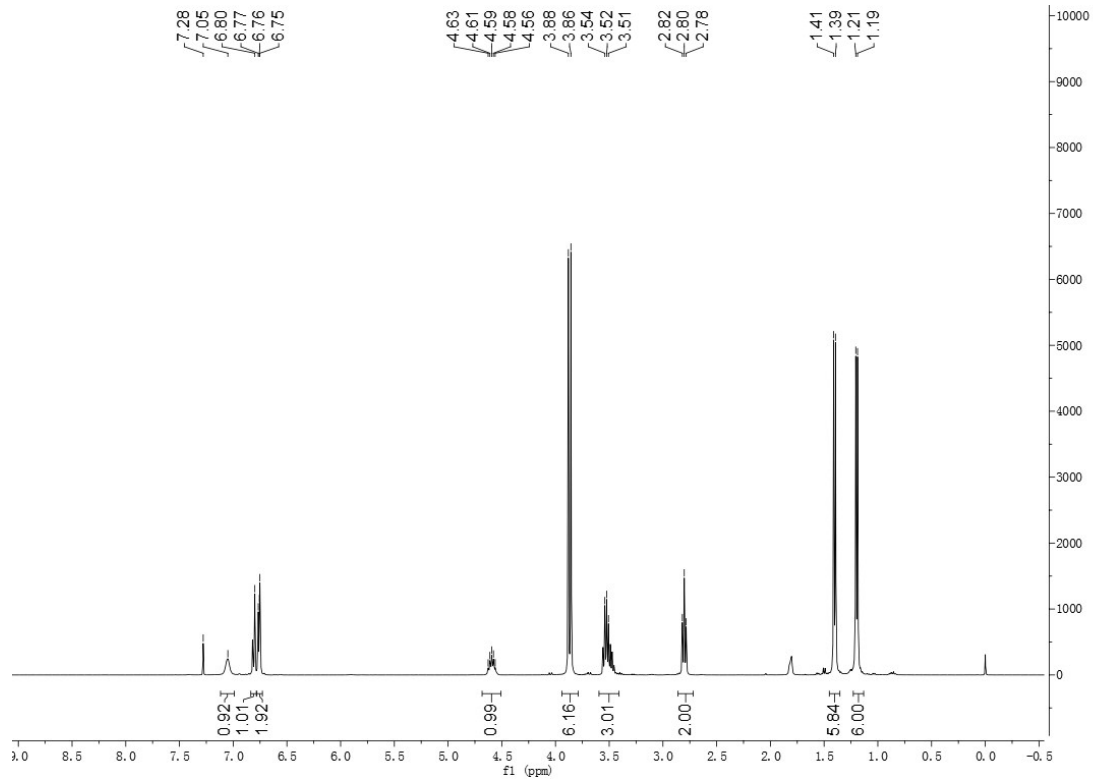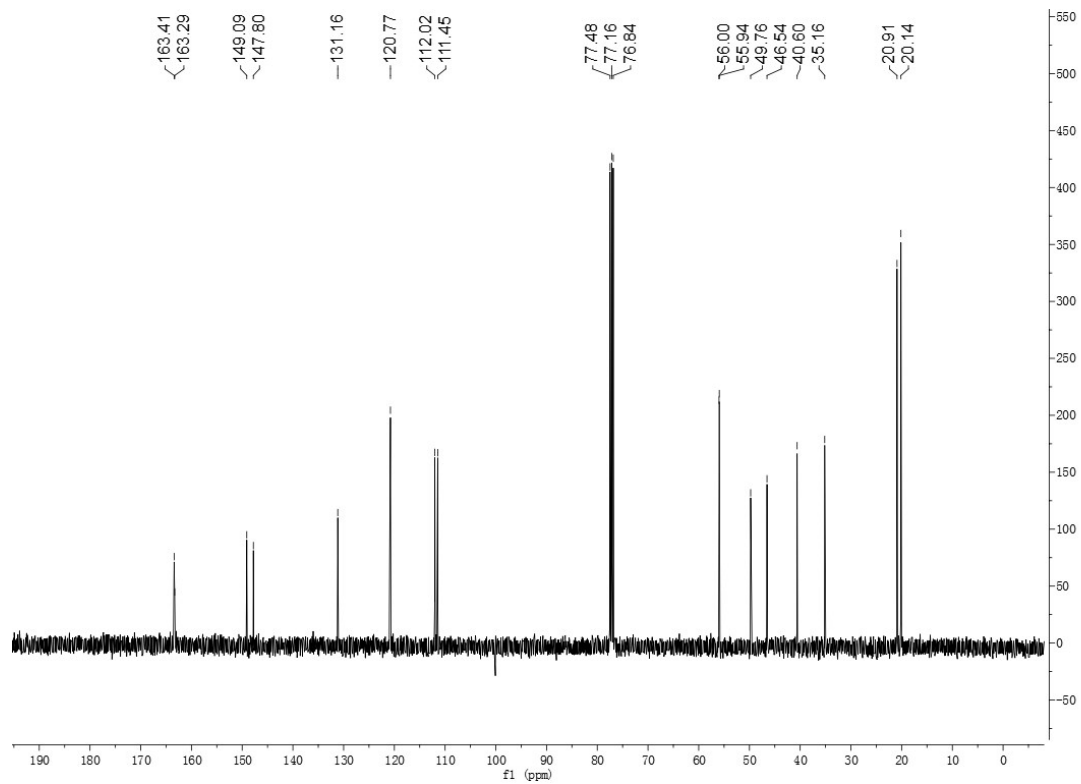



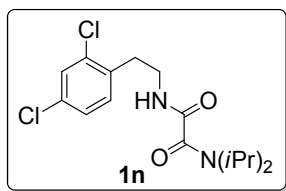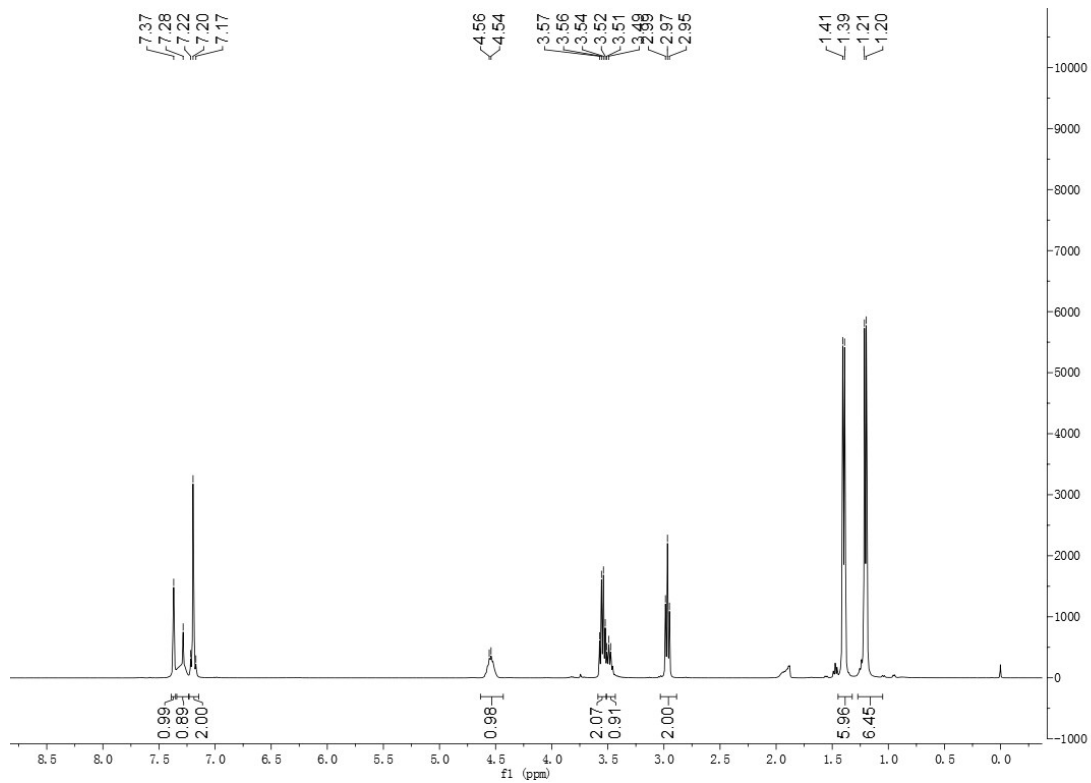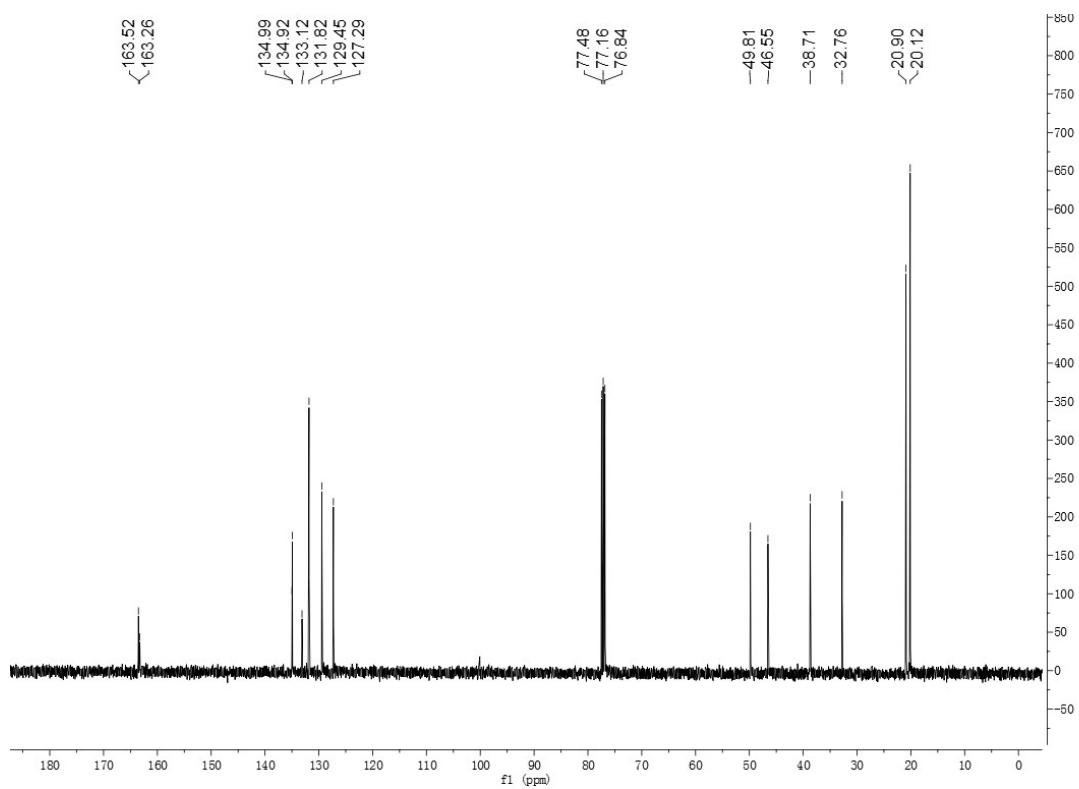

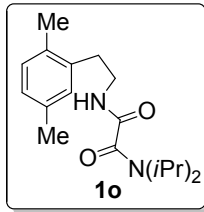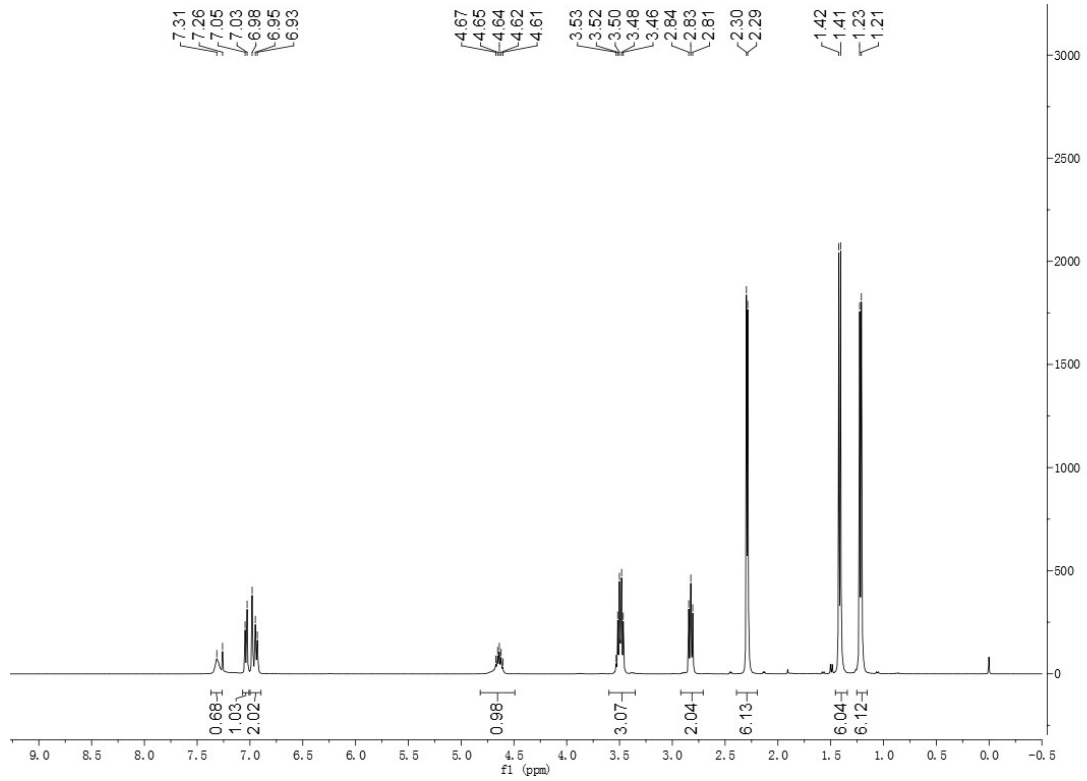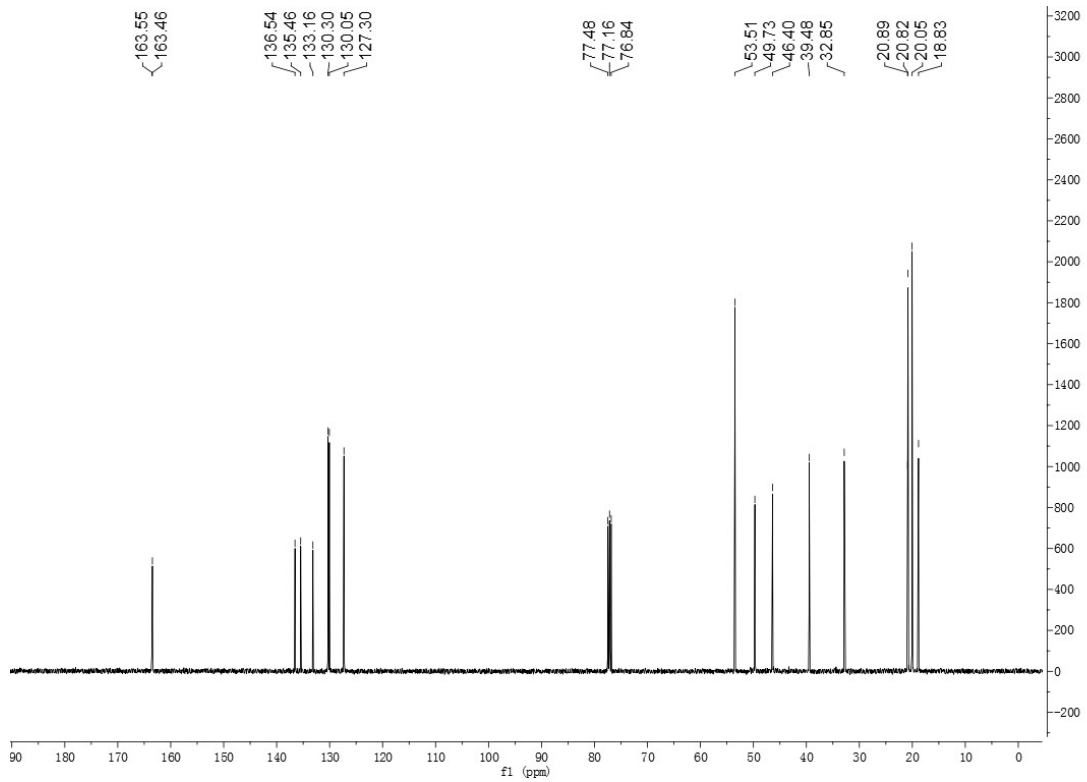

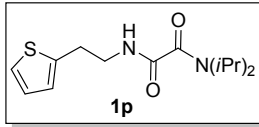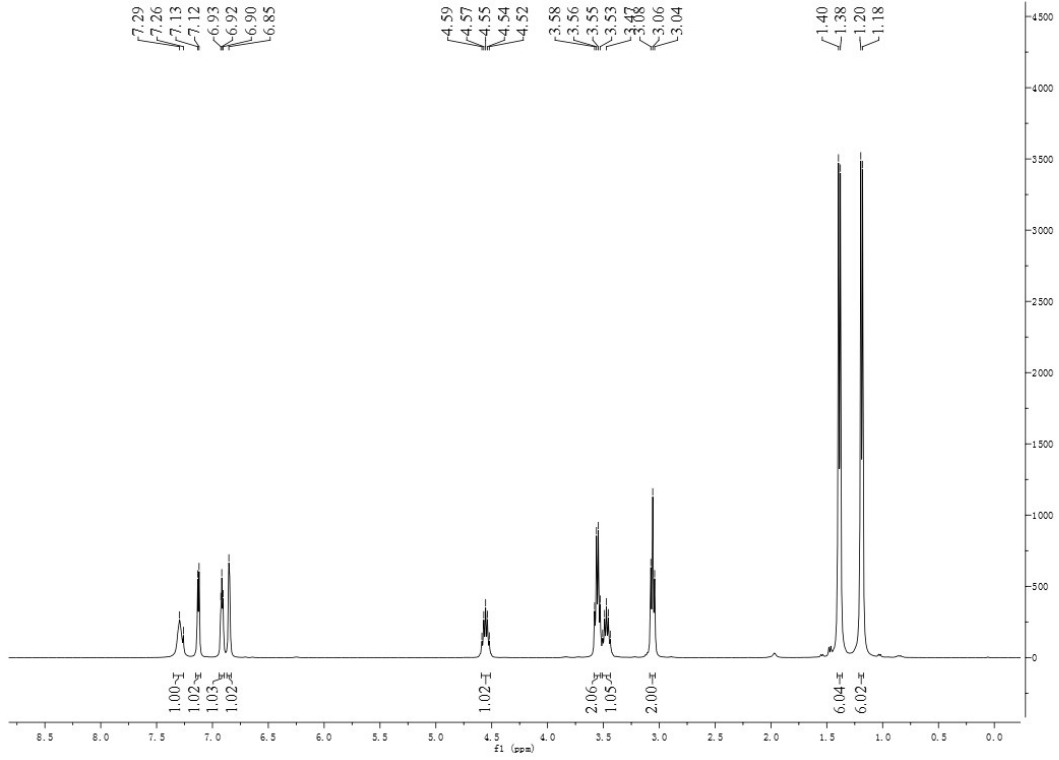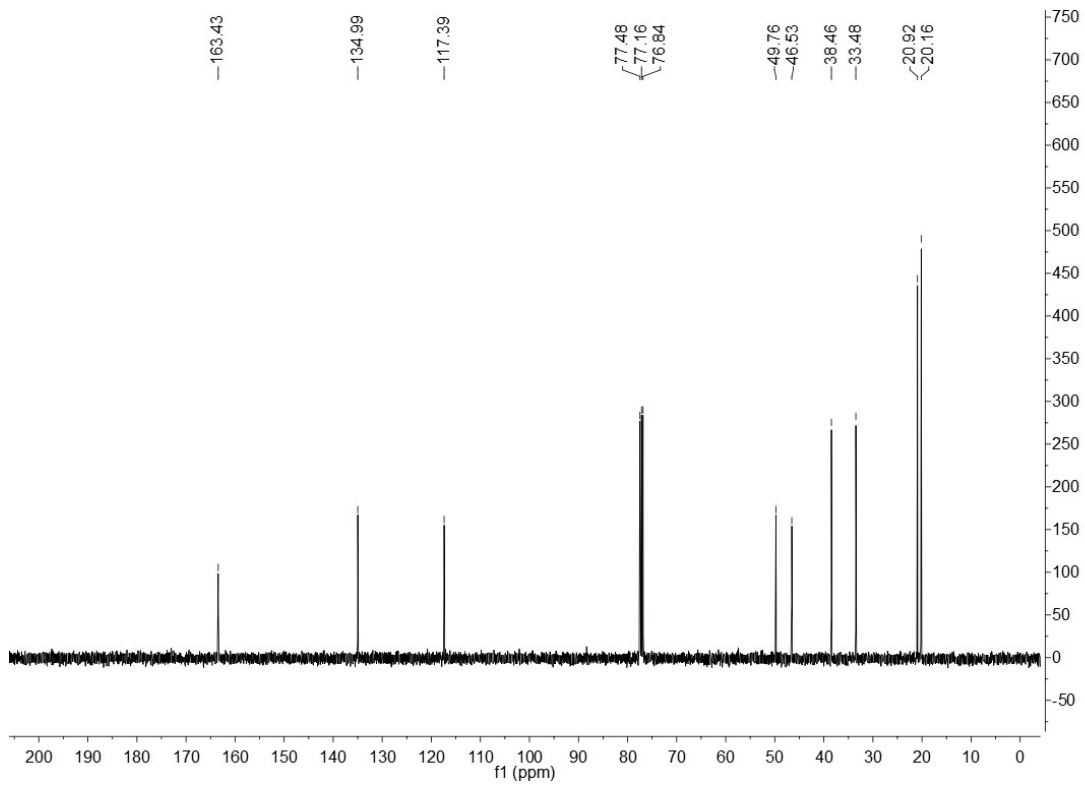



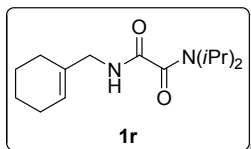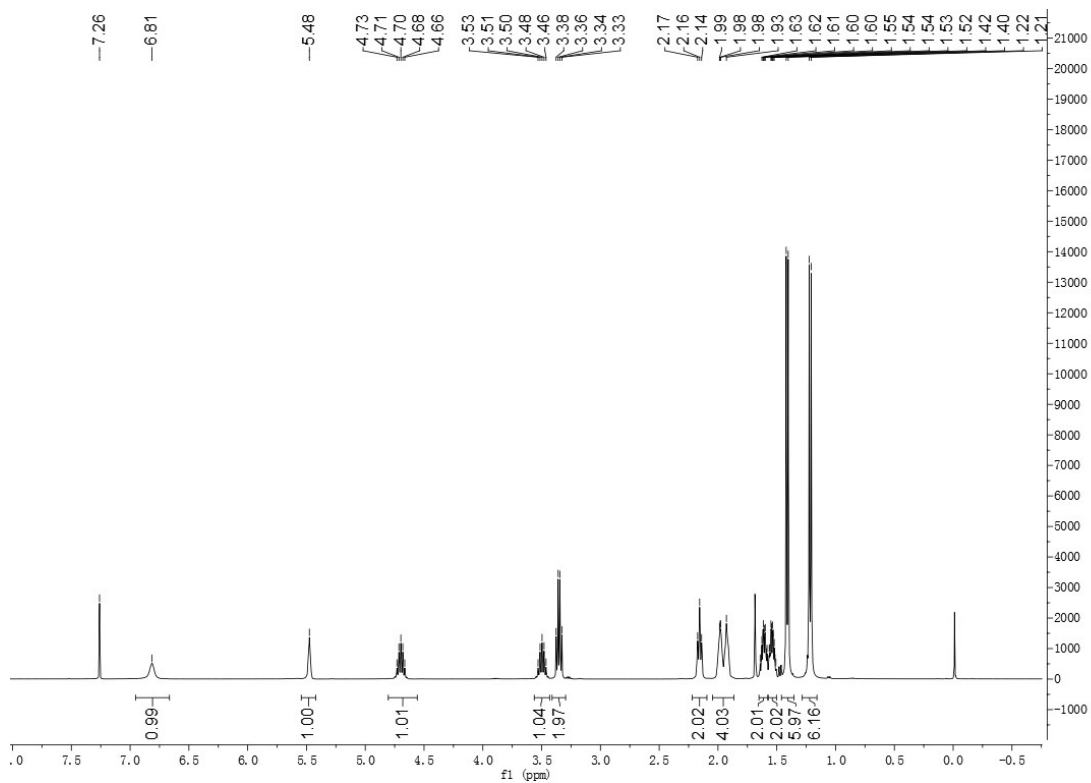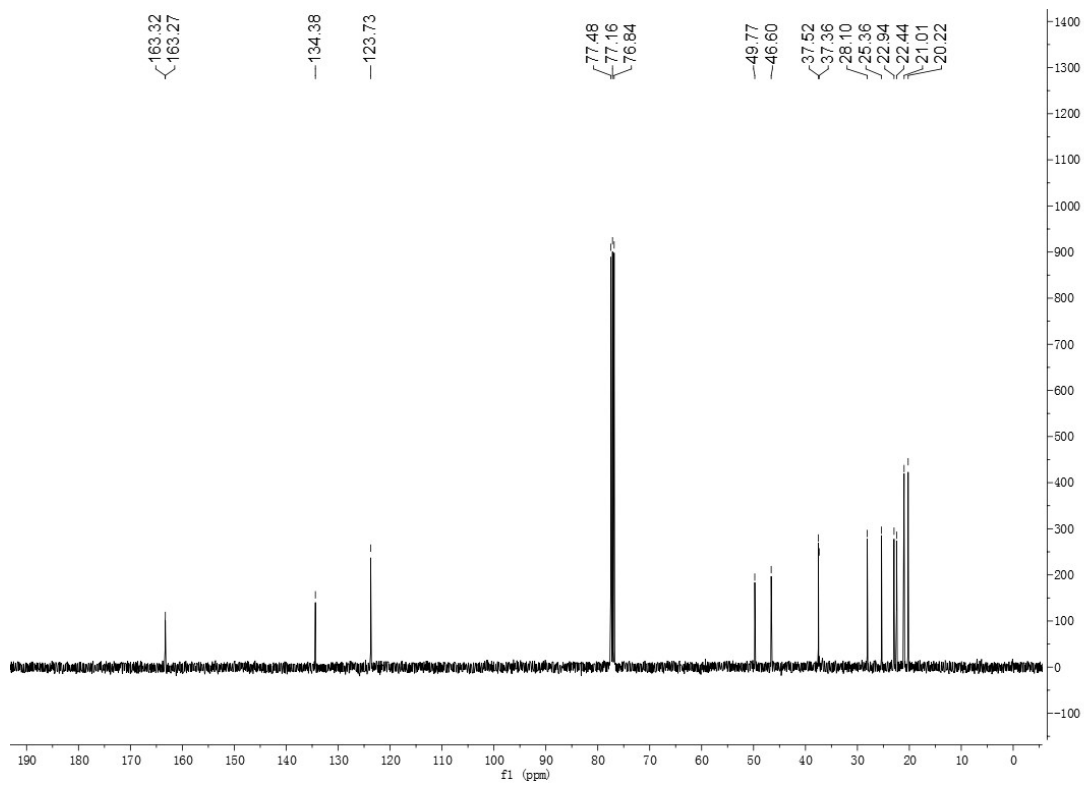

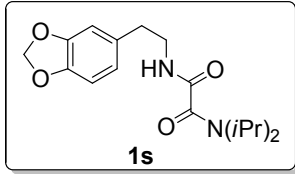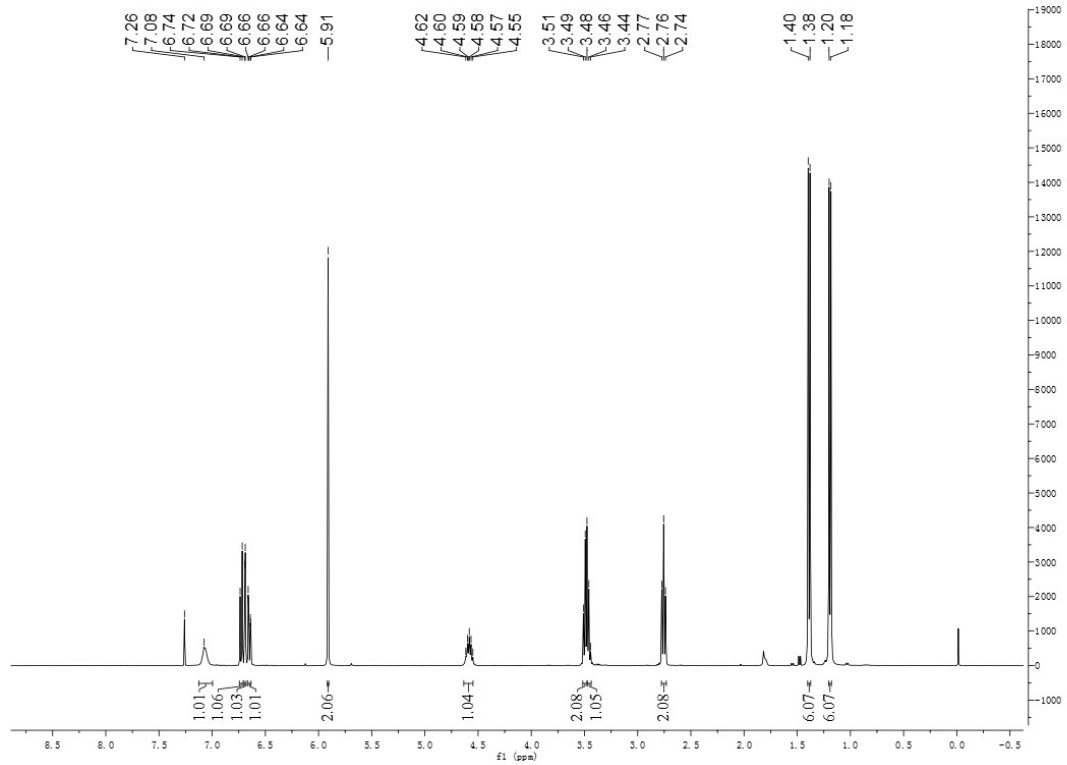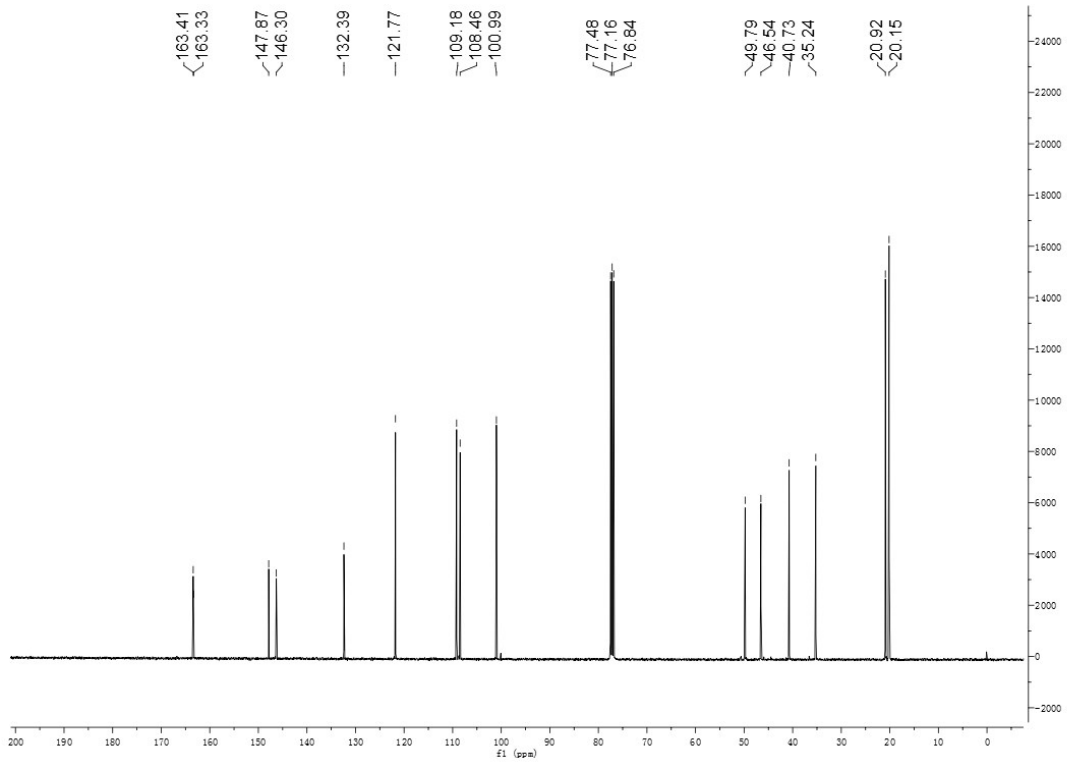

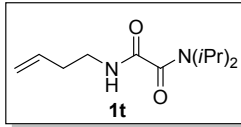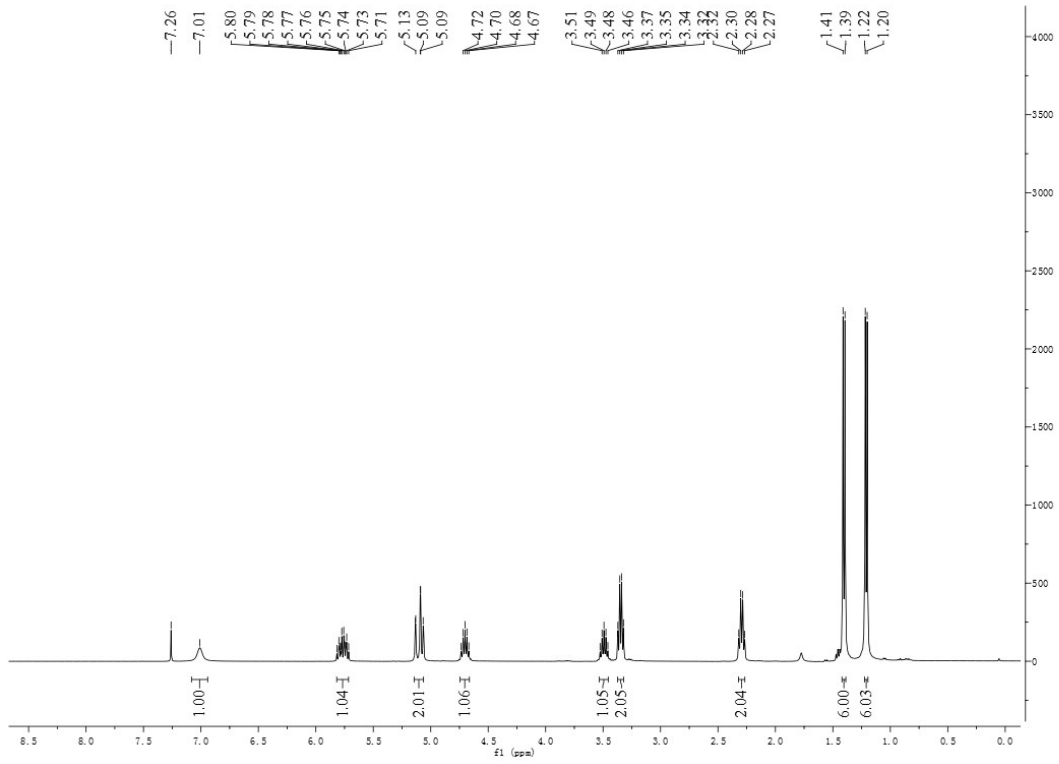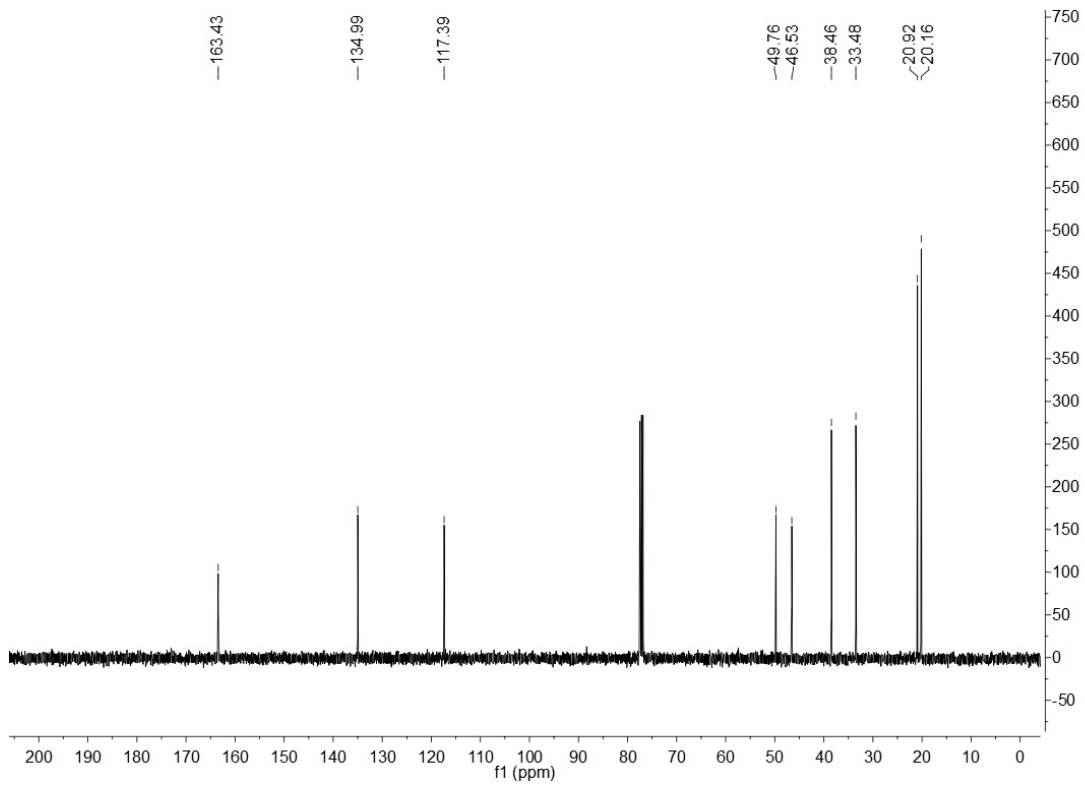

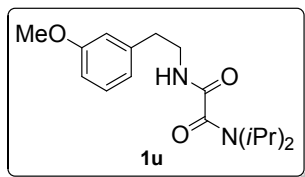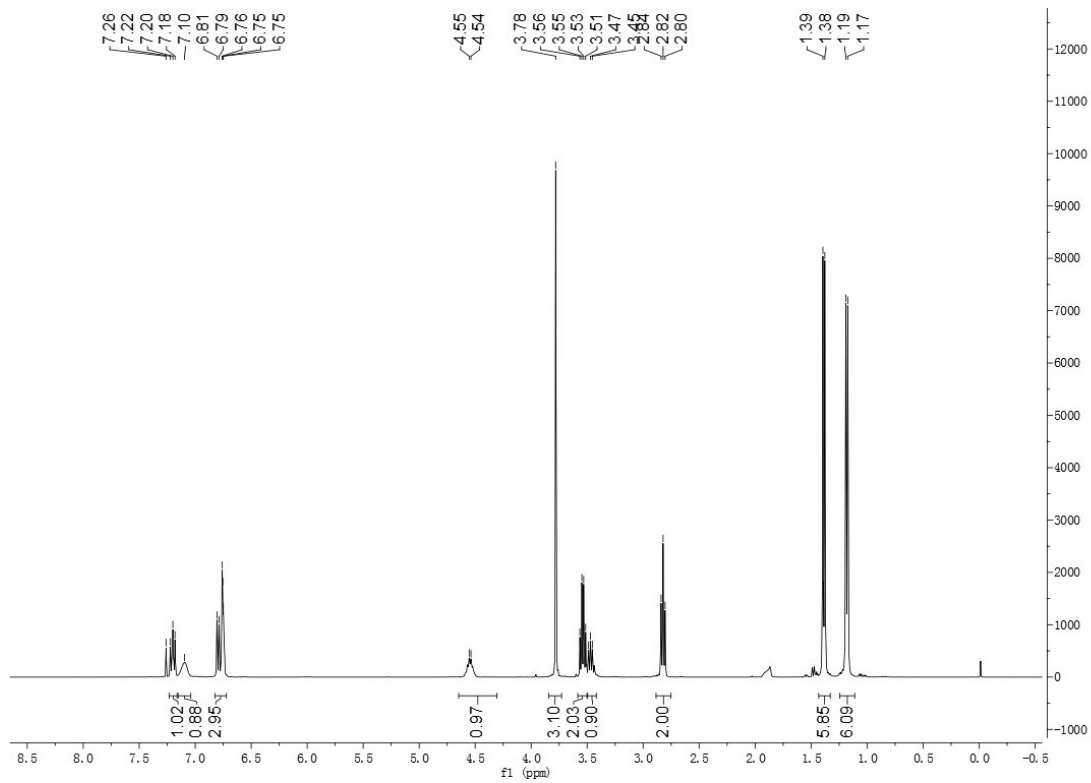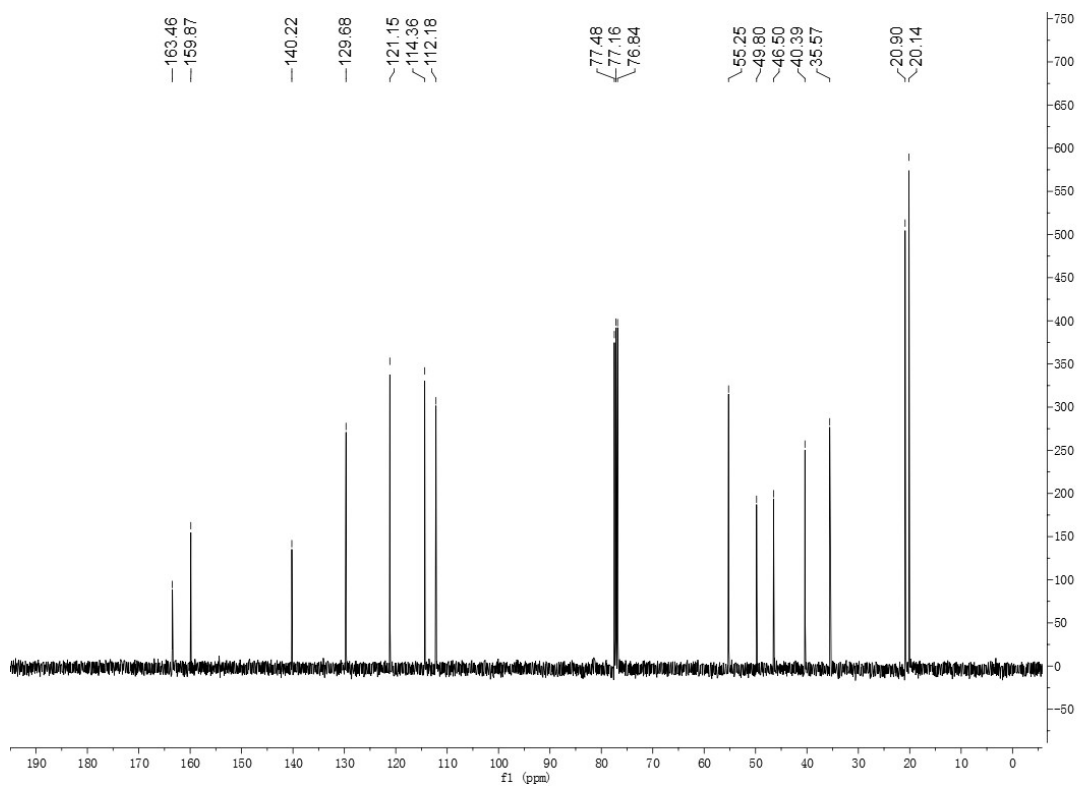



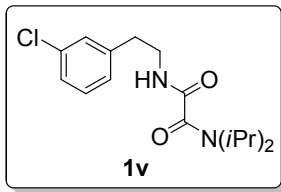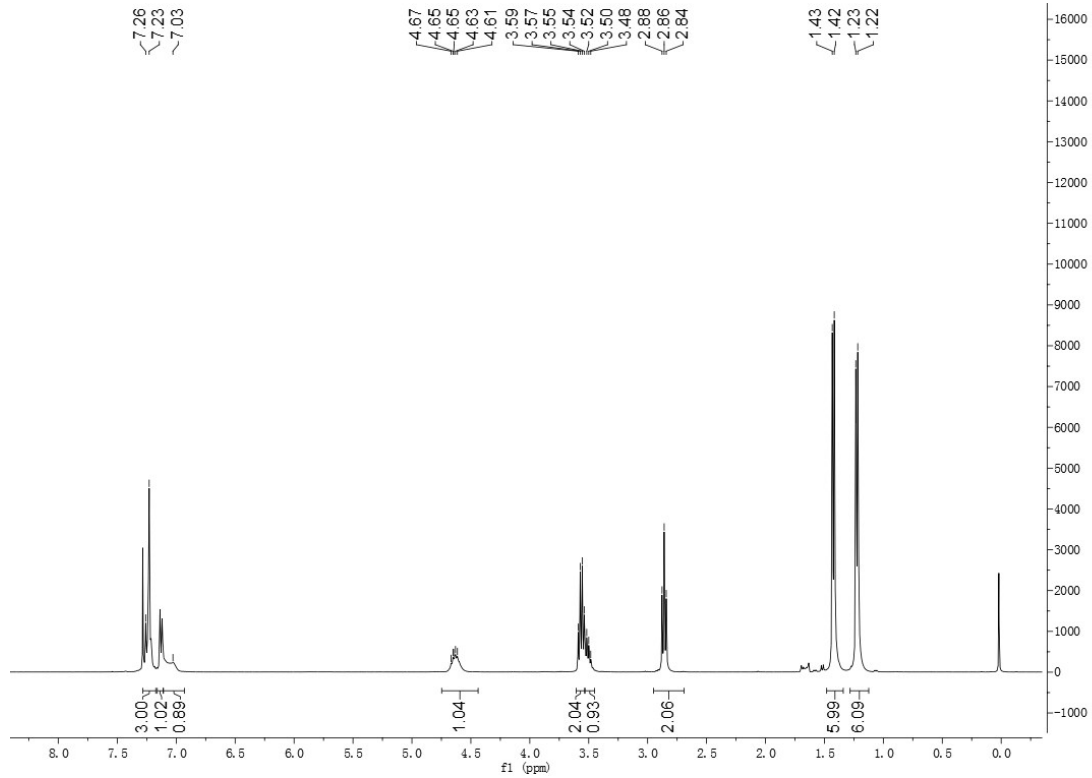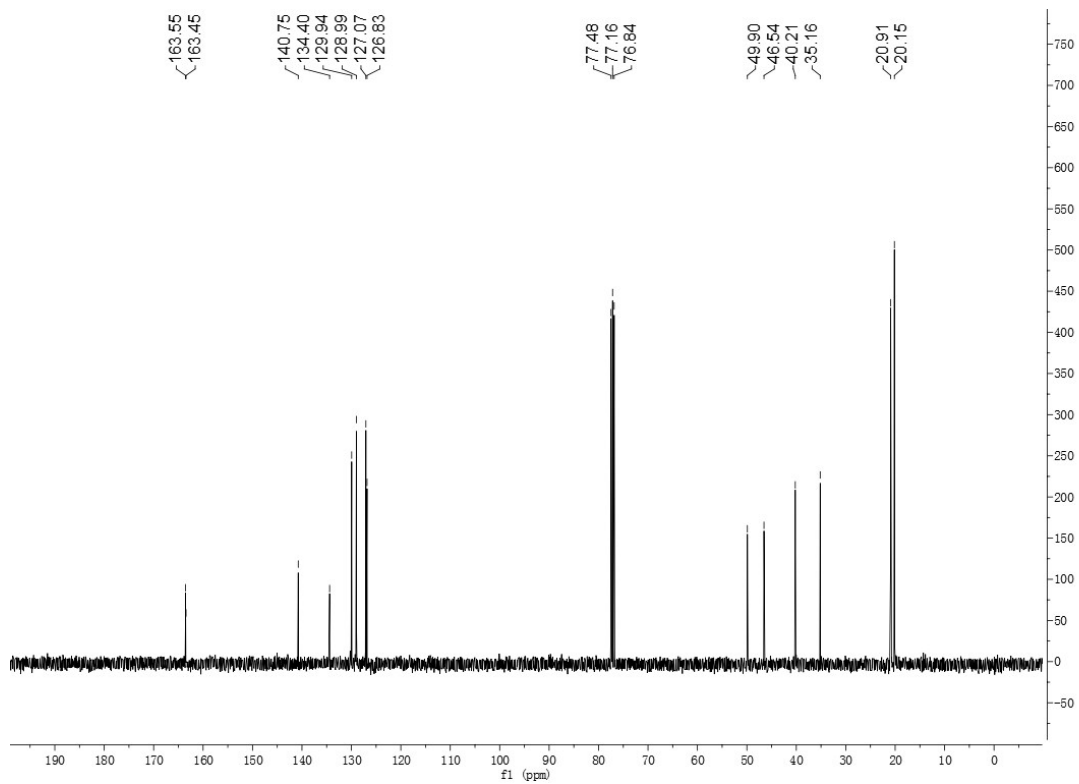

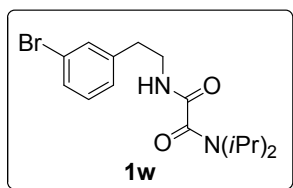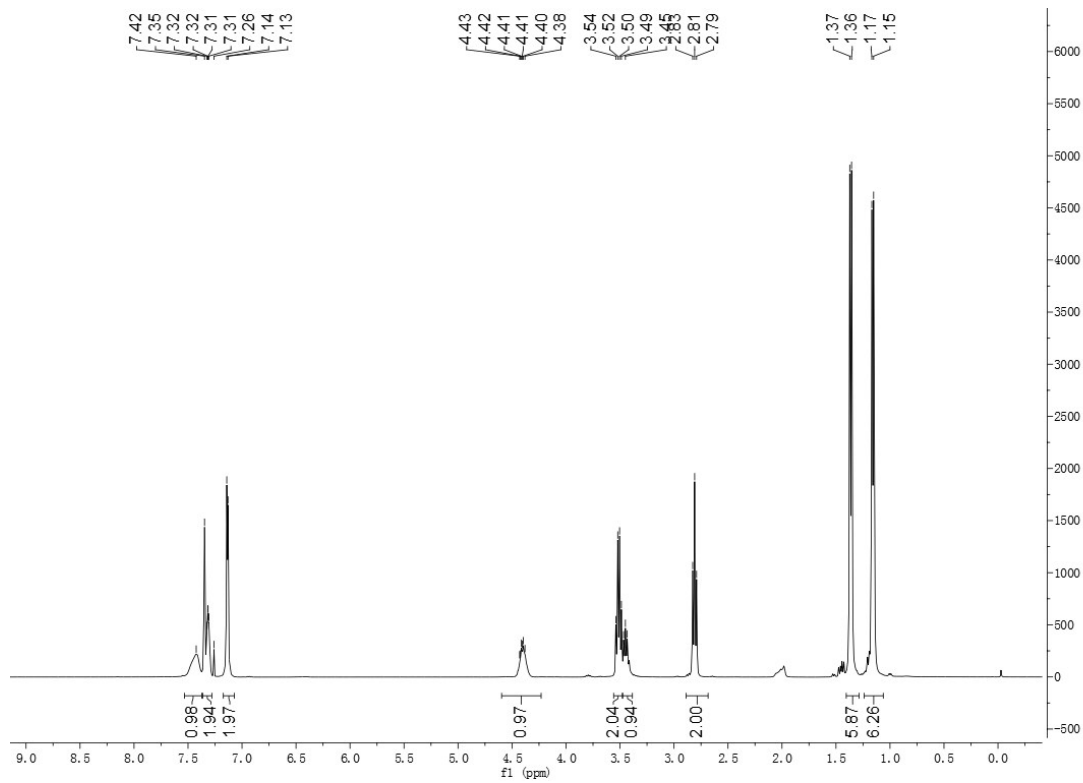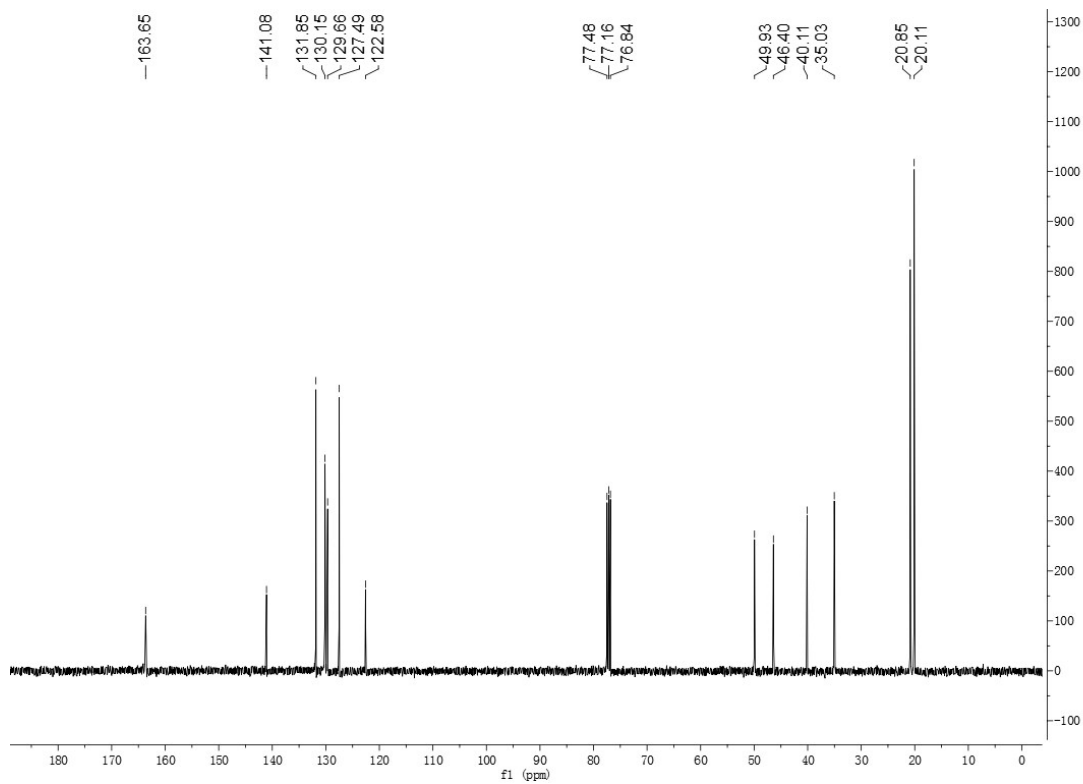

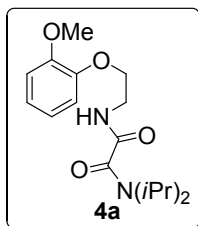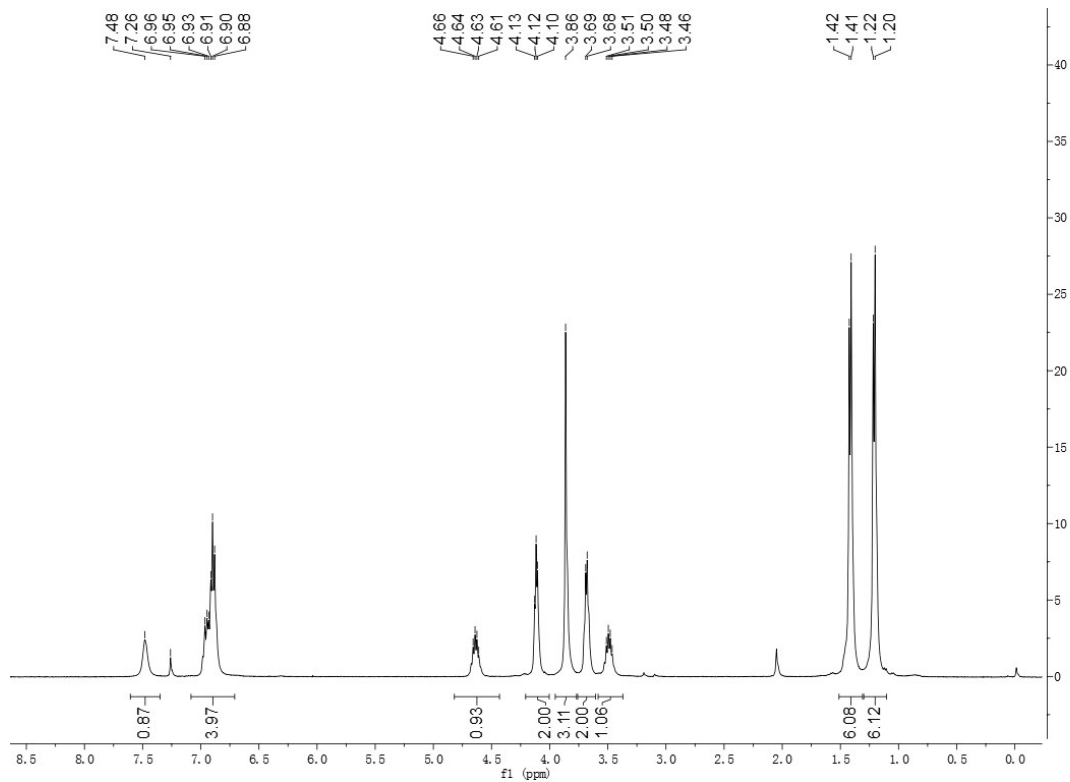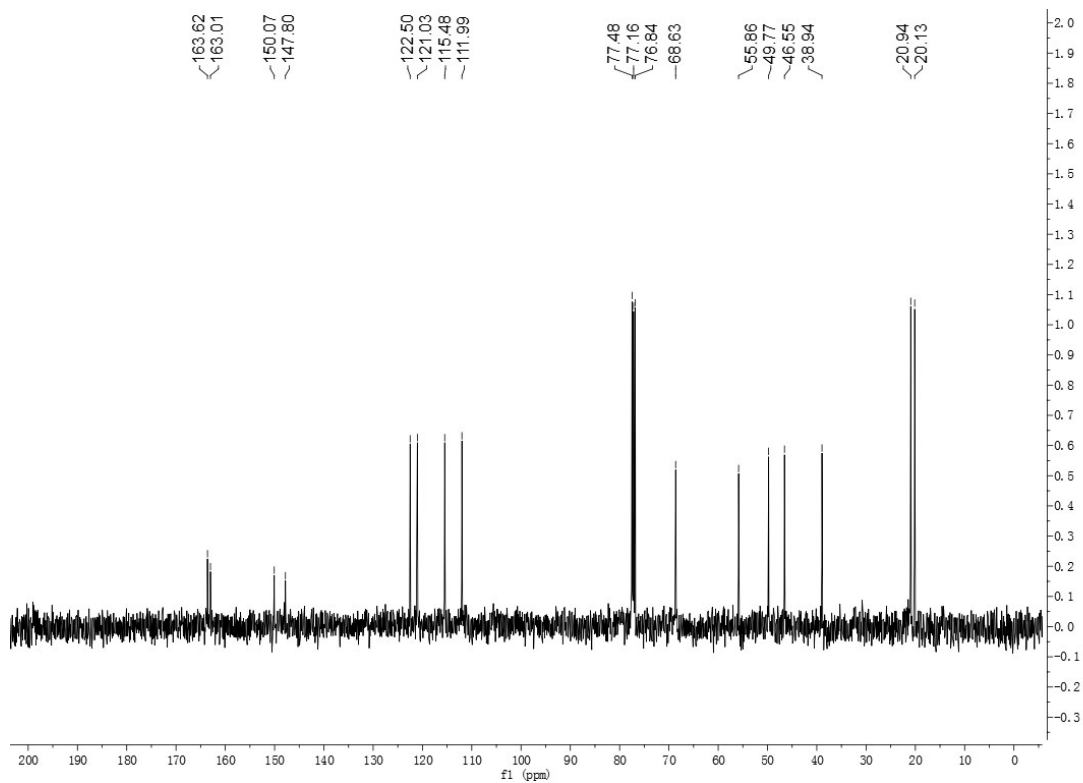

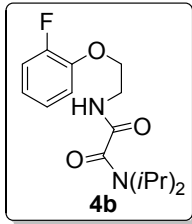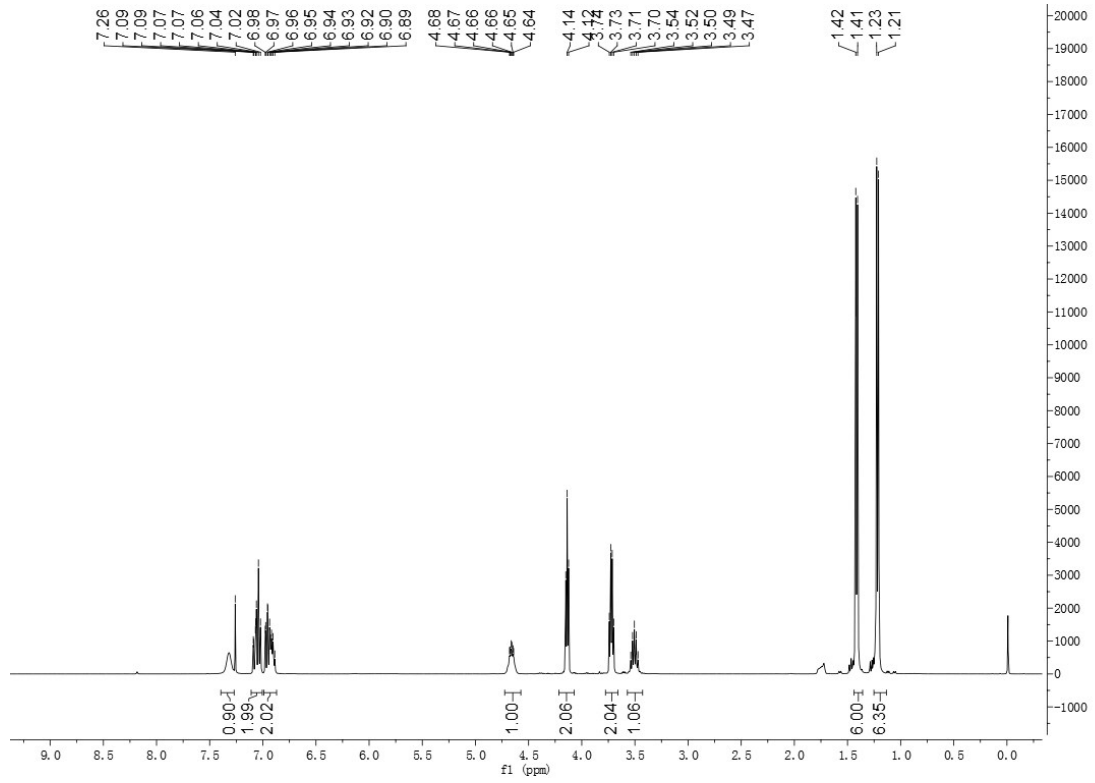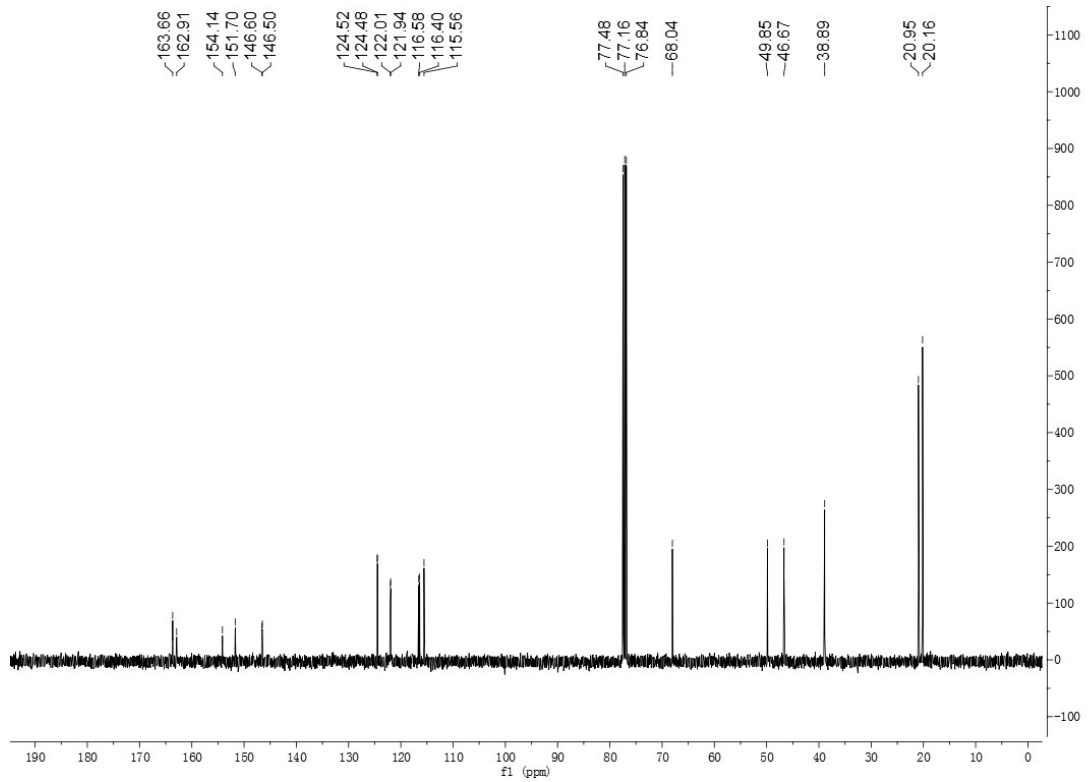

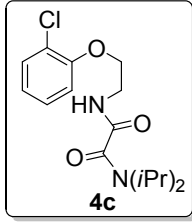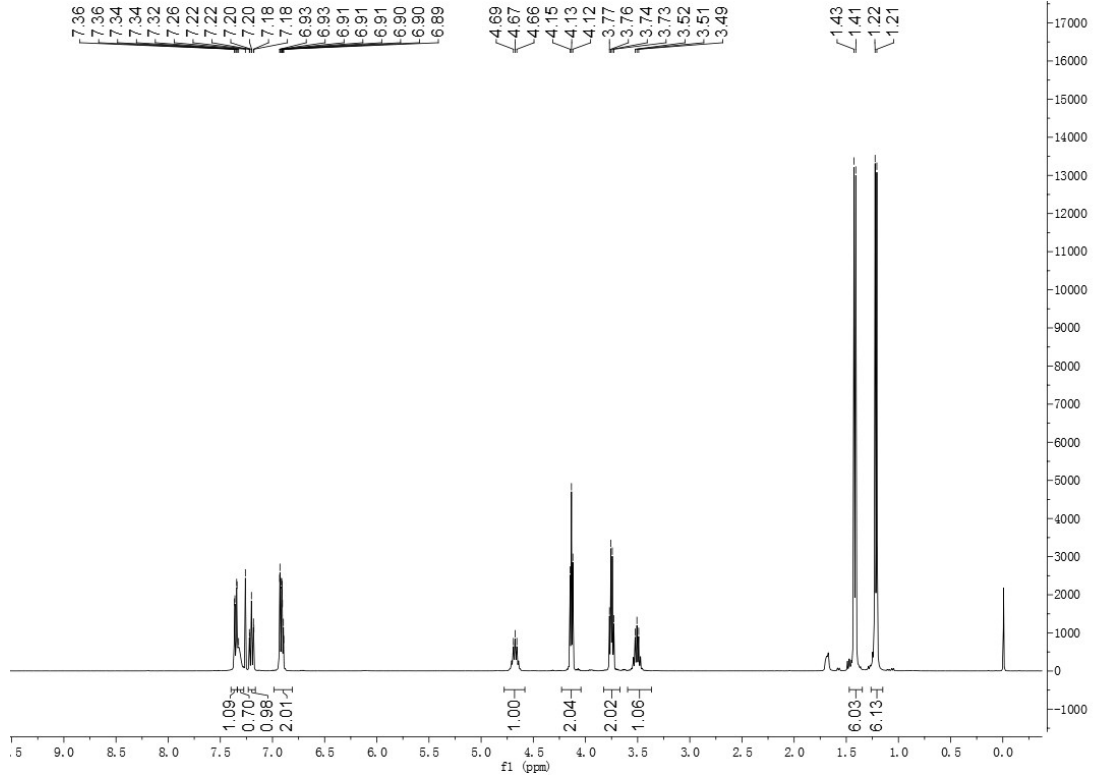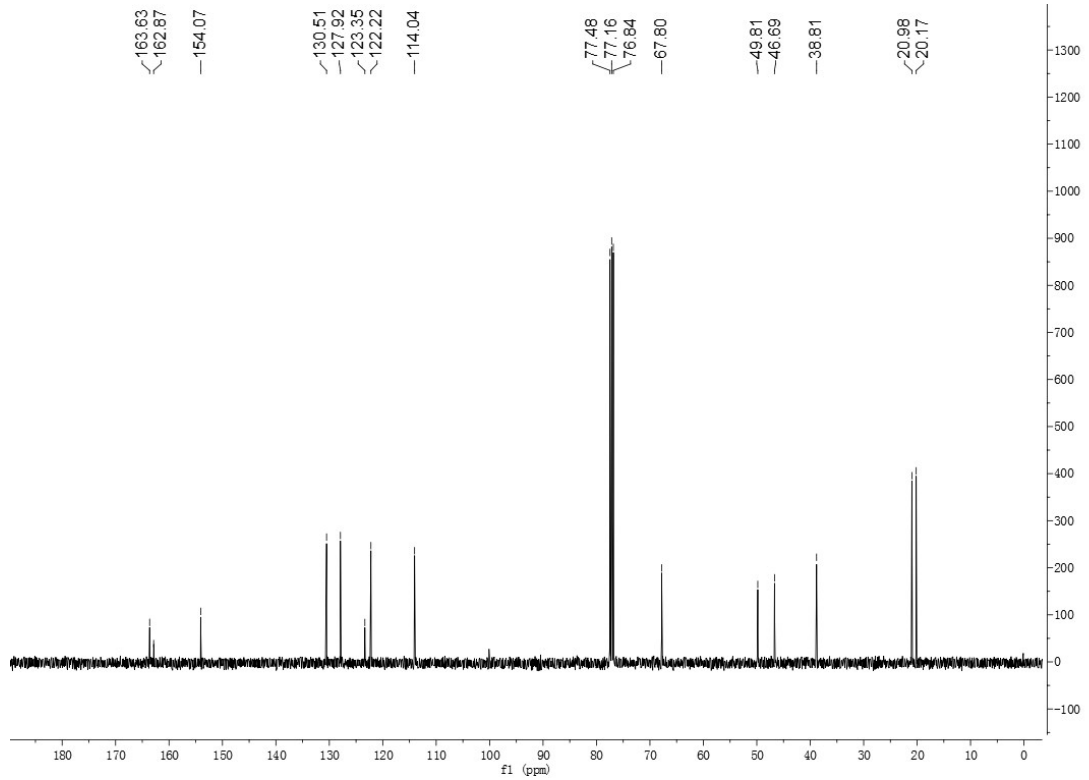

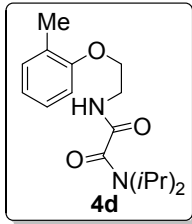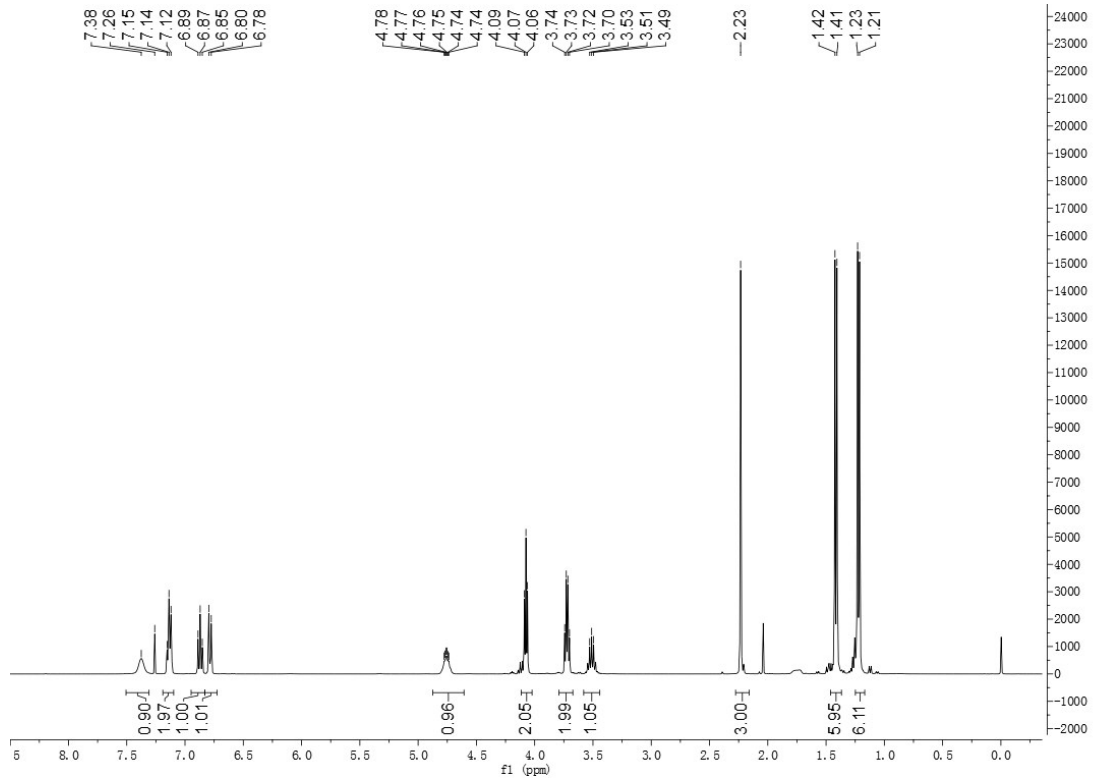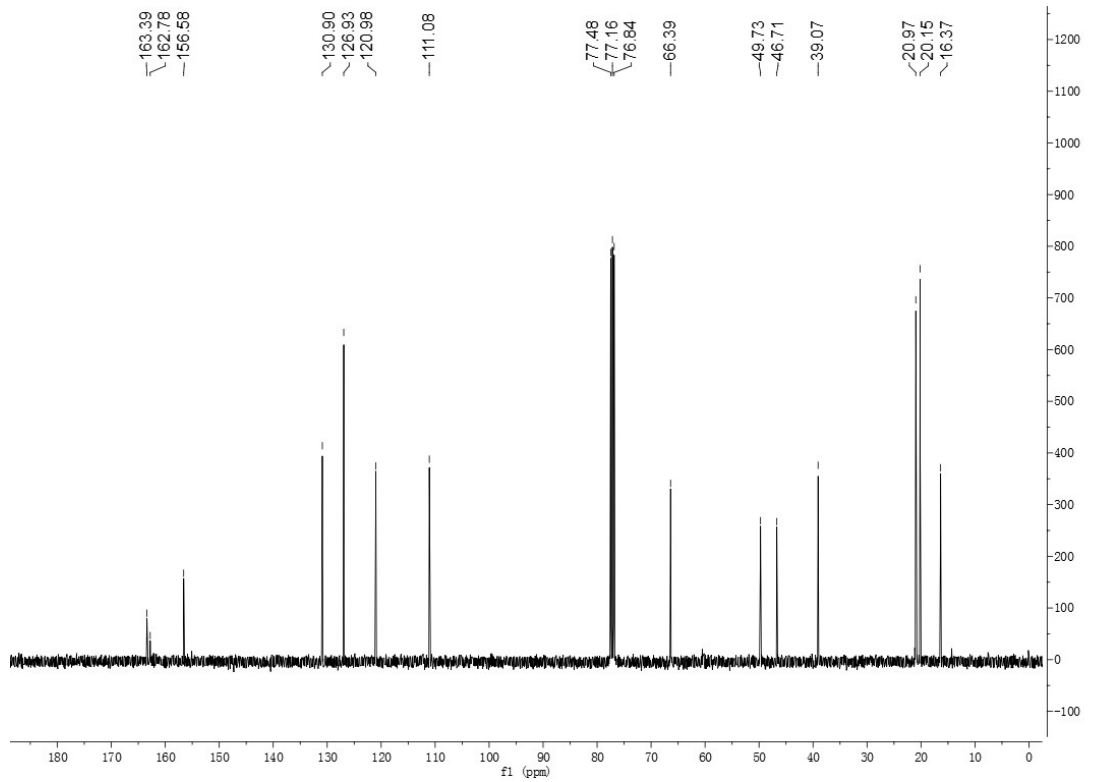

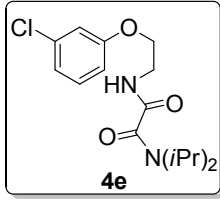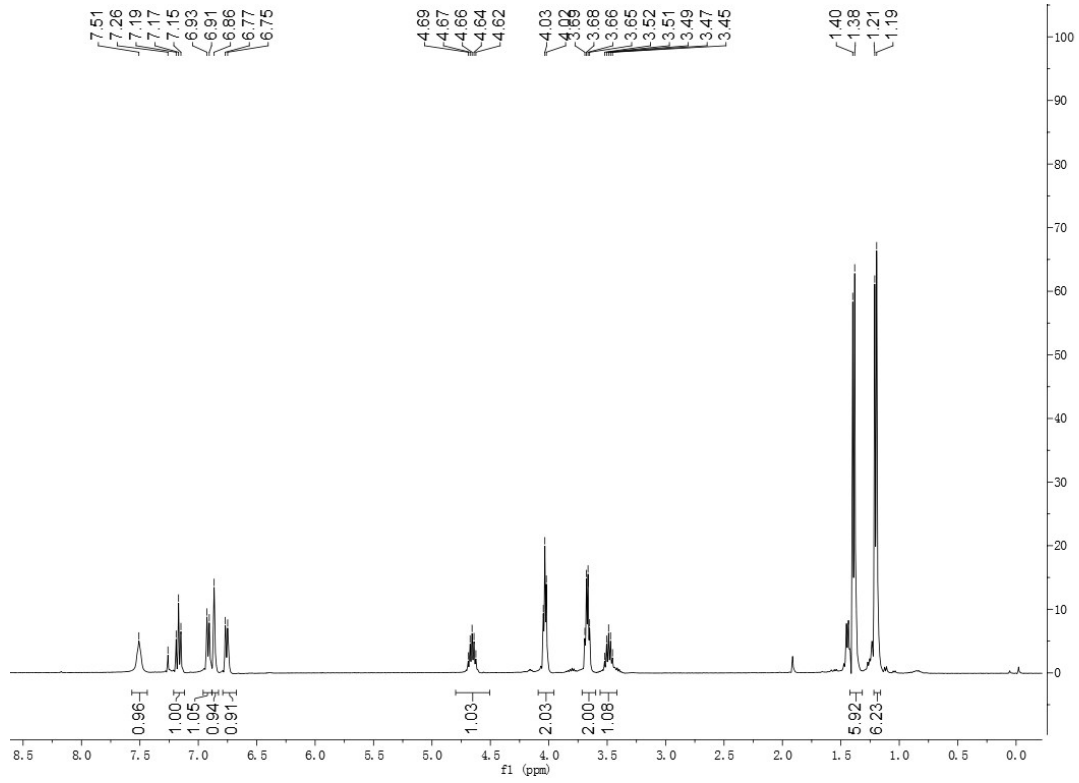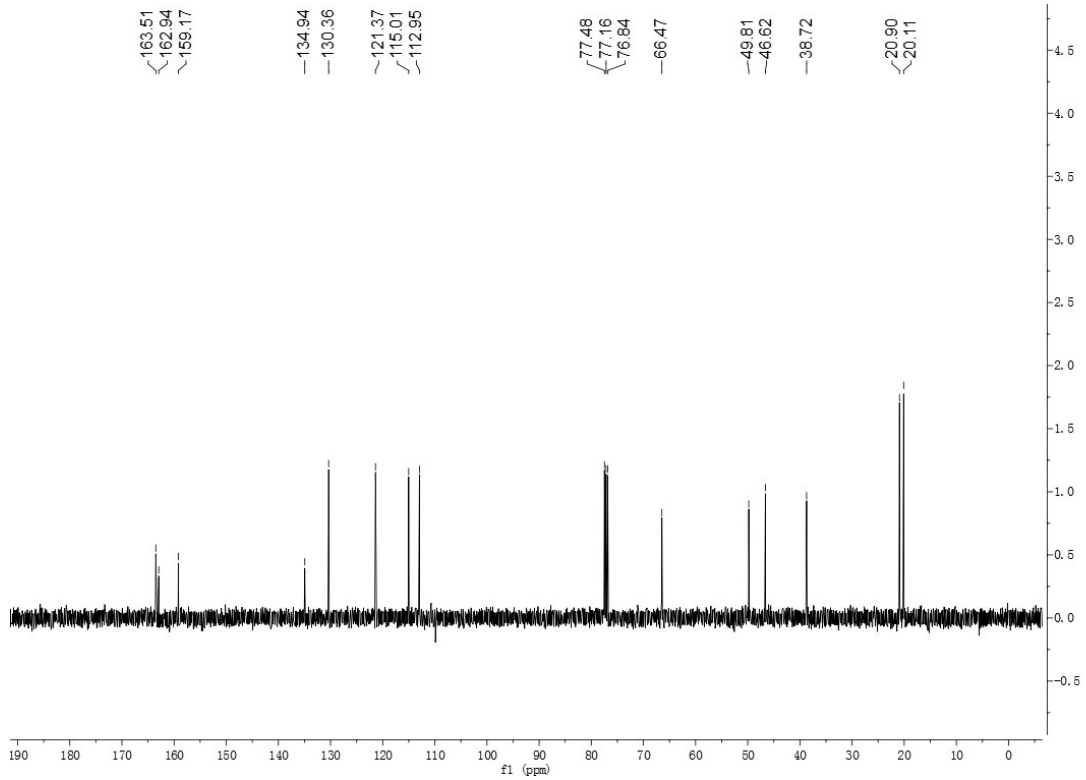

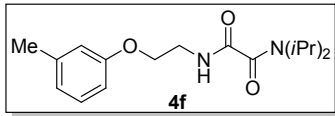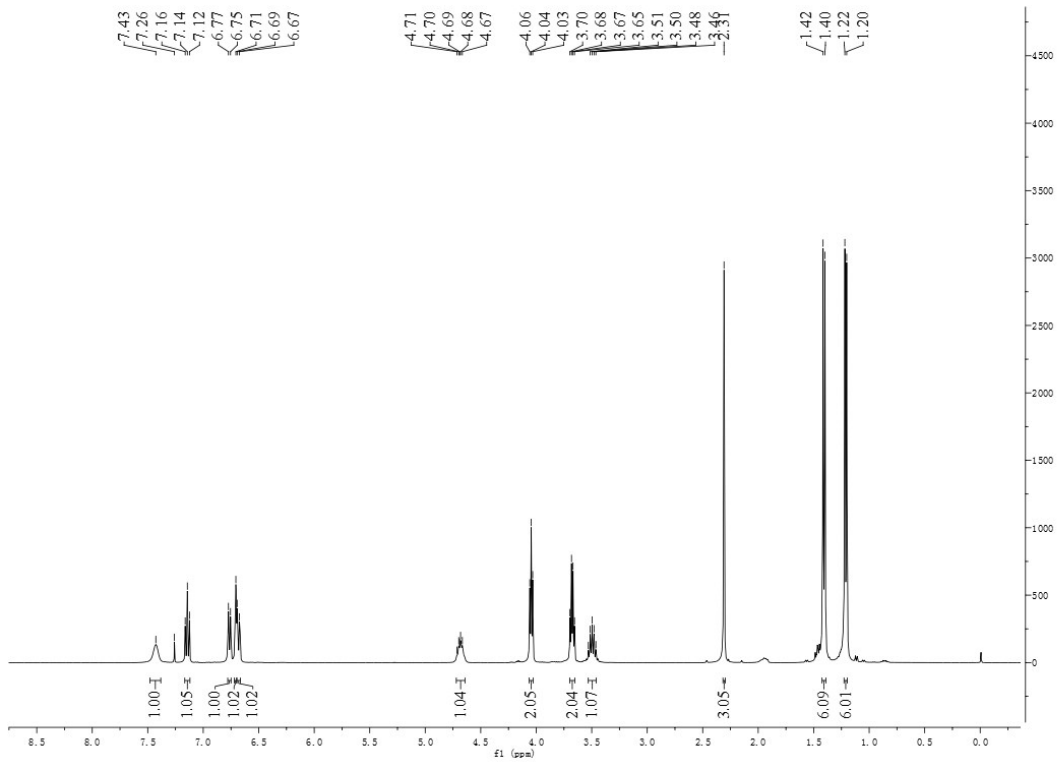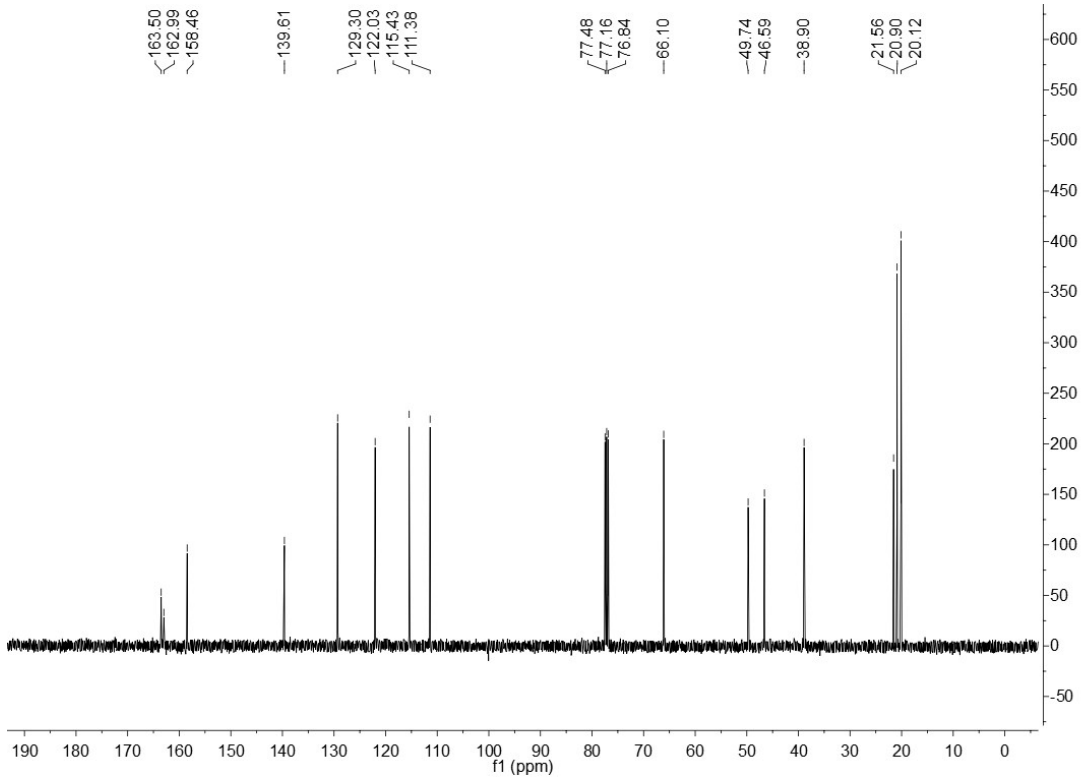



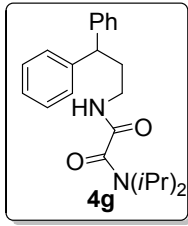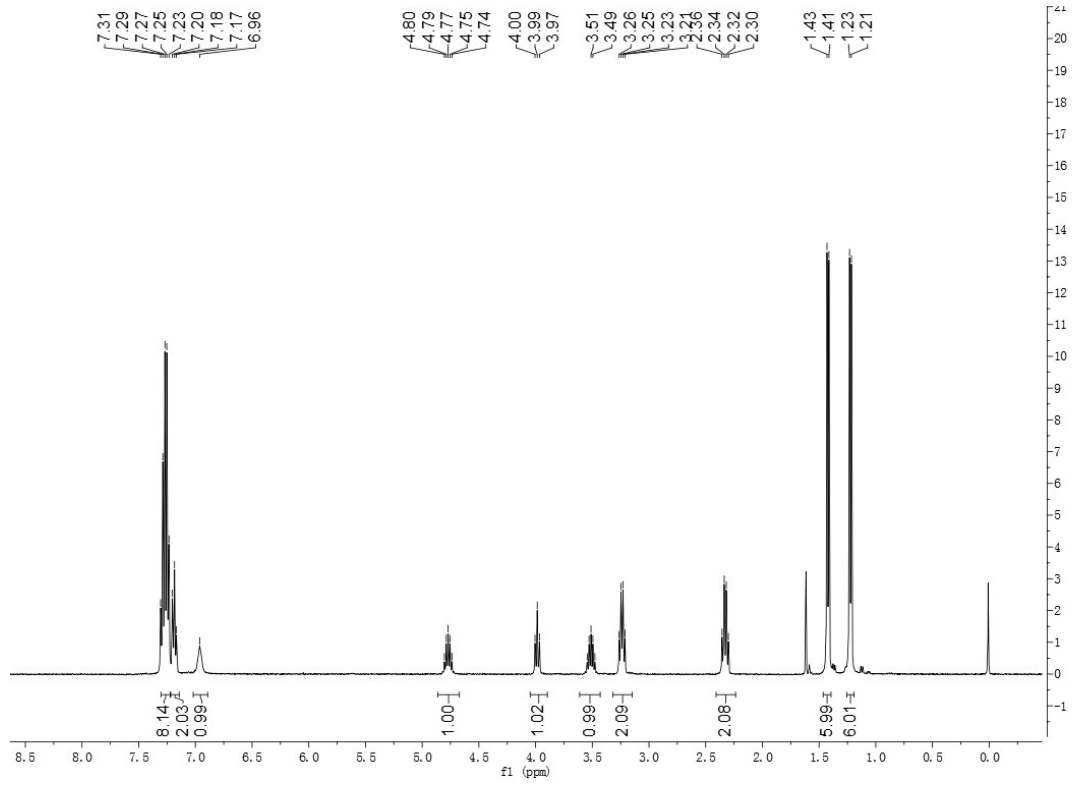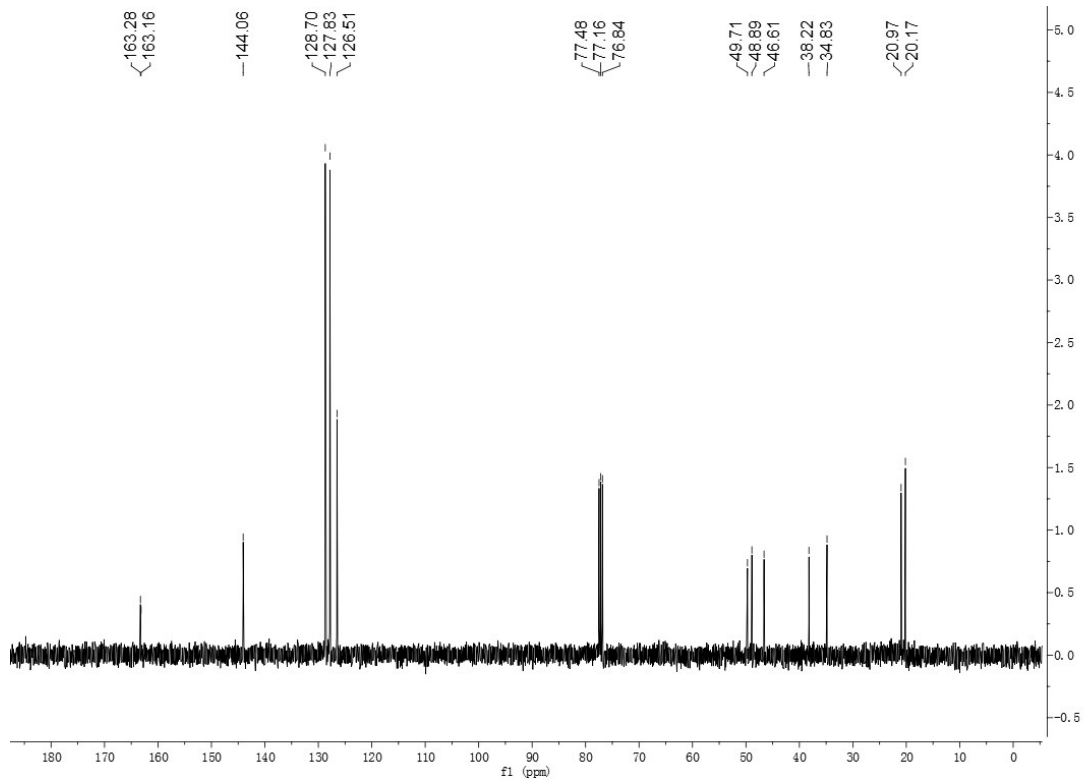

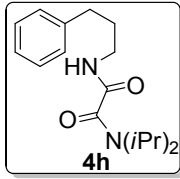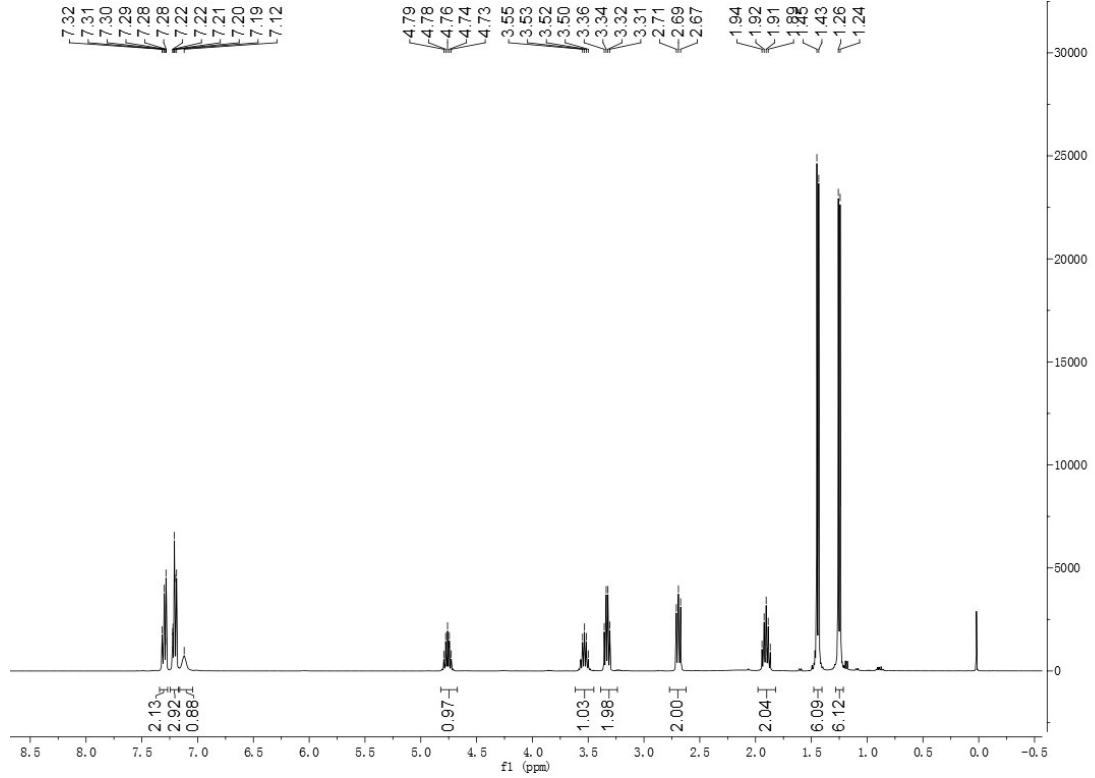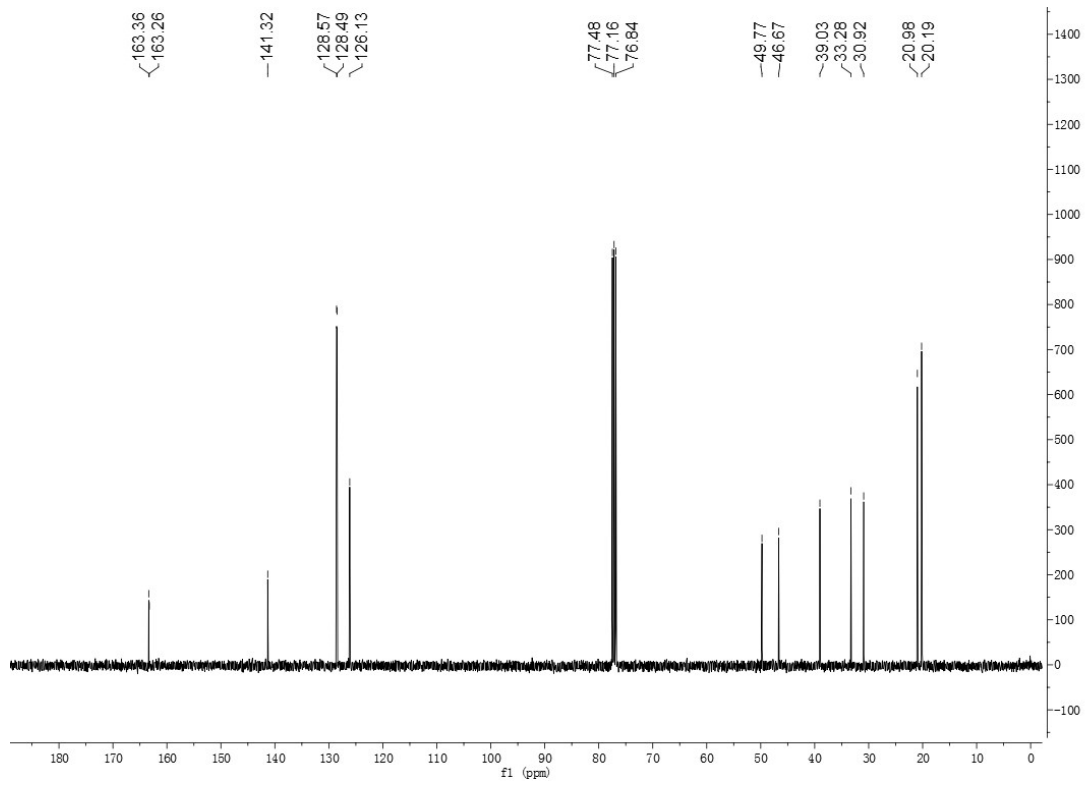

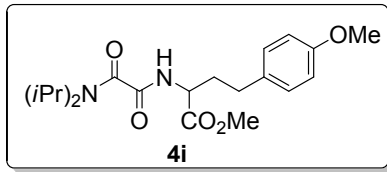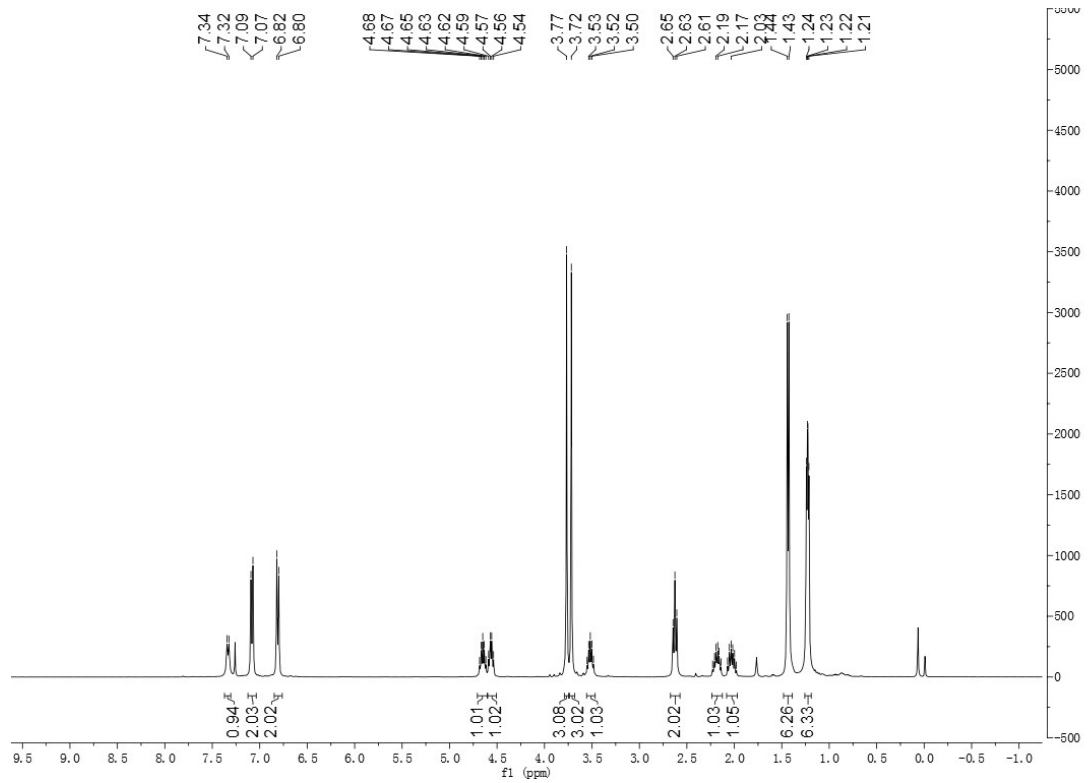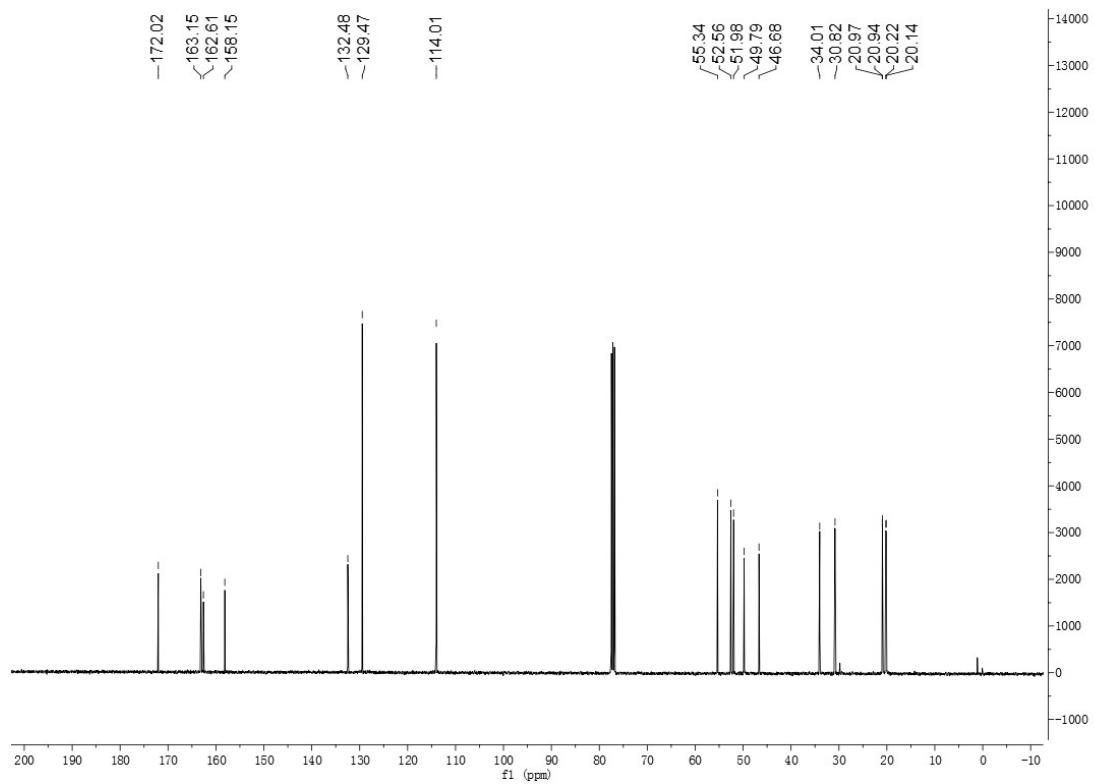

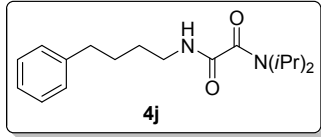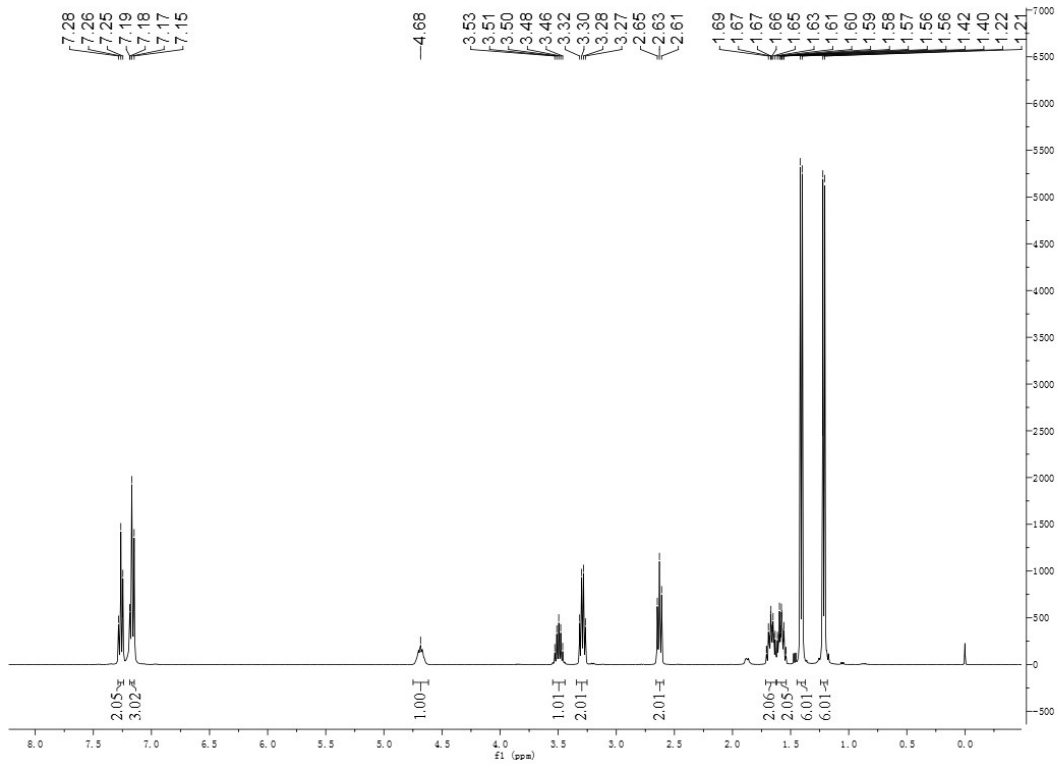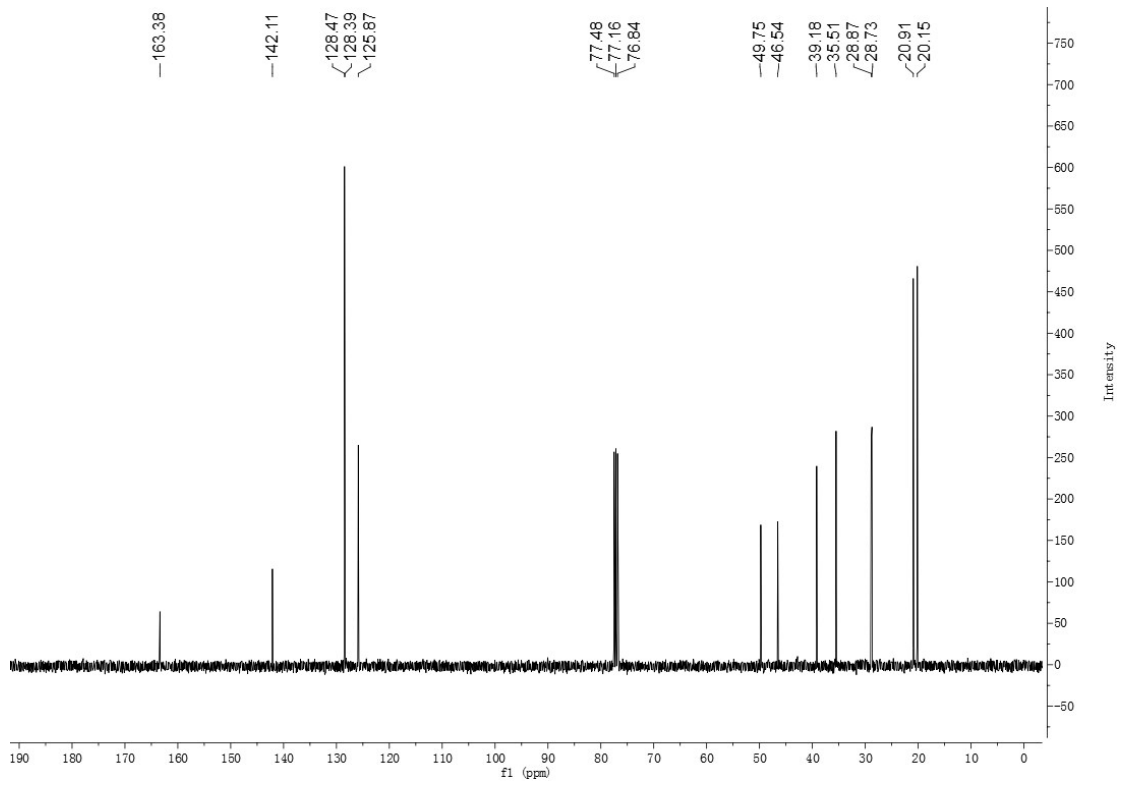

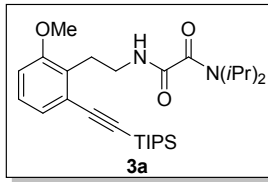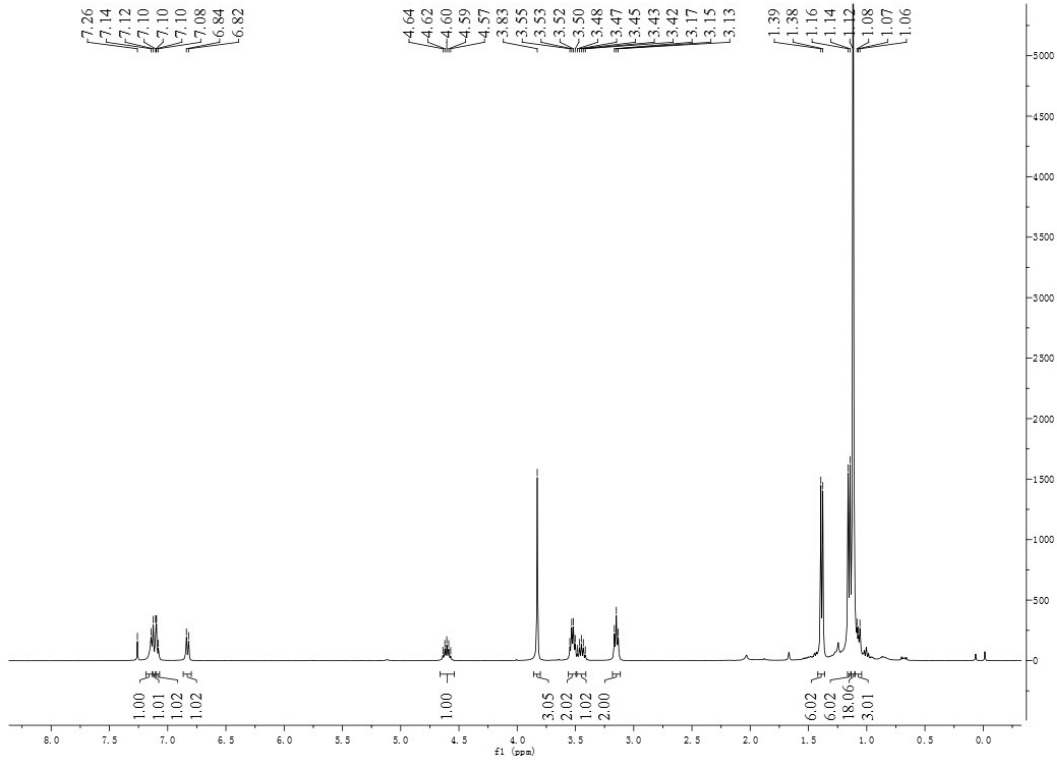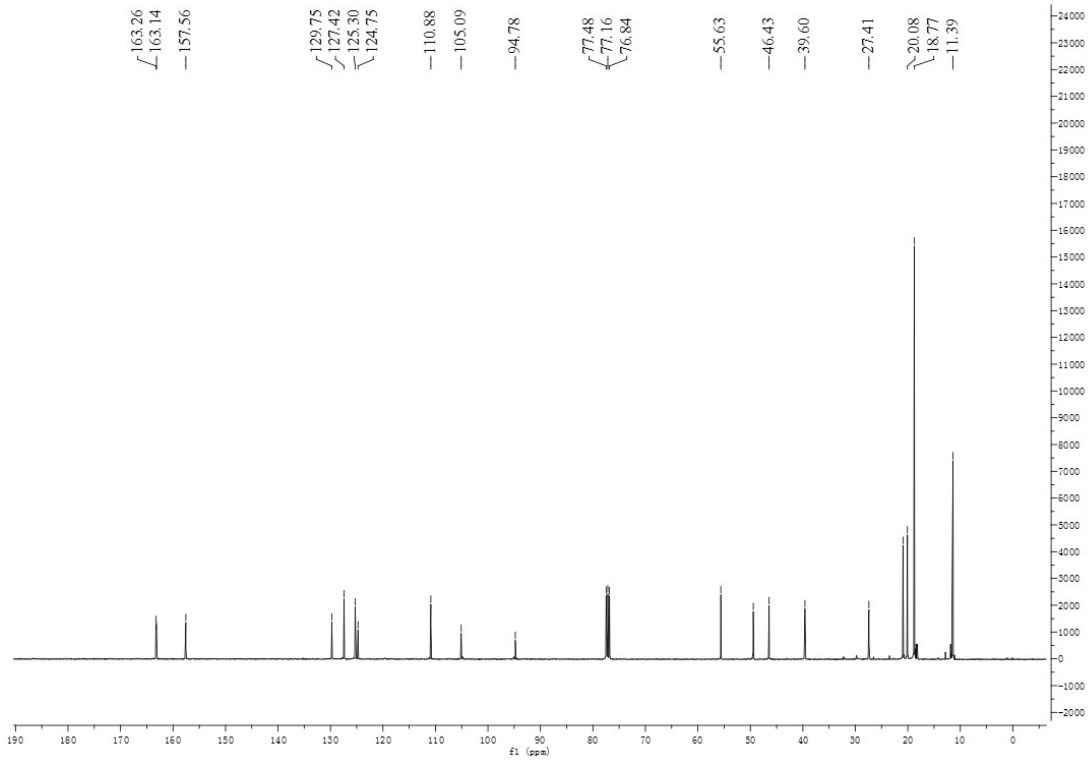

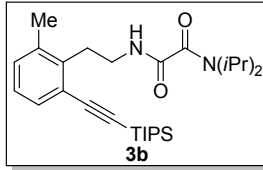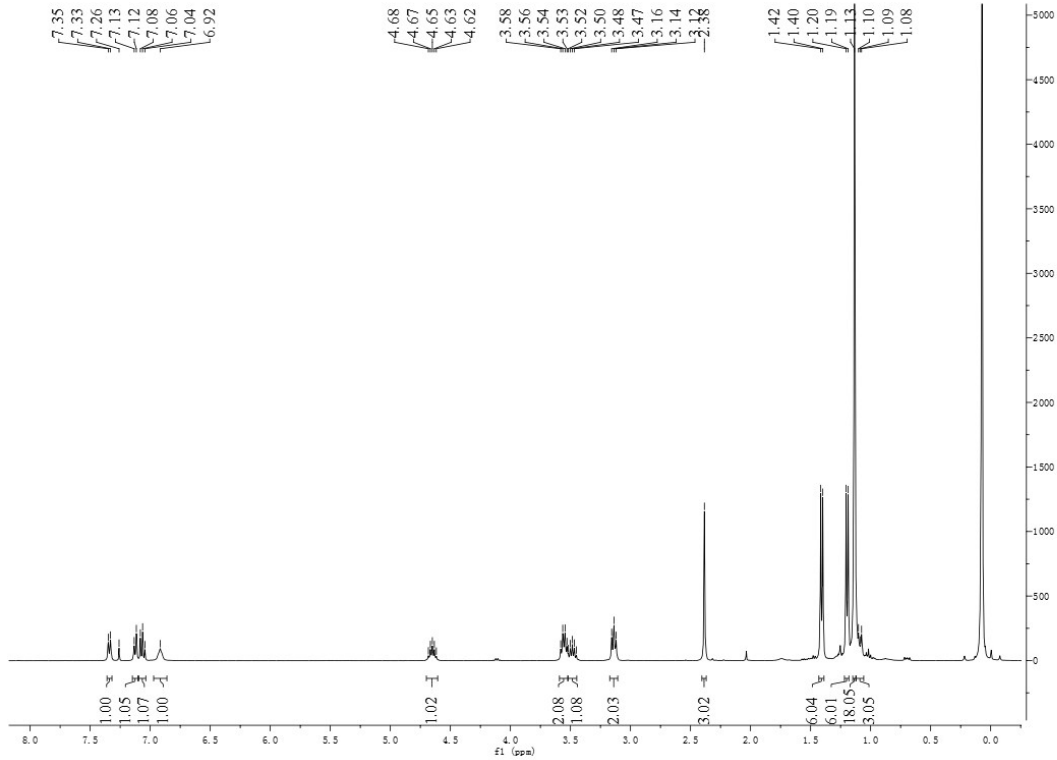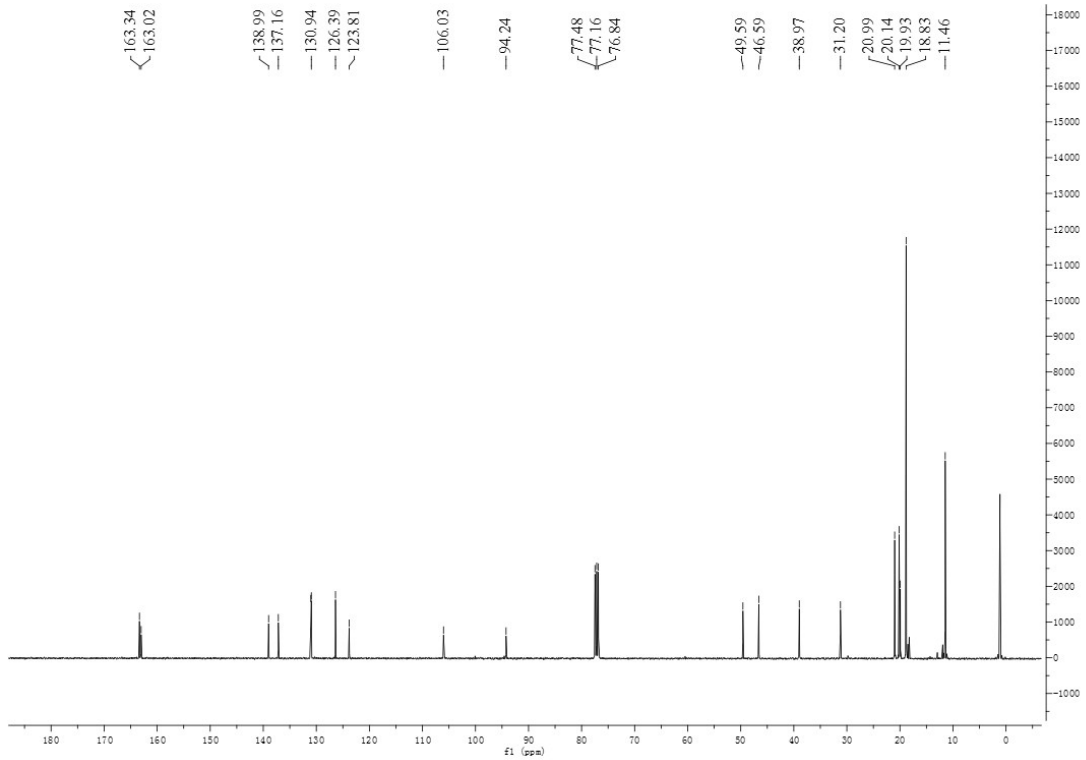

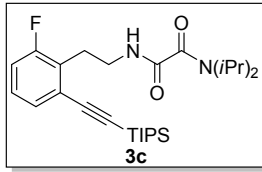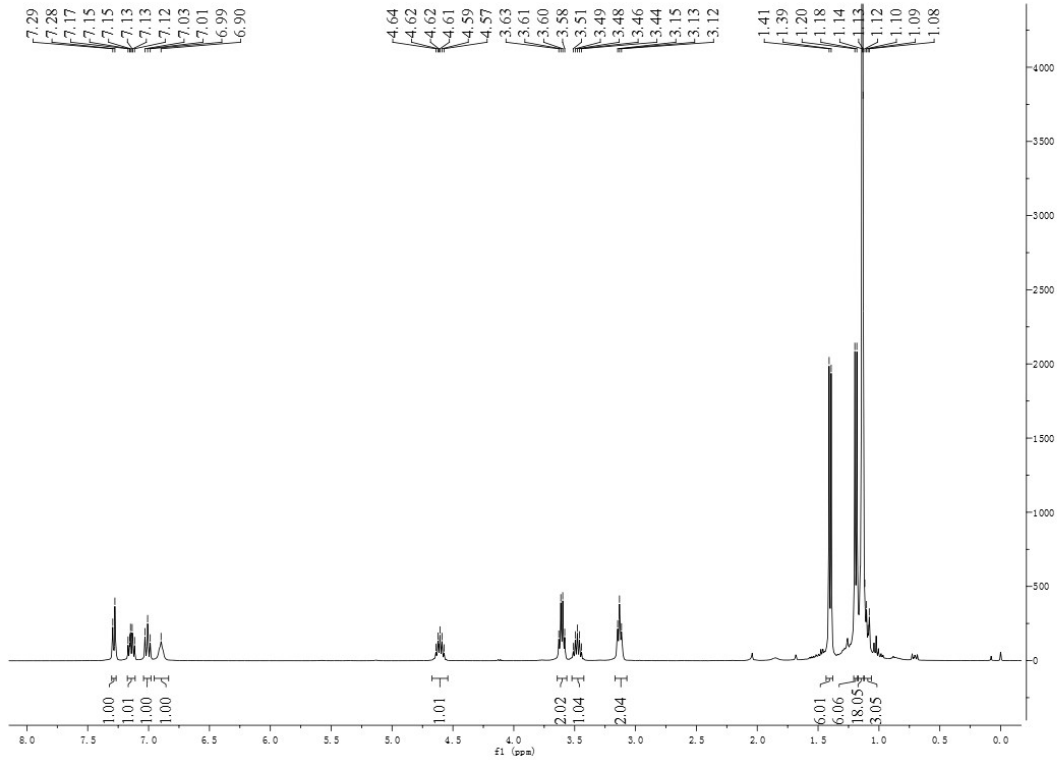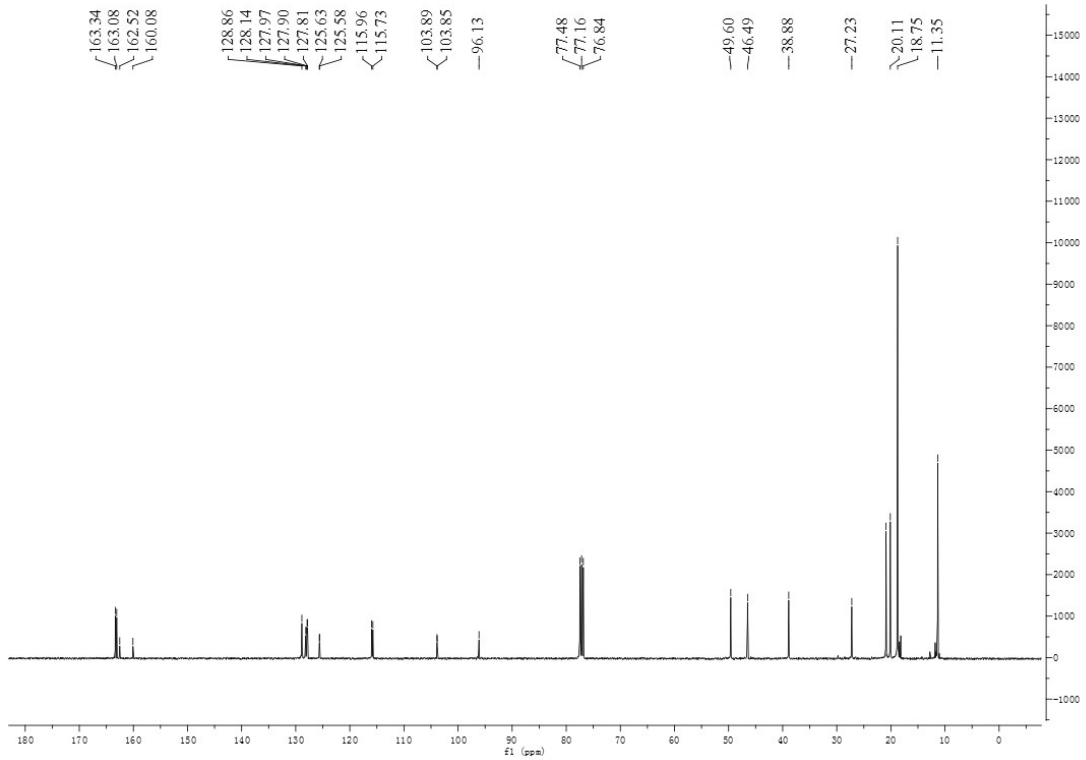

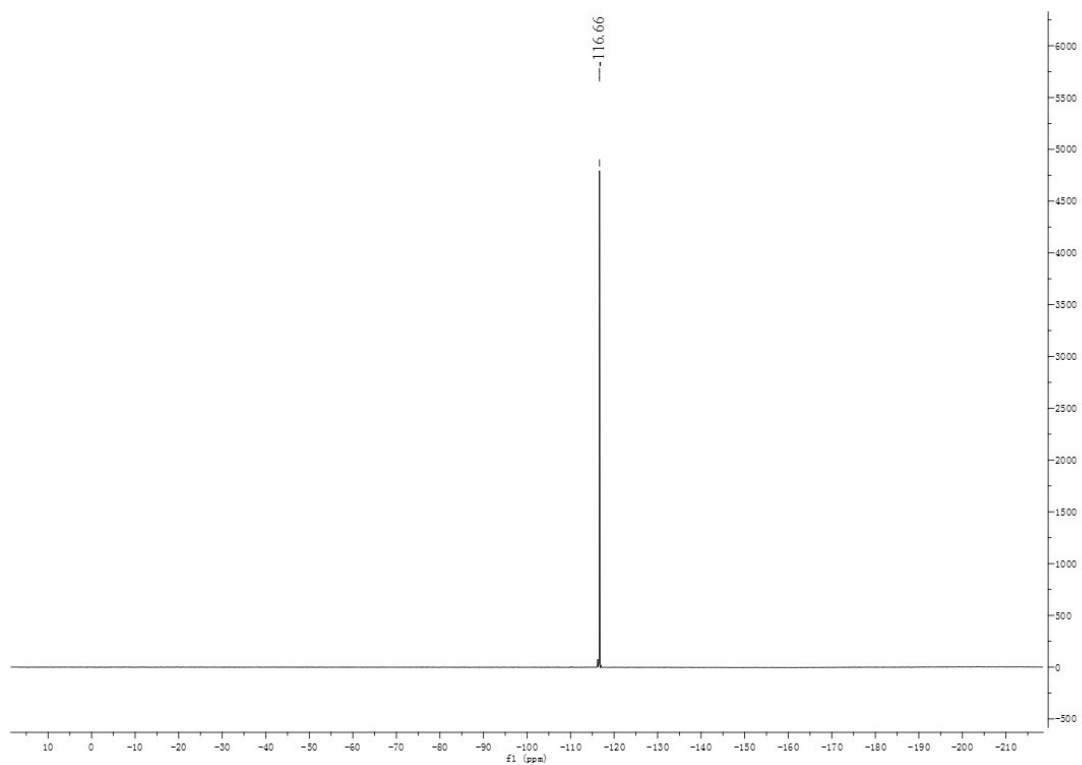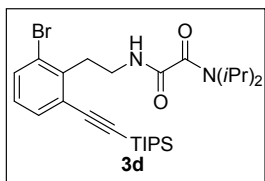



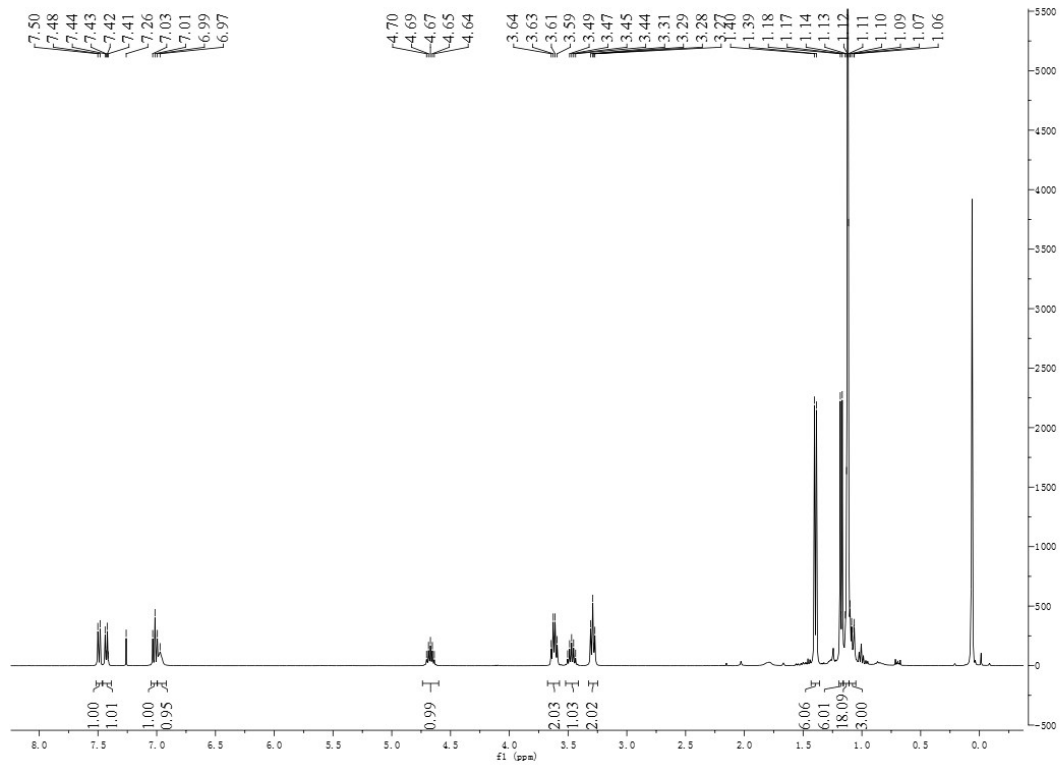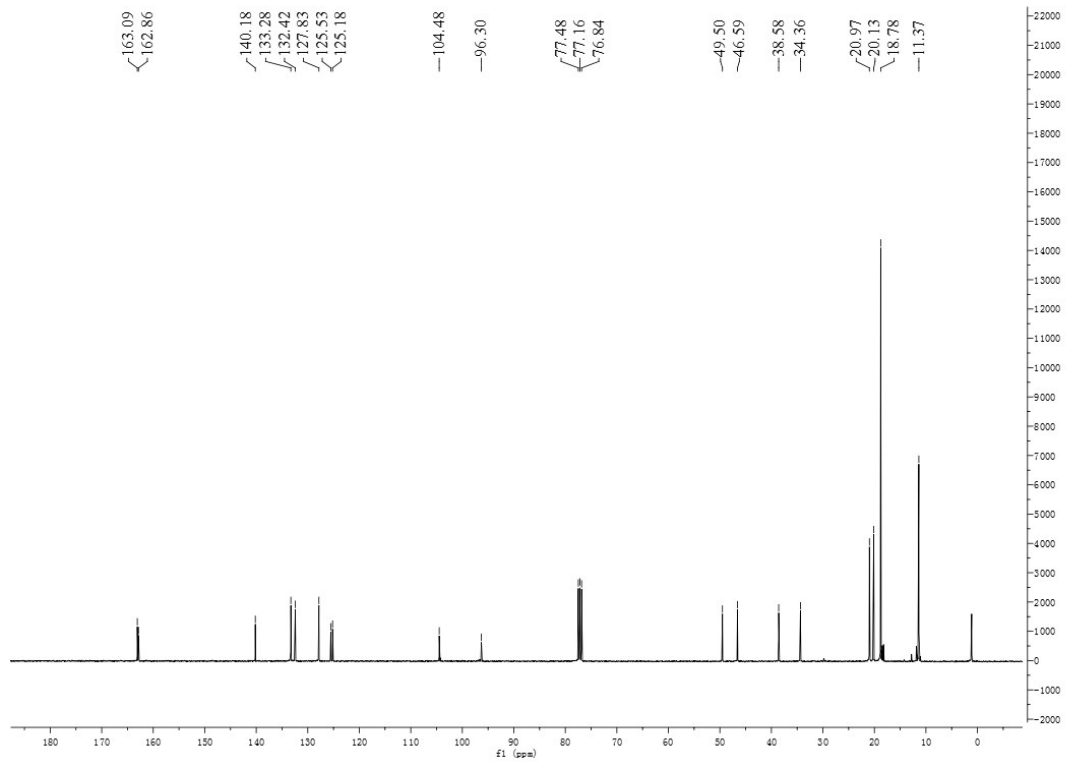

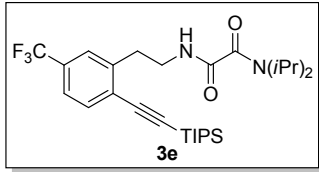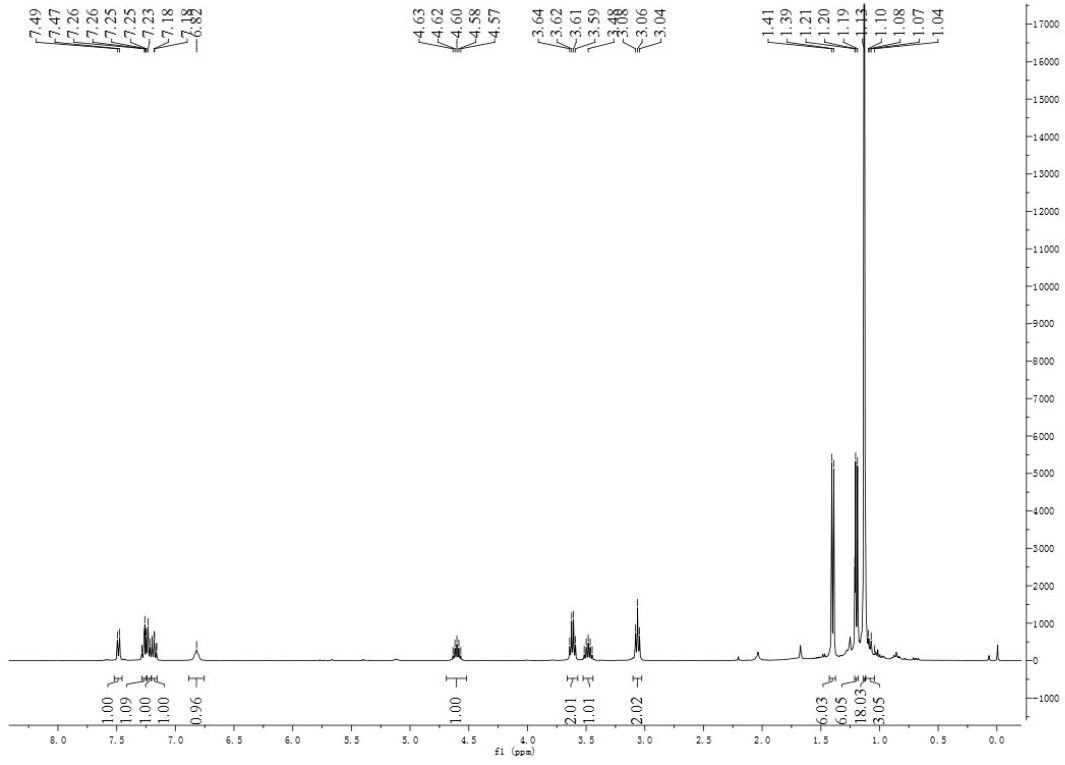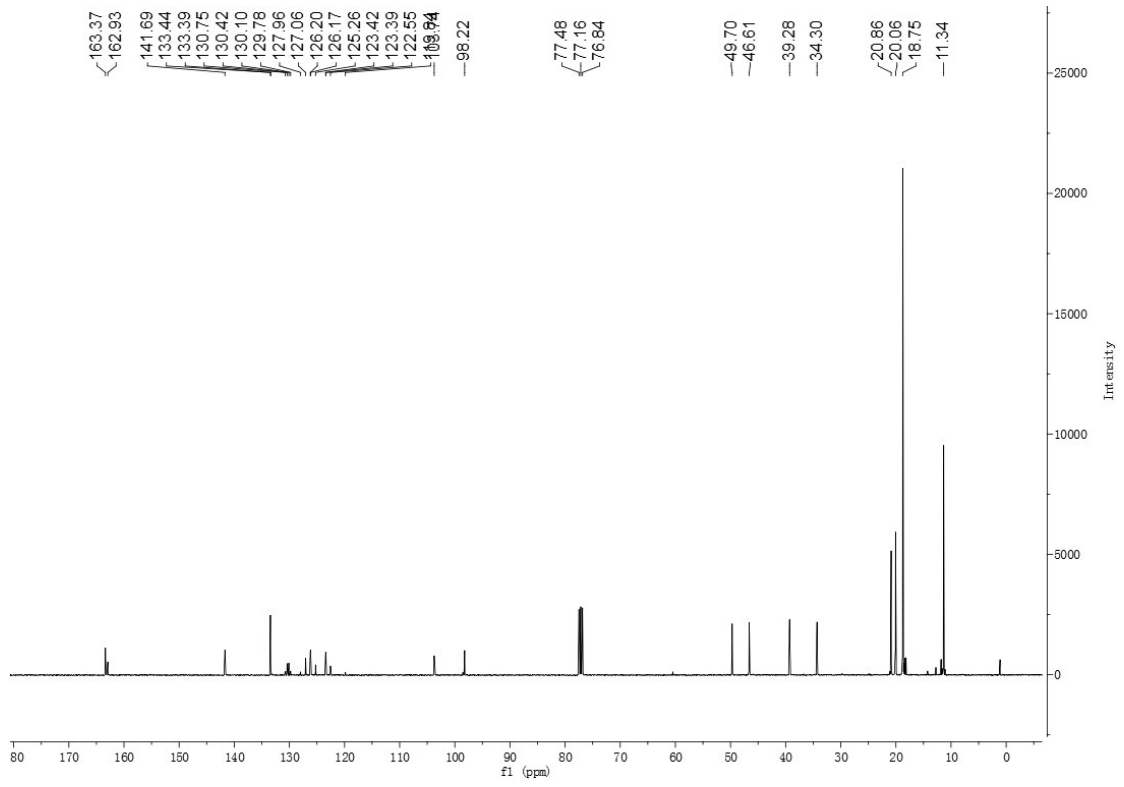

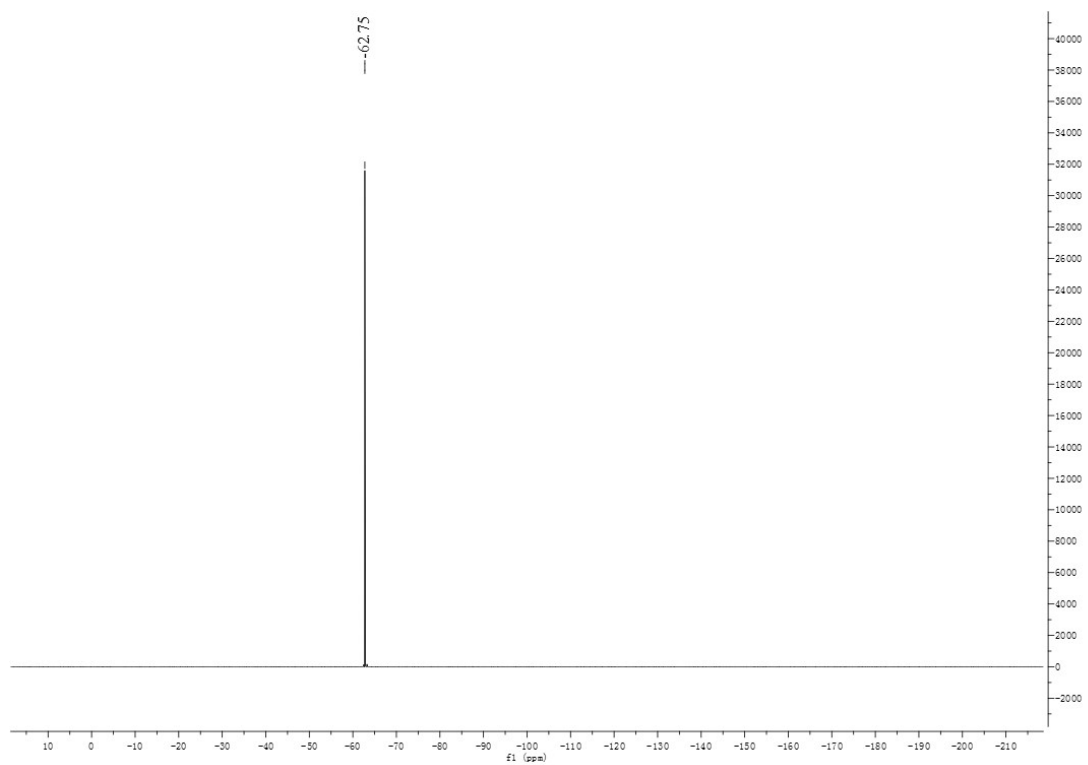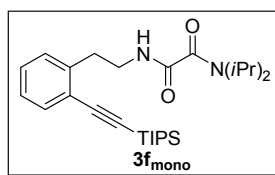

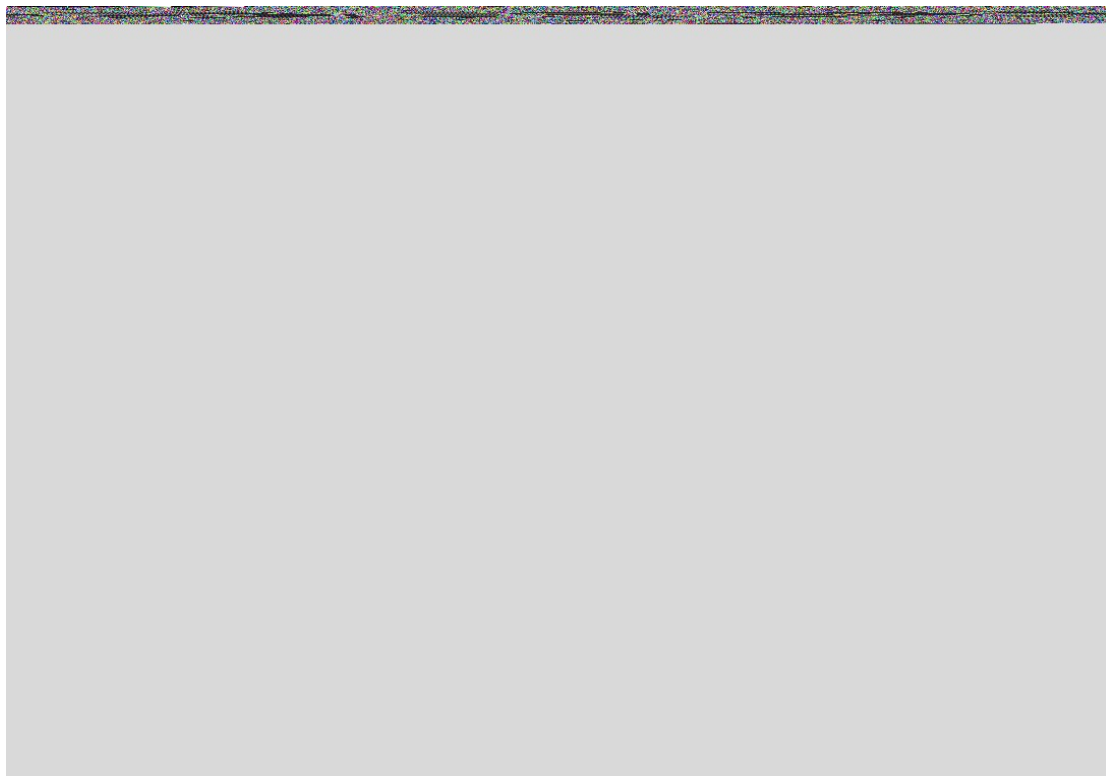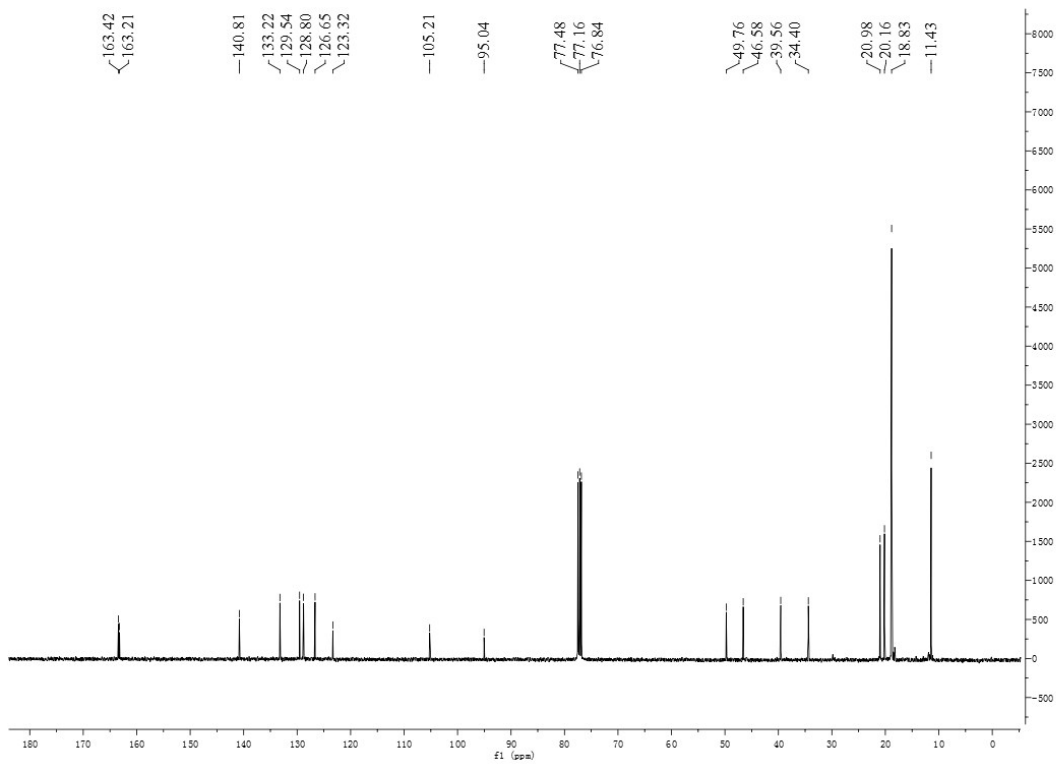

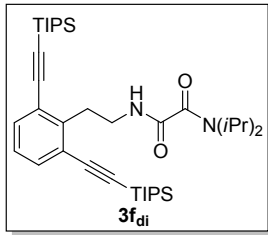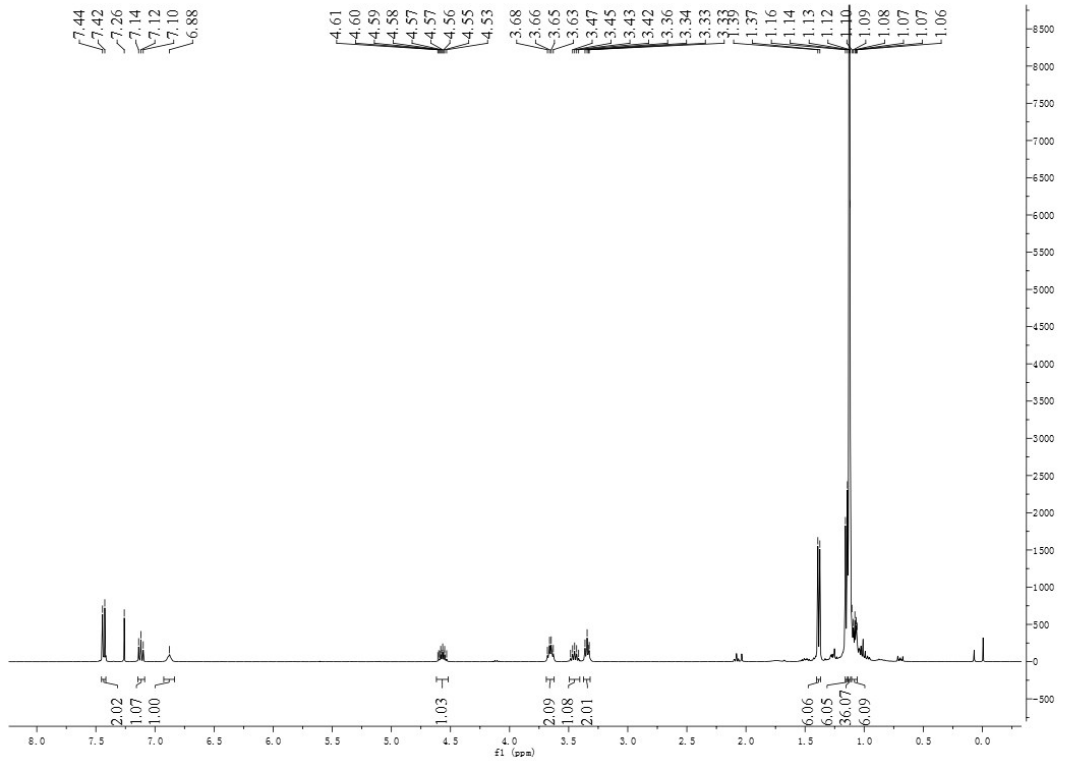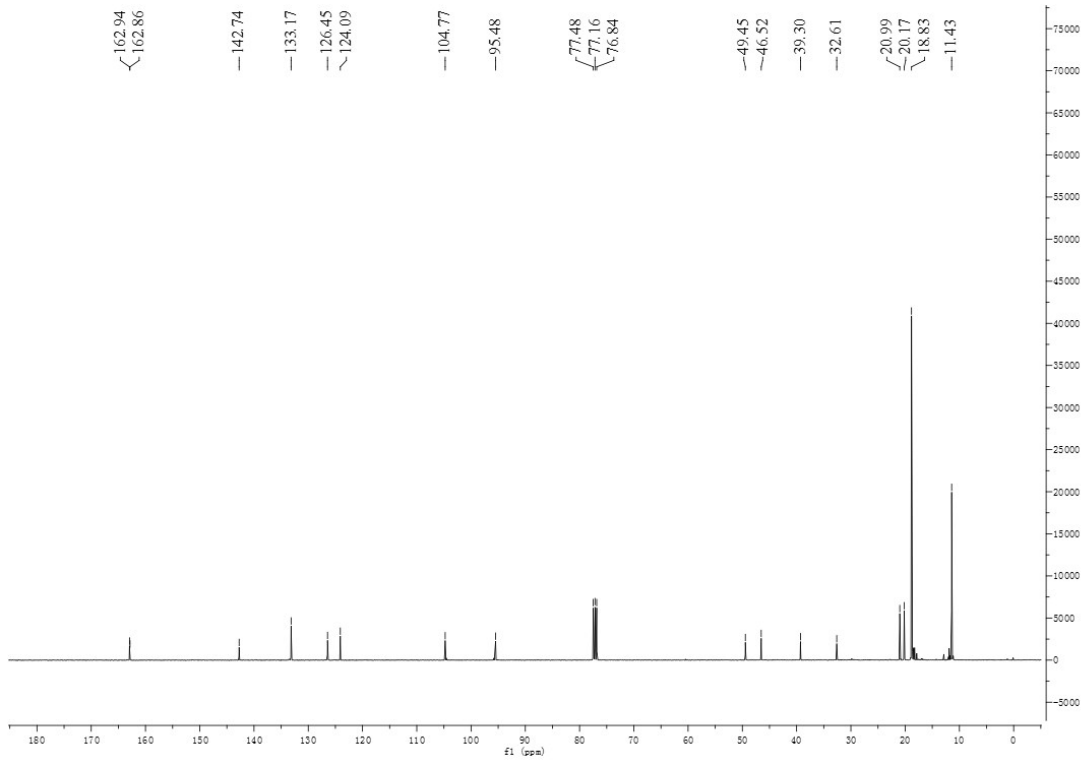

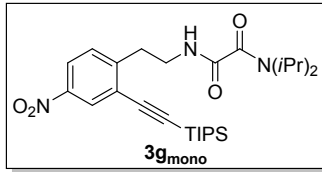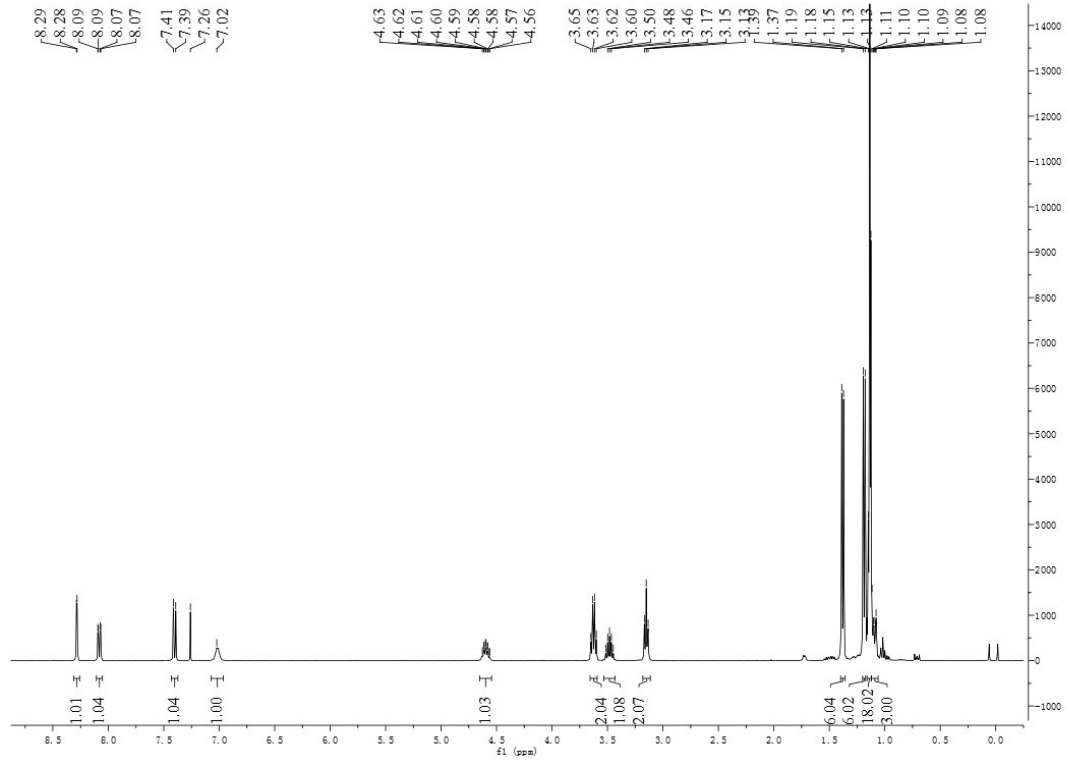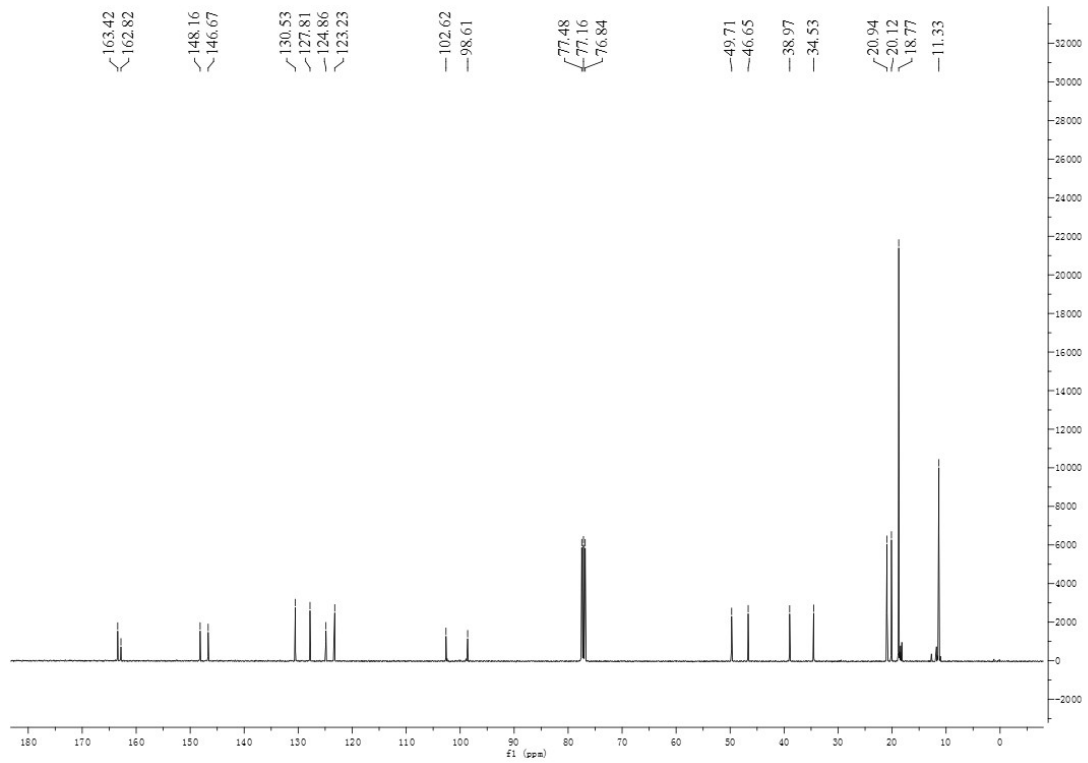

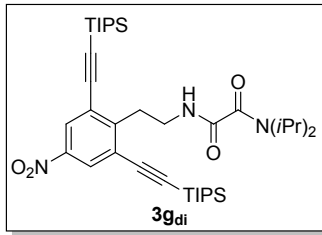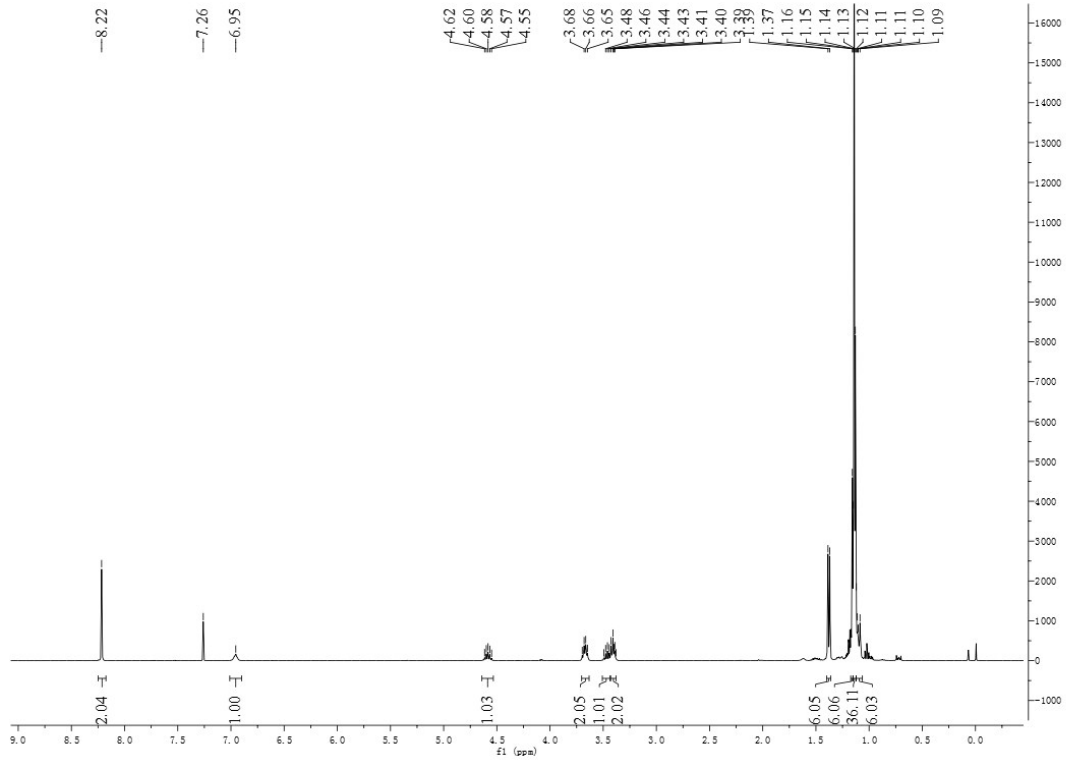

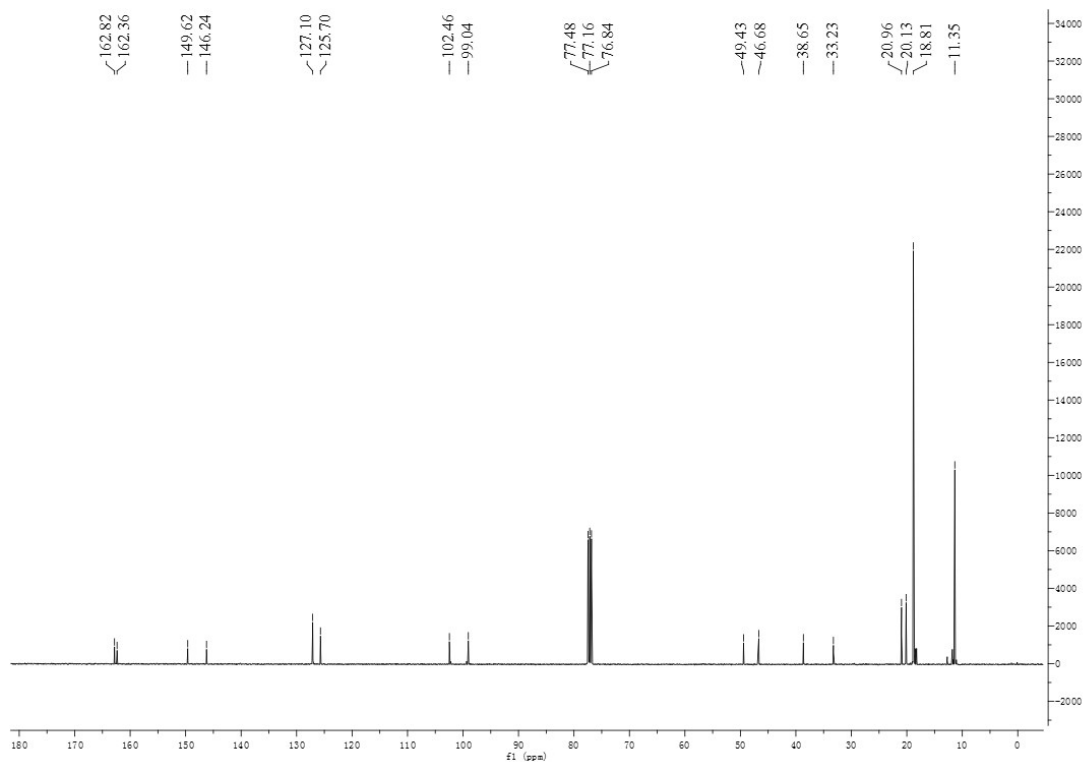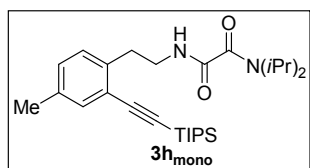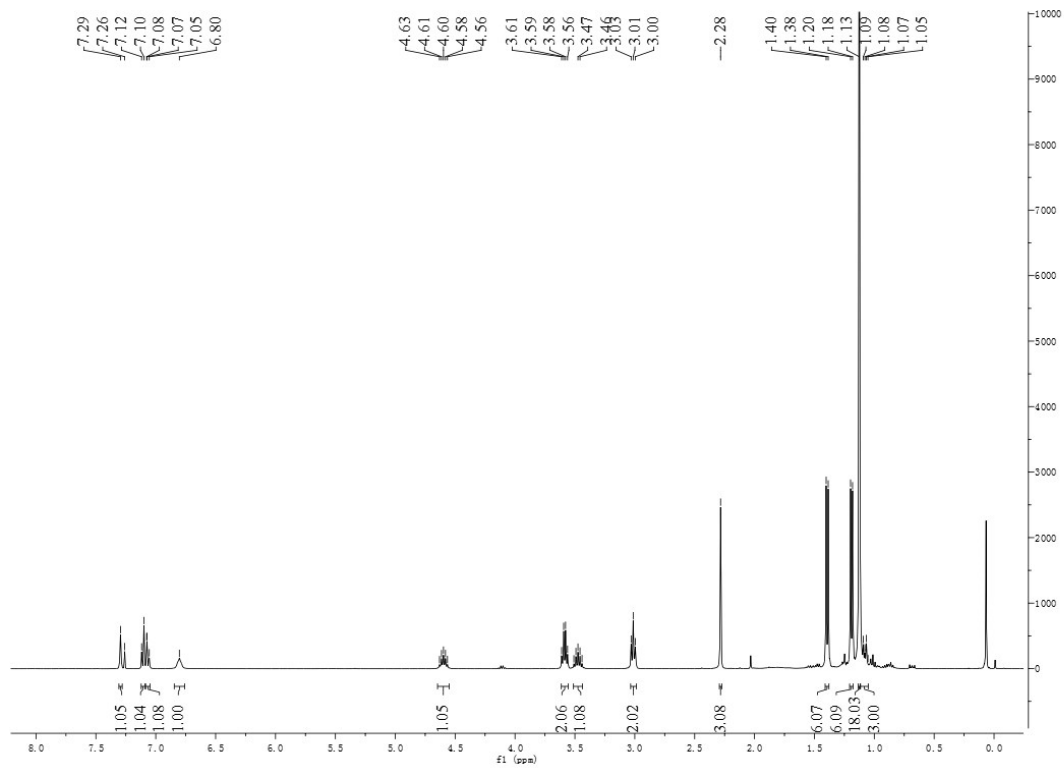



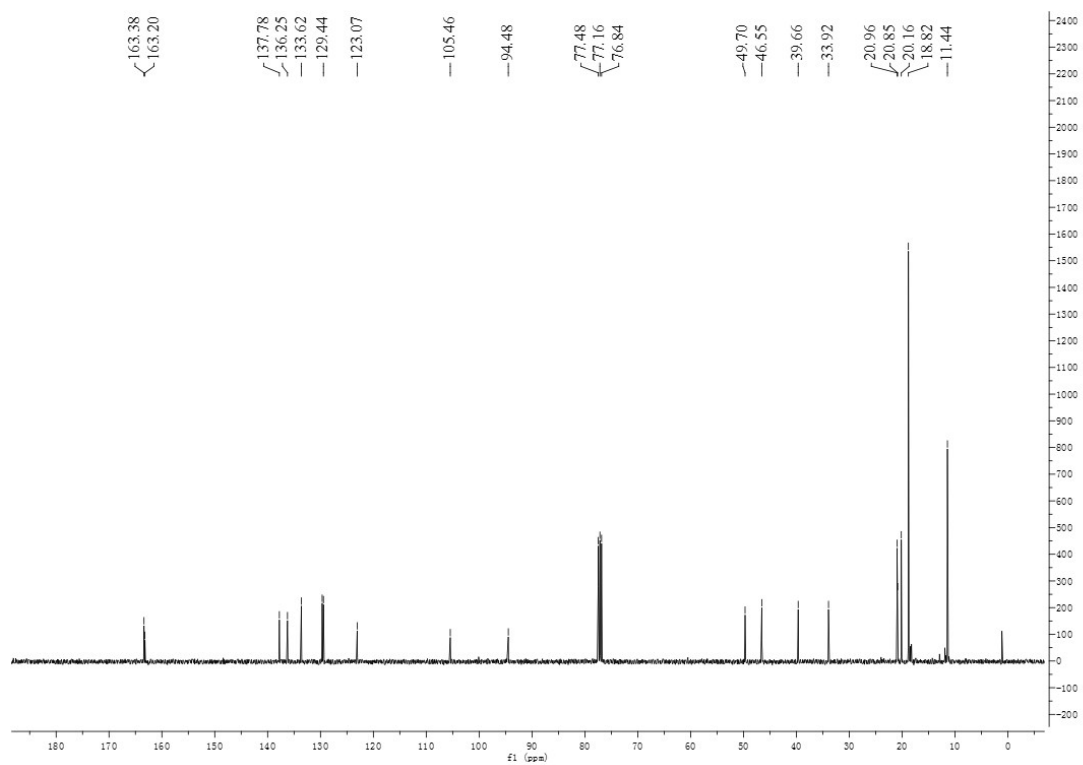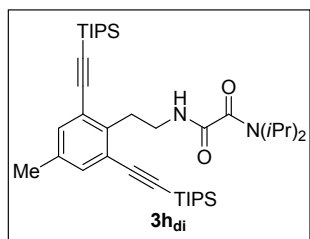

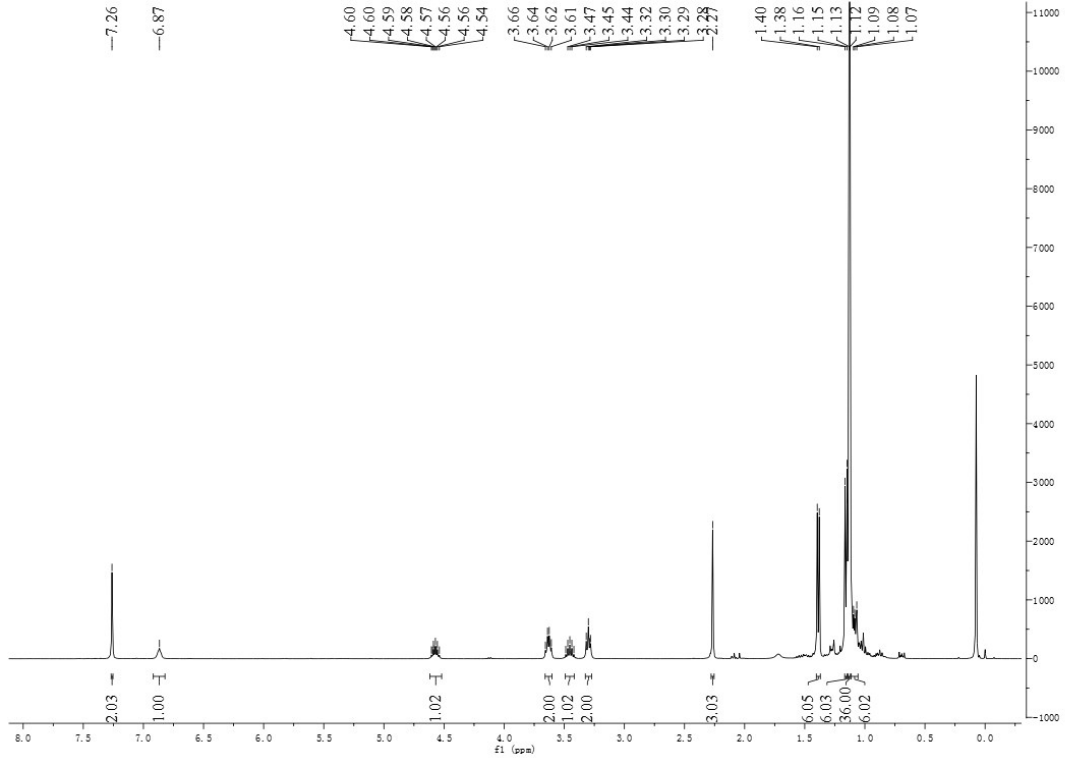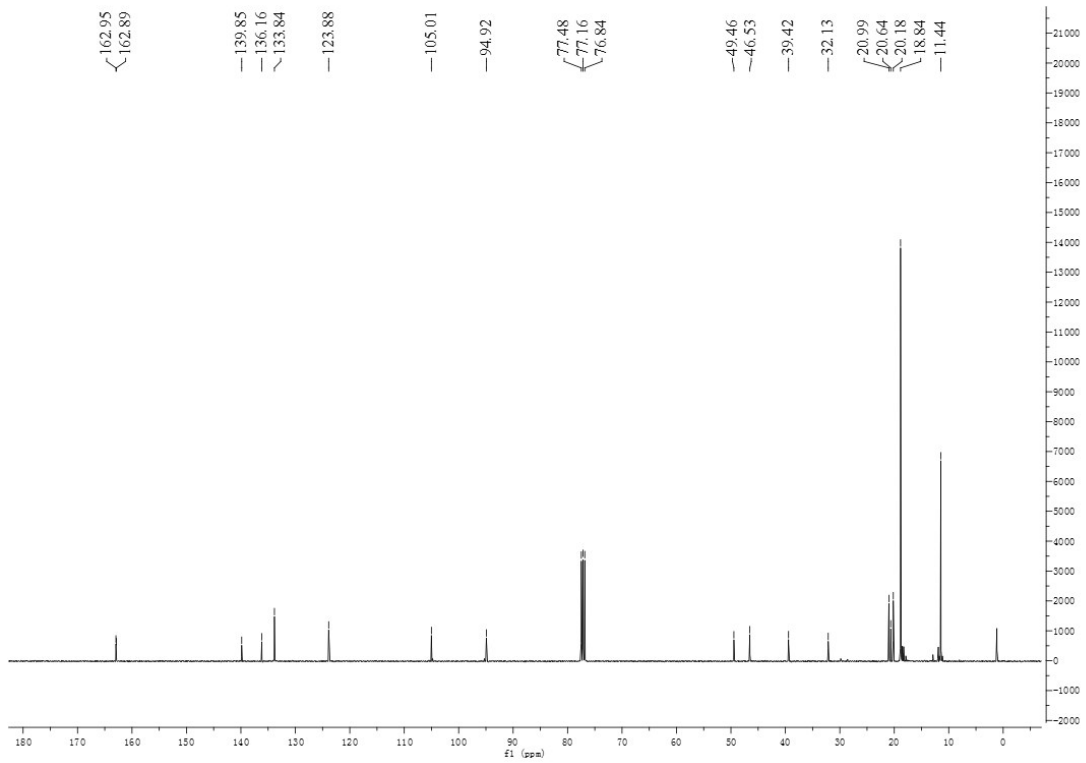

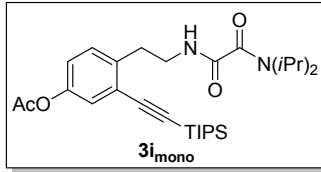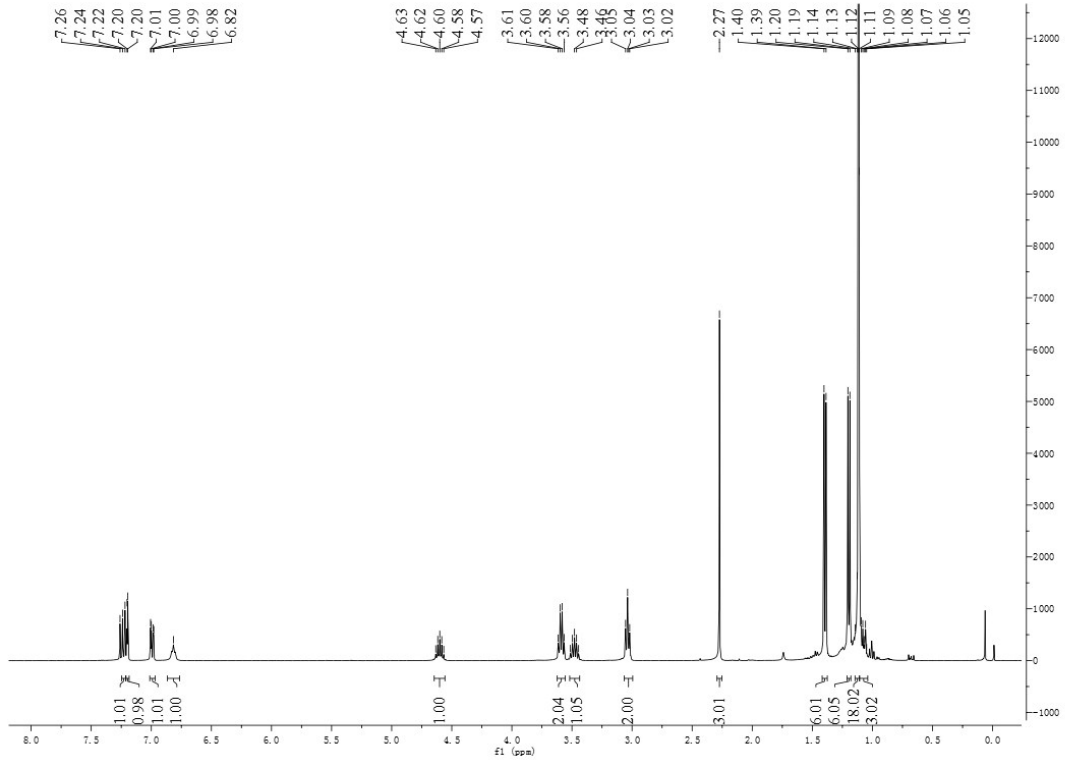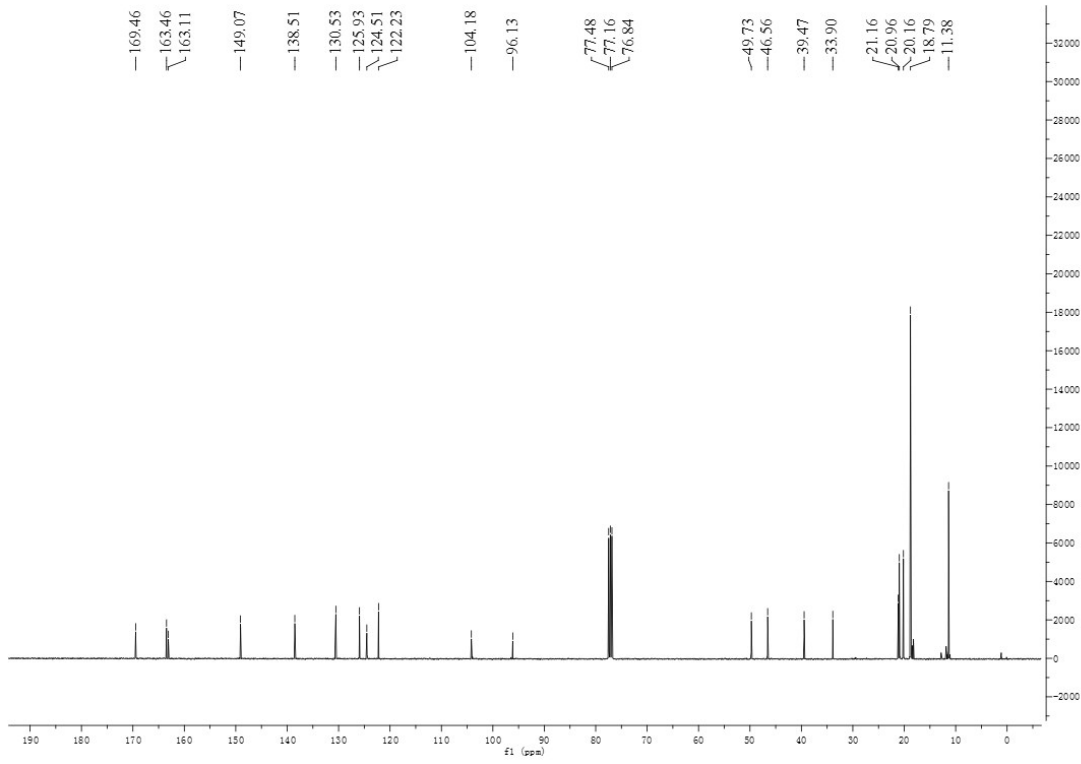

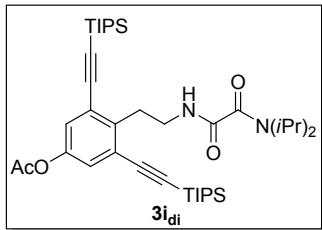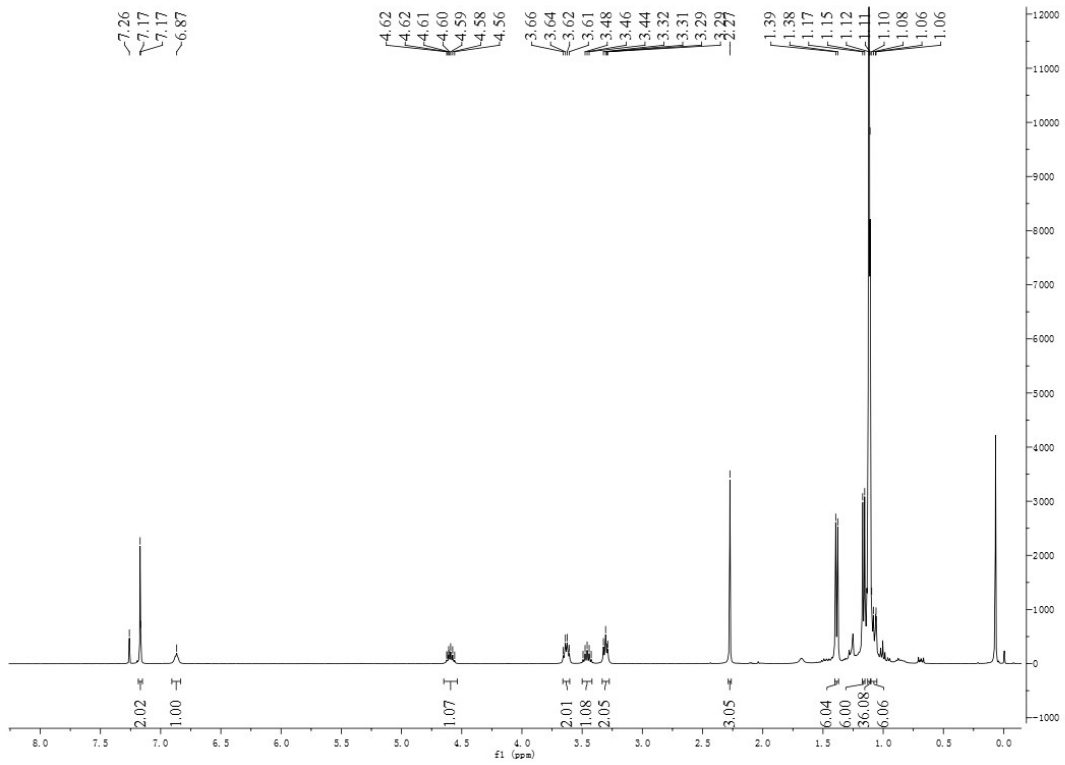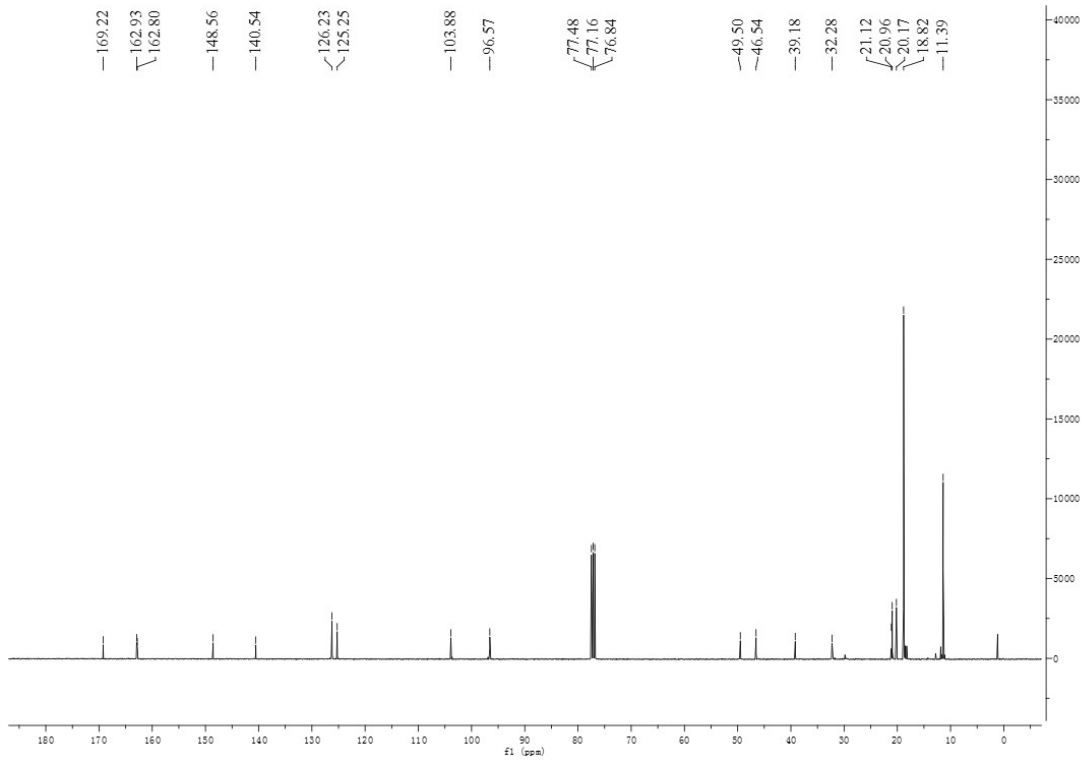

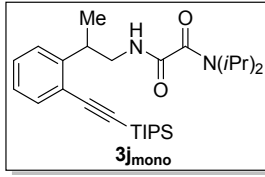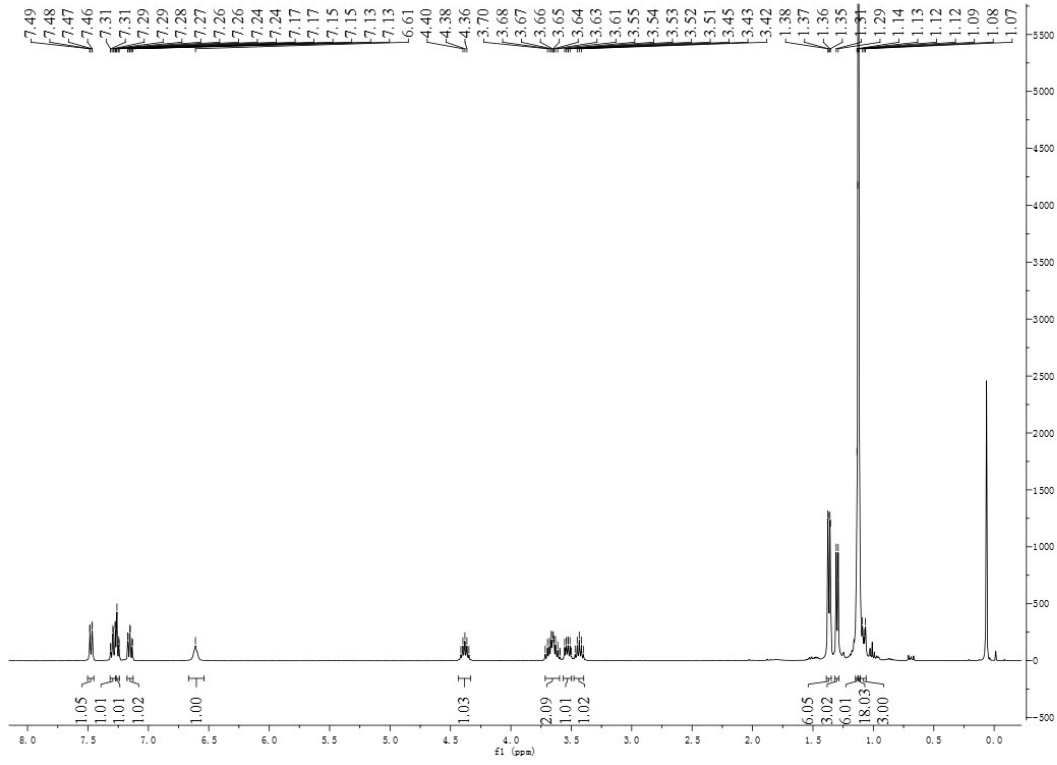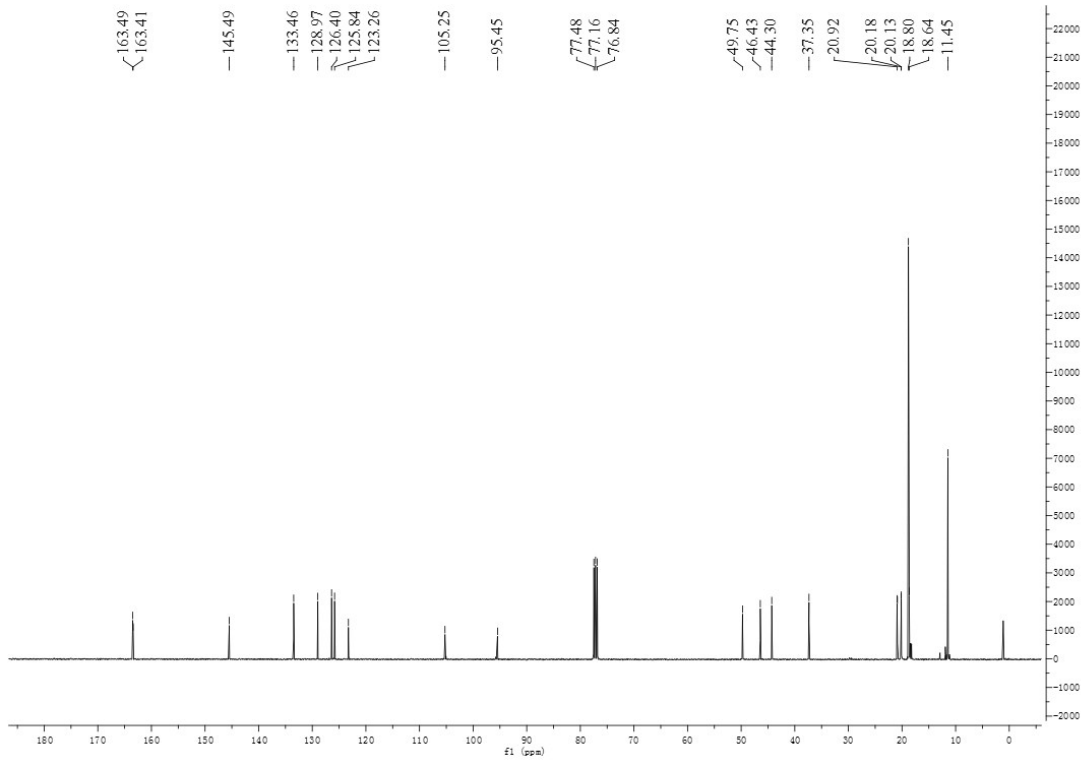

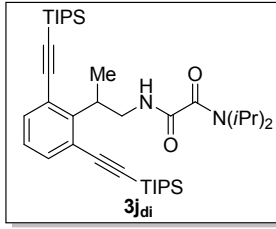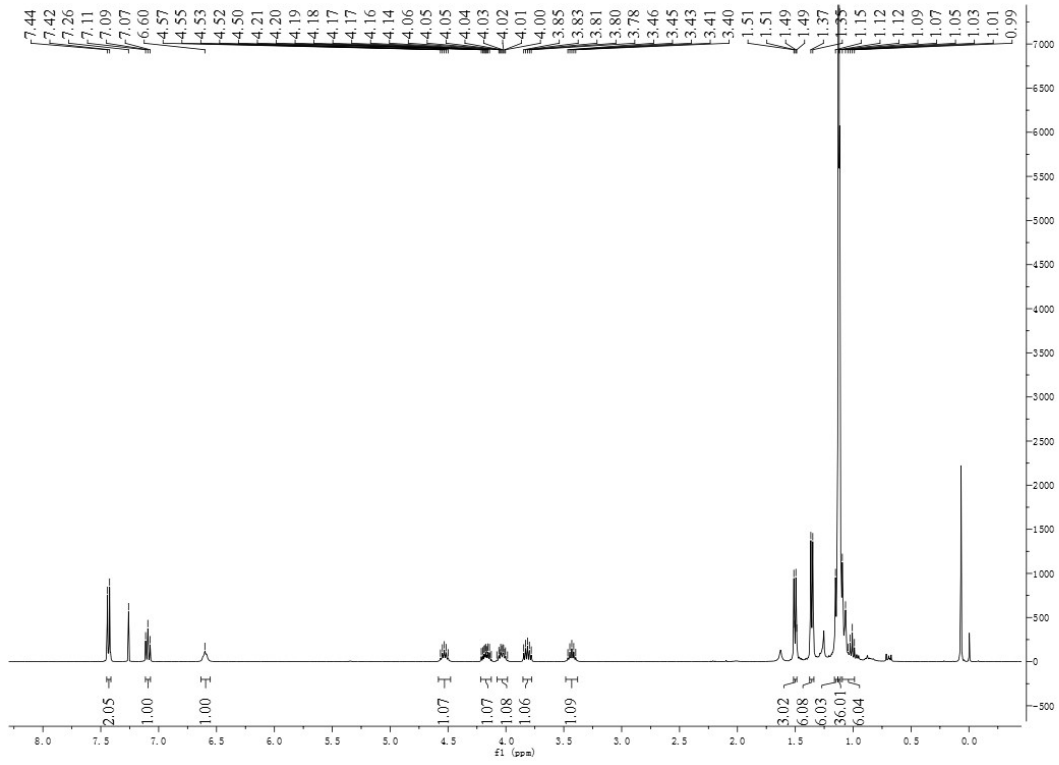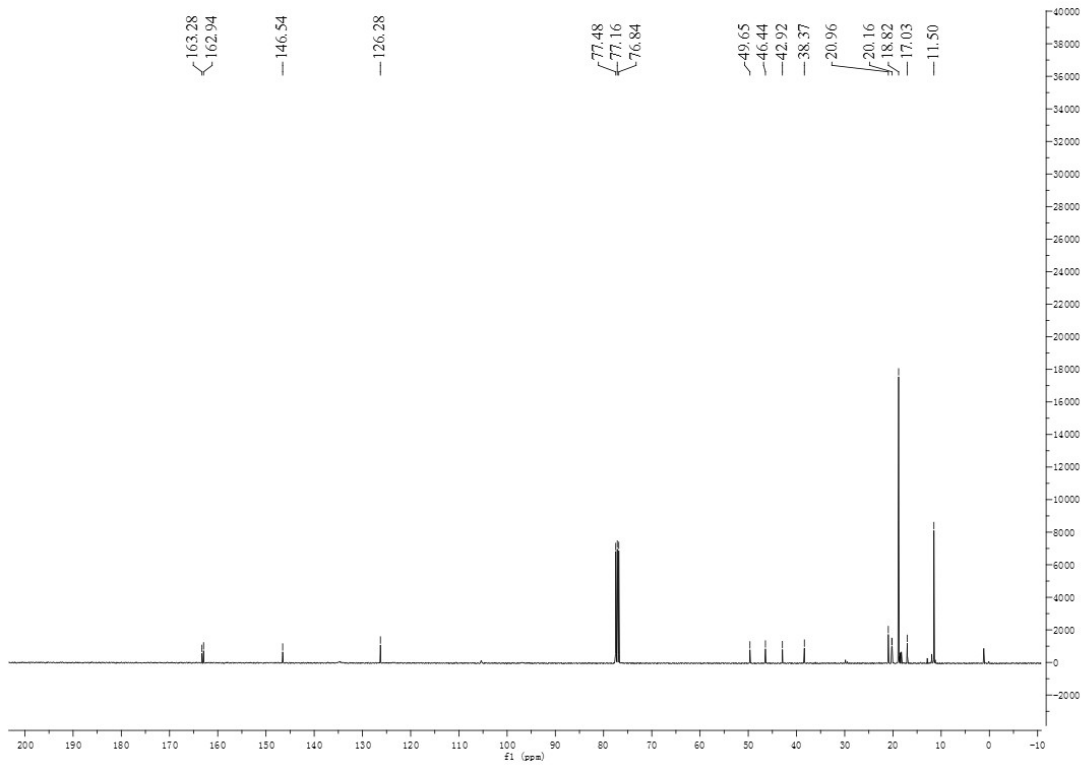

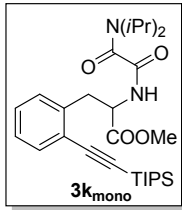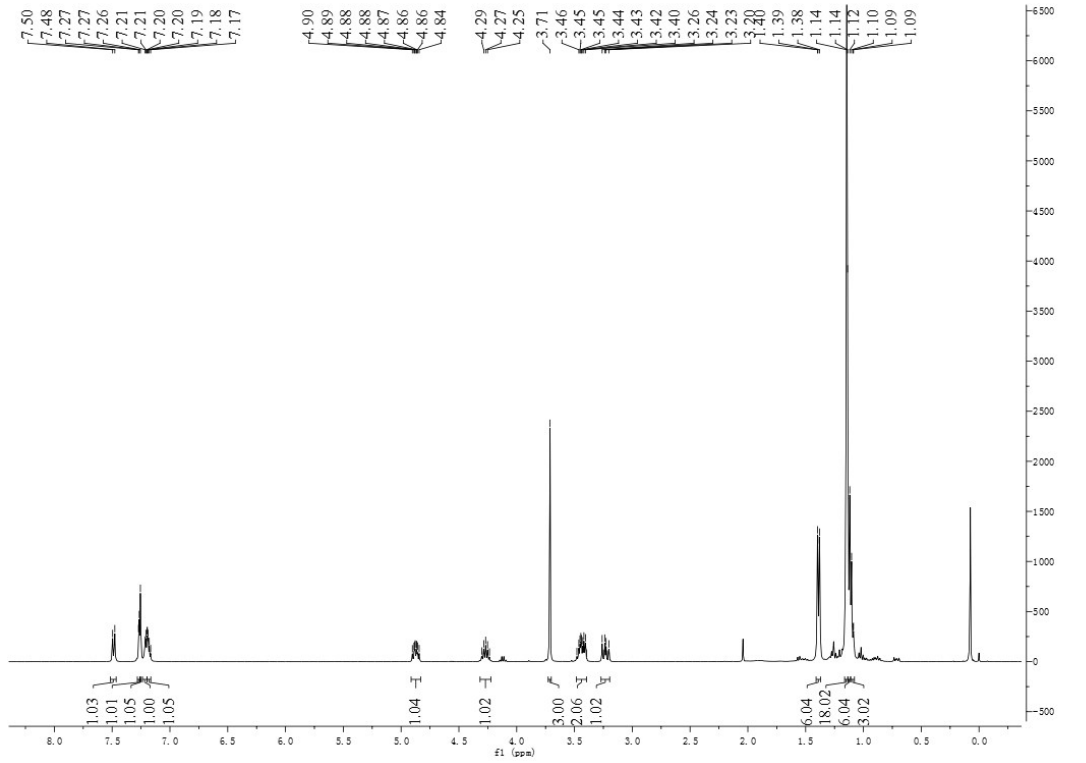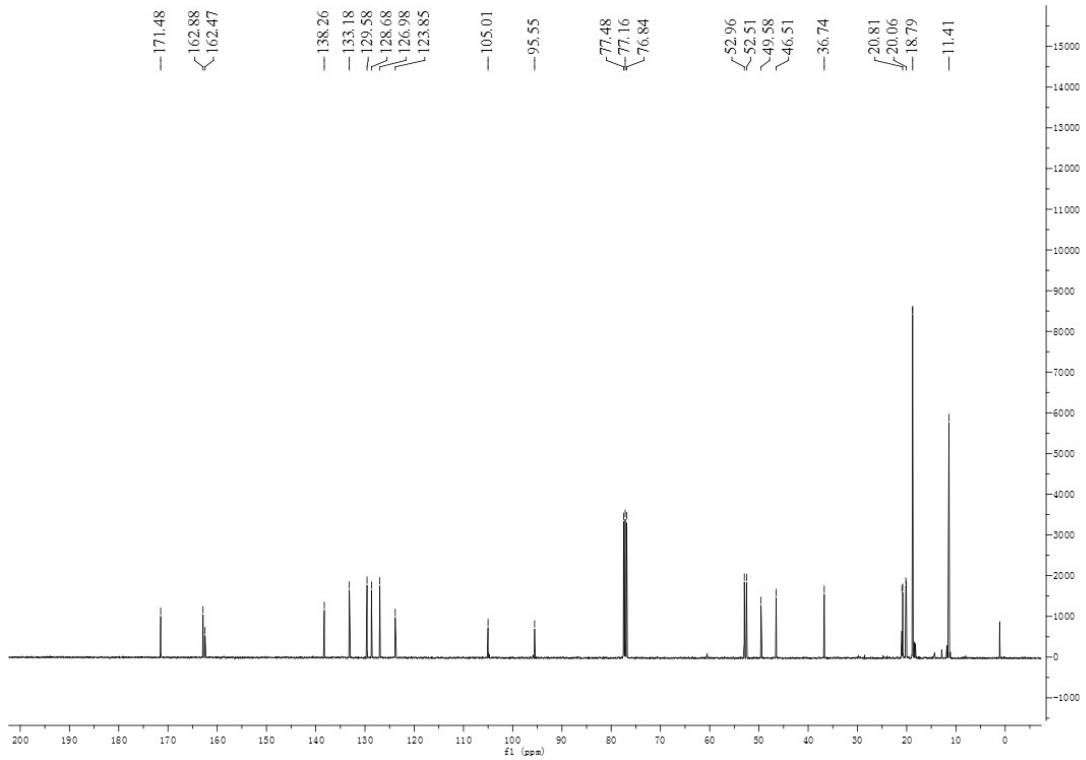

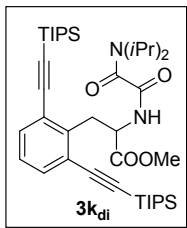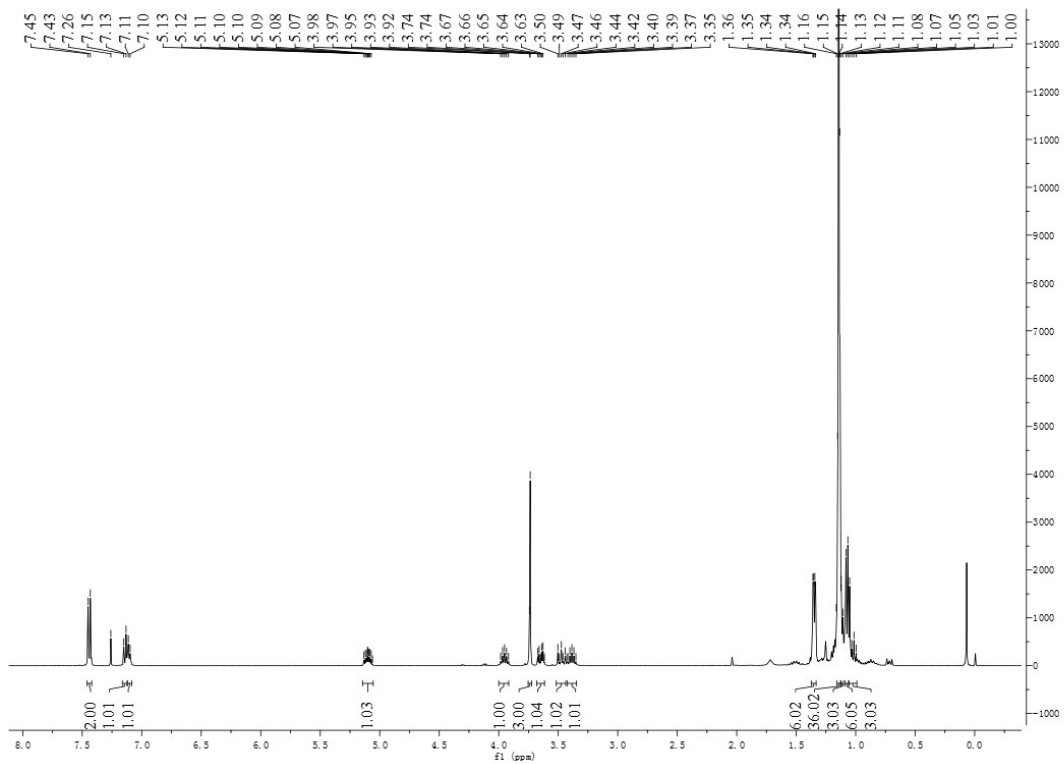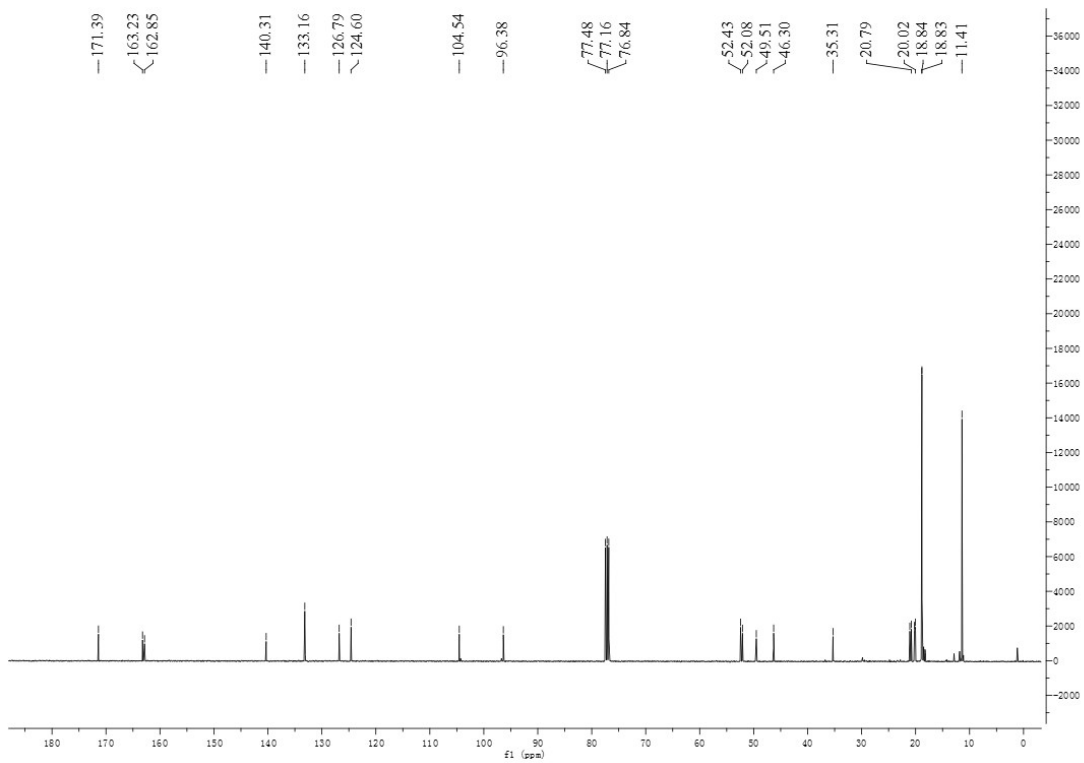



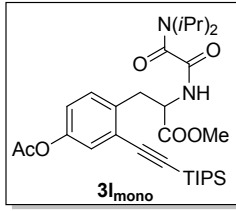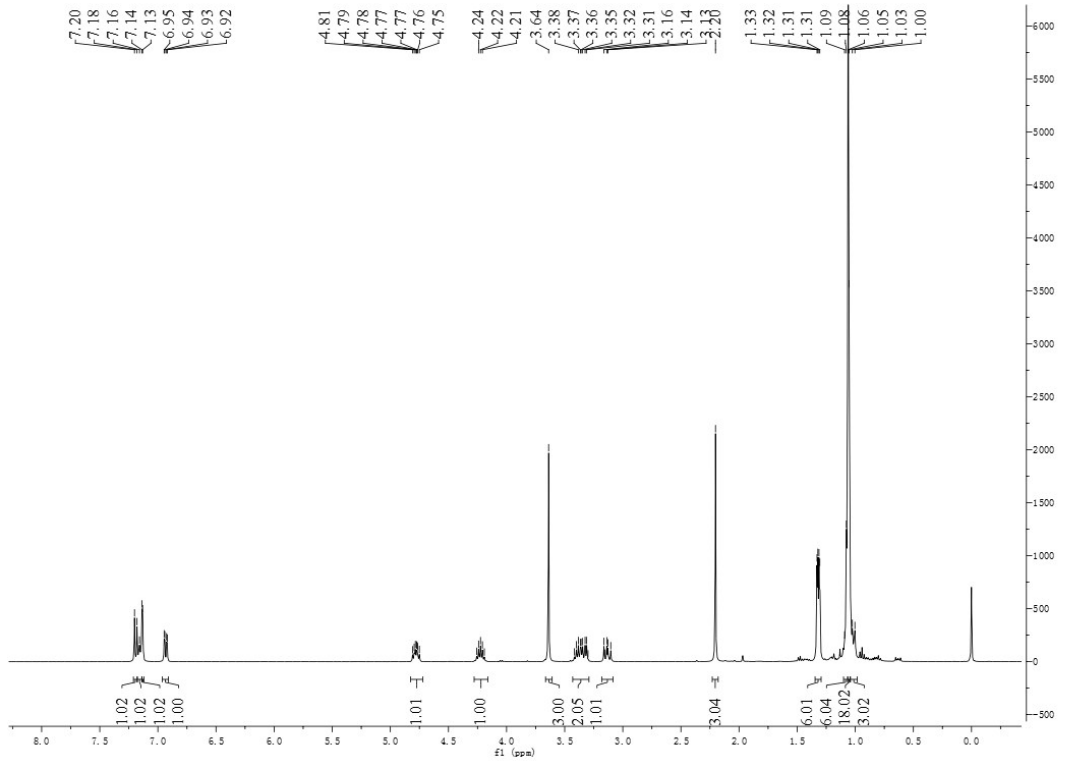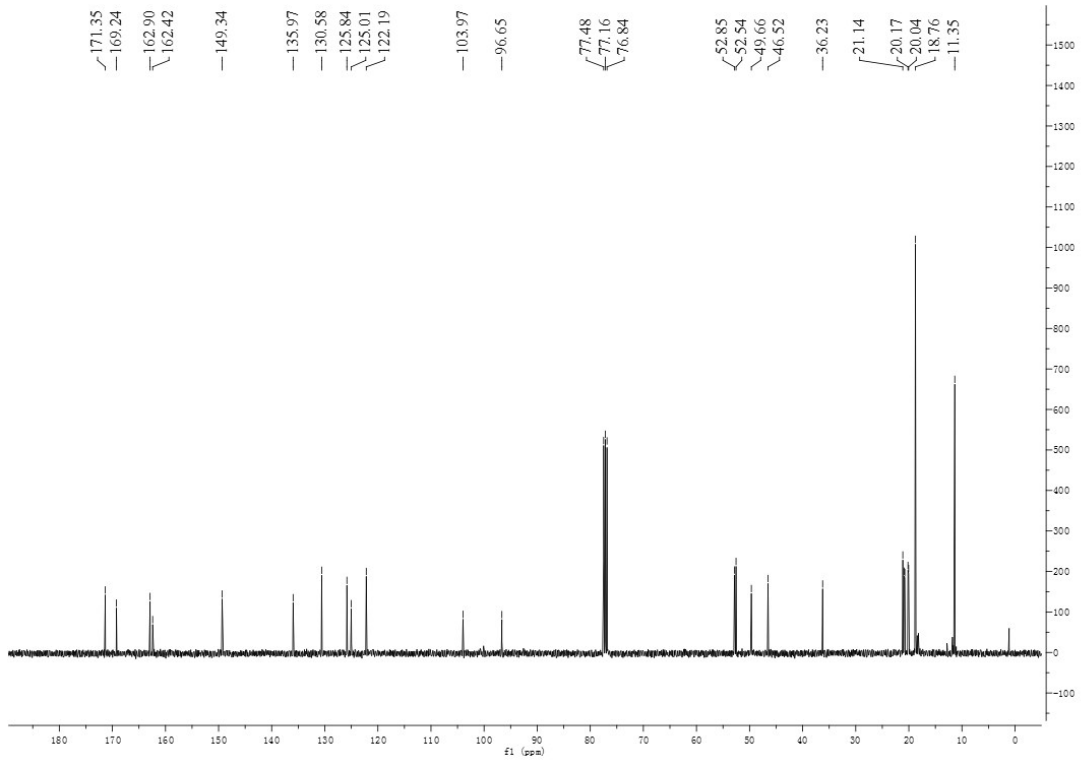

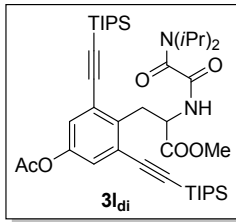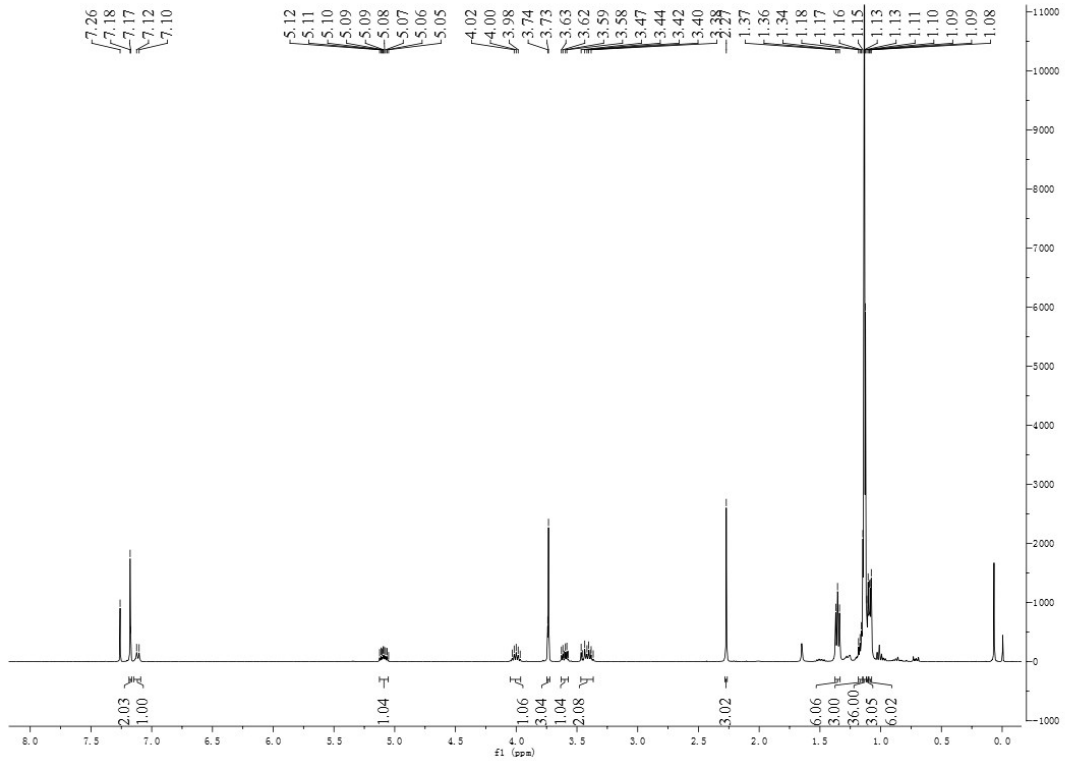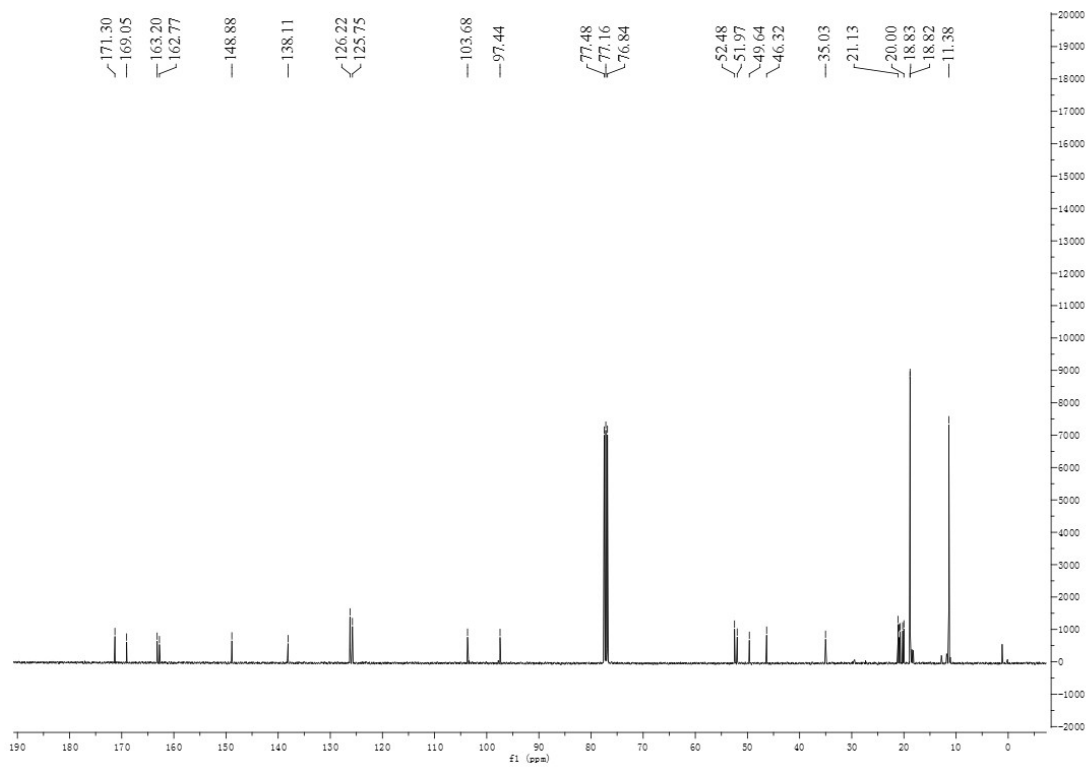

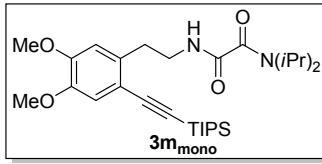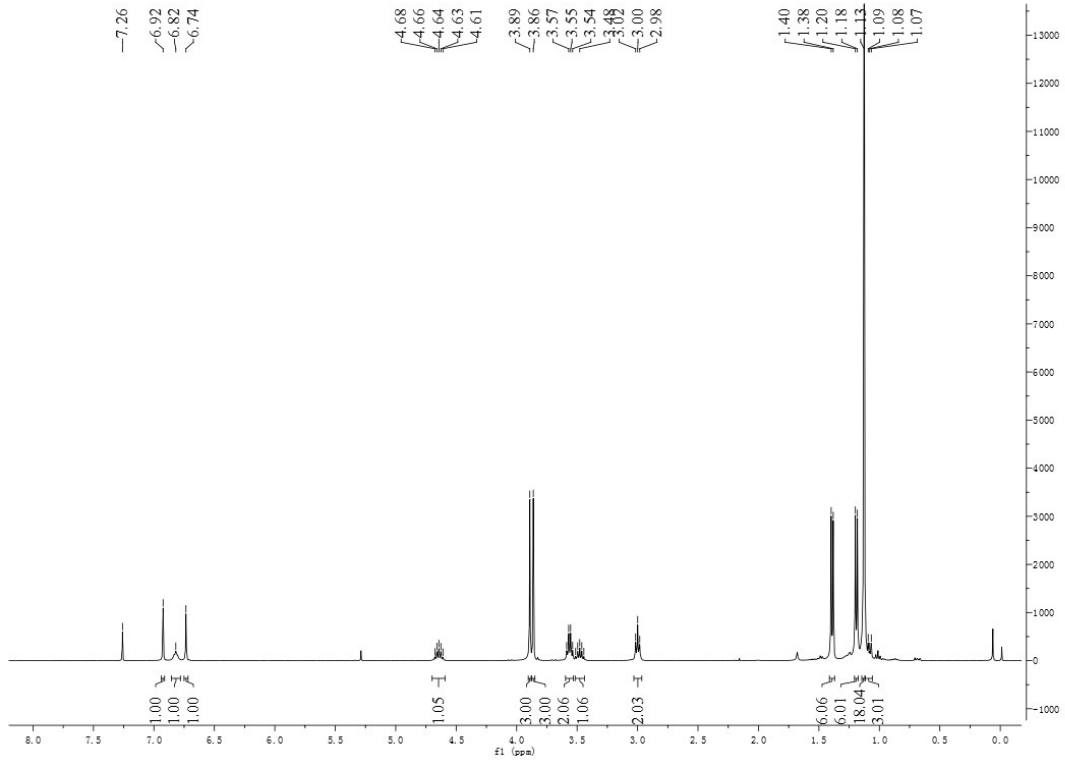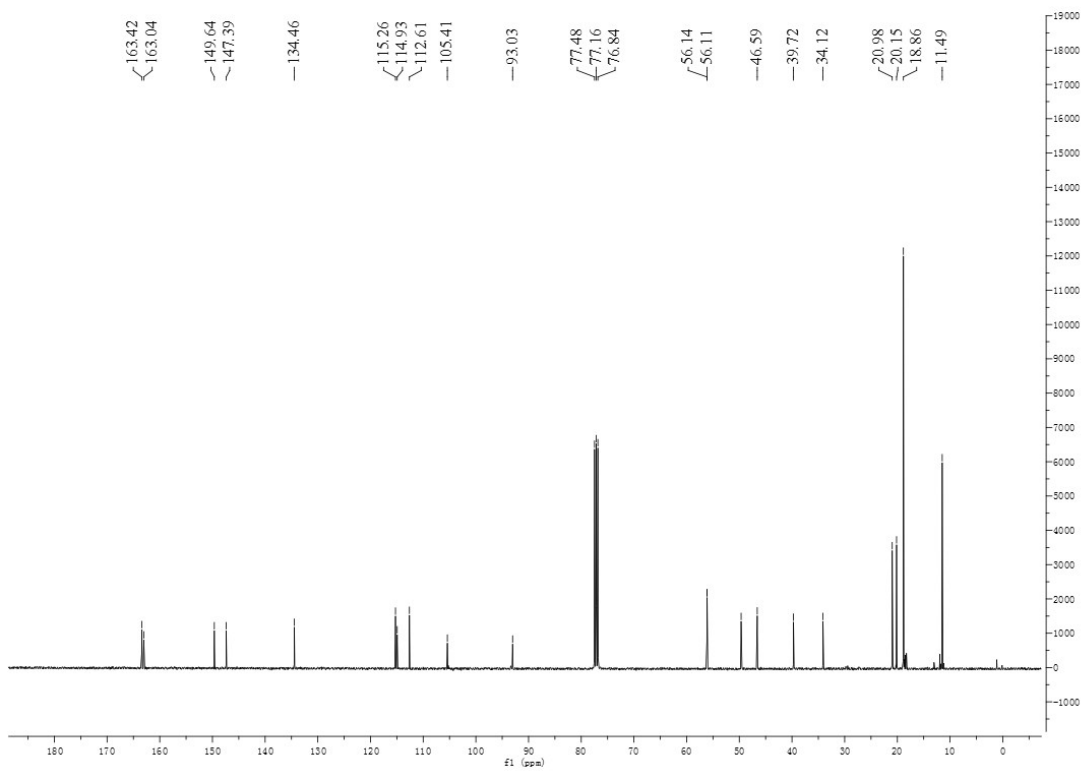



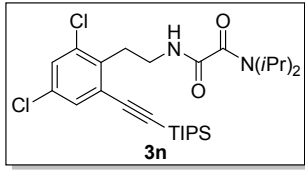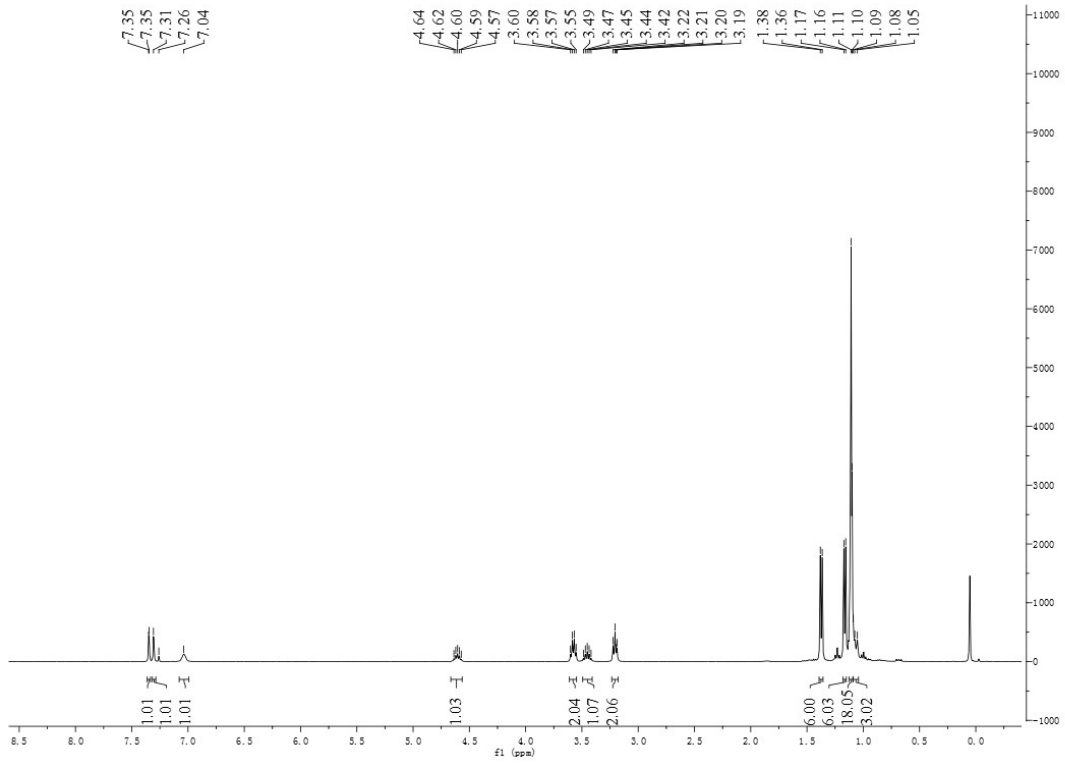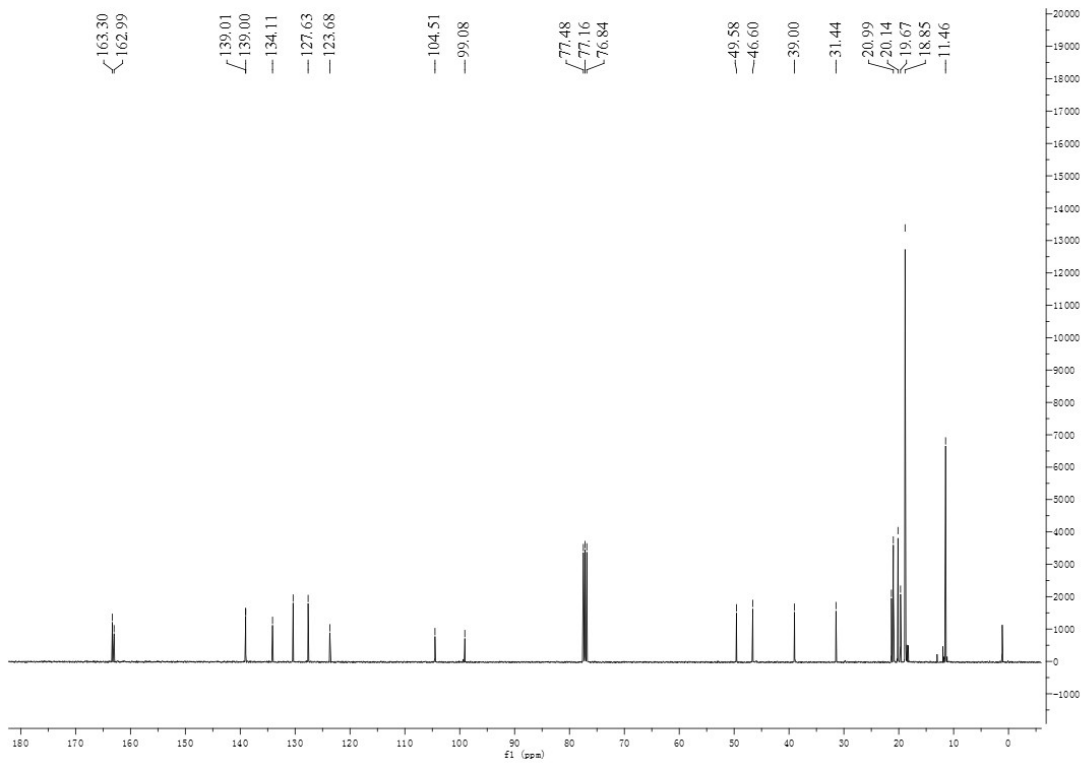

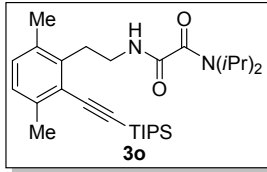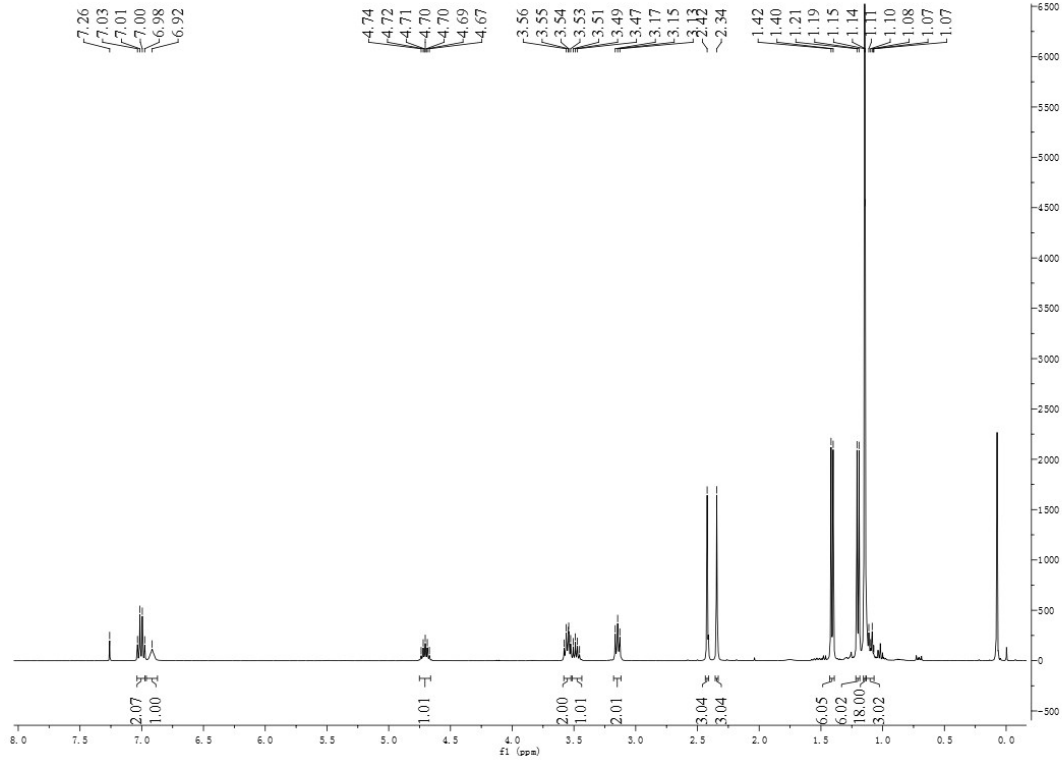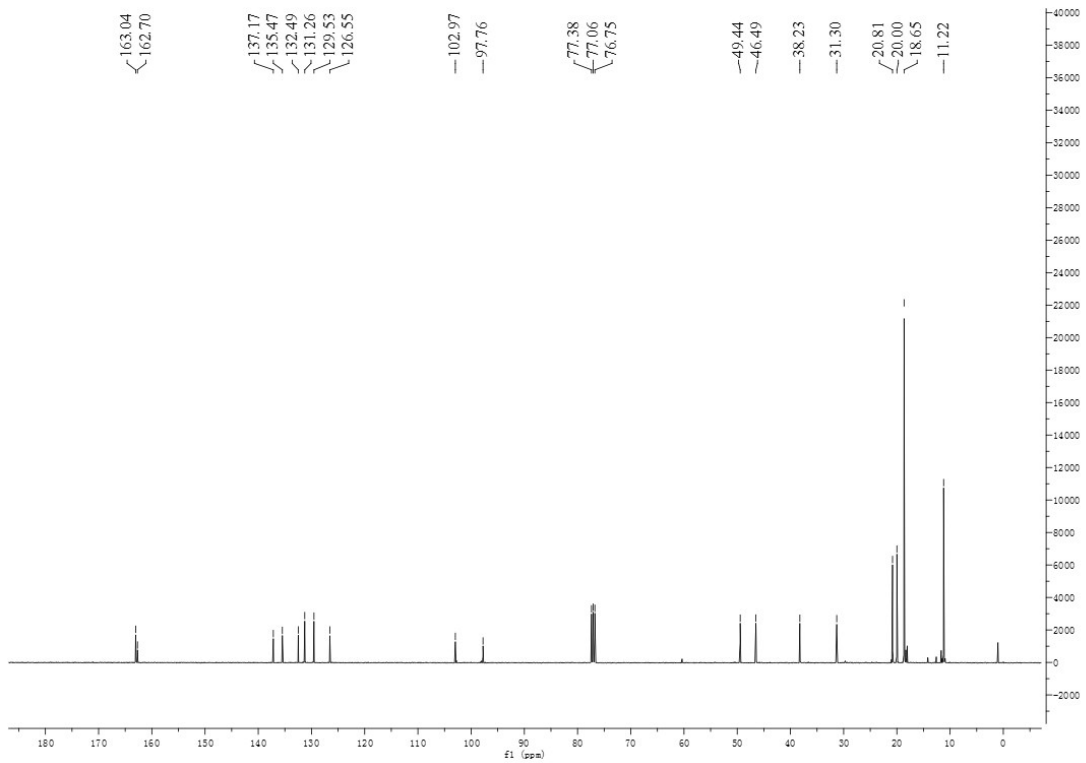

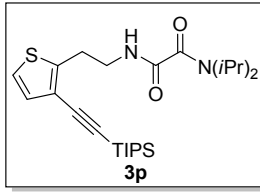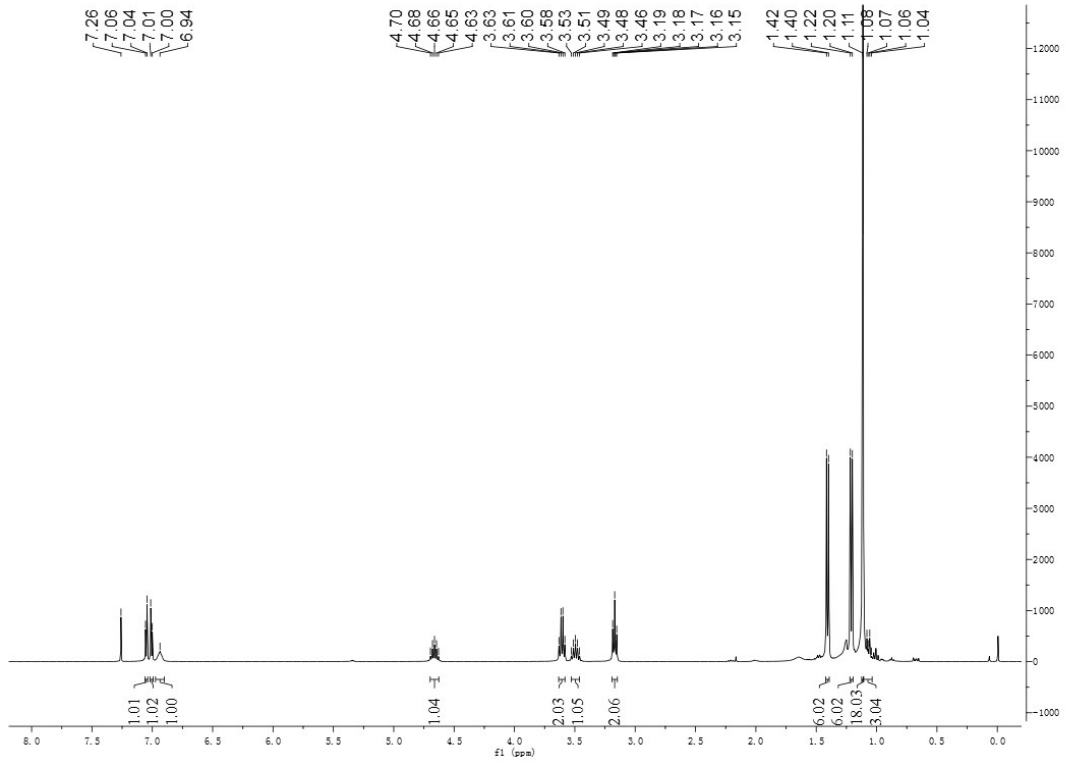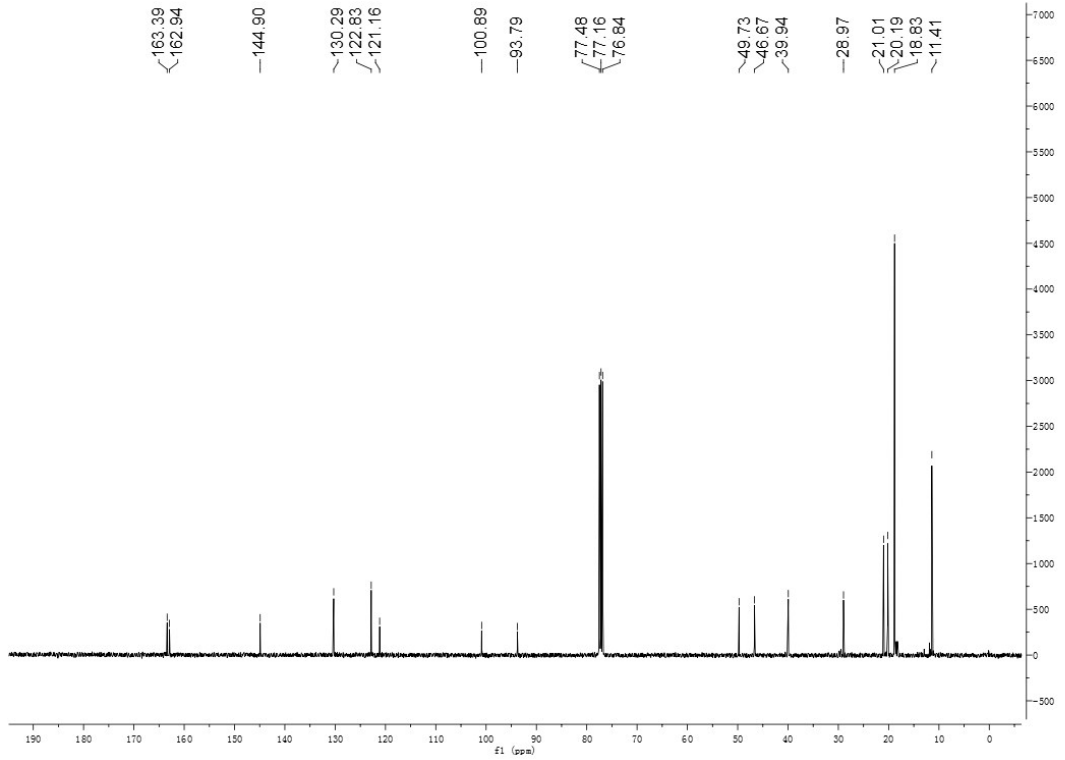

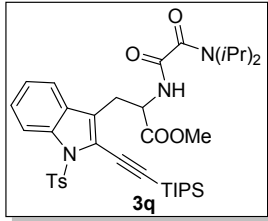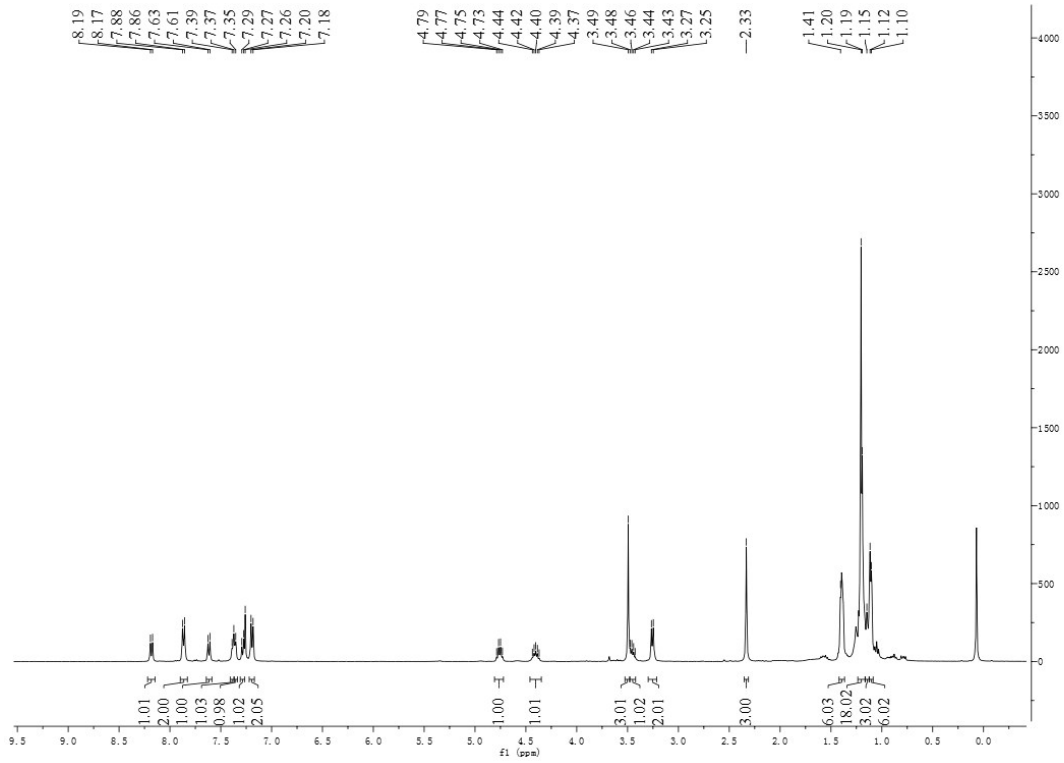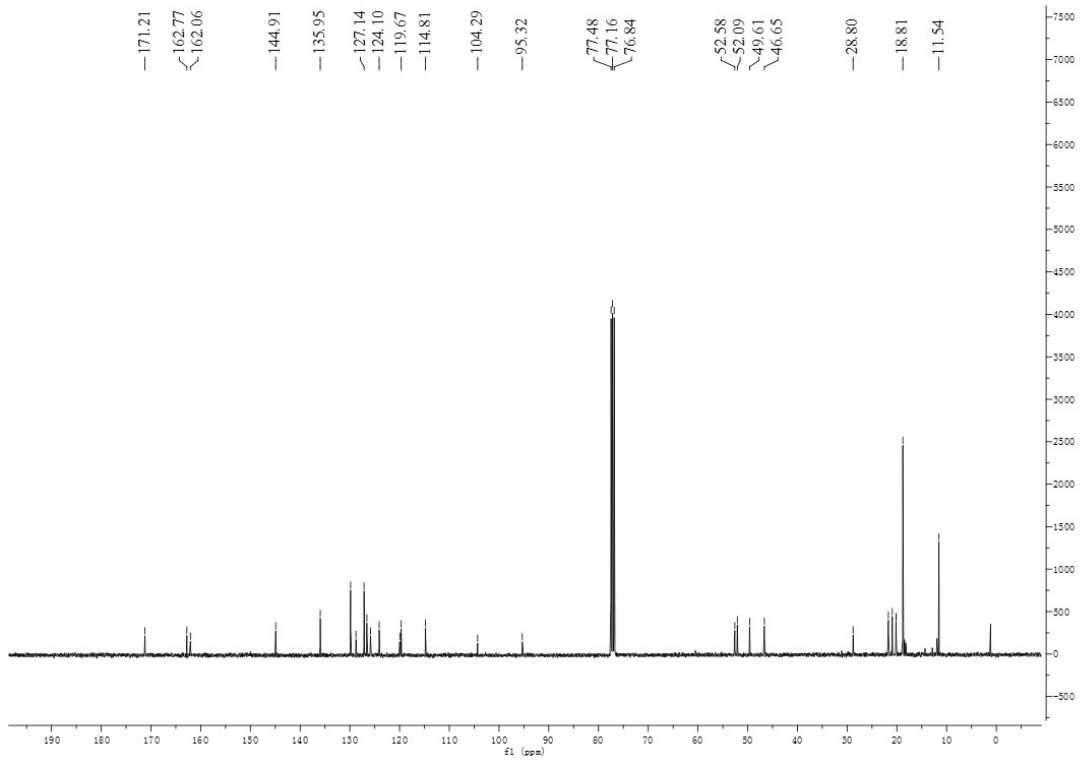



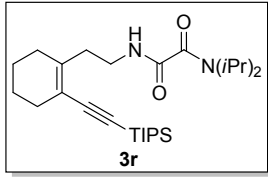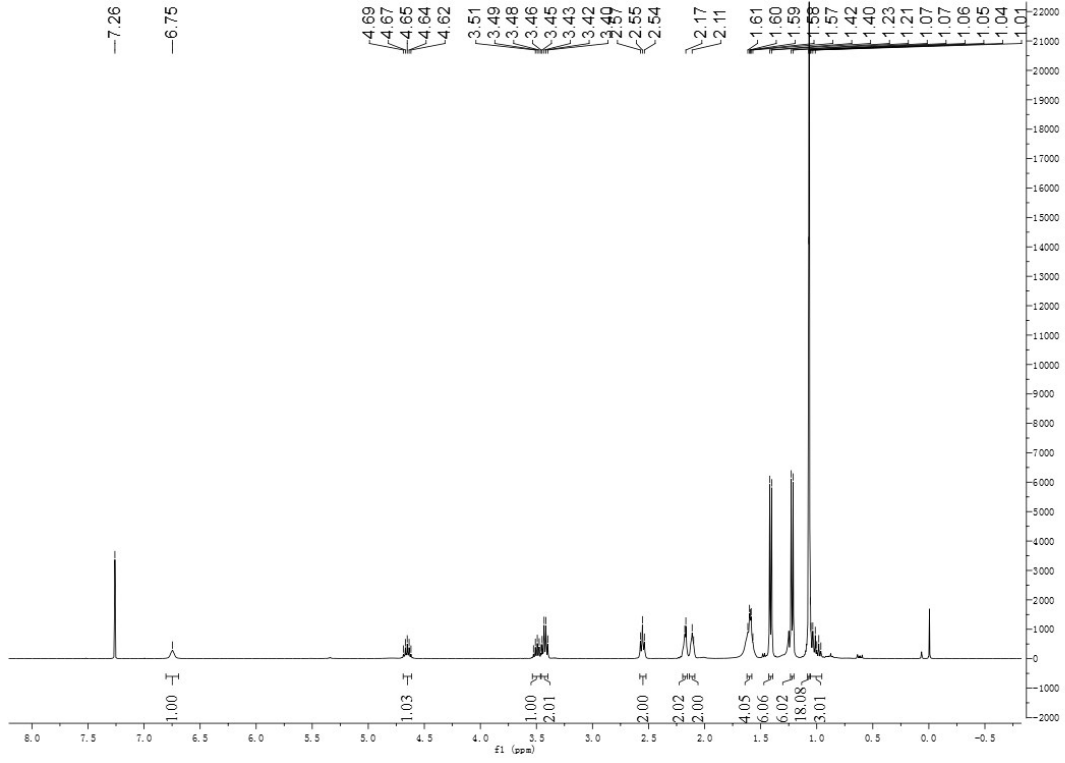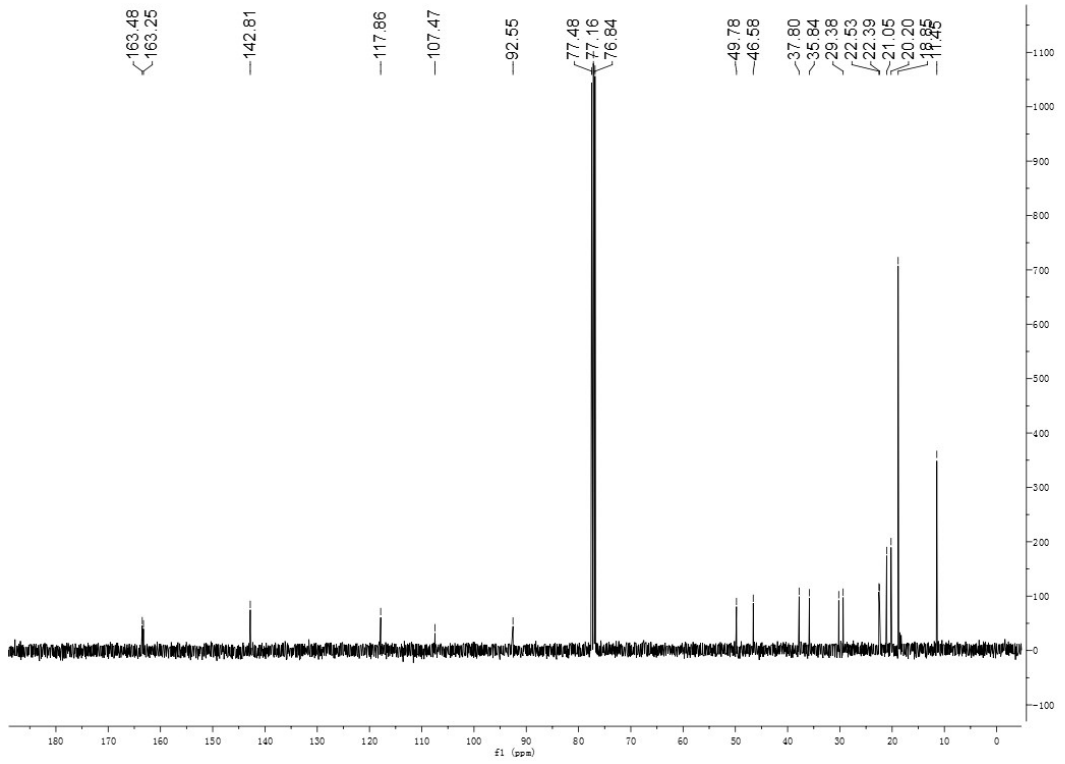

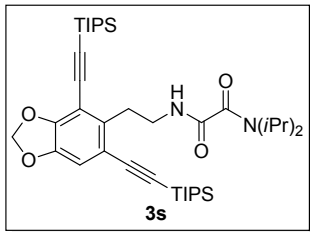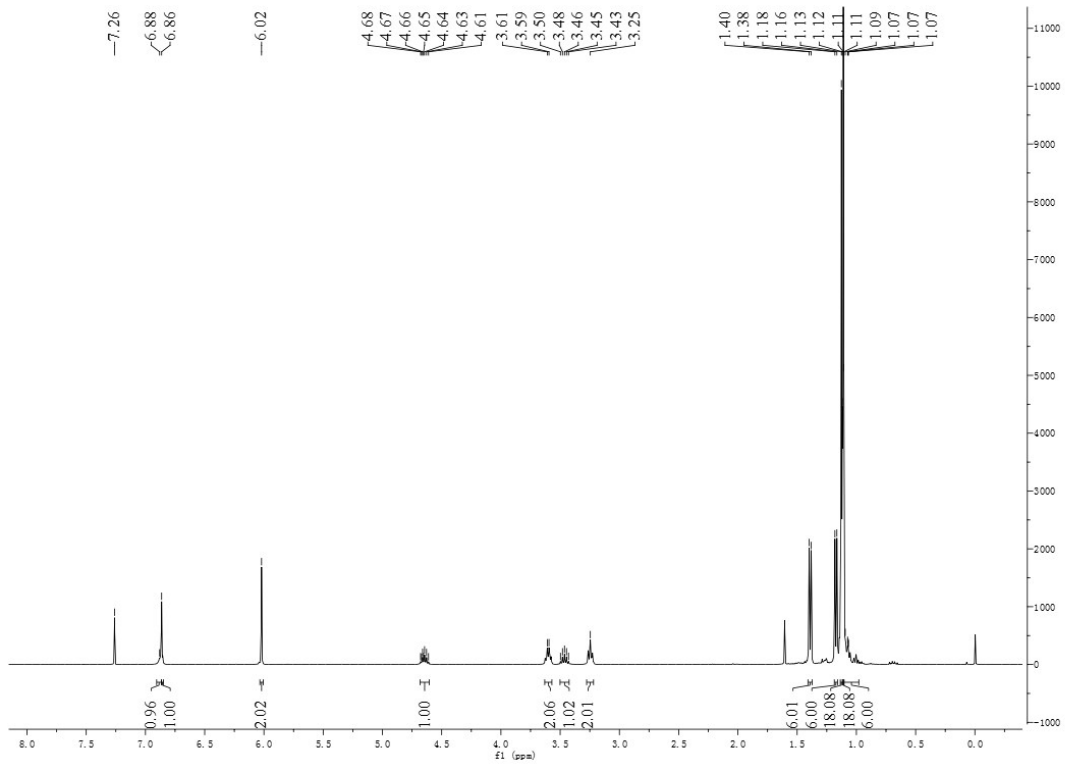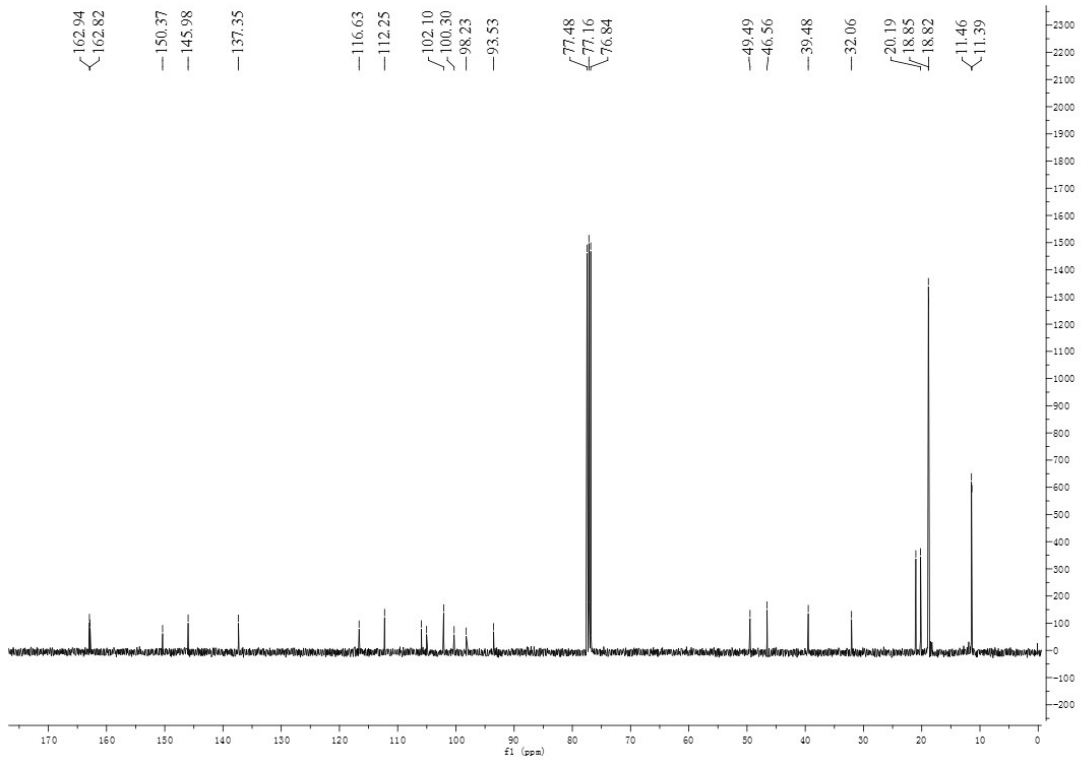

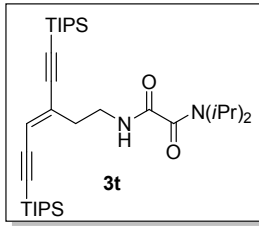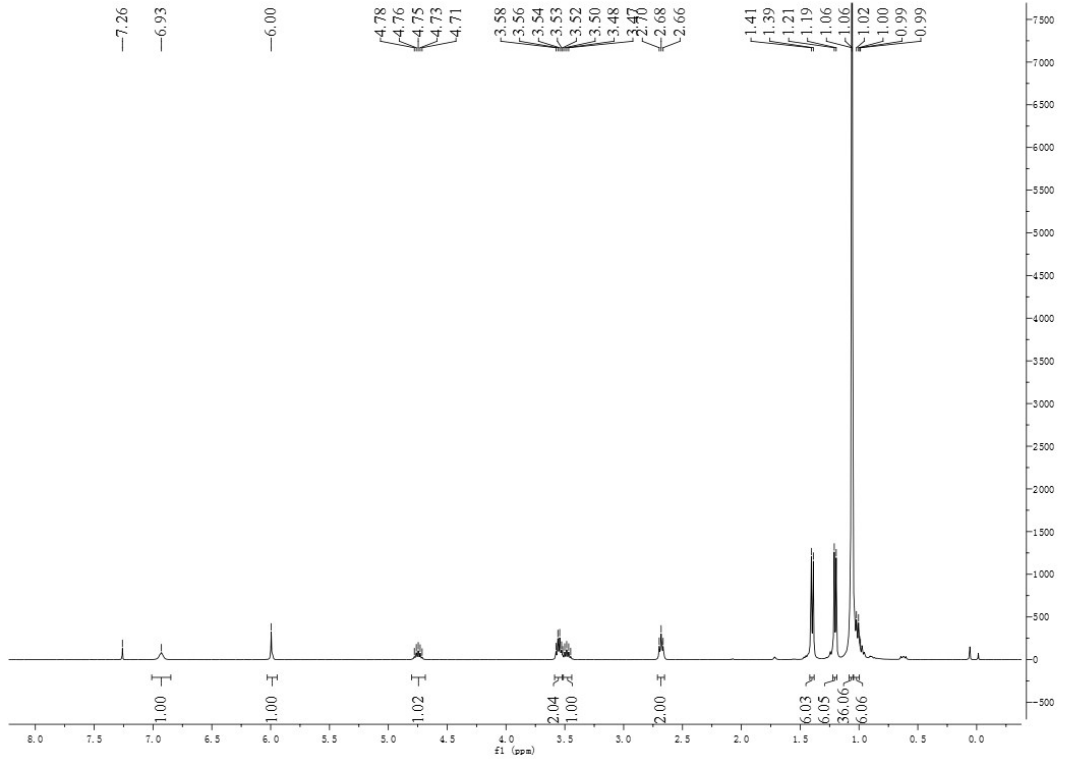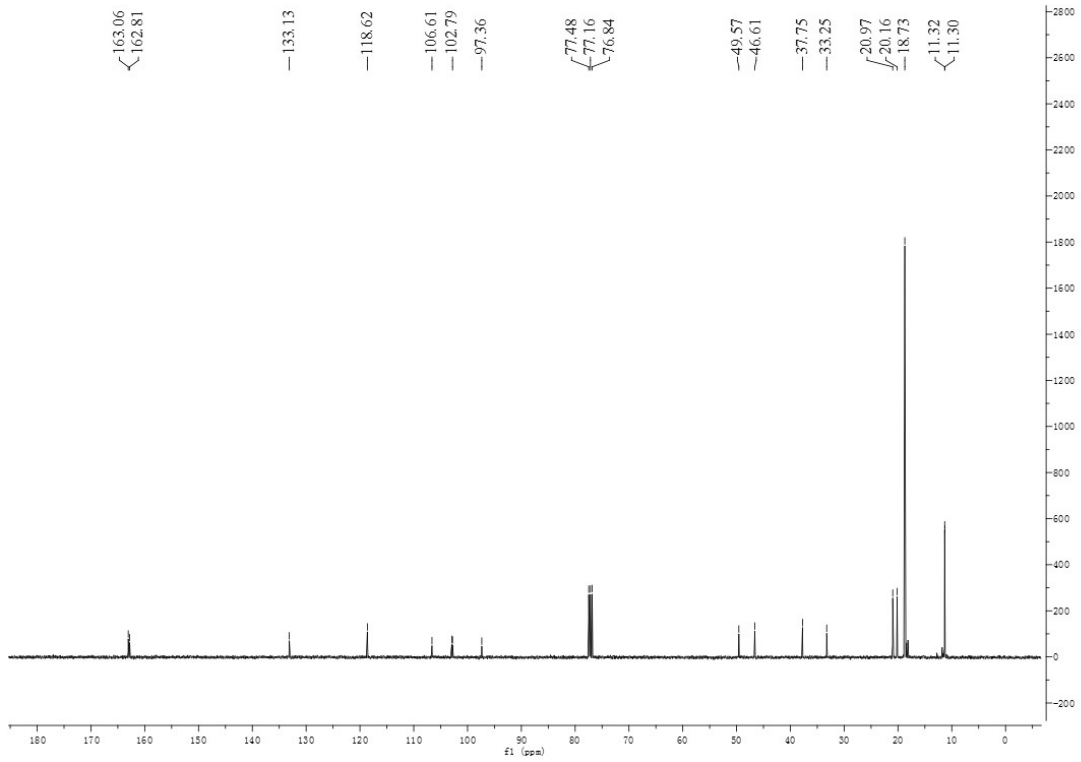

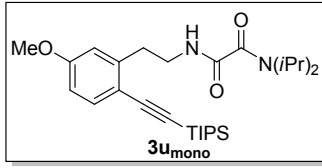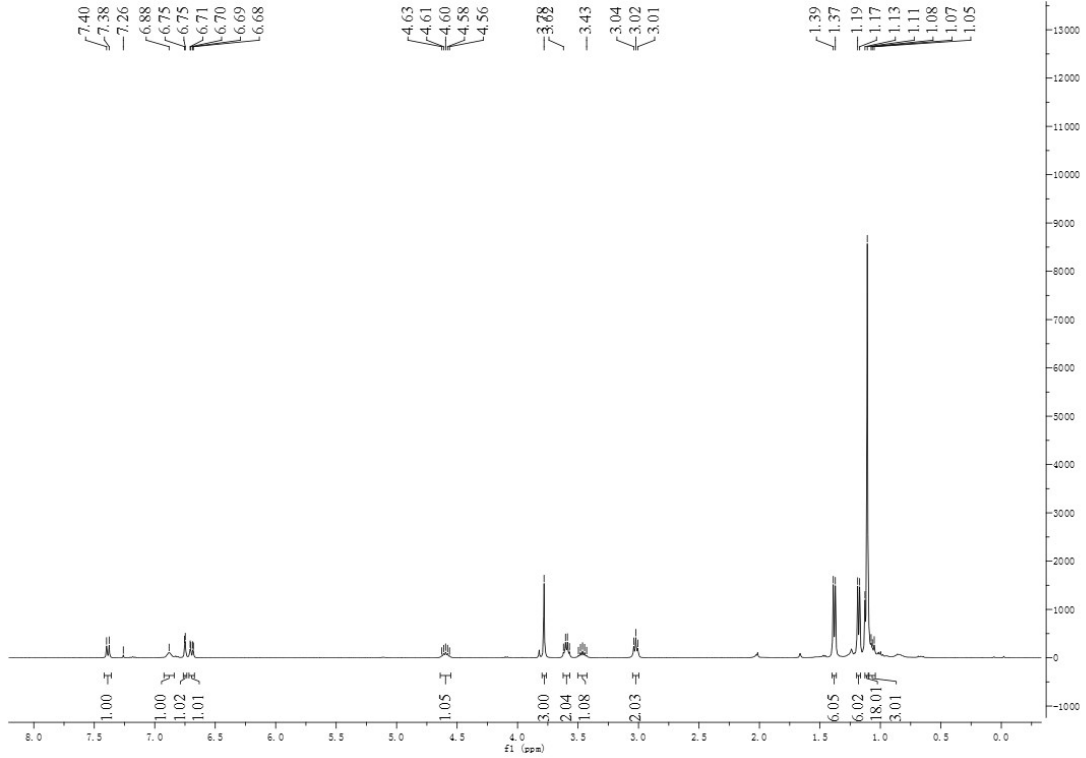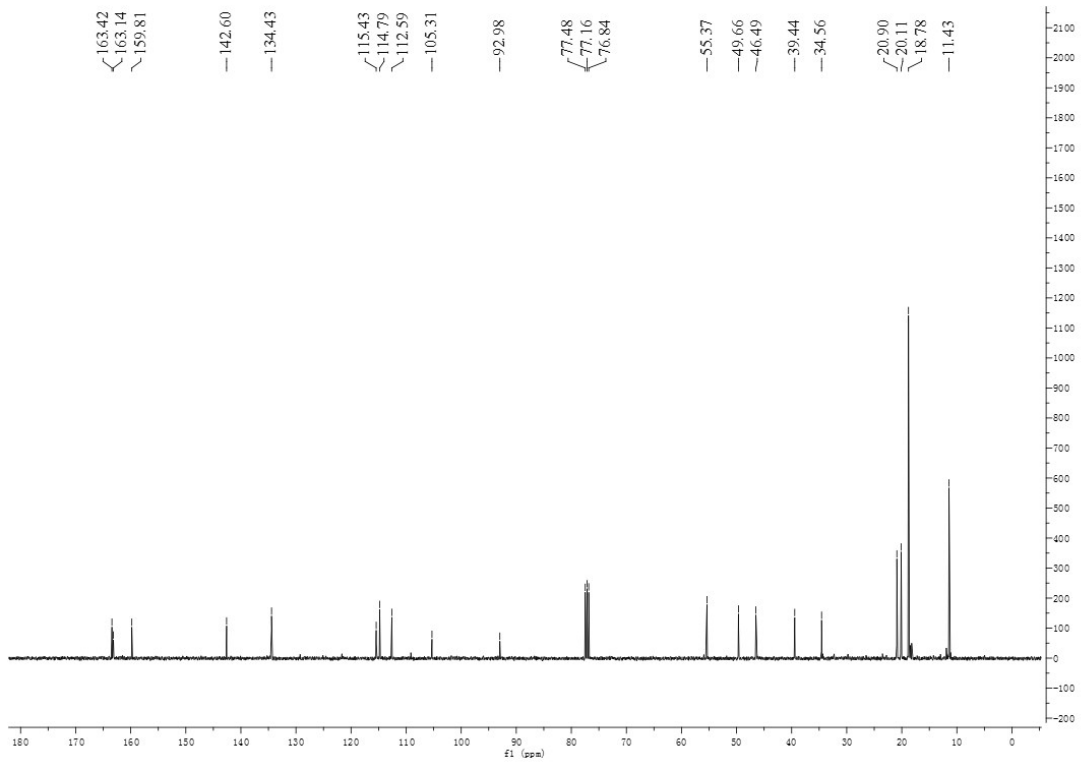

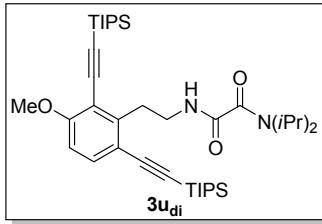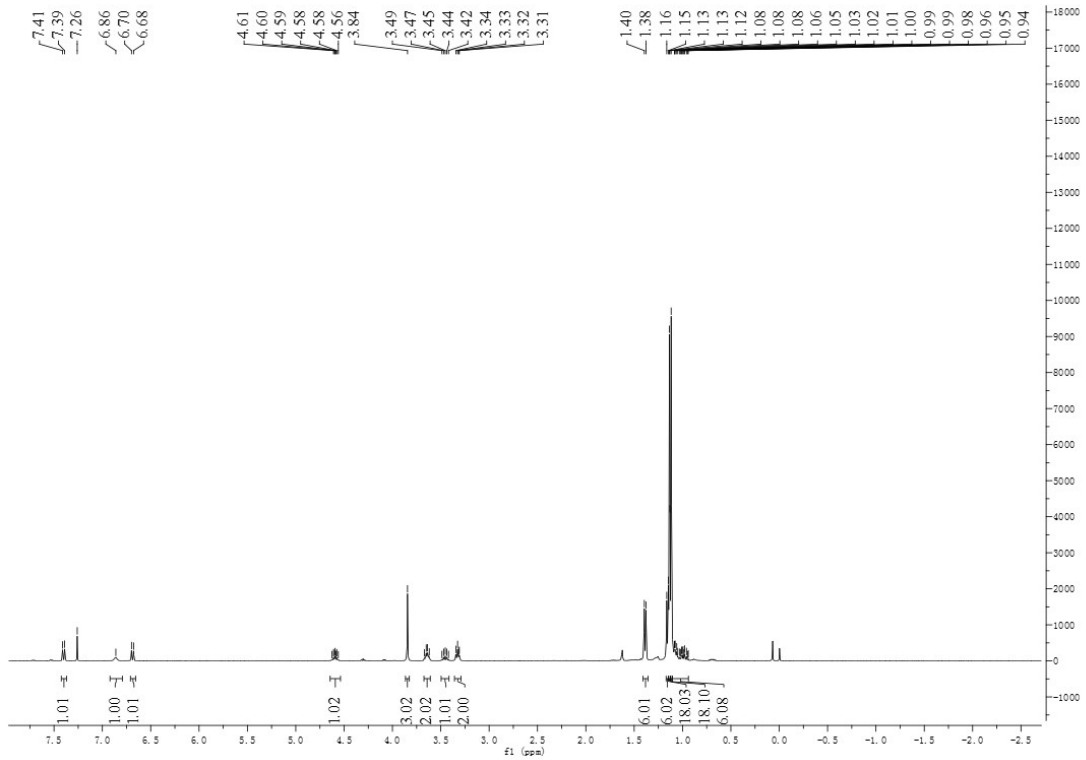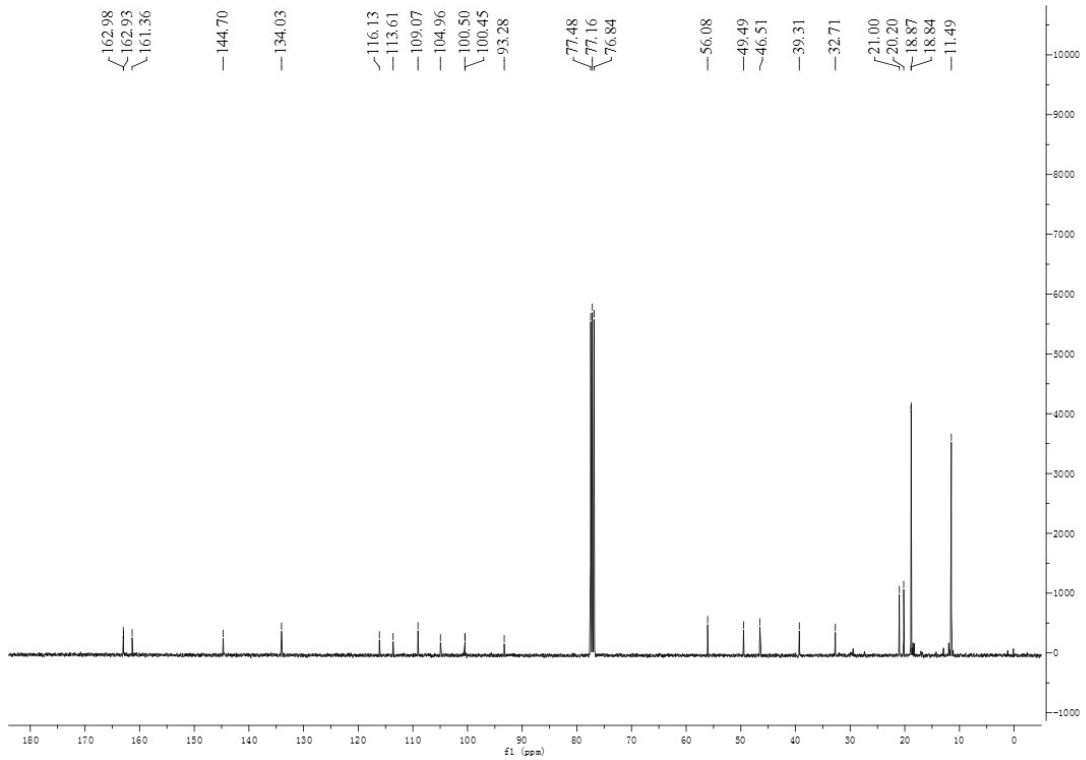

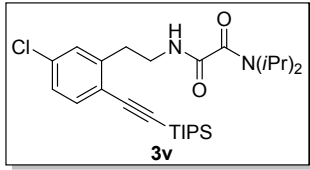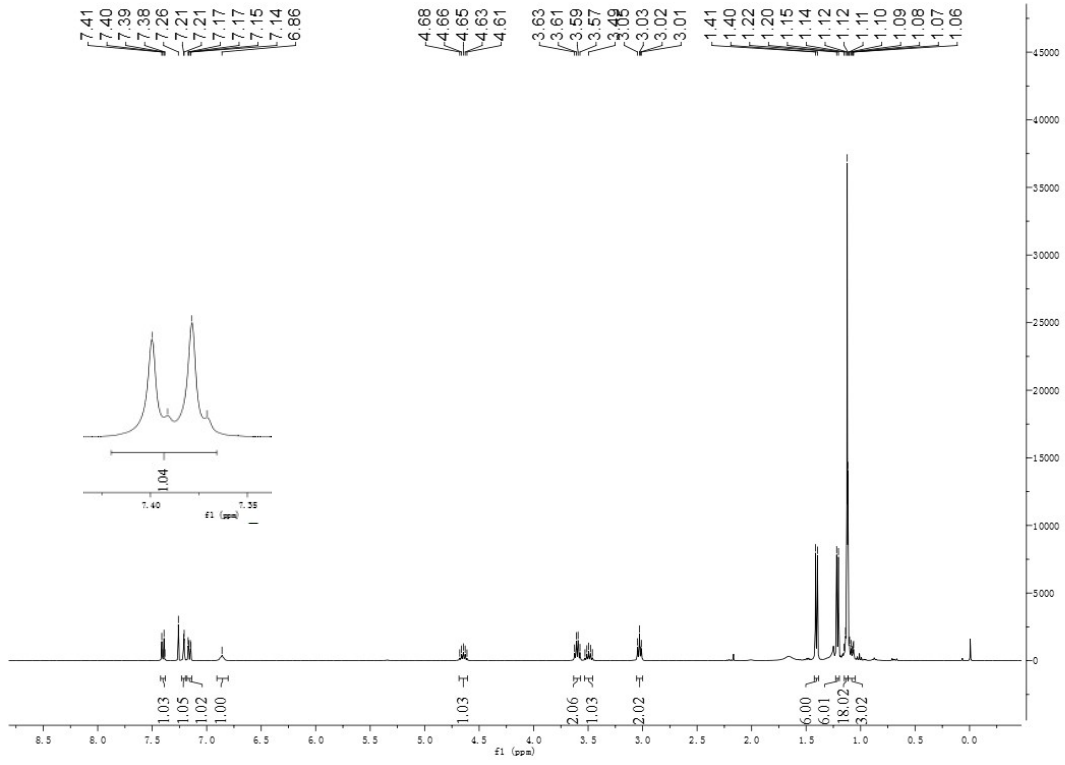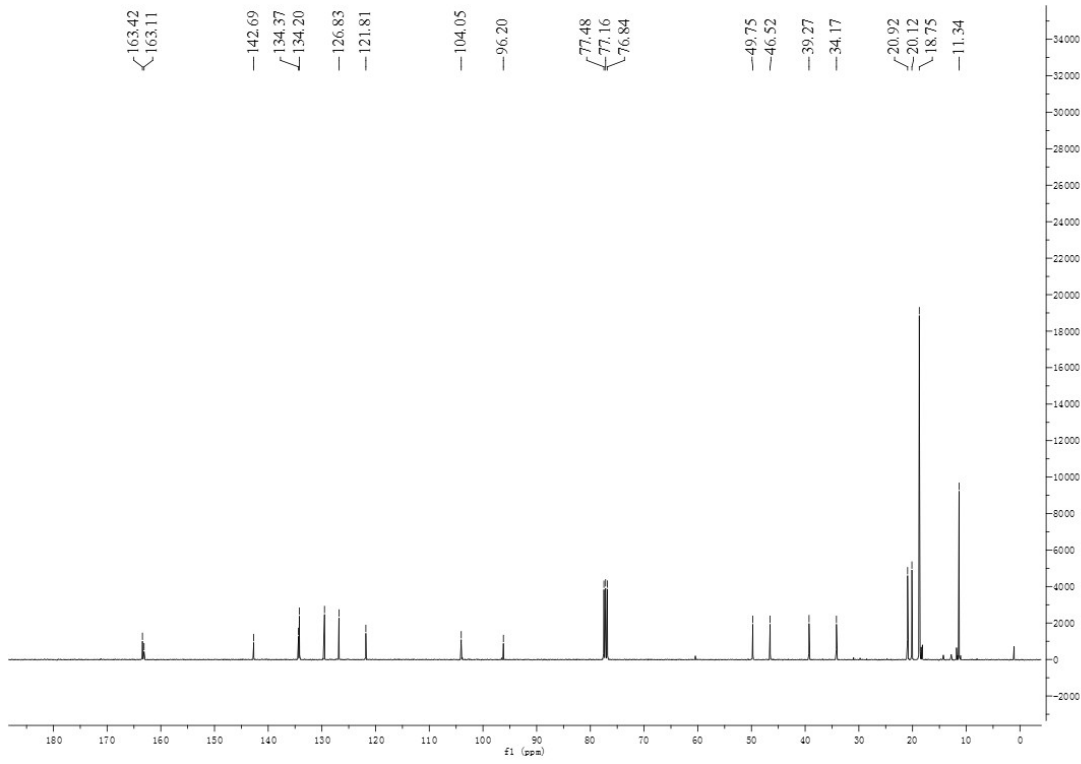

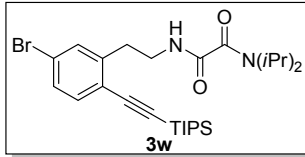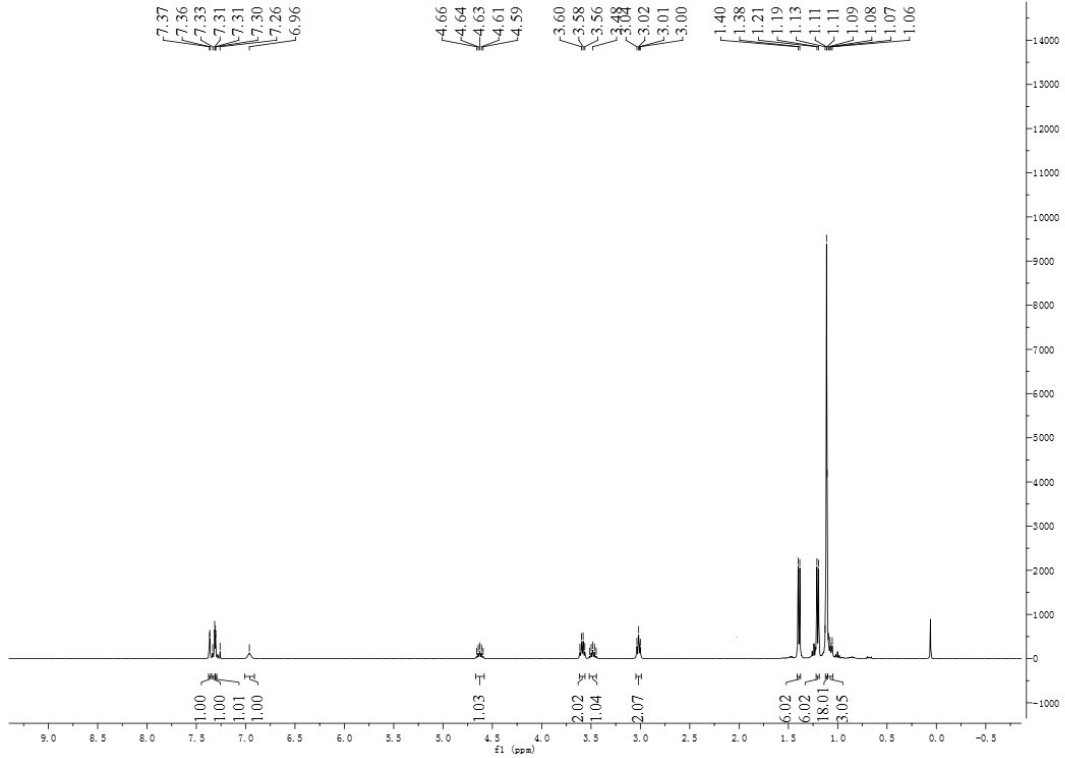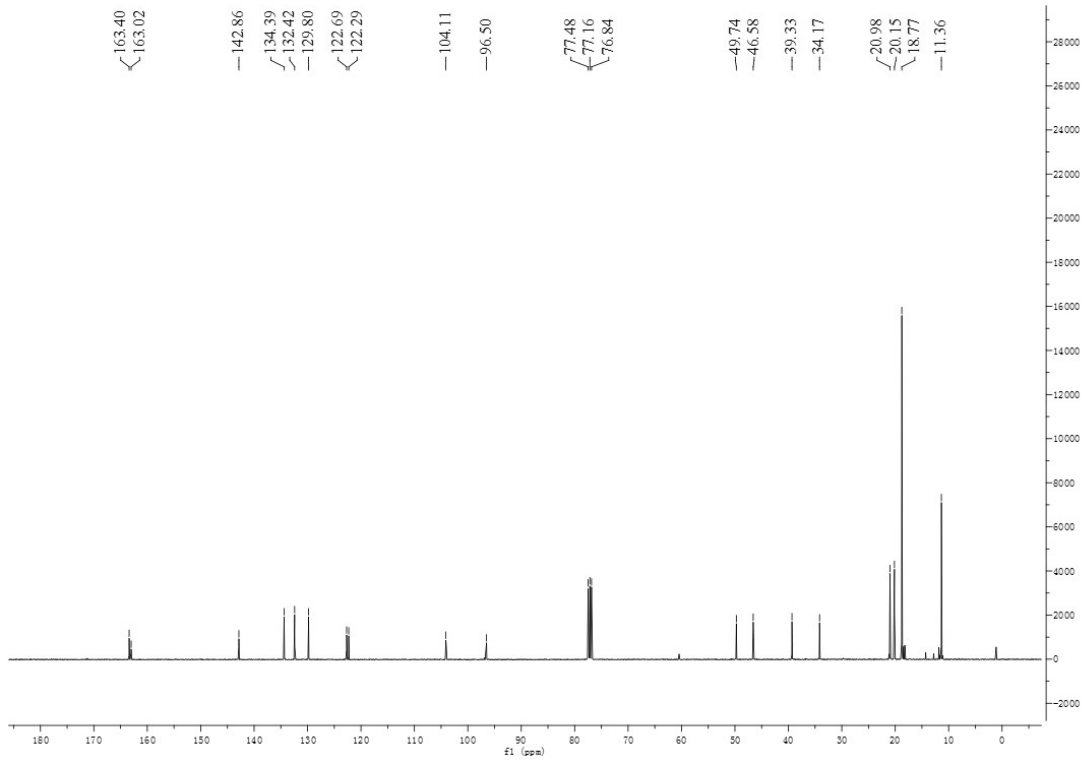

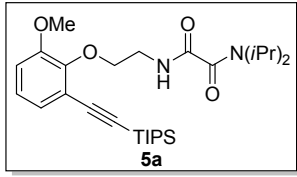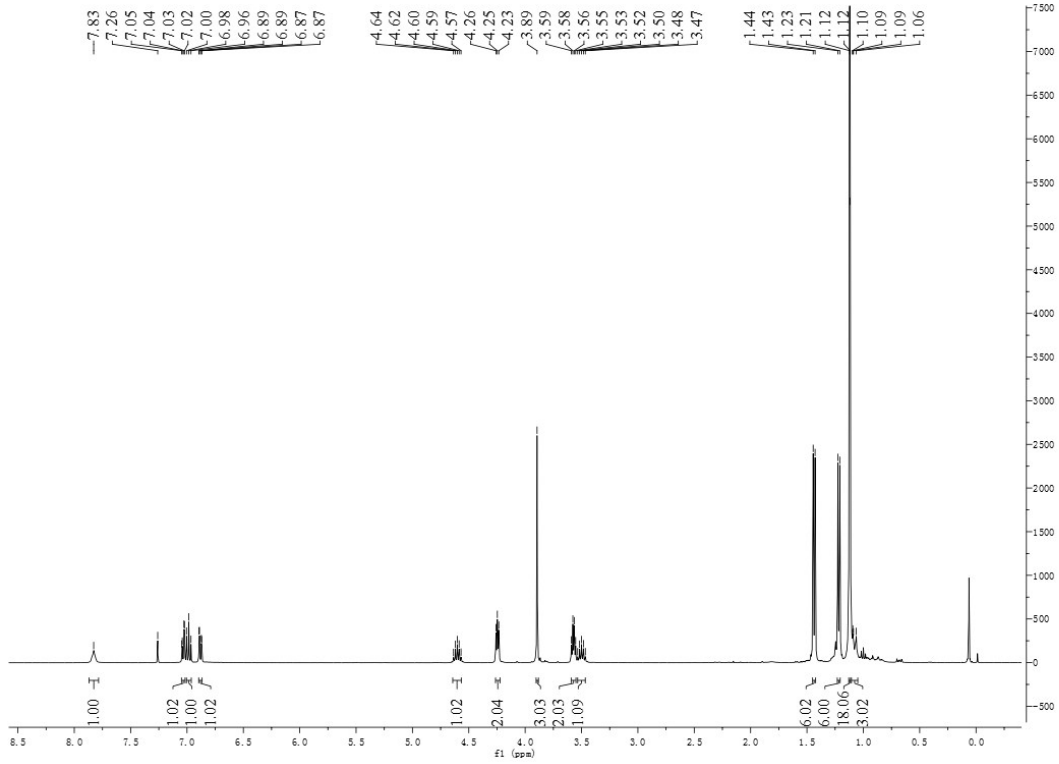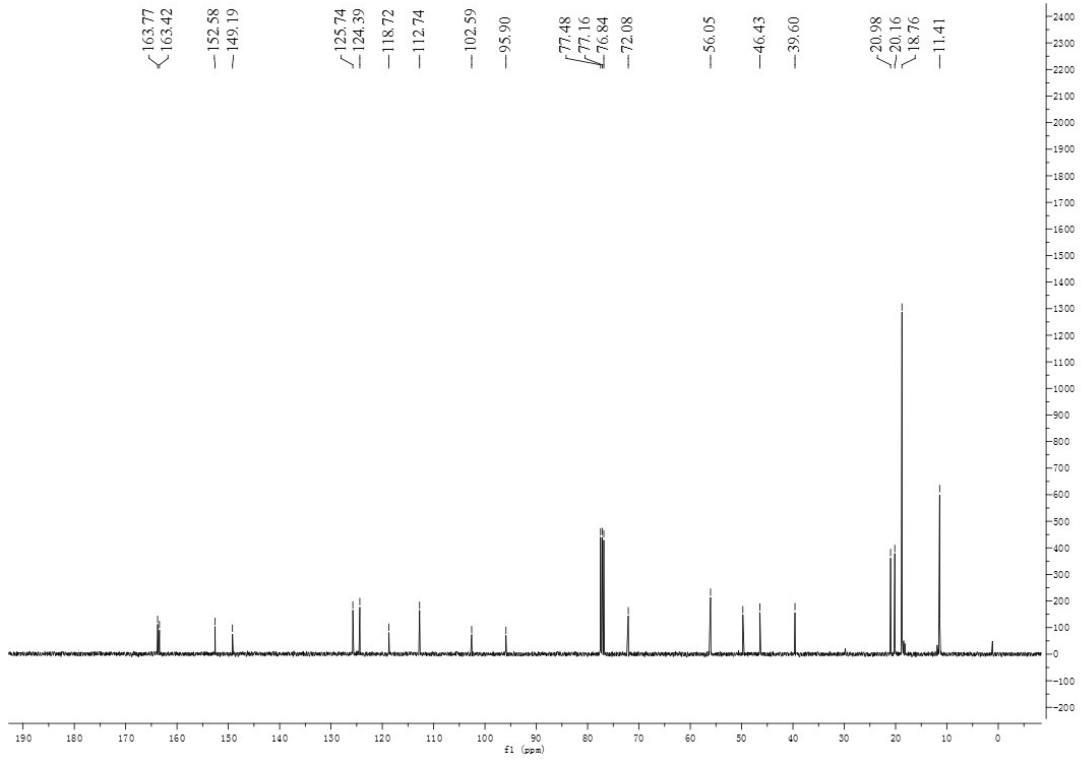



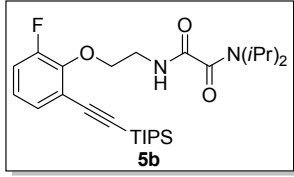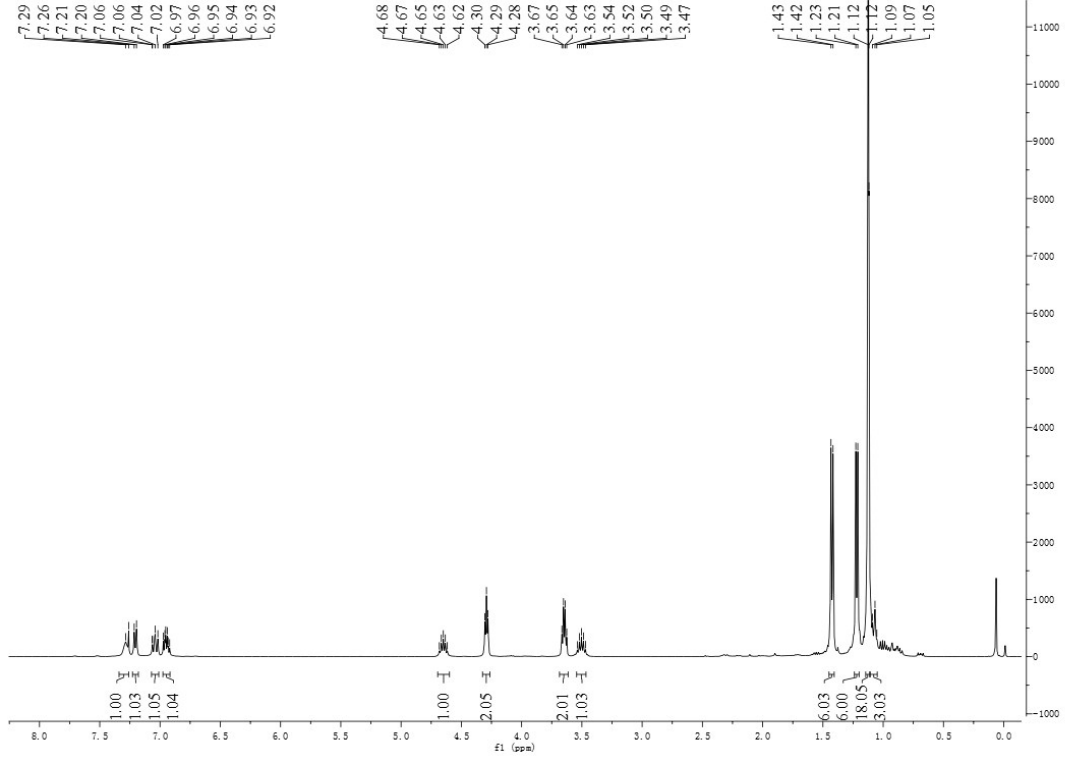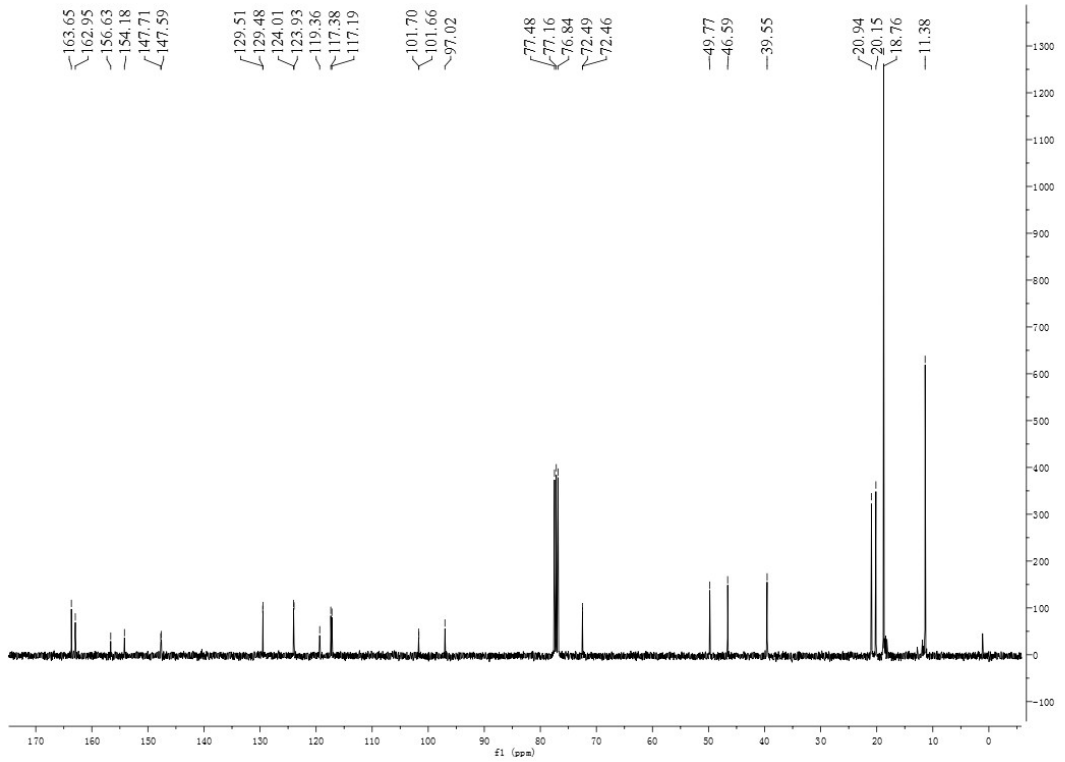

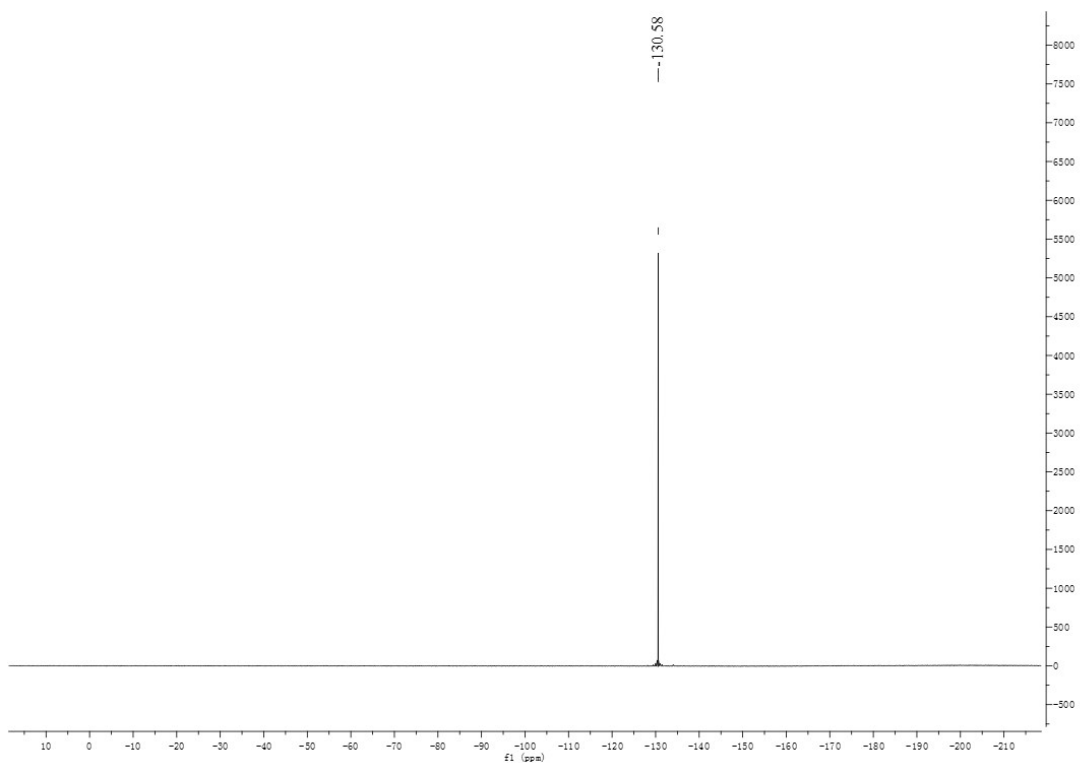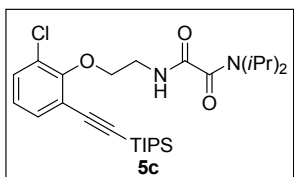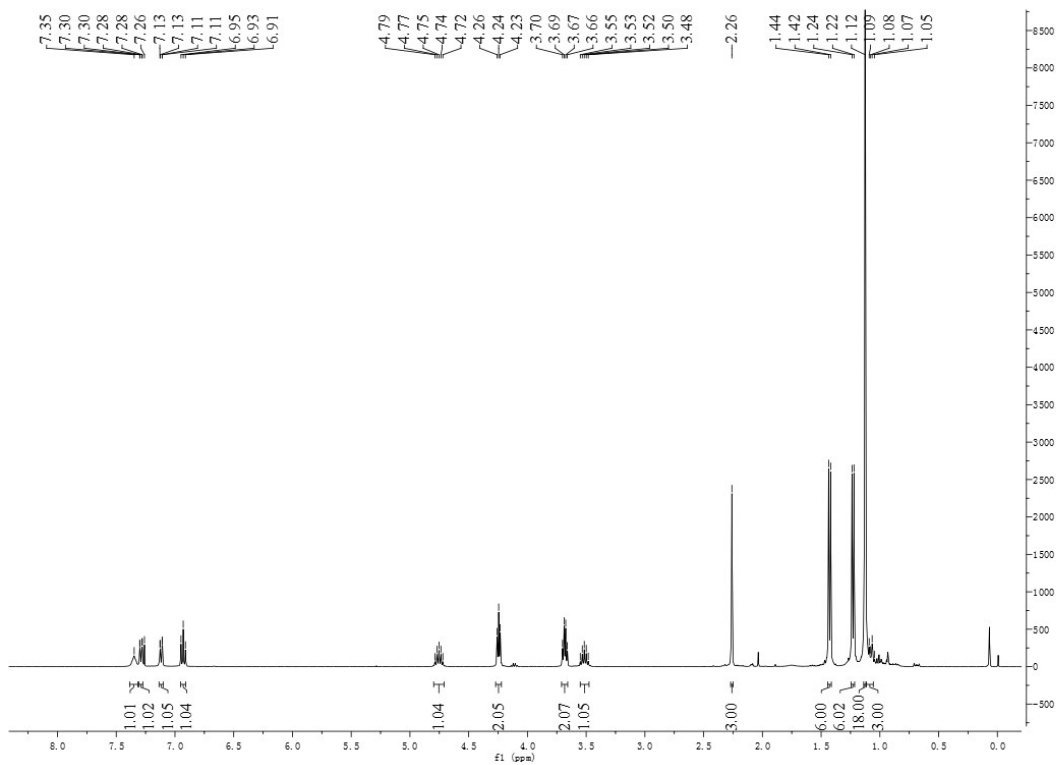

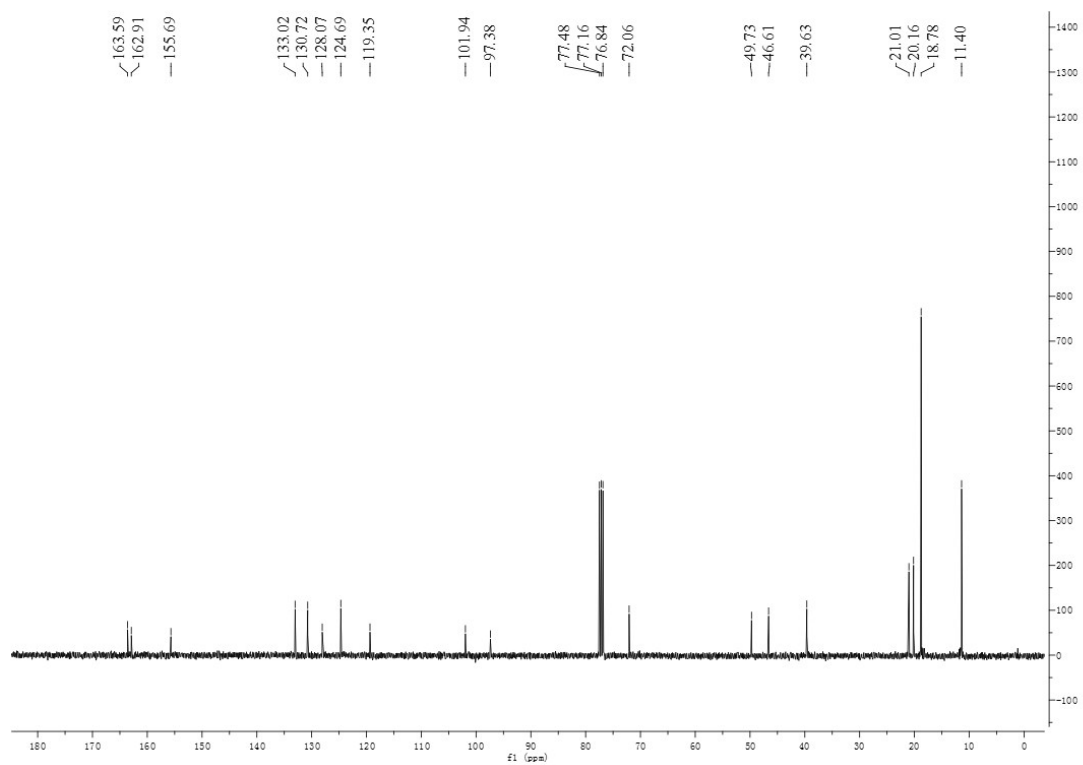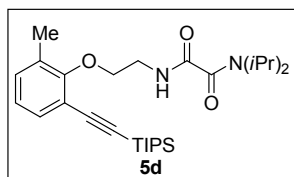

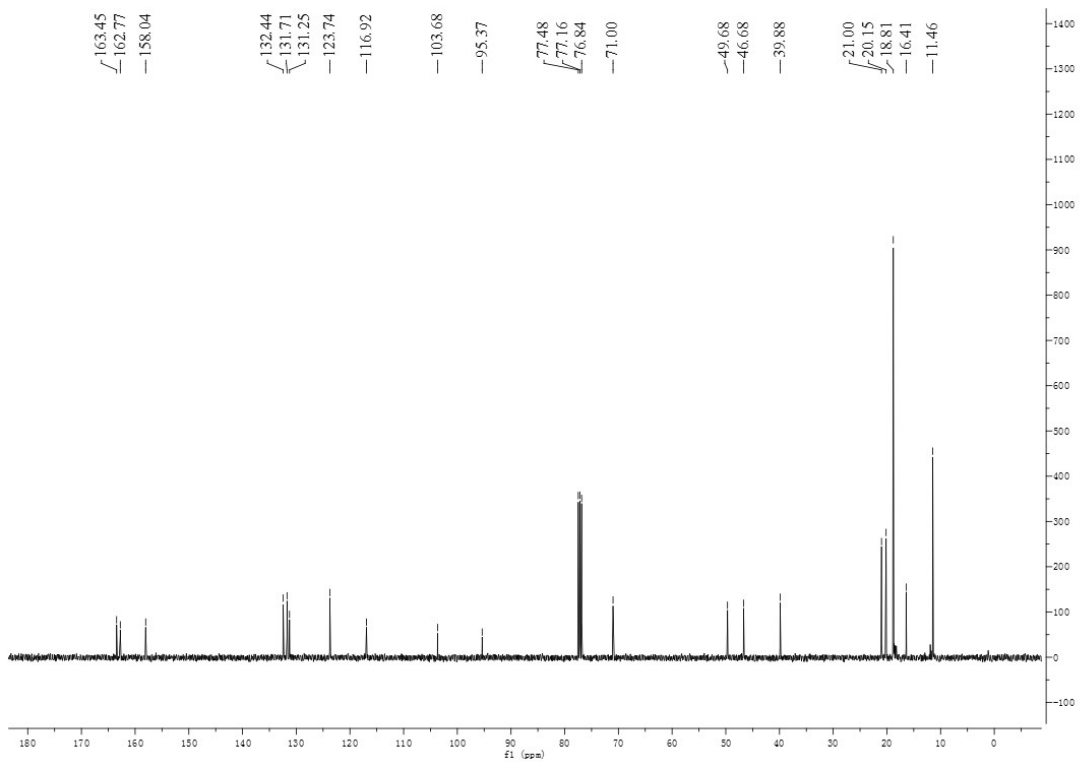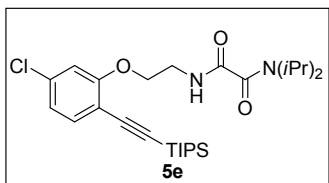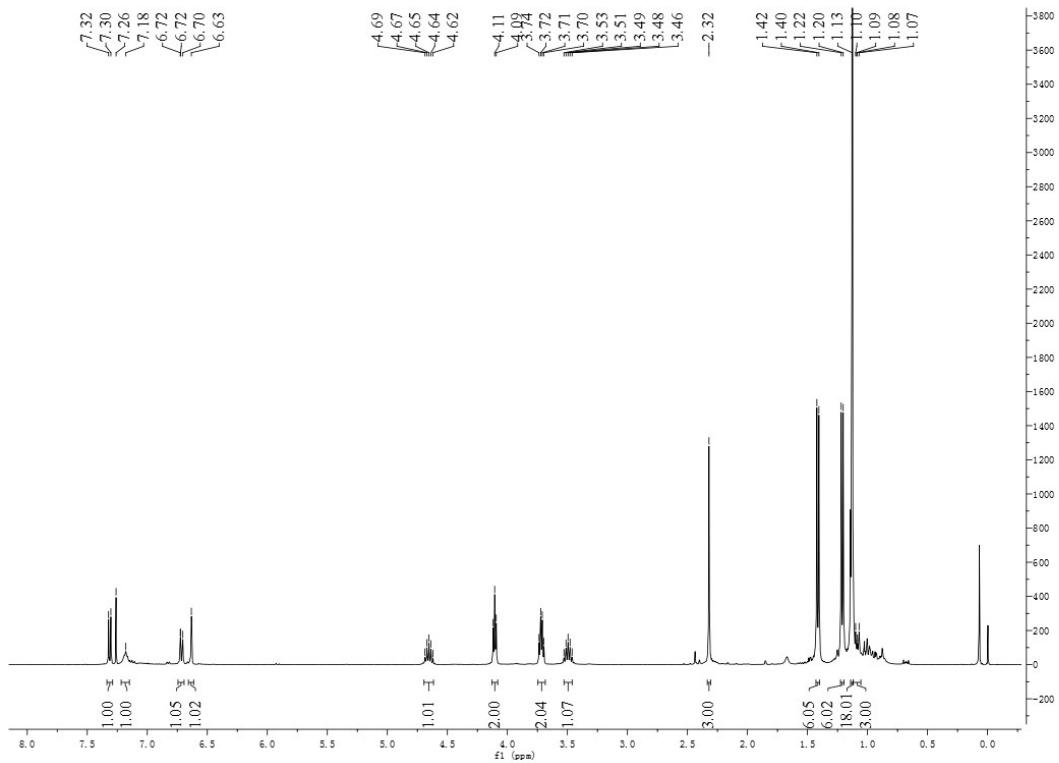

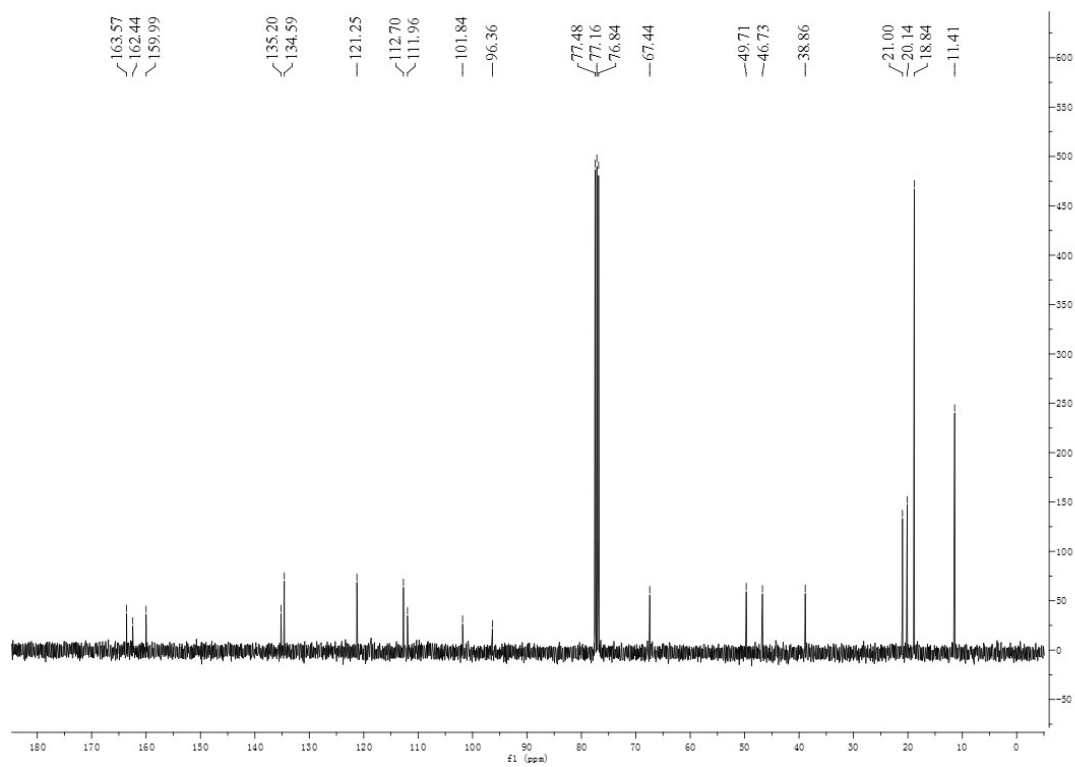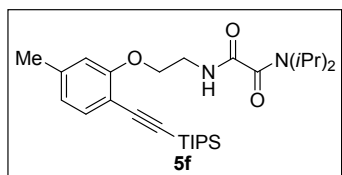

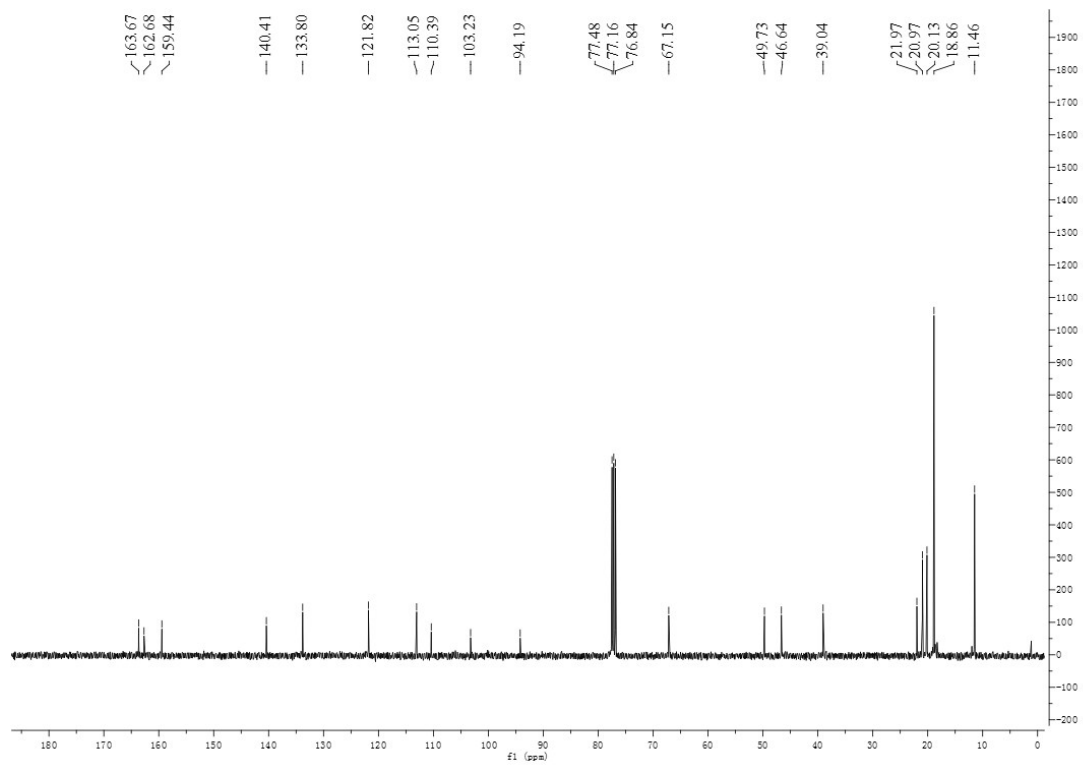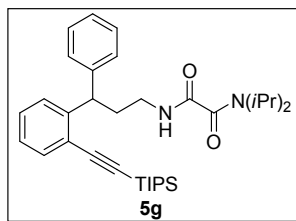

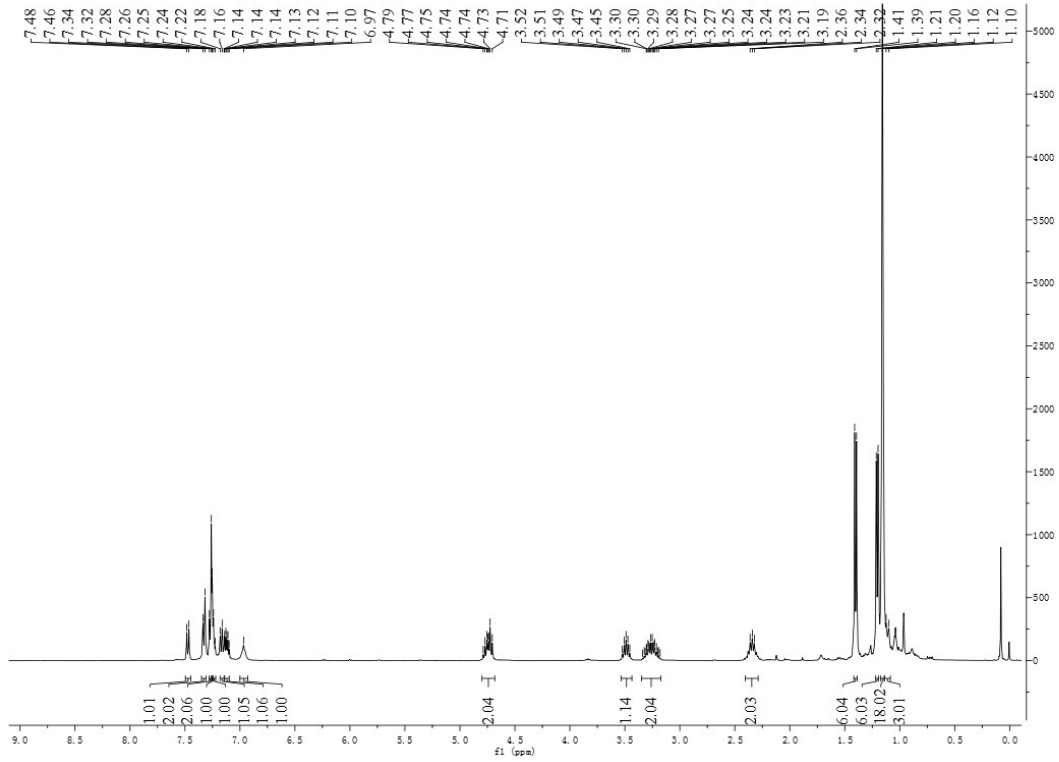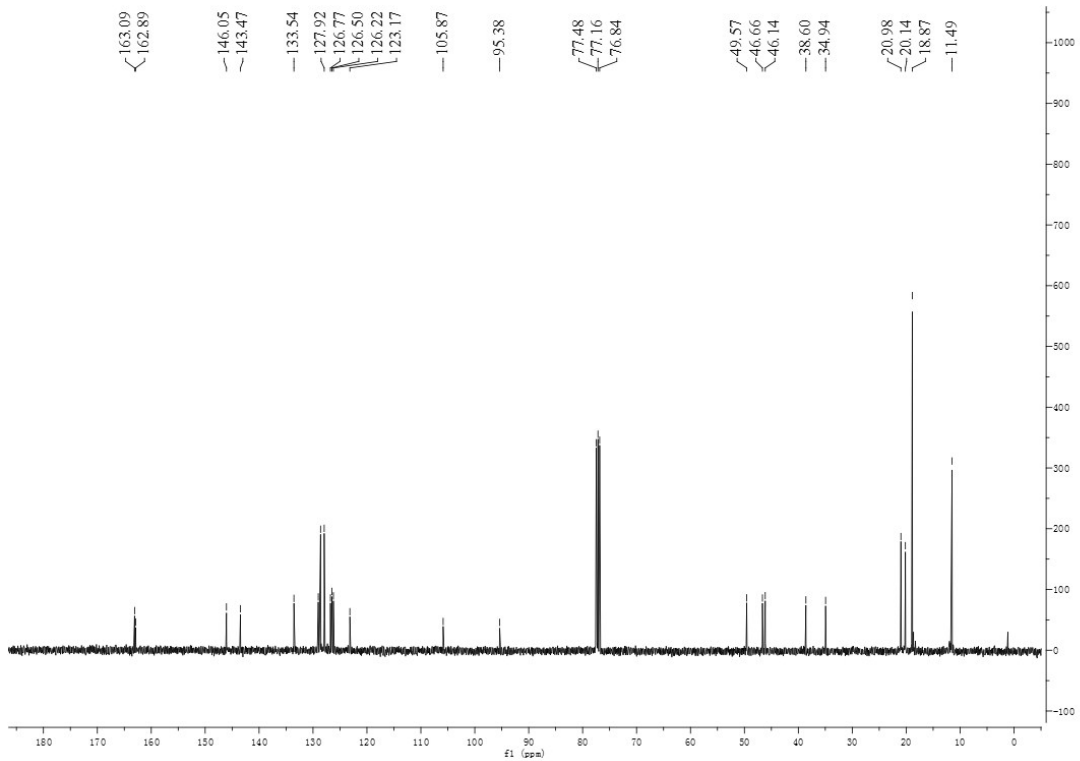

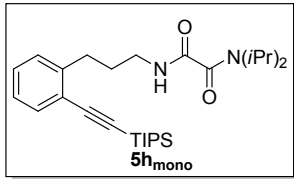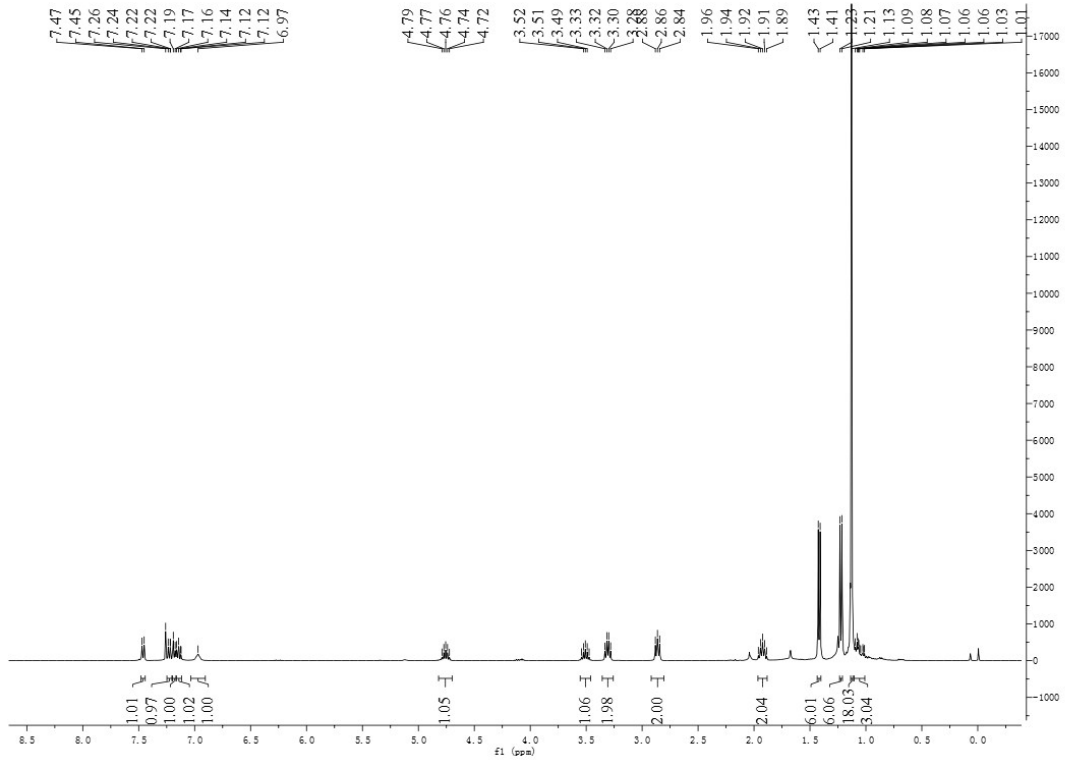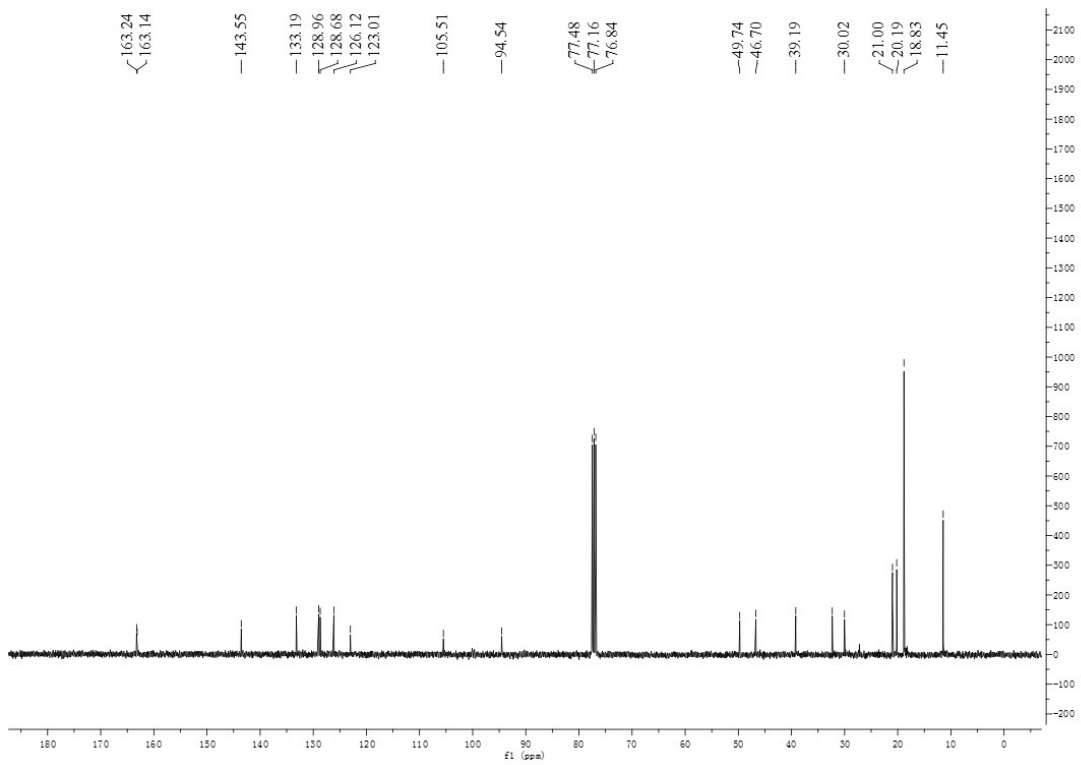



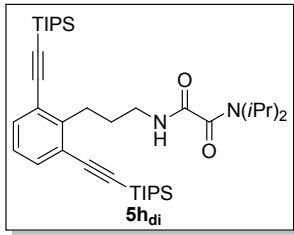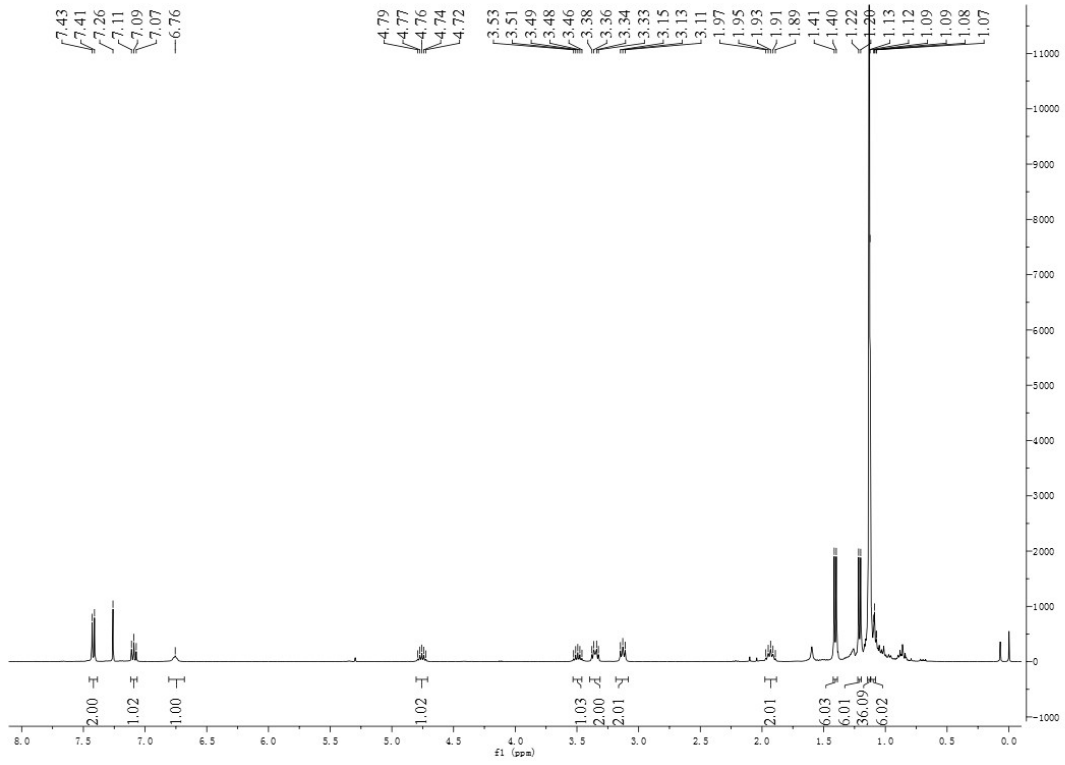

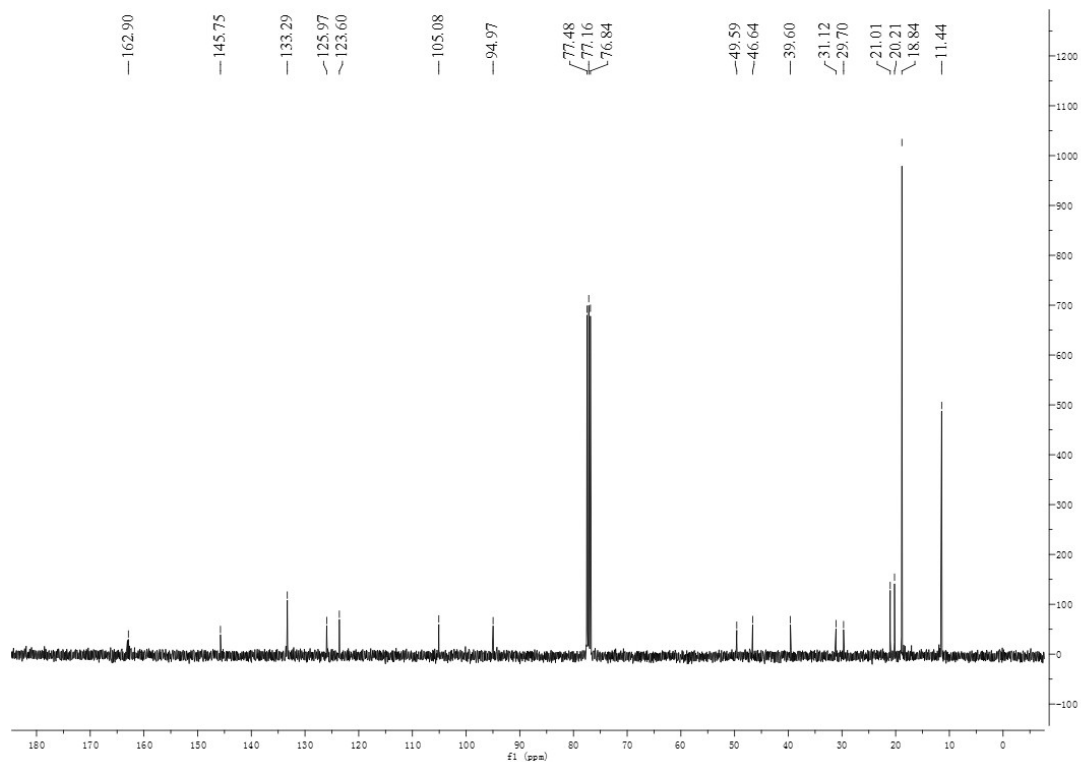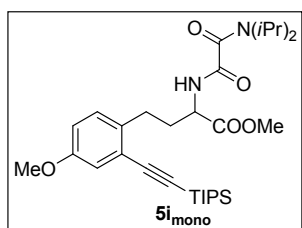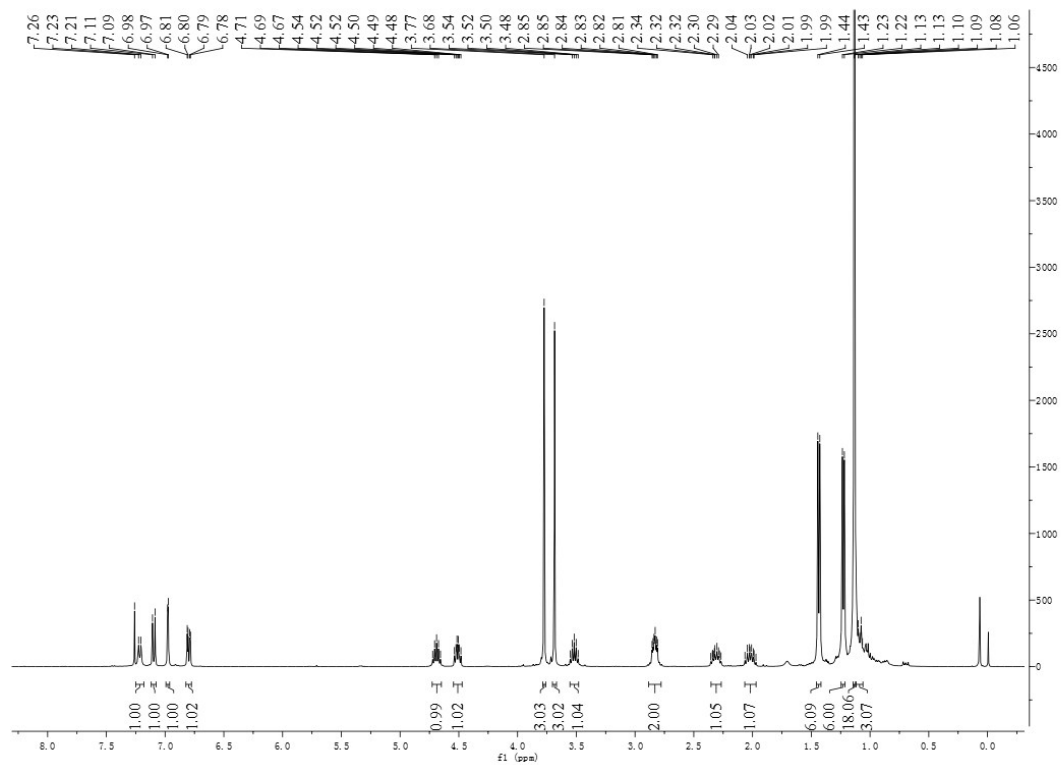

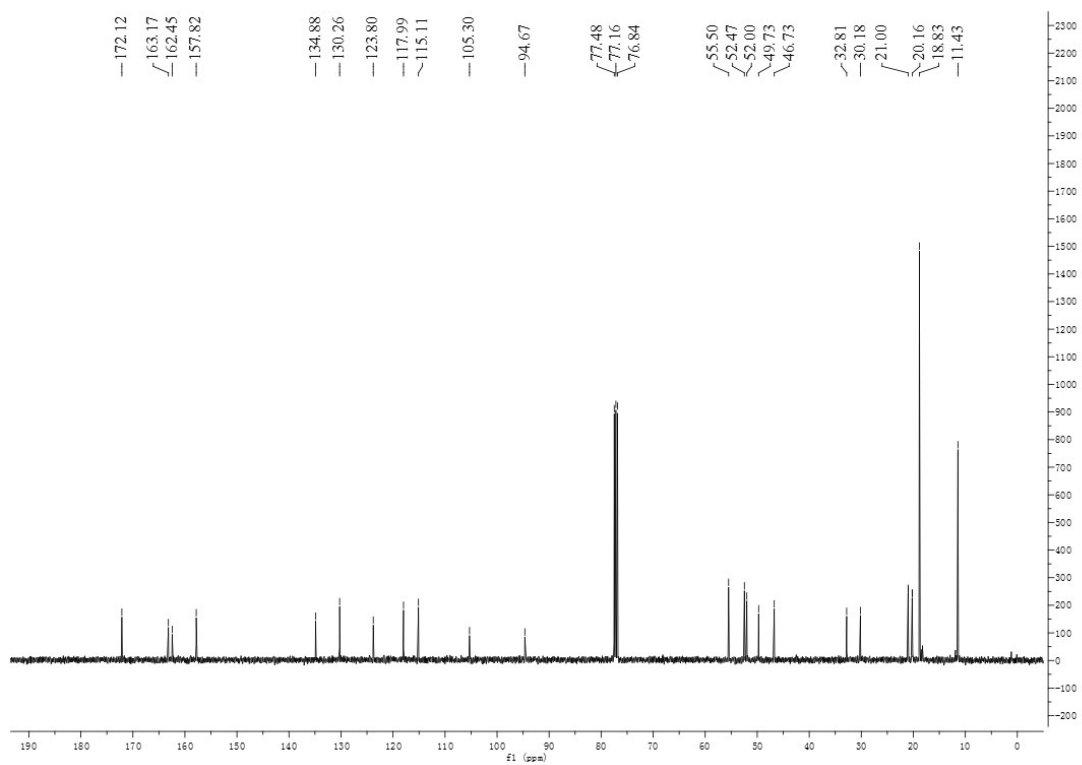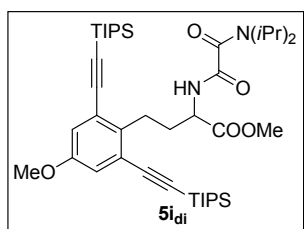



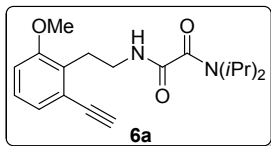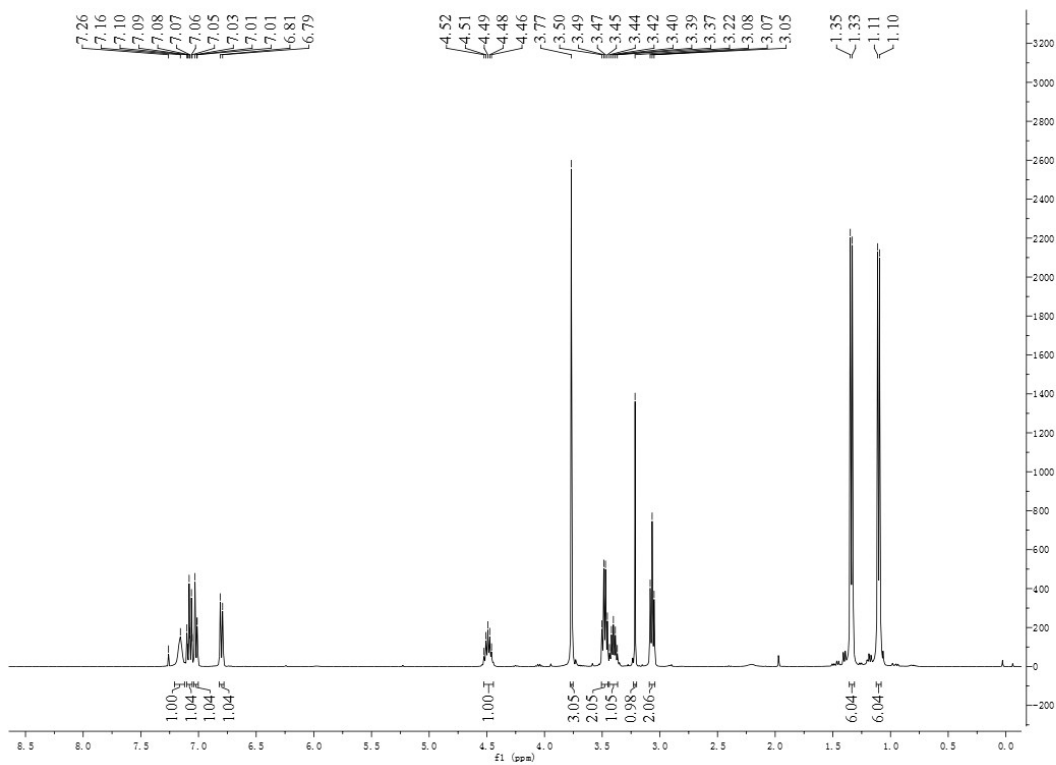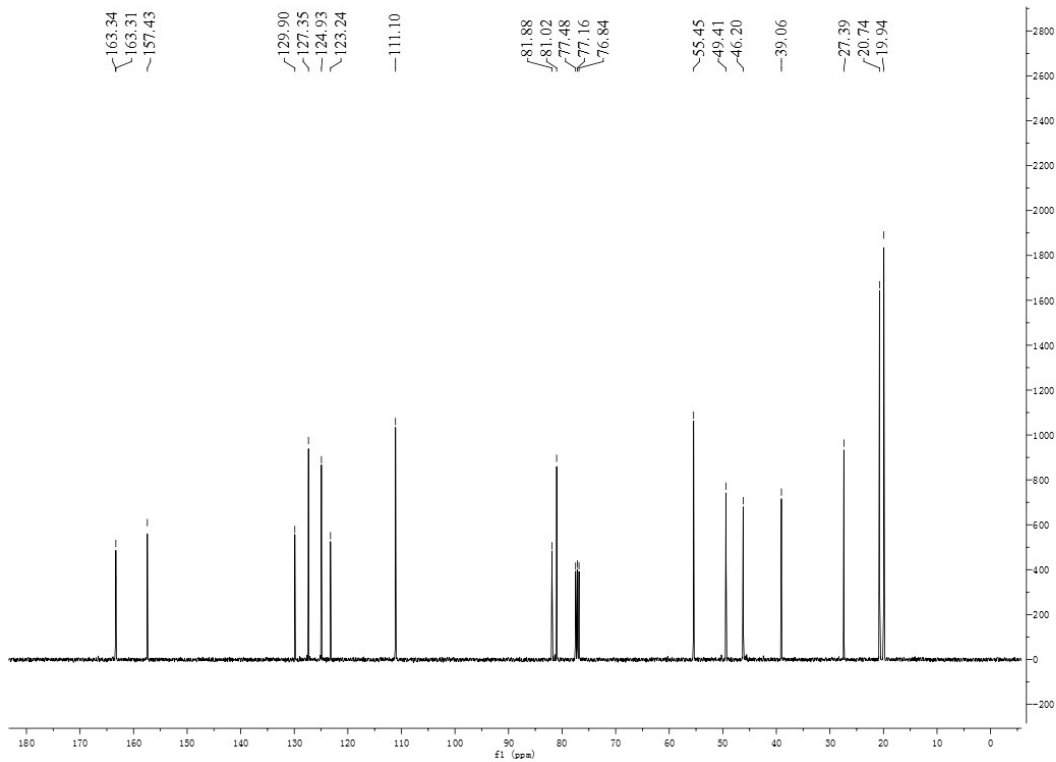

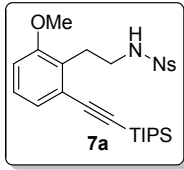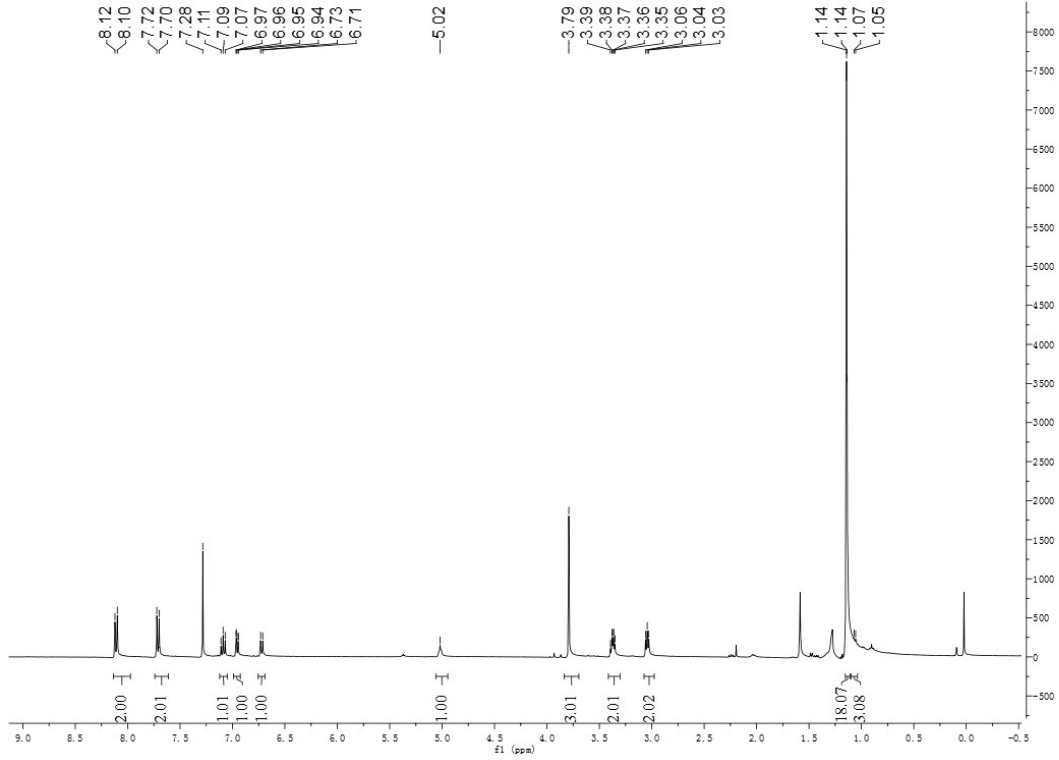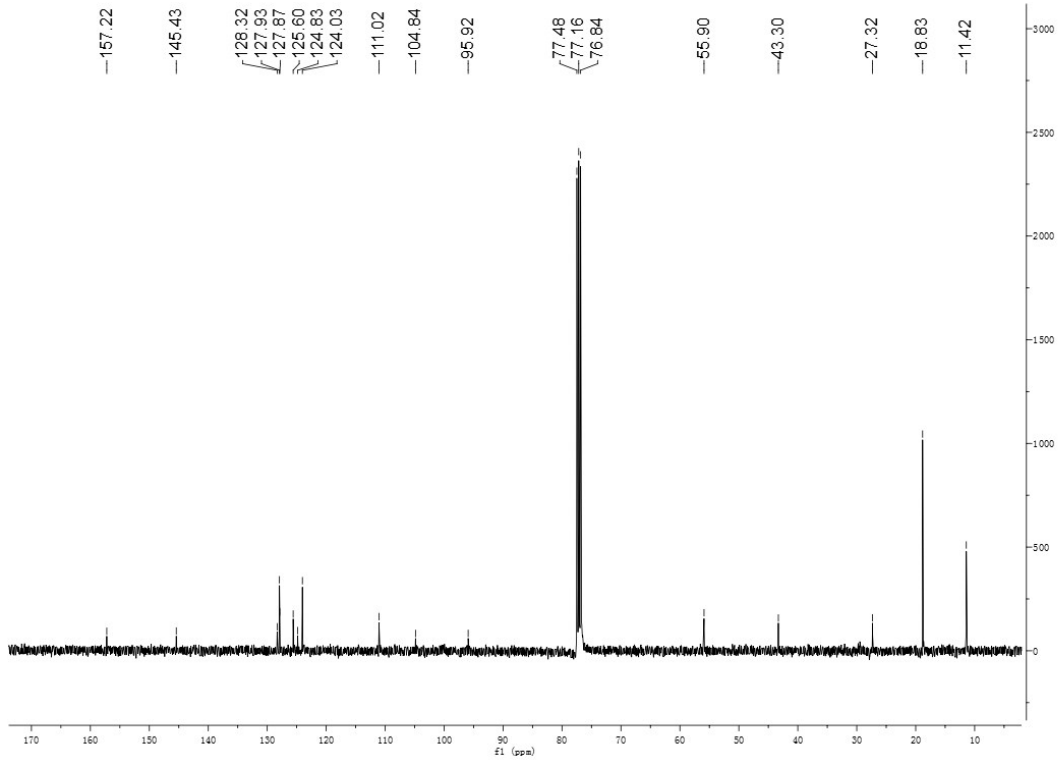

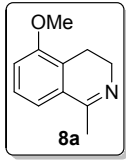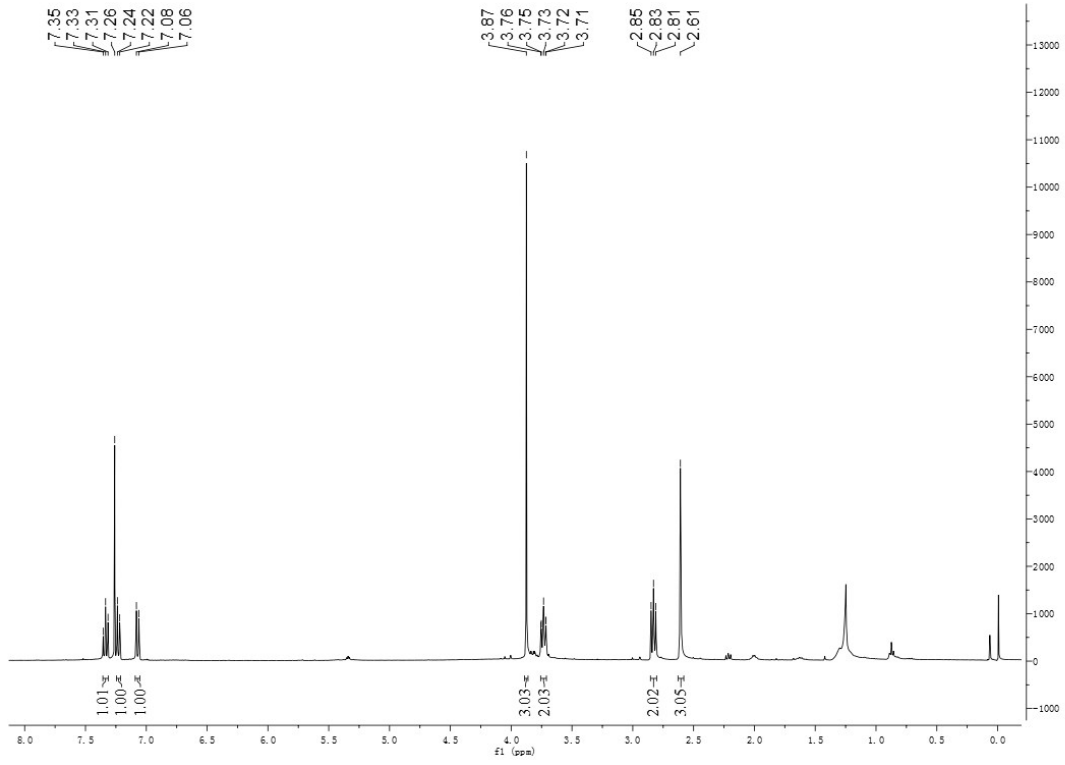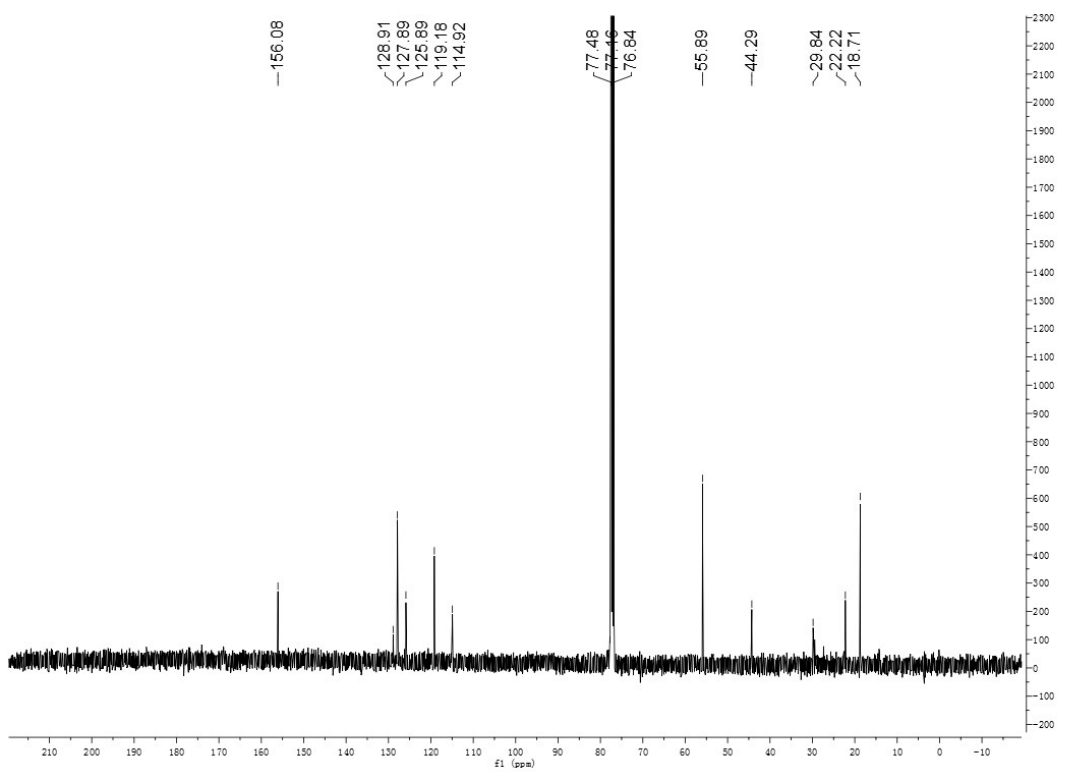

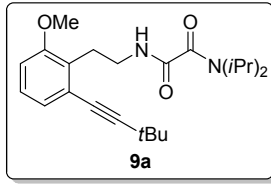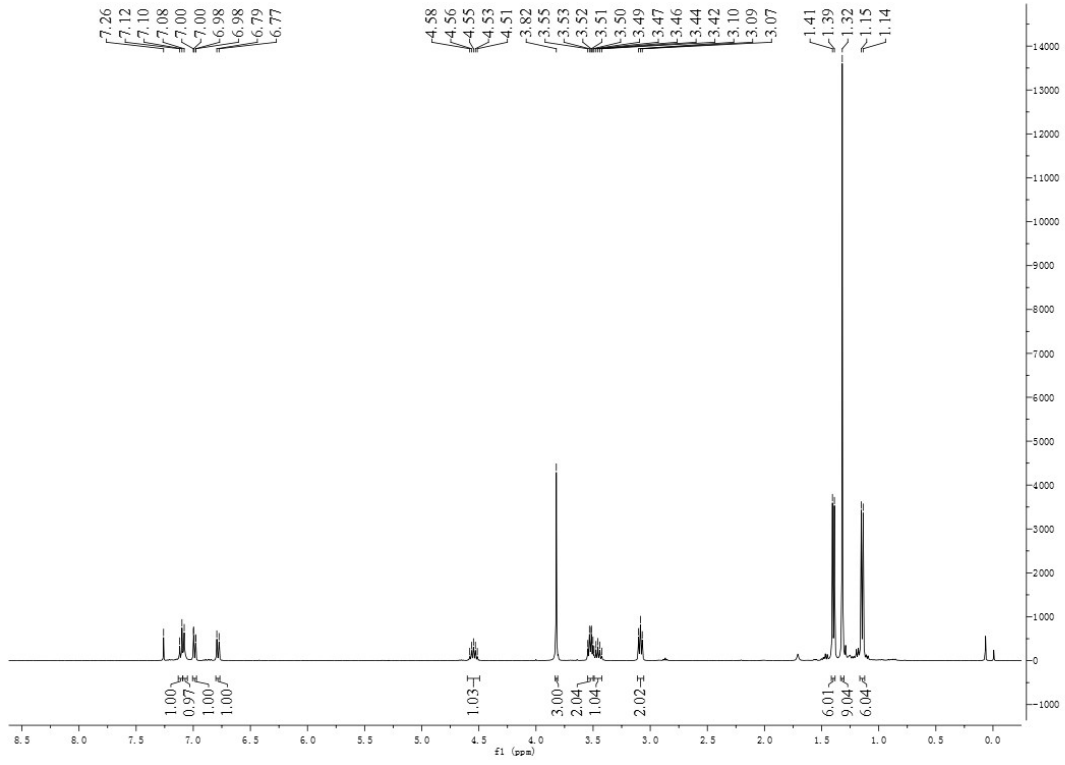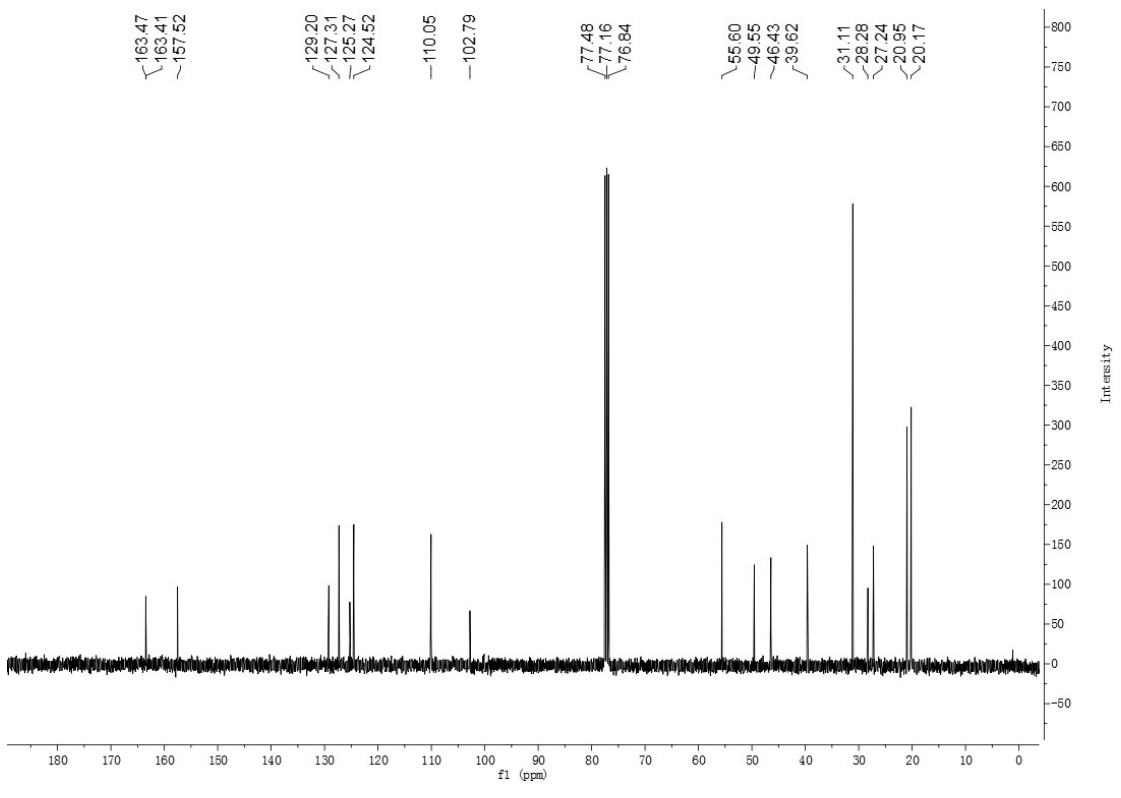



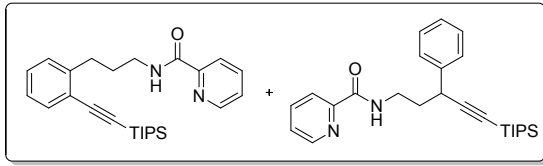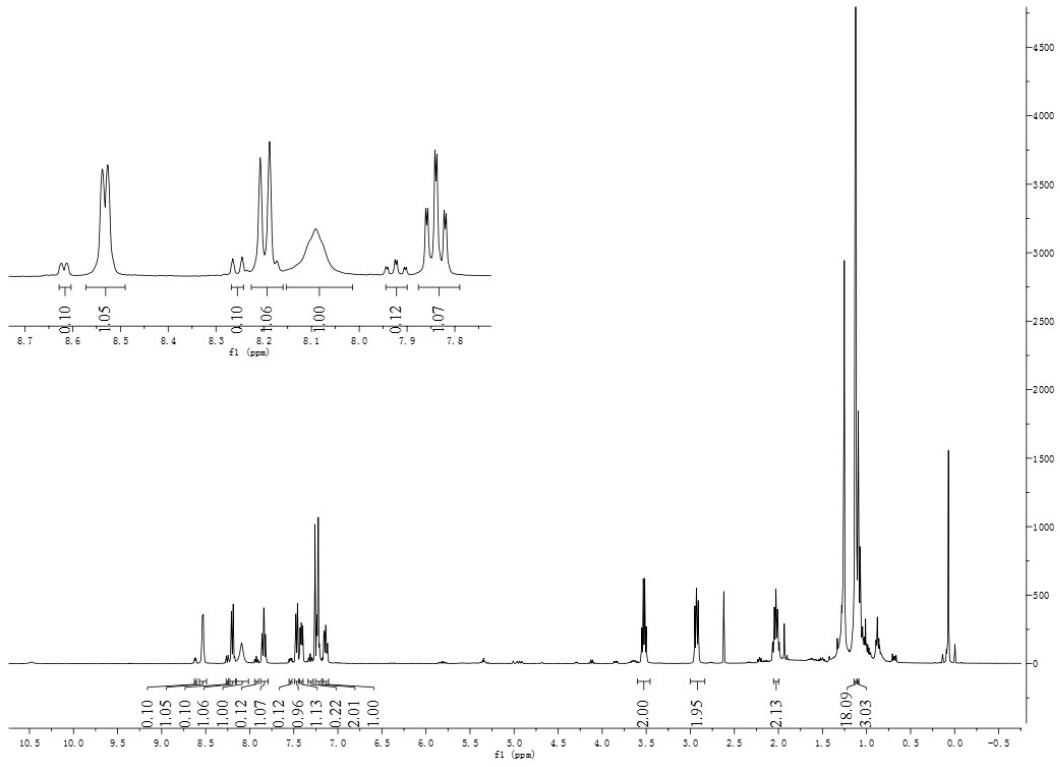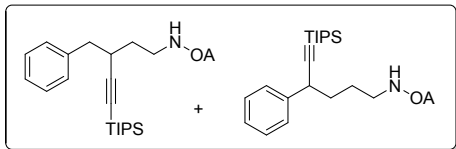

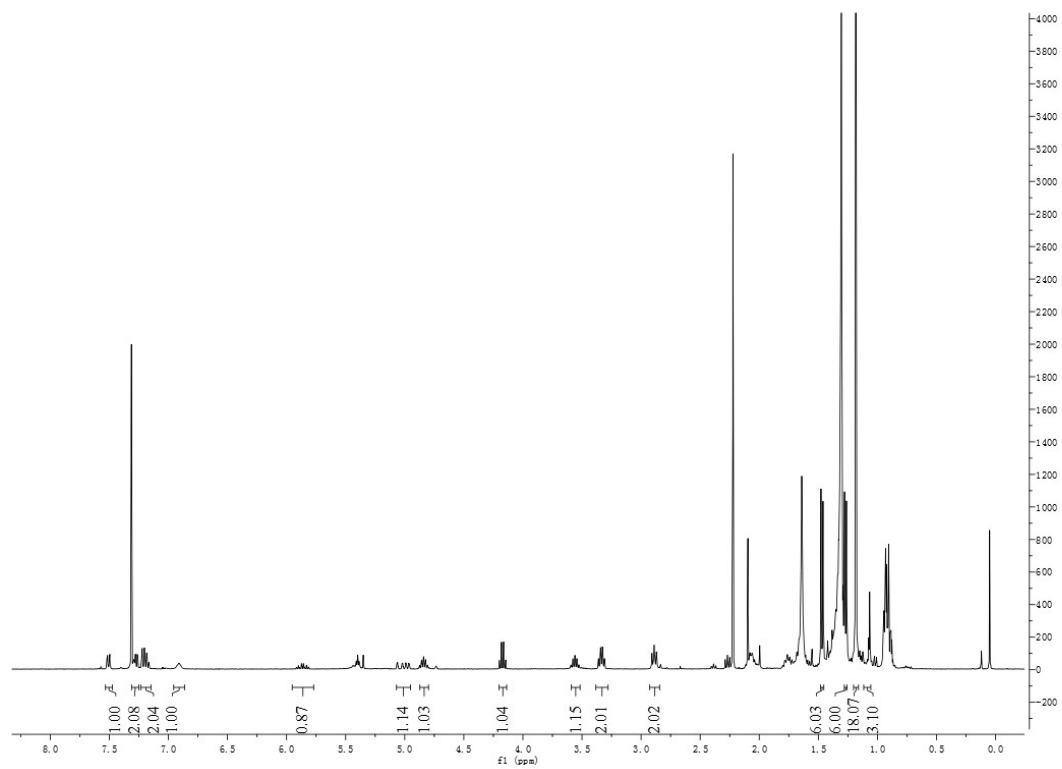

Supplement: c5cc04390e1.pdf [file c5cc04390e1.pdf]
